# Supplementary material
Source: PubMed Central journal article supplement (PMC2556017)

Figure S1

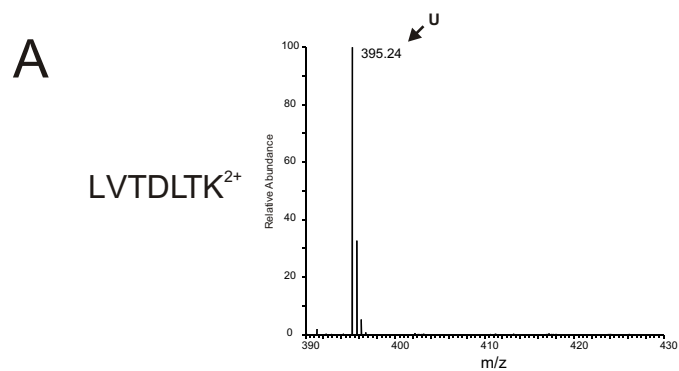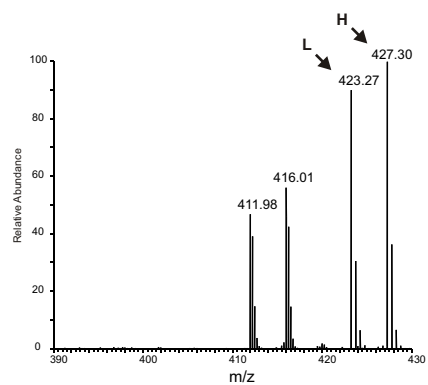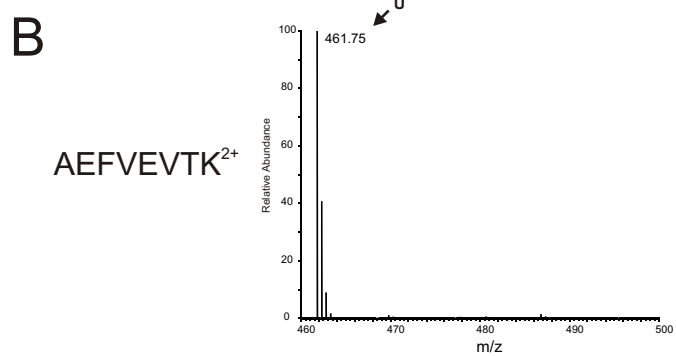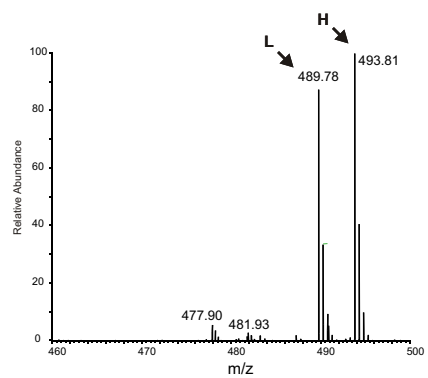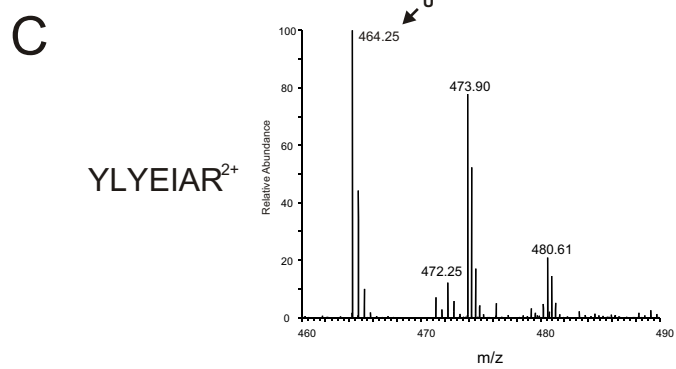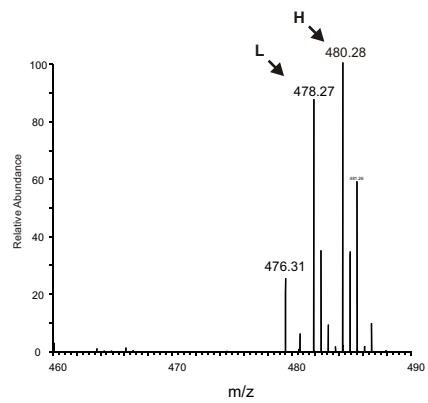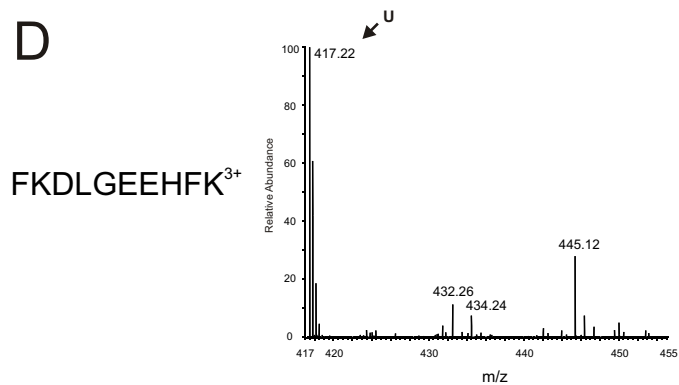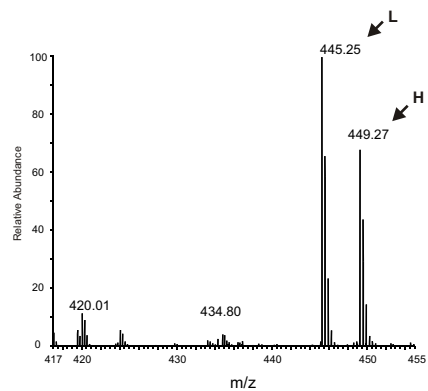

# **MASCOT** Mascot Search Results

Database : BSA (7 sequences; 1961 residues)  
 Protein hits : [BSA](#) BSA

## Probability Based Mowse Score

Ions score is  $-10 \cdot \log(P)$ , where P is the probability that the observed match is a random event. Individual ions scores  $> 1$  indicate identity or extensive homology ( $p < 0.05$ ). Protein scores are derived from ions scores as a non-probabilistic basis for ranking protein hits.

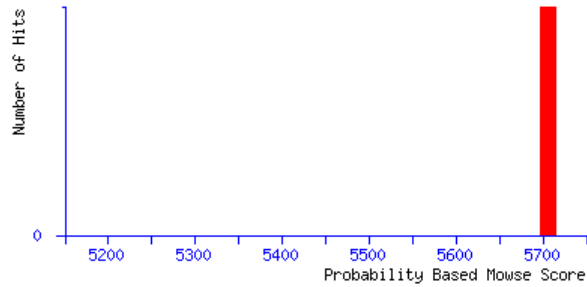

## Peptide Summary Report

Format As Peptide Summary [Help](#)

Significance threshold  $p <$   Max. number of hits

Standard scoring  MudPIT scoring  Ions score or expect cut-off  Show sub-sets

Show pop-ups  Suppress pop-ups  Sort unassigned  Require bold red

Error tolerant

1. [BSA](#) Mass: 73508 Score: 5705 Queries matched: 157 emPAI: 13.22

BSA

Check to include this hit in error tolerant search or archive report

|                                     | Query               | Observed | Mr(expt) | Mr(calc) | ppm  | Miss | Score | Expect  | Rank | Peptide                                                                   |
|-------------------------------------|---------------------|----------|----------|----------|------|------|-------|---------|------|---------------------------------------------------------------------------|
| <input checked="" type="checkbox"/> | <a href="#">141</a> | 407.7479 | 813.4812 | 813.4782 | 3.70 | 0    | (40)  | 0.00011 | 1    | <a href="#">K_GACLLPK.I</a> + Dimethyl (K); Dimethyl (N-term)             |
| <input checked="" type="checkbox"/> | <a href="#">147</a> | 411.7723 | 821.5301 | 821.5285 | 1.95 | 0    | 53    | 5e-006  | 1    | <a href="#">K_GACLLPK.I</a> + Dimethyl:2H(4) (K); Dimethyl:2H(4) (N-term) |
| <input checked="" type="checkbox"/> | <a href="#">148</a> | 411.7728 | 821.5310 | 821.5285 | 3.15 | 0    | (39)  | 0.00012 | 1    | <a href="#">K_GACLLPK.I</a> + Dimethyl:2H(4) (K); Dimethyl:2H(4) (N-term) |
| <input checked="" type="checkbox"/> | <a href="#">149</a> | 411.7730 | 821.5315 | 821.5285 | 3.73 | 0    | (39)  | 0.00012 | 1    | <a href="#">K_GACLLPK.I</a> + Dimethyl:2H(4) (K); Dimethyl:2H(4) (N-term) |

|                                     |                     |          |           |           |      |   |      |          |   |                                                                |
|-------------------------------------|---------------------|----------|-----------|-----------|------|---|------|----------|---|----------------------------------------------------------------|
| <input checked="" type="checkbox"/> | <a href="#">173</a> | 423.2715 | 844.5284  | 844.5270  | 1.72 | 0 | (40) | 0.00011  | 1 | K_LVTDLTK.V + Dimethyl (K); Dimethyl (N-term)                  |
| <input checked="" type="checkbox"/> | <a href="#">174</a> | 423.2715 | 844.5284  | 844.5270  | 1.72 | 0 | (32) | 0.00059  | 1 | K_LVTDLTK.V + Dimethyl (K); Dimethyl (N-term)                  |
| <input checked="" type="checkbox"/> | <a href="#">175</a> | 423.2717 | 844.5288  | 844.5270  | 2.16 | 0 | (45) | 3.4e-005 | 1 | K_LVTDLTK.V + Dimethyl (K); Dimethyl (N-term)                  |
| <input checked="" type="checkbox"/> | <a href="#">176</a> | 423.2719 | 844.5293  | 844.5270  | 2.81 | 0 | (47) | 2.2e-005 | 1 | K_LVTDLTK.V + Dimethyl (K); Dimethyl (N-term)                  |
| <input checked="" type="checkbox"/> | <a href="#">177</a> | 423.2720 | 844.5295  | 844.5270  | 3.02 | 0 | (47) | 2.1e-005 | 1 | K_LVTDLTK.V + Dimethyl (K); Dimethyl (N-term)                  |
| <input checked="" type="checkbox"/> | <a href="#">194</a> | 427.2967 | 852.5789  | 852.5772  | 1.99 | 0 | (39) | 0.00012  | 1 | K_LVTDLTK.V + Dimethyl:2H(4) (K); Dimethyl:2H(4) (N-term)      |
| <input checked="" type="checkbox"/> | <a href="#">195</a> | 427.2968 | 852.5790  | 852.5772  | 2.13 | 0 | (47) | 2.1e-005 | 1 | K_LVTDLTK.V + Dimethyl:2H(4) (K); Dimethyl:2H(4) (N-term)      |
| <input checked="" type="checkbox"/> | <a href="#">196</a> | 427.2968 | 852.5790  | 852.5772  | 2.13 | 0 | (30) | 0.0011   | 1 | K_LVTDLTK.V + Dimethyl:2H(4) (K); Dimethyl:2H(4) (N-term)      |
| <input checked="" type="checkbox"/> | <a href="#">197</a> | 427.2973 | 852.5800  | 852.5772  | 3.28 | 0 | 47   | 2.1e-005 | 1 | K_LVTDLTK.V + Dimethyl:2H(4) (K); Dimethyl:2H(4) (N-term)      |
| <input checked="" type="checkbox"/> | <a href="#">198</a> | 427.2976 | 852.5807  | 852.5772  | 4.07 | 0 | (36) | 0.00028  | 1 | K_LVTDLTK.V + Dimethyl:2H(4) (K); Dimethyl:2H(4) (N-term)      |
| <input checked="" type="checkbox"/> | <a href="#">289</a> | 478.2671 | 954.5197  | 954.5174  | 2.41 | 0 | (35) | 0.0003   | 1 | K_YLYEIAR.R + Dimethyl (N-term)                                |
| <input checked="" type="checkbox"/> | <a href="#">290</a> | 478.2676 | 954.5207  | 954.5174  | 3.45 | 0 | 35   | 0.0003   | 1 | K_YLYEIAR.R + Dimethyl (N-term)                                |
| <input checked="" type="checkbox"/> | <a href="#">319</a> | 481.8016 | 961.5887  | 961.5870  | 1.74 | 0 | 39   | 0.00012  | 1 | R_LCVLHEK.T + Dimethyl:2H(4) (K); Dimethyl:2H(4) (N-term)      |
| <input checked="" type="checkbox"/> | <a href="#">351</a> | 489.7799 | 977.5453  | 977.5433  | 2.03 | 0 | (54) | 4.1e-006 | 1 | K_AEFVEVTK.L + Dimethyl (K); Dimethyl (N-term)                 |
| <input checked="" type="checkbox"/> | <a href="#">352</a> | 489.7799 | 977.5453  | 977.5433  | 2.03 | 0 | (51) | 7.3e-006 | 1 | K_AEFVEVTK.L + Dimethyl (K); Dimethyl (N-term)                 |
| <input checked="" type="checkbox"/> | <a href="#">353</a> | 489.7801 | 977.5457  | 977.5433  | 2.41 | 0 | (54) | 4.4e-006 | 1 | K_AEFVEVTK.L + Dimethyl (K); Dimethyl (N-term)                 |
| <input checked="" type="checkbox"/> | <a href="#">354</a> | 489.7802 | 977.5458  | 977.5433  | 2.47 | 0 | (43) | 5.1e-005 | 1 | K_AEFVEVTK.L + Dimethyl (K); Dimethyl (N-term)                 |
| <input checked="" type="checkbox"/> | <a href="#">356</a> | 489.7807 | 977.5469  | 977.5433  | 3.66 | 0 | (29) | 0.0012   | 1 | K_AEFVEVTK.L + Dimethyl (K); Dimethyl (N-term)                 |
| <input checked="" type="checkbox"/> | <a href="#">393</a> | 493.8046 | 985.5947  | 985.5936  | 1.15 | 0 | (48) | 1.7e-005 | 1 | K_AEFVEVTK.L + Dimethyl:2H(4) (K); Dimethyl:2H(4) (N-term)     |
| <input checked="" type="checkbox"/> | <a href="#">395</a> | 493.8051 | 985.5957  | 985.5936  | 2.14 | 0 | 54   | 3.9e-006 | 1 | K_AEFVEVTK.L + Dimethyl:2H(4) (K); Dimethyl:2H(4) (N-term)     |
| <input checked="" type="checkbox"/> | <a href="#">396</a> | 493.8052 | 985.5959  | 985.5936  | 2.39 | 0 | (48) | 1.5e-005 | 1 | K_AEFVEVTK.L + Dimethyl:2H(4) (K); Dimethyl:2H(4) (N-term)     |
| <input checked="" type="checkbox"/> | <a href="#">397</a> | 493.8055 | 985.5965  | 985.5936  | 2.95 | 0 | (51) | 7.2e-006 | 1 | K_AEFVEVTK.L + Dimethyl:2H(4) (K); Dimethyl:2H(4) (N-term)     |
| <input checked="" type="checkbox"/> | <a href="#">399</a> | 493.8062 | 985.5979  | 985.5936  | 4.37 | 0 | (28) | 0.0014   | 1 | K_AEFVEVTK.L + Dimethyl:2H(4) (K); Dimethyl:2H(4) (N-term)     |
| <input checked="" type="checkbox"/> | <a href="#">500</a> | 515.7645 | 1029.5144 | 1029.5131 | 1.25 | 0 | 44   | 3.9e-005 | 1 | K_DLGEEHFK.G + Dimethyl (K); Dimethyl (N-term)                 |
| <input checked="" type="checkbox"/> | <a href="#">501</a> | 344.1788 | 1029.5145 | 1029.5131 | 1.35 | 0 | (27) | 0.0019   | 1 | K_DLGEEHFK.G + Dimethyl (K); Dimethyl (N-term)                 |
| <input checked="" type="checkbox"/> | <a href="#">555</a> | 519.7896 | 1037.5647 | 1037.5633 | 1.30 | 0 | (44) | 4e-005   | 1 | K_DLGEEHFK.G + Dimethyl:2H(4) (K); Dimethyl:2H(4) (N-term)     |
| <input checked="" type="checkbox"/> | <a href="#">556</a> | 346.8622 | 1037.5647 | 1037.5633 | 1.34 | 0 | (30) | 0.00098  | 1 | K_DLGEEHFK.G + Dimethyl:2H(4) (K); Dimethyl:2H(4) (N-term)     |
| <input checked="" type="checkbox"/> | <a href="#">645</a> | 539.8727 | 1077.7309 | 1077.7249 | 5.60 | 0 | 50   | 1.1e-005 | 1 | K_QTALVELLK.H + Dimethyl:2H(4) (K); Dimethyl:2H(4) (N-term)    |
| <input checked="" type="checkbox"/> | <a href="#">685</a> | 569.7532 | 1137.4918 | 1137.4907 | 0.98 | 0 | (47) | 2e-005   | 1 | K_CCTESLVNR.R                                                  |
| <input checked="" type="checkbox"/> | <a href="#">719</a> | 582.2941 | 1162.5736 | 1162.5692 | 3.74 | 0 | 61   | 8.3e-007 | 1 | K_EACFAVEGPK.L + Dimethyl (K); Dimethyl (N-term)               |
| <input checked="" type="checkbox"/> | <a href="#">723</a> | 583.7686 | 1165.5227 | 1165.5220 | 0.64 | 0 | 63   | 5.1e-007 | 1 | K_CCTESLVNR.R + Dimethyl (N-term)                              |
| <input checked="" type="checkbox"/> | <a href="#">724</a> | 583.7700 | 1165.5255 | 1165.5220 | 3.01 | 0 | (54) | 3.8e-006 | 1 | K_CCTESLVNR.R + Dimethyl (N-term)                              |
| <input checked="" type="checkbox"/> | <a href="#">725</a> | 583.7701 | 1165.5257 | 1165.5220 | 3.22 | 0 | (46) | 2.3e-005 | 1 | K_CCTESLVNR.R + Dimethyl (N-term)                              |
| <input checked="" type="checkbox"/> | <a href="#">733</a> | 585.7811 | 1169.5477 | 1169.5471 | 0.54 | 0 | (28) | 0.0017   | 1 | K_CCTESLVNR.R + Dimethyl:2H(4) (N-term)                        |
| <input checked="" type="checkbox"/> | <a href="#">734</a> | 585.7829 | 1169.5512 | 1169.5471 | 3.55 | 0 | (38) | 0.00017  | 1 | K_CCTESLVNR.R + Dimethyl:2H(4) (N-term)                        |
| <input checked="" type="checkbox"/> | <a href="#">735</a> | 585.7851 | 1169.5557 | 1169.5471 | 7.38 | 0 | (32) | 0.0007   | 1 | K_CCTESLVNR.R + Dimethyl:2H(4) (N-term)                        |
| <input checked="" type="checkbox"/> | <a href="#">762</a> | 598.3503 | 1194.6861 | 1194.6798 | 5.32 | 0 | (26) | 0.0026   | 1 | K_LVNELTEFAK.T + Dimethyl:2H(4) (N-term)                       |
| <input checked="" type="checkbox"/> | <a href="#">788</a> | 610.3533 | 1218.6921 | 1218.6860 | 5.05 | 0 | (40) | 0.00011  | 1 | K_LVNELTEFAK.T + Dimethyl (K); Dimethyl (N-term)               |
| <input checked="" type="checkbox"/> | <a href="#">789</a> | 610.3538 | 1218.6930 | 1218.6860 | 5.75 | 0 | 47   | 2e-005   | 1 | K_LVNELTEFAK.T + Dimethyl (K); Dimethyl (N-term)               |
| <input checked="" type="checkbox"/> | <a href="#">798</a> | 409.6089 | 1225.8048 | 1225.8009 | 3.19 | 1 | 44   | 4.1e-005 | 1 | K_QTALVELLK.H + 2 Dimethyl (K); Dimethyl (N-term)              |
| <input checked="" type="checkbox"/> | <a href="#">843</a> | 656.3776 | 1310.7406 | 1310.7347 | 4.52 | 0 | 46   | 2.5e-005 | 1 | R_HPEYAVSVLLR.L + Dimethyl (N-term)                            |
| <input checked="" type="checkbox"/> | <a href="#">856</a> | 445.2433 | 1332.7080 | 1332.7078 | 0.20 | 1 | 62   | 5.8e-007 | 1 | R_FKDLGEEHFK.G + 2 Dimethyl (K); Dimethyl (N-term)             |
| <input checked="" type="checkbox"/> | <a href="#">858</a> | 334.1849 | 1332.7106 | 1332.7078 | 2.16 | 1 | (33) | 0.00046  | 1 | R_FKDLGEEHFK.G + 2 Dimethyl (K); Dimethyl (N-term)             |
| <input checked="" type="checkbox"/> | <a href="#">871</a> | 449.2685 | 1344.7837 | 1344.7831 | 0.47 | 1 | (45) | 3.1e-005 | 1 | R_FKDLGEEHFK.G + 2 Dimethyl:2H(4) (K); Dimethyl:2H(4) (N-term) |
| <input checked="" type="checkbox"/> | <a href="#">890</a> | 681.3948 | 1360.7751 | 1360.7714 | 2.72 | 0 | (49) | 1.3e-005 | 1 | K_HLVDEPQNLK.Q + Dimethyl (K); Dimethyl (N-term)               |

|                                     |                      |          |           |           |       |   |      |          |   |                                                                              |
|-------------------------------------|----------------------|----------|-----------|-----------|-------|---|------|----------|---|------------------------------------------------------------------------------|
| <input checked="" type="checkbox"/> | <a href="#">891</a>  | 681.3965 | 1360.7785 | 1360.7714 | 5.23  | 0 | (30) | 0.001    | 1 | K_HLVDEPQNLIK.Q + Dimethyl (K); Dimethyl (N-term)                            |
| <input checked="" type="checkbox"/> | <a href="#">892</a>  | 681.3966 | 1360.7787 | 1360.7714 | 5.32  | 0 | (33) | 0.00048  | 1 | K_HLVDEPQNLIK.Q + Dimethyl (K); Dimethyl (N-term)                            |
| <input checked="" type="checkbox"/> | <a href="#">893</a>  | 681.3976 | 1360.7807 | 1360.7714 | 6.84  | 0 | 49   | 1.3e-005 | 1 | K_HLVDEPQNLIK.Q + Dimethyl (K); Dimethyl (N-term)                            |
| <input checked="" type="checkbox"/> | <a href="#">901</a>  | 685.4216 | 1368.8287 | 1368.8217 | 5.16  | 0 | (44) | 4.2e-005 | 1 | K_HLVDEPQNLIK.Q + Dimethyl:2H(4) (K); Dimethyl:2H(4) (N-term)                |
| <input checked="" type="checkbox"/> | <a href="#">902</a>  | 685.4222 | 1368.8299 | 1368.8217 | 6.05  | 0 | (34) | 0.0004   | 1 | K_HLVDEPQNLIK.Q + Dimethyl:2H(4) (K); Dimethyl:2H(4) (N-term)                |
| <input checked="" type="checkbox"/> | <a href="#">903</a>  | 685.4228 | 1368.8310 | 1368.8217 | 6.84  | 0 | (44) | 4.5e-005 | 1 | K_HLVDEPQNLIK.Q + Dimethyl:2H(4) (K); Dimethyl:2H(4) (N-term)                |
| <input checked="" type="checkbox"/> | <a href="#">935</a>  | 463.2625 | 1386.7658 | 1386.7640 | 1.28  | 0 | (34) | 0.00042  | 1 | K_ECCDKPLLEK.S + 2 Dimethyl:2H(4) (K); Dimethyl:2H(4) (N-term)               |
| <input checked="" type="checkbox"/> | <a href="#">936</a>  | 463.2626 | 1386.7659 | 1386.7640 | 1.35  | 0 | 47   | 2e-005   | 1 | K_ECCDKPLLEK.S + 2 Dimethyl:2H(4) (K); Dimethyl:2H(4) (N-term)               |
| <input checked="" type="checkbox"/> | <a href="#">966</a>  | 722.3250 | 1442.6354 | 1442.6347 | 0.42  | 0 | (68) | 1.7e-007 | 1 | K_YICDNQDTISSK.L                                                             |
| <input checked="" type="checkbox"/> | <a href="#">991</a>  | 489.9536 | 1466.8390 | 1466.8358 | 2.22  | 1 | (56) | 2.6e-006 | 1 | R_RHPEYAVSVLLR.L + Dimethyl (N-term)                                         |
| <input checked="" type="checkbox"/> | <a href="#">992</a>  | 489.9539 | 1466.8399 | 1466.8358 | 2.84  | 1 | (54) | 4e-006   | 1 | R_RHPEYAVSVLLR.L + Dimethyl (N-term)                                         |
| <input checked="" type="checkbox"/> | <a href="#">993</a>  | 489.9539 | 1466.8400 | 1466.8358 | 2.90  | 1 | 73   | 4.8e-008 | 1 | R_RHPEYAVSVLLR.L + Dimethyl (N-term)                                         |
| <input checked="" type="checkbox"/> | <a href="#">994</a>  | 489.9546 | 1466.8418 | 1466.8358 | 4.15  | 1 | (69) | 1.4e-007 | 1 | R_RHPEYAVSVLLR.L + Dimethyl (N-term)                                         |
| <input checked="" type="checkbox"/> | <a href="#">1003</a> | 736.3835 | 1470.7525 | 1470.7429 | 6.58  | 0 | 69   | 1.3e-007 | 1 | K_TVMEFVAFVVK.C + Dimethyl (K); Dimethyl (N-term); Oxidation (M)             |
| <input checked="" type="checkbox"/> | <a href="#">1004</a> | 491.2952 | 1470.8637 | 1470.8609 | 1.94  | 1 | (33) | 0.00049  | 1 | R_RHPEYAVSVLLR.L + Dimethyl:2H(4) (N-term)                                   |
| <input checked="" type="checkbox"/> | <a href="#">1005</a> | 491.2955 | 1470.8647 | 1470.8609 | 2.62  | 1 | (41) | 8.5e-005 | 1 | R_RHPEYAVSVLLR.L + Dimethyl:2H(4) (N-term)                                   |
| <input checked="" type="checkbox"/> | <a href="#">1014</a> | 738.3531 | 1474.6917 | 1474.6912 | 0.39  | 0 | (65) | 2.9e-007 | 1 | K_YICDNQDTISSK.L + Dimethyl:2H(4) (N-term)                                   |
| <input checked="" type="checkbox"/> | <a href="#">1015</a> | 492.5912 | 1474.7516 | 1474.7490 | 1.79  | 0 | (42) | 6.5e-005 | 1 | K_SLHTLFGDELCK.V + Dimethyl (K); Dimethyl (N-term)                           |
| <input checked="" type="checkbox"/> | <a href="#">1016</a> | 492.5927 | 1474.7562 | 1474.7490 | 4.90  | 0 | (33) | 0.00053  | 1 | K_SLHTLFGDELCK.V + Dimethyl (K); Dimethyl (N-term)                           |
| <input checked="" type="checkbox"/> | <a href="#">1018</a> | 738.3861 | 1474.7577 | 1474.7490 | 5.88  | 0 | (59) | 1.2e-006 | 1 | K_SLHTLFGDELCK.V + Dimethyl (K); Dimethyl (N-term)                           |
| <input checked="" type="checkbox"/> | <a href="#">1019</a> | 738.3862 | 1474.7578 | 1474.7490 | 5.96  | 0 | (52) | 6.3e-006 | 1 | K_SLHTLFGDELCK.V + Dimethyl (K); Dimethyl (N-term)                           |
| <input checked="" type="checkbox"/> | <a href="#">1030</a> | 740.4084 | 1478.8023 | 1478.7931 | 6.26  | 0 | (56) | 2.3e-006 | 1 | K_TVMEFVAFVVK.C + Dimethyl:2H(4) (K); Dimethyl:2H(4) (N-term); Oxidation (M) |
| <input checked="" type="checkbox"/> | <a href="#">1034</a> | 495.2753 | 1482.8042 | 1482.7992 | 3.33  | 0 | (35) | 0.00035  | 1 | K_SLHTLFGDELCK.V + Dimethyl:2H(4) (K); Dimethyl:2H(4) (N-term)               |
| <input checked="" type="checkbox"/> | <a href="#">1035</a> | 495.2760 | 1482.8063 | 1482.7992 | 4.75  | 0 | (32) | 0.0006   | 1 | K_SLHTLFGDELCK.V + Dimethyl:2H(4) (K); Dimethyl:2H(4) (N-term)               |
| <input checked="" type="checkbox"/> | <a href="#">1036</a> | 742.4109 | 1482.8073 | 1482.7992 | 5.48  | 0 | (38) | 0.00015  | 1 | K_SLHTLFGDELCK.V + Dimethyl:2H(4) (K); Dimethyl:2H(4) (N-term)               |
| <input checked="" type="checkbox"/> | <a href="#">1037</a> | 742.4119 | 1482.8093 | 1482.7992 | 6.80  | 0 | 65   | 2.9e-007 | 1 | K_SLHTLFGDELCK.V + Dimethyl:2H(4) (K); Dimethyl:2H(4) (N-term)               |
| <input checked="" type="checkbox"/> | <a href="#">1052</a> | 750.3567 | 1498.6988 | 1498.6973 | 0.99  | 0 | (67) | 1.9e-007 | 1 | K_YICDNQDTISSK.L + Dimethyl (K); Dimethyl (N-term)                           |
| <input checked="" type="checkbox"/> | <a href="#">1053</a> | 750.3571 | 1498.6997 | 1498.6973 | 1.59  | 0 | (61) | 8e-007   | 1 | K_YICDNQDTISSK.L + Dimethyl (K); Dimethyl (N-term)                           |
| <input checked="" type="checkbox"/> | <a href="#">1054</a> | 750.3579 | 1498.7013 | 1498.6973 | 2.62  | 0 | (67) | 2.2e-007 | 1 | K_YICDNQDTISSK.L + Dimethyl (K); Dimethyl (N-term)                           |
| <input checked="" type="checkbox"/> | <a href="#">1055</a> | 750.3588 | 1498.7031 | 1498.6973 | 3.84  | 0 | (60) | 1e-006   | 1 | K_YICDNQDTISSK.L + Dimethyl (K); Dimethyl (N-term)                           |
| <input checked="" type="checkbox"/> | <a href="#">1056</a> | 750.3610 | 1498.7075 | 1498.6973 | 6.77  | 0 | (67) | 2e-007   | 1 | K_YICDNQDTISSK.L + Dimethyl (K); Dimethyl (N-term)                           |
| <input checked="" type="checkbox"/> | <a href="#">1077</a> | 754.3813 | 1506.7481 | 1506.7476 | 0.38  | 0 | (70) | 1e-007   | 1 | K_YICDNQDTISSK.L + Dimethyl:2H(4) (K); Dimethyl:2H(4) (N-term)               |
| <input checked="" type="checkbox"/> | <a href="#">1078</a> | 754.3828 | 1506.7511 | 1506.7476 | 2.32  | 0 | (71) | 7.3e-008 | 1 | K_YICDNQDTISSK.L + Dimethyl:2H(4) (K); Dimethyl:2H(4) (N-term)               |
| <input checked="" type="checkbox"/> | <a href="#">1079</a> | 754.3835 | 1506.7525 | 1506.7476 | 3.29  | 0 | 76   | 2.4e-008 | 1 | K_YICDNQDTISSK.L + Dimethyl:2H(4) (K); Dimethyl:2H(4) (N-term)               |
| <input checked="" type="checkbox"/> | <a href="#">1080</a> | 754.3841 | 1506.7537 | 1506.7476 | 4.08  | 0 | (46) | 2.4e-005 | 1 | K_YICDNQDTISSK.L + Dimethyl:2H(4) (K); Dimethyl:2H(4) (N-term)               |
| <input checked="" type="checkbox"/> | <a href="#">1081</a> | 754.3863 | 1506.7580 | 1506.7476 | 6.94  | 0 | (72) | 7e-008   | 1 | K_YICDNQDTISSK.L + Dimethyl:2H(4) (K); Dimethyl:2H(4) (N-term)               |
| <input checked="" type="checkbox"/> | <a href="#">1083</a> | 754.4207 | 1506.8268 | 1506.8194 | 4.85  | 0 | (45) | 3.1e-005 | 1 | K_LGEYGFQNALIVR.Y + Dimethyl (N-term)                                        |
| <input checked="" type="checkbox"/> | <a href="#">1084</a> | 754.4216 | 1506.8287 | 1506.8194 | 6.16  | 0 | (74) | 4.4e-008 | 1 | K_LGEYGFQNALIVR.Y + Dimethyl (N-term)                                        |
| <input checked="" type="checkbox"/> | <a href="#">1085</a> | 754.4221 | 1506.8297 | 1506.8194 | 6.82  | 0 | 110  | 1.1e-011 | 1 | K_LGEYGFQNALIVR.Y + Dimethyl (N-term)                                        |
| <input checked="" type="checkbox"/> | <a href="#">1100</a> | 756.4345 | 1510.8545 | 1510.8446 | 6.56  | 0 | (73) | 5e-008   | 1 | K_LGEYGFQNALIVR.Y + Dimethyl:2H(4) (N-term)                                  |
| <input checked="" type="checkbox"/> | <a href="#">1101</a> | 756.4345 | 1510.8545 | 1510.8446 | 6.56  | 0 | (86) | 2.5e-009 | 1 | K_LGEYGFQNALIVR.Y + Dimethyl:2H(4) (N-term)                                  |
| <input checked="" type="checkbox"/> | <a href="#">1102</a> | 756.4359 | 1510.8573 | 1510.8446 | 8.41  | 0 | (68) | 1.5e-007 | 1 | K_LGEYGFQNALIVR.Y + Dimethyl:2H(4) (N-term)                                  |
| <input checked="" type="checkbox"/> | <a href="#">1122</a> | 507.2230 | 1518.6471 | 1518.6443 | 1.83  | 0 | (49) | 1.2e-005 | 1 | K_TCVADESHAGCEK.S + Dimethyl (K); Dimethyl (N-term)                          |
| <input checked="" type="checkbox"/> | <a href="#">1160</a> | 509.9051 | 1526.6936 | 1526.6945 | -0.58 | 0 | 67   | 2.1e-007 | 1 | K_TCVADESHAGCEK.S + Dimethyl:2H(4) (K); Dimethyl:2H(4) (N-term)              |
| <input checked="" type="checkbox"/> | <a href="#">1189</a> | 767.7972 | 1533.5798 | 1533.5786 | 0.82  | 0 | (31) | 0.00083  | 1 | R_ETYGDMADCEK.Q + Dimethyl (K); Dimethyl (N-term)                            |

|   |                      |          |           |           |       |   |      |          |   |                                                                                            |
|---|----------------------|----------|-----------|-----------|-------|---|------|----------|---|--------------------------------------------------------------------------------------------|
| ✓ | <a href="#">1190</a> | 767.7979 | 1533.5812 | 1533.5786 | 1.70  | 0 | (59) | 1.1e-006 | 1 | R_ETYGDMADCC <del>CK</del> .Q + Dimethyl (K); Dimethyl (N-term)                            |
| ✓ | <a href="#">1191</a> | 512.2012 | 1533.5819 | 1533.5786 | 2.16  | 0 | (31) | 0.00071  | 1 | R_ETYGDMADCC <del>CK</del> .Q + Dimethyl (K); Dimethyl (N-term)                            |
| ✓ | <a href="#">1225</a> | 770.4440 | 1538.8735 | 1538.8668 | 4.34  | 0 | 36   | 0.00024  | 1 | K_VPQVSTPTLVEVSR.S + Dimethyl (N-term)                                                     |
| ✓ | <a href="#">1239</a> | 771.8224 | 1541.6303 | 1541.6288 | 1.01  | 0 | (59) | 1.3e-006 | 1 | R_ETYGDMADCC <del>CK</del> .Q + Dimethyl:2H(4) (K); Dimethyl:2H(4) (N-term)                |
| ✓ | <a href="#">1240</a> | 771.8226 | 1541.6307 | 1541.6288 | 1.26  | 0 | (44) | 4.1e-005 | 1 | R_ETYGDMADCC <del>CK</del> .Q + Dimethyl:2H(4) (K); Dimethyl:2H(4) (N-term)                |
| ✓ | <a href="#">1241</a> | 771.8234 | 1541.6322 | 1541.6288 | 2.20  | 0 | 77   | 2.2e-008 | 1 | R_ETYGDMADCC <del>CK</del> .Q + Dimethyl:2H(4) (K); Dimethyl:2H(4) (N-term)                |
| ✓ | <a href="#">1271</a> | 775.7966 | 1549.5786 | 1549.5735 | 3.30  | 0 | (36) | 0.00023  | 1 | R_ETYGDMADCC <del>CK</del> .Q + Dimethyl (K); Dimethyl (N-term); Oxidation (M)             |
| ✓ | <a href="#">1288</a> | 779.8191 | 1557.6237 | 1557.6237 | 0.01  | 0 | (56) | 2.8e-006 | 1 | R_ETYGDMADCC <del>CK</del> .Q + Dimethyl:2H(4) (K); Dimethyl:2H(4) (N-term); Oxidation (M) |
| ✓ | <a href="#">1289</a> | 779.8215 | 1557.6285 | 1557.6237 | 3.09  | 0 | (43) | 5.4e-005 | 1 | R_ETYGDMADCC <del>CK</del> .Q + Dimethyl:2H(4) (K); Dimethyl:2H(4) (N-term); Oxidation (M) |
| ✓ | <a href="#">1290</a> | 779.8444 | 1557.6743 | 1557.6691 | 3.36  | 0 | 56   | 2.4e-006 | 1 | K_EYEATLECC <del>CAK</del> .D + Dimethyl (K); Dimethyl (N-term)                            |
| ✓ | <a href="#">1304</a> | 783.8691 | 1565.7236 | 1565.7193 | 2.76  | 0 | (54) | 4.1e-006 | 1 | K_EYEATLECC <del>CAK</del> .D + Dimethyl:2H(4) (K); Dimethyl:2H(4) (N-term)                |
| ✓ | <a href="#">1338</a> | 798.3956 | 1594.7767 | 1594.7667 | 6.26  | 0 | 82   | 5.9e-009 | 1 | K_DAF <del>LG</del> SFLYEYSR.R + Dimethyl (N-term)                                         |
| ✓ | <a href="#">1343</a> | 800.4080 | 1598.8014 | 1598.7919 | 5.95  | 0 | (75) | 3.1e-008 | 1 | K_DAF <del>LG</del> SFLYEYSR.R + Dimethyl:2H(4) (N-term)                                   |
| ✓ | <a href="#">1347</a> | 537.5796 | 1609.7169 | 1609.7083 | 5.39  | 0 | (41) | 8e-005   | 1 | K_DDPHACYSTVFD <del>K</del> .L + Dimethyl (K); Dimethyl (N-term)                           |
| ✓ | <a href="#">1359</a> | 540.2629 | 1617.7670 | 1617.7585 | 5.25  | 0 | 46   | 2.7e-005 | 1 | K_DDPHACYSTVFD <del>K</del> .L + Dimethyl:2H(4) (K); Dimethyl:2H(4) (N-term)               |
| ✓ | <a href="#">1380</a> | 411.9836 | 1643.9053 | 1643.8990 | 3.86  | 1 | 27   | 0.0022   | 1 | K_LKECCDK <del>PLLEK</del> .S + 3 Dimethyl (K); Dimethyl (N-term)                          |
| ✓ | <a href="#">1463</a> | 566.0049 | 1694.9927 | 1694.9931 | -0.21 | 1 | (28) | 0.0017   | 1 | R_KVPQVSTPTLVEVSR.S + Dimethyl (K); Dimethyl (N-term)                                      |
| ✓ | <a href="#">1464</a> | 566.0075 | 1695.0007 | 1694.9931 | 4.51  | 1 | (36) | 0.00028  | 1 | R_KVPQVSTPTLVEVSR.S + Dimethyl (K); Dimethyl (N-term)                                      |
| ✓ | <a href="#">1465</a> | 566.0080 | 1695.0022 | 1694.9931 | 5.36  | 1 | 54   | 4.2e-006 | 1 | R_KVPQVSTPTLVEVSR.S + Dimethyl (K); Dimethyl (N-term)                                      |
| ✓ | <a href="#">1485</a> | 568.6872 | 1703.0397 | 1703.0433 | -2.10 | 1 | (50) | 9e-006   | 1 | R_KVPQVSTPTLVEVSR.S + Dimethyl:2H(4) (K); Dimethyl:2H(4) (N-term)                          |
| ✓ | <a href="#">1486</a> | 568.6914 | 1703.0524 | 1703.0433 | 5.34  | 1 | (39) | 0.00012  | 1 | R_KVPQVSTPTLVEVSR.S + Dimethyl:2H(4) (K); Dimethyl:2H(4) (N-term)                          |
| ✓ | <a href="#">1527</a> | 433.2145 | 1728.8288 | 1728.8253 | 2.01  | 1 | 30   | 0.00096  | 1 | K_QEPERNECFLSH <del>K</del> .D + Dimethyl (K); Dimethyl (N-term)                           |
| ✓ | <a href="#">1585</a> | 884.9406 | 1767.8667 | 1767.8535 | 7.47  | 0 | 92   | 5.9e-010 | 1 | R_MPCTEDYLSLILNR.L + Dimethyl (N-term); Oxidation (M)                                      |
| ✓ | <a href="#">1590</a> | 593.2371 | 1776.6895 | 1776.6866 | 1.68  | 0 | (57) | 2.2e-006 | 1 | K_ECCHGD <del>LLE</del> CADDR.A + Dimethyl (N-term)                                        |
| ✓ | <a href="#">1591</a> | 593.2372 | 1776.6897 | 1776.6866 | 1.78  | 0 | 76   | 2.7e-008 | 1 | K_ECCHGD <del>LLE</del> CADDR.A + Dimethyl (N-term)                                        |
| ✓ | <a href="#">1598</a> | 594.5789 | 1780.7149 | 1780.7117 | 1.83  | 0 | (42) | 7e-005   | 1 | K_ECCHGD <del>LLE</del> CADDR.A + Dimethyl:2H(4) (N-term)                                  |
| ✓ | <a href="#">1599</a> | 594.5792 | 1780.7157 | 1780.7117 | 2.27  | 0 | (30) | 0.0011   | 1 | K_ECCHGD <del>LLE</del> CADDR.A + Dimethyl:2H(4) (N-term)                                  |
| ✓ | <a href="#">1615</a> | 902.3893 | 1802.7640 | 1802.7604 | 2.03  | 0 | (53) | 5.4e-006 | 1 | K_YNGVFQ <del>ECCQAEDK</del> .G + Dimethyl (K); Dimethyl (N-term)                          |
| ✓ | <a href="#">1616</a> | 601.9293 | 1802.7660 | 1802.7604 | 3.10  | 0 | (48) | 1.5e-005 | 1 | K_YNGVFQ <del>ECCQAEDK</del> .G + Dimethyl (K); Dimethyl (N-term)                          |
| ✓ | <a href="#">1617</a> | 601.9295 | 1802.7667 | 1802.7604 | 3.53  | 0 | (50) | 1.1e-005 | 1 | K_YNGVFQ <del>ECCQAEDK</del> .G + Dimethyl (K); Dimethyl (N-term)                          |
| ✓ | <a href="#">1618</a> | 601.9297 | 1802.7672 | 1802.7604 | 3.81  | 0 | (55) | 3.2e-006 | 1 | K_YNGVFQ <del>ECCQAEDK</del> .G + Dimethyl (K); Dimethyl (N-term)                          |
| ✓ | <a href="#">1619</a> | 601.9298 | 1802.7677 | 1802.7604 | 4.08  | 0 | (41) | 8.5e-005 | 1 | K_YNGVFQ <del>ECCQAEDK</del> .G + Dimethyl (K); Dimethyl (N-term)                          |
| ✓ | <a href="#">1620</a> | 601.9299 | 1802.7680 | 1802.7604 | 4.22  | 0 | (38) | 0.00015  | 1 | K_YNGVFQ <del>ECCQAEDK</del> .G + Dimethyl (K); Dimethyl (N-term)                          |
| ✓ | <a href="#">1621</a> | 902.3916 | 1802.7687 | 1802.7604 | 4.60  | 0 | (51) | 8.4e-006 | 1 | K_YNGVFQ <del>ECCQAEDK</del> .G + Dimethyl (K); Dimethyl (N-term)                          |
| ✓ | <a href="#">1622</a> | 902.3916 | 1802.7687 | 1802.7604 | 4.64  | 0 | (52) | 5.6e-006 | 1 | K_YNGVFQ <del>ECCQAEDK</del> .G + Dimethyl (K); Dimethyl (N-term)                          |
| ✓ | <a href="#">1623</a> | 902.3917 | 1802.7688 | 1802.7604 | 4.67  | 0 | (59) | 1.1e-006 | 1 | K_YNGVFQ <del>ECCQAEDK</del> .G + Dimethyl (K); Dimethyl (N-term)                          |
| ✓ | <a href="#">1624</a> | 902.3921 | 1802.7696 | 1802.7604 | 5.10  | 0 | 79   | 1.3e-008 | 1 | K_YNGVFQ <del>ECCQAEDK</del> .G + Dimethyl (K); Dimethyl (N-term)                          |
| ✓ | <a href="#">1625</a> | 902.3921 | 1802.7697 | 1802.7604 | 5.19  | 0 | (59) | 1.2e-006 | 1 | K_YNGVFQ <del>ECCQAEDK</del> .G + Dimethyl (K); Dimethyl (N-term)                          |
| ✓ | <a href="#">1626</a> | 902.3921 | 1802.7697 | 1802.7604 | 5.19  | 0 | (72) | 5.7e-008 | 1 | K_YNGVFQ <del>ECCQAEDK</del> .G + Dimethyl (K); Dimethyl (N-term)                          |
| ✓ | <a href="#">1646</a> | 604.6125 | 1810.8157 | 1810.8106 | 2.83  | 0 | (41) | 8.1e-005 | 1 | K_YNGVFQ <del>ECCQAEDK</del> .G + Dimethyl:2H(4) (K); Dimethyl:2H(4) (N-term)              |
| ✓ | <a href="#">1647</a> | 604.6128 | 1810.8166 | 1810.8106 | 3.29  | 0 | (47) | 2.2e-005 | 1 | K_YNGVFQ <del>ECCQAEDK</del> .G + Dimethyl:2H(4) (K); Dimethyl:2H(4) (N-term)              |
| ✓ | <a href="#">1648</a> | 604.6129 | 1810.8169 | 1810.8106 | 3.49  | 0 | (47) | 2.2e-005 | 1 | K_YNGVFQ <del>ECCQAEDK</del> .G + Dimethyl:2H(4) (K); Dimethyl:2H(4) (N-term)              |
| ✓ | <a href="#">1649</a> | 604.6133 | 1810.8180 | 1810.8106 | 4.10  | 0 | (45) | 3e-005   | 1 | K_YNGVFQ <del>ECCQAEDK</del> .G + Dimethyl:2H(4) (K); Dimethyl:2H(4) (N-term)              |
| ✓ | <a href="#">1650</a> | 906.4168 | 1810.8191 | 1810.8106 | 4.68  | 0 | (63) | 5.4e-007 | 1 | K_YNGVFQ <del>ECCQAEDK</del> .G + Dimethyl:2H(4) (K); Dimethyl:2H(4) (N-term)              |
| ✓ | <a href="#">1651</a> | 906.4171 | 1810.8196 | 1810.8106 | 4.95  | 0 | (77) | 1.8e-008 | 1 | K_YNGVFQ <del>ECCQAEDK</del> .G + Dimethyl:2H(4) (K); Dimethyl:2H(4) (N-term)              |

|                                     |                      |          |           |           |       |   |      |          |   |                                                                                    |
|-------------------------------------|----------------------|----------|-----------|-----------|-------|---|------|----------|---|------------------------------------------------------------------------------------|
| <input checked="" type="checkbox"/> | <a href="#">1652</a> | 906.4171 | 1810.8197 | 1810.8106 | 5.01  | 0 | (65) | 3.3e-007 | 1 | K_YNGVVFQECQAEDK.G + Dimethyl:2H(4) (K); Dimethyl:2H(4) (N-term)                   |
| <input checked="" type="checkbox"/> | <a href="#">1653</a> | 906.4171 | 1810.8197 | 1810.8106 | 5.04  | 0 | (63) | 5.5e-007 | 1 | K_YNGVVFQECQAEDK.G + Dimethyl:2H(4) (K); Dimethyl:2H(4) (N-term)                   |
| <input checked="" type="checkbox"/> | <a href="#">1654</a> | 906.4172 | 1810.8199 | 1810.8106 | 5.15  | 0 | (63) | 4.6e-007 | 1 | K_YNGVVFQECQAEDK.G + Dimethyl:2H(4) (K); Dimethyl:2H(4) (N-term)                   |
| <input checked="" type="checkbox"/> | <a href="#">1655</a> | 906.4176 | 1810.8207 | 1810.8106 | 5.59  | 0 | (69) | 1.4e-007 | 1 | K_YNGVVFQECQAEDK.G + Dimethyl:2H(4) (K); Dimethyl:2H(4) (N-term)                   |
| <input checked="" type="checkbox"/> | <a href="#">1711</a> | 646.3357 | 1935.9853 | 1935.9764 | 4.56  | 0 | (37) | 0.0002   | 1 | R_RPCFSALTPDETYVPK.A + Dimethyl (K); Dimethyl (N-term)                             |
| <input checked="" type="checkbox"/> | <a href="#">1714</a> | 646.3372 | 1935.9898 | 1935.9764 | 6.92  | 0 | (35) | 0.00032  | 1 | R_RPCFSALTPDETYVPK.A + Dimethyl (K); Dimethyl (N-term)                             |
| <input checked="" type="checkbox"/> | <a href="#">1721</a> | 649.0204 | 1944.0393 | 1944.0267 | 6.51  | 0 | 42   | 6.4e-005 | 1 | R_RPCFSALTPDETYVPK.A + Dimethyl:2H(4) (K); Dimethyl:2H(4) (N-term)                 |
| <input checked="" type="checkbox"/> | <a href="#">1737</a> | 655.3337 | 1962.9792 | 1962.9761 | 1.58  | 0 | 49   | 1.2e-005 | 1 | K_LFTFHADICTLPDTEK.Q + Dimethyl (K); Dimethyl (N-term)                             |
| <input checked="" type="checkbox"/> | <a href="#">1738</a> | 655.3358 | 1962.9856 | 1962.9761 | 4.84  | 0 | (30) | 0.001    | 1 | K_LFTFHADICTLPDTEK.Q + Dimethyl (K); Dimethyl (N-term)                             |
| <input checked="" type="checkbox"/> | <a href="#">1739</a> | 655.3359 | 1962.9858 | 1962.9761 | 4.94  | 0 | (35) | 0.00029  | 1 | K_LFTFHADICTLPDTEK.Q + Dimethyl (K); Dimethyl (N-term)                             |
| <input checked="" type="checkbox"/> | <a href="#">1776</a> | 658.0196 | 1971.0369 | 1971.0263 | 5.38  | 0 | (36) | 0.00028  | 1 | K_LFTFHADICTLPDTEK.Q + Dimethyl:2H(4) (K); Dimethyl:2H(4) (N-term)                 |
| <input checked="" type="checkbox"/> | <a href="#">1843</a> | 671.3062 | 2010.8968 | 2010.8849 | 5.92  | 1 | 46   | 2.3e-005 | 1 | K_CCAADKKEACFAVEGPK.L + 2 Dimethyl (K); Dimethyl (N-term)                          |
| <input checked="" type="checkbox"/> | <a href="#">1845</a> | 675.3312 | 2022.9719 | 2022.9603 | 5.75  | 1 | (32) | 0.00065  | 1 | K_CCAADKKEACFAVEGPK.L + 2 Dimethyl:2H(4) (K); Dimethyl:2H(4) (N-term)              |
| <input checked="" type="checkbox"/> | <a href="#">1878</a> | 533.7814 | 2131.0966 | 2131.0871 | 4.48  | 1 | 27   | 0.0019   | 1 | K_LKPDPTLCLDEFKADEK.K + 3 Dimethyl (K); Dimethyl (N-term)                          |
| <input checked="" type="checkbox"/> | <a href="#">1891</a> | 543.2455 | 2168.9527 | 2168.9401 | 5.80  | 1 | 41   | 8.5e-005 | 1 | K_VHKECCHGDLLECADDR.A + Dimethyl (K); Dimethyl (N-term)                            |
| <input checked="" type="checkbox"/> | <a href="#">1898</a> | 544.2455 | 2172.9527 | 2172.9653 | -5.77 | 1 | (32) | 0.00065  | 1 | K_VHKECCHGDLLECADDR.A + Dimethyl (N-term); Dimethyl:2H(4) (K)                      |
| <input checked="" type="checkbox"/> | <a href="#">1914</a> | 730.6315 | 2188.8728 | 2188.8711 | 0.76  | 1 | 44   | 4e-005   | 1 | R_ETYGDMADCCEKQEPER.N + Dimethyl (K); Dimethyl (N-term); Oxidation (M)             |
| <input checked="" type="checkbox"/> | <a href="#">1921</a> | 733.3138 | 2196.9195 | 2196.9213 | -0.83 | 1 | (39) | 0.00013  | 1 | R_ETYGDMADCCEKQEPER.N + Dimethyl:2H(4) (K); Dimethyl:2H(4) (N-term); Oxidation (M) |

## Search Parameters

Type of search : MS/MS Ion Search  
 Enzyme : Trypsin  
 Fixed modifications : Carbamidomethyl (C)  
 Variable modifications : Dimethyl (K),Dimethyl (N-term),Dimethyl:2H(4) (K),Dimethyl:2H(4) (N-term),Oxidation (M)  
 Mass values : Monoisotopic  
 Protein Mass : Unrestricted  
 Peptide Mass Tolerance : ± 10 ppm  
 Fragment Mass Tolerance: ± 0.9 Da  
  
 Instrument type : Default  
 Number of queries : 1992

## **Mascot Search Results**

Database : IPI\_mouse mouse\_v3.36 (51326 sequences; 23682061 residues)

Protein hits : [IPI00874482](#) Tax\_Id=10090 Gene\_Symbol=Actg1 Actin, cytoplasmic 2  
[IPI00405227](#) Tax\_Id=10090 Gene\_Symbol=Vcl Vinculin  
[IPI00131695](#) Tax\_Id=10090 Gene\_Symbol=Alb Serum albumin precursor  
[IPI00131830](#) Tax\_Id=10090 Gene\_Symbol=Serpina3k Serine protease inhibitor A3K precursor  
[IPI00465786](#) Tax\_Id=10090 Gene\_Symbol=Tln1 Talin-1  
[IPI00136929](#) Tax\_Id=10090 Gene\_Symbol=Actg1 Gamma actin-like protein  
[IPI00114375](#) Tax\_Id=10090 Gene\_Symbol=Dpysl2 Dihydropyrimidinase-related protein 2  
[IPI00405058](#) Tax\_Id=10090 Gene\_Symbol=Hnrnpa2b1 Isoform 3 of Heterogeneous nuclear ribonucleoproteins A2/B1  
[IPI00128642](#) Tax\_Id=10090 Gene\_Symbol=Cbr2 Lung carbonyl reductase  
[IPI00229080](#) Tax\_Id=10090 Gene\_Symbol=Hsp90ab1 Heat shock protein 84b  
[IPI00554929](#) Tax\_Id=10090 Gene\_Symbol=Hsp90ab1 Heat shock protein HSP 90-beta  
[IPI00132722](#) Tax\_Id=10090 Gene\_Symbol=Anxa3 Annexin A3  
[IPI00323357](#) Tax\_Id=10090 Gene\_Symbol=Hspa8 Heat shock cognate 71 kDa protein  
[IPI00135284](#) Tax\_Id=10090 Gene\_Symbol=LOC100044454;LOC100039214 similar to Glyceraldehyde-3-phosphate dehydrogenase (GAPDH) isoform 1  
[IPI00123313](#) Tax\_Id=10090 Gene\_Symbol=Ubely1;Ubelx Ubiquitin-activating enzyme E1 X  
[IPI00221402](#) Tax\_Id=10090 Gene\_Symbol=Aldoa Fructose-bisphosphate aldolase A  
[IPI00330804](#) Tax\_Id=10090 Gene\_Symbol=Hsp90aa1 Heat shock protein HSP 90-alpha  
[IPI00135635](#) Tax\_Id=10090 Gene\_Symbol=Serpina3m Serine protease inhibitor A3M precursor  
[IPI00317309](#) Tax\_Id=10090 Gene\_Symbol=Anxa5 Annexin A5  
[IPI00387422](#) Tax\_Id=10090 Gene\_Symbol=Zyx zyxin  
[IPI00553333](#) Tax\_Id=10090 Gene\_Symbol=Hbb-b1 Hemoglobin subunit beta-1  
[IPI00113223](#) Tax\_Id=10090 Gene\_Symbol=Fasn Fatty acid synthase  
[IPI00221528](#) Tax\_Id=10090 Gene\_Symbol=4732495G21Rik 10 days neonate skin cDNA, RIKEN full-length enriched library, clone:4732493G14 product:ACTIN, CYTOP.  
[IPI00123924](#) Tax\_Id=10090 Gene\_Symbol=Serpinald Alpha-1-antitrypsin 1-4 precursor  
[IPI00469114](#) Tax\_Id=10090 Gene\_Symbol=Hba-a1;Hba-a2 Hemoglobin subunit alpha  
[IPI00169463](#) Tax\_Id=10090 Gene\_Symbol=Tubb2c Tubulin beta-2C chain  
[IPI00169916](#) Tax\_Id=10090 Gene\_Symbol=Cltc Clathrin heavy chain  
[IPI00131138](#) Tax\_Id=10090 Gene\_Symbol=Flna Isoform 1 of Filamin-A  
[IPI00380873](#) Tax\_Id=10090 Gene\_Symbol=Sec14l3 Novel protein, ortholog of human and rat SEC14-like 3 (S. cerevisiae) SEC14L3  
[IPI00110753](#) Tax\_Id=10090 Gene\_Symbol=Tuba1a Tubulin alpha-1A chain  
[IPI00117352](#) Tax\_Id=10090 Gene\_Symbol=Tubb5 Tubulin beta-5 chain  
[IPI00624663](#) Tax\_Id=10090 Gene\_Symbol=Pzp Alpha-2-macroglobulin precursor  
[IPI00622235](#) Tax\_Id=10090 Gene\_Symbol=Vcp Transitional endoplasmic reticulum ATPase  
[IPI00230395](#) Tax\_Id=10090 Gene\_Symbol=Anxa1 Annexin A1  
[IPI00139788](#) Tax\_Id=10090 Gene\_Symbol=Trf Serotransferrin precursor  
[IPI00109073](#) Tax\_Id=10090 Gene\_Symbol=Tubb4 Tubulin beta-4 chain  
[IPI00316491](#) Tax\_Id=10090 Gene\_Symbol=Hbb-b2 Hemoglobin subunit beta-2  
[IPI00117857](#) Tax\_Id=10090 Gene\_Symbol=Spi1-6 Alpha-1-antitrypsin 1-6 precursor  
[IPI00318614](#) Tax\_Id=10090 Gene\_Symbol=Idh2 Isocitrate dehydrogenase [NADP], mitochondrial precursor  
[IPI00323816](#) Tax\_Id=10090 Gene\_Symbol=Selenbp2 Selenium-binding protein 2  
[IPI00323592](#) Tax\_Id=10090 Gene\_Symbol=Mdh2 Malate dehydrogenase, mitochondrial precursor  
[IPI00127560](#) Tax\_Id=10090 Gene\_Symbol=Ttr Transthyretin precursor

[IPI00555069](#) Tax\_Id=10090 Gene\_Symbol=Pgk1 Phosphoglycerate kinase 1  
[IPI00132762](#) Tax\_Id=10090 Gene\_Symbol=Trap1 Heat shock protein 75 kDa, mitochondrial precursor  
[IPI00128249](#) Tax\_Id=10090 Gene\_Symbol=Ahsg Alpha-2-HS-glycoprotein precursor  
[IPI00126248](#) Tax\_Id=10090 Gene\_Symbol=Acly Adult male testis cDNA, RIKEN full-length enriched library, clone:4922505F07 product:ATP citrate lyase, full  
[IPI00830223](#) Tax\_Id=10090 Gene\_Symbol=Tpm1 28 kDa protein  
[IPI00648086](#) Tax\_Id=10090 Gene\_Symbol=Laspl LIM and SH3 protein 1  
[IPI00121209](#) Tax\_Id=10090 Gene\_Symbol=Apoal Apolipoprotein A-I precursor  
[IPI00555059](#) Tax\_Id=10090 Gene\_Symbol=Prdx6 Peroxiredoxin-6  
[IPI00336324](#) Tax\_Id=10090 Gene\_Symbol=Mdh1 Malate dehydrogenase, cytoplasmic  
[IPI00323624](#) Tax\_Id=10090 Gene\_Symbol=C3 Isoform Long of Complement C3 precursor (Fragment)  
[IPI00355382](#) Tax\_Id=10090 Gene\_Symbol=Wars Isoform 2 of Tryptophanyl-tRNA synthetase, cytoplasmic  
[IPI00318671](#) Tax\_Id=10090 Gene\_Symbol=Ehd4 EH-domain containing 4-KJR (Fragment)  
[IPI00380436](#) Tax\_Id=10090 Gene\_Symbol=Actn1 Alpha-actinin-1  
[IPI00136906](#) Tax\_Id=10090 Gene\_Symbol=Capg Macrophage-capping protein  
[IPI00123223](#) Tax\_Id=10090 Gene\_Symbol=Mug1 Murinoglobulin-1 precursor  
[IPI00319994](#) Tax\_Id=10090 Gene\_Symbol=Ldha L-lactate dehydrogenase A chain  
[IPI00118899](#) Tax\_Id=10090 Gene\_Symbol=Actn4 Alpha-actinin-4  
[IPI00123181](#) Tax\_Id=10090 Gene\_Symbol=Myh9 Myosin-9  
[IPI00223757](#) Tax\_Id=10090 Gene\_Symbol=Akrlb3 Aldose reductase  
[IPI00137331](#) Tax\_Id=10090 Gene\_Symbol=Cap1 Adenylyl cyclase-associated protein 1  
[IPI00223216](#) Tax\_Id=10090 Gene\_Symbol=Tst Thiosulfate sulfurtransferase  
[IPI00117167](#) Tax\_Id=10090 Gene\_Symbol=Gsn Isoform 1 of Gelsolin precursor  
[IPI00113141](#) Tax\_Id=10090 Gene\_Symbol=Cs Citrate synthase, mitochondrial precursor  
[IPI00466069](#) Tax\_Id=10090 Gene\_Symbol=Eef2 Elongation factor 2  
[IPI00128522](#) Tax\_Id=10090 Gene\_Symbol=Hspb1 Isoform A of Heat shock protein beta-1  
[IPI00129526](#) Tax\_Id=10090 Gene\_Symbol=Hsp90b1 Endoplasmic precursor  
[IPI00269661](#) Tax\_Id=10090 Gene\_Symbol=Hnrpa3 Isoform 1 of Heterogeneous nuclear ribonucleoprotein A3  
[IPI00467833](#) Tax\_Id=10090 Gene\_Symbol=Tpi1 Triosephosphate isomerase  
[IPI00462072](#) Tax\_Id=10090 Gene\_Symbol=EG433182;Enol;LOC100044223 Alpha-enolase  
[IPI00115522](#) Tax\_Id=10090 Gene\_Symbol=Fga fibrinogen, alpha polypeptide  
[IPI00137409](#) Tax\_Id=10090 Gene\_Symbol=Tkt Transketolase  
[IPI00468203](#) Tax\_Id=10090 Gene\_Symbol=Anxa2 Annexin A2  
[IPI00120030](#) Tax\_Id=10090 Gene\_Symbol=Crym Mu-crystallin homolog  
[IPI00874728](#) Tax\_Id=10090 Gene\_Symbol=Tpm2 Isoform 2 of Tropomyosin beta chain  
[IPI00114945](#) Tax\_Id=10090 Gene\_Symbol=Sept2 Septin-2  
[IPI00377592](#) Tax\_Id=10090 Gene\_Symbol=Sec31a SEC31-like 1  
[IPI00123494](#) Tax\_Id=10090 Gene\_Symbol=Psmd2 26S proteasome non-ATPase regulatory subunit 2  
[IPI00653931](#) Tax\_Id=10090 Gene\_Symbol=Fah Visual cortex cDNA, RIKEN full-length enriched library, clone:K430330E02 product:fumarylacetoacetate hydrolase  
[IPI00230212](#) Tax\_Id=10090 Gene\_Symbol=Gstml Glutathione S-transferase Mu 1  
[IPI00459570](#) Tax\_Id=10090 Gene\_Symbol=Tpm3 2 days neonate thymus thymic cells cDNA, RIKEN full-length enriched library, clone:C920030J24 product:tropomy  
[IPI00129107](#) Tax\_Id=10090 Gene\_Symbol=Gipcl PDZ domain-containing protein GIPC1  
[IPI00309768](#) Tax\_Id=10090 Gene\_Symbol=Pdlim1 PDZ and LIM domain protein 1  
[IPI00457659](#) Tax\_Id=10090 Gene\_Symbol=Serpib1a Leukocyte elastase inhibitor A  
[IPI00111265](#) Tax\_Id=10090 Gene\_Symbol=Capza2 F-actin-capping protein subunit alpha-2  
[IPI00133605](#) Tax\_Id=10090 Gene\_Symbol=Pklr Pyruvate kinase isozymes R/L  
[IPI00776343](#) Tax\_Id=10090 Gene\_Symbol=Ager RAGE  
[IPI00408119](#) Tax\_Id=10090 Gene\_Symbol=Mtap4 Isoform 1 of Microtubule-associated protein 4  
[IPI00421206](#) Tax\_Id=10090 Gene\_Symbol=Kctd12 BTB/POZ domain-containing protein KCTD12  
[IPI00459725](#) Tax\_Id=10090 Gene\_Symbol=Idh3a Isoform 1 of Isocitrate dehydrogenase [NAD] subunit alpha, mitochondrial precursor  
[IPI00467447](#) Tax\_Id=10090 Gene\_Symbol=Iqgap1 Ras GTPase-activating-like protein IQGAP1



[IPI00187462](#) Tax\_Id=10090 Gene\_Symbol=Gimap4 GTPase, IMAP family member 4 isoform a  
[IPI00420806](#) Tax\_Id=10090 Gene\_Symbol=Dync1li2 Cytoplasmic dynein 1 light intermediate chain 2  
[IPI00118875](#) Tax\_Id=10090 Gene\_Symbol=Eef1d eukaryotic translation elongation factor 1 delta isoform a  
[IPI00229510](#) Tax\_Id=10090 Gene\_Symbol=Ldhb L-lactate dehydrogenase B chain  
[IPI00138342](#) Tax\_Id=10090 Gene\_Symbol=Es1 Liver carboxylesterase N precursor  
[IPI00119111](#) Tax\_Id=10090 Gene\_Symbol=Cnn3 Calponin-3  
[IPI00377351](#) Tax\_Id=10090 Gene\_Symbol=Apoa4;ENSMUSG00000074373 Apolipoprotein A-IV precursor  
[IPI00336362](#) Tax\_Id=10090 Gene\_Symbol=Aldh1a7 Aldehyde dehydrogenase, cytosolic 1  
[IPI00317710](#) Tax\_Id=10090 Gene\_Symbol=Hspa4l Isoform 1 of Heat shock 70 kDa protein 4L  
[IPI00116074](#) Tax\_Id=10090 Gene\_Symbol=Aco2 Aconitate hydratase, mitochondrial precursor  
[IPI00114017](#) Tax\_Id=10090 Gene\_Symbol=Anxa7 Annexin A7  
[IPI00125143](#) Tax\_Id=10090 Gene\_Symbol=Arpc1b Arpc1b protein  
[IPI00133903](#) Tax\_Id=10090 Gene\_Symbol=Hspa9 Stress-70 protein, mitochondrial precursor  
[IPI00230682](#) Tax\_Id=10090 Gene\_Symbol=Ywhab Isoform Long of 14-3-3 protein beta/alpha  
[IPI00115528](#) Tax\_Id=10090 Gene\_Symbol=Pls3 Plastin 3  
[IPI00124264](#) Tax\_Id=10090 Gene\_Symbol=Anxa11 Annexin A11  
[IPI00226430](#) Tax\_Id=10090 Gene\_Symbol=Acaa2 3-ketoacyl-CoA thiolase, mitochondrial  
[IPI00313222](#) Tax\_Id=10090 Gene\_Symbol=Rpl6 60S ribosomal protein L6  
[IPI00228253](#) Tax\_Id=10090 Gene\_Symbol=Acat2 Acetyl-CoA acetyltransferase, cytosolic  
[IPI00283862](#) Tax\_Id=10090 Gene\_Symbol=Psmal Proteasome subunit alpha type-1  
[IPI00310240](#) Tax\_Id=10090 Gene\_Symbol=Anxa6 13 days embryo forelimb cDNA, RIKEN full-length enriched library, clone:5930413M14 product:annexin A6, full  
[IPI00116645](#) Tax\_Id=10090 Gene\_Symbol=Cnn1 Isoform Alpha of Calponin-1  
[IPI00221817](#) Tax\_Id=10090 Gene\_Symbol=Loh11cr2a Loss of heterozygosity 11 chromosomal region 2 gene A protein homolog  
[IPI00312058](#) Tax\_Id=10090 Gene\_Symbol=Cat Catalase  
[IPI00114894](#) Tax\_Id=10090 Gene\_Symbol=Myh11 Isoform 1 of Myosin-11  
[IPI00124287](#) Tax\_Id=10090 Gene\_Symbol=Pabpc1 Polyadenylate-binding protein 1  
[IPI00119667](#) Tax\_Id=10090 Gene\_Symbol=Eef1a2 Elongation factor 1-alpha 2  
[IPI00420882](#) Tax\_Id=10090 Gene\_Symbol=Ogdh Isoform 4 of 2-oxoglutarate dehydrogenase E1 component, mitochondrial precursor  
[IPI00129225](#) Tax\_Id=10090 Gene\_Symbol=Kng1 Isoform LMW of Kininogen-1 precursor  
[IPI00119114](#) Tax\_Id=10090 Gene\_Symbol=Acadl Long-chain specific acyl-CoA dehydrogenase, mitochondrial precursor  
[IPI00115833](#) Tax\_Id=10090 Gene\_Symbol=Mtap6 microtubule-associated protein 6 isoform 1  
[IPI00622946](#) Tax\_Id=10090 Gene\_Symbol=Palld Isoform 4 of Palladin  
[IPI00271262](#) Tax\_Id=10090 Gene\_Symbol=Mug2 Murinoglobulin-2 precursor  
[IPI00124692](#) Tax\_Id=10090 Gene\_Symbol=Taldol Transaldolase  
[IPI00117730](#) Tax\_Id=10090 Gene\_Symbol=Gbp3 Guanylate-binding protein 4  
[IPI00230706](#) Tax\_Id=10090 Gene\_Symbol=Pgam2 Phosphoglycerate mutase 2  
[IPI00127596](#) Tax\_Id=10090 Gene\_Symbol=Ckm Creatine kinase M-type  
[IPI00322312](#) Tax\_Id=10090 Gene\_Symbol=Arhgdia Rho GDP-dissociation inhibitor 1  
[IPI00353727](#) Tax\_Id=10090 Gene\_Symbol=Anxa4 Annexin A4  
[IPI00230108](#) Tax\_Id=10090 Gene\_Symbol=Pdia3 Protein disulfide-isomerase A3 precursor  
[IPI00462934](#) Tax\_Id=10090 Gene\_Symbol=Khsrp Far upstream element-binding protein 2  
[IPI00224626](#) Tax\_Id=10090 Gene\_Symbol=Sept7 cell division cycle 10 homolog  
[IPI00116498](#) Tax\_Id=10090 Gene\_Symbol=Ywhaz 14-3-3 protein zeta/delta  
[IPI00308885](#) Tax\_Id=10090 Gene\_Symbol=Hspd1 Isoform 1 of 60 kDa heat shock protein, mitochondrial precursor  
[IPI00314191](#) Tax\_Id=10090 Gene\_Symbol=Cbr1 Carbonyl reductase [NADPH] 1  
[IPI00378438](#) Tax\_Id=10090 Gene\_Symbol=Tns1 tensin 1  
[IPI00118678](#) Tax\_Id=10090 Gene\_Symbol=Tcp1 T-complex protein 1 subunit alpha A  
[IPI00223253](#) Tax\_Id=10090 Gene\_Symbol=Hnrpk Isoform 1 of Heterogeneous nuclear ribonucleoprotein K  
[IPI00115679](#) Tax\_Id=10090 Gene\_Symbol=Ganab Isoform 2 of Neutral alpha-glucosidase AB precursor  
[IPI00751017](#) Tax\_Id=10090 Gene\_Symbol=A230067G21Rik 99 kDa protein

[IPI00109600](#) Tax\_Id=10090 Gene\_Symbol=2410004A20Rik ES cells cDNA, RIKEN full-length enriched library, clone:2410004A20 product:hypothetical Alanine-ric:  
[IPI00136703](#) Tax\_Id=10090 Gene\_Symbol=Ckb Creatine kinase B-type  
[IPI00154054](#) Tax\_Id=10090 Gene\_Symbol=Acat1 Acetyl-CoA acetyltransferase, mitochondrial precursor  
[IPI00172328](#) Tax\_Id=10090 Gene\_Symbol=Dnahc8 Isoform 1 of Ciliary dynein heavy chain 8  
[IPI00229988](#) Tax\_Id=10090 Gene\_Symbol=Elf2c2 Eukaryotic translation initiation factor 2C 2  
[IPI00553798](#) Tax\_Id=10090 Gene\_Symbol=Ahnak AHNAK nucleoprotein isoform 1  
[IPI00348328](#) Tax\_Id=10090 Gene\_Symbol=Krt78 keratin Kb40  
[IPI00469952](#) Tax\_Id=10090 Gene\_Symbol=Prx Isoform 1 of Periaxin  
[IPI00119818](#) Tax\_Id=10090 Gene\_Symbol=Itih4 Adult male liver cDNA, RIKEN full-length enriched library, clone:1300004A21 product:inter alpha-trypsin inhi:  
[IPI00125971](#) Tax\_Id=10090 Gene\_Symbol=Psmc6 26S protease regulatory subunit S10B  
[IPI00110588](#) Tax\_Id=10090 Gene\_Symbol=Msn Moesin  
[IPI00116283](#) Tax\_Id=10090 Gene\_Symbol=Cct3 T-complex protein 1 subunit gamma  
[IPI00116281](#) Tax\_Id=10090 Gene\_Symbol=Cct6a T-complex protein 1 subunit zeta  
[IPI00408258](#) Tax\_Id=10090 Gene\_Symbol=Btbd12 BTB (POZ) domain containing 12  
[IPI00330476](#) Tax\_Id=10090 Gene\_Symbol=Cyfipl1 Isoform 1 of Cytoplasmic FMR1-interacting protein 1  
[IPI00315948](#) Tax\_Id=10090 Gene\_Symbol=Tbcb Tubulin folding cofactor B  
[IPI00458583](#) Tax\_Id=10090 Gene\_Symbol=Hnrnpu Osteoclast-like cell cDNA, RIKEN full-length enriched library, clone:I420039N16 product:heterogeneous nucle:  
[IPI00223224](#) Tax\_Id=10090 Gene\_Symbol=D130079A08Rik 12 days embryo spinal ganglion cDNA, RIKEN full-length enriched library, clone:D130079A08 product:hy:  
[IPI00762122](#) Tax\_Id=10090 Gene\_Symbol=- 462 kDa protein  
[IPI00121892](#) Tax\_Id=10090 Gene\_Symbol=Spnb2 Isoform 2 of Spectrin beta chain, brain 1  
[IPI00762403](#) Tax\_Id=10090 Gene\_Symbol=Usp31 ubiquitin specific protease 31  
[IPI00126072](#) Tax\_Id=10090 Gene\_Symbol=Vat1 Synaptic vesicle membrane protein VAT-1 homolog  
[IPI00402968](#) Tax\_Id=10090 Gene\_Symbol=Ehd2 13 days embryo forelimb cDNA, RIKEN full-length enriched library, clone:5930429A15 product:EH DOMAIN-CONTAINI:  
[IPI00461360](#) Tax\_Id=10090 Gene\_Symbol=Ccdc39 Coiled-coil domain-containing protein 39  
[IPI00131395](#) Tax\_Id=10090 Gene\_Symbol=Znf512b MKIAA1196 protein  
[IPI00120274](#) Tax\_Id=10090 Gene\_Symbol=Npcd;Cbx6 Chromobox protein homolog 6  
[IPI00132700](#) Tax\_Id=10090 Gene\_Symbol=Mrpl35 39S ribosomal protein L35, mitochondrial precursor

## Probability Based Mowse Score

Ions score is  $-10 \cdot \log(P)$ , where P is the probability that the observed match is a random event.  
 Individual ions scores > 34 indicate identity or extensive homology ( $p < 0.05$ ).  
 Protein scores are derived from ions scores as a non-probabilistic basis for ranking protein hits.

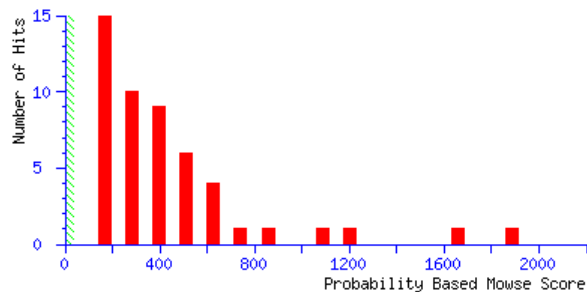

## Peptide Summary Report

Format As Peptide Summary

[Help](#)

Significance threshold  $p <$   Max. number of hits

Standard scoring  MudPIT scoring  Ions score or expect cut-off  Show sub-sets

Show pop-ups  Suppress pop-ups  Sort unassigned  Require bold red

Select All

Select None

Search Selected

 Error tolerant

Archive Report

1. [IPI00874482](#) Mass: 42108 Score: 1889 Queries matched: 124 emPAI: 17.51

Tax\_Id=10090 Gene\_Symbol=Actg1 Actin, cytoplasmic 2

 Check to include this hit in error tolerant search or archive report

| Query                                                    | Observed | Mr (expt) | Mr (calc) | ppm  | Miss | Score | Expect   | Rank | Peptide                                                          |
|----------------------------------------------------------|----------|-----------|-----------|------|------|-------|----------|------|------------------------------------------------------------------|
| <input checked="" type="checkbox"/> <a href="#">435</a>  | 350.7531 | 699.4916  | 699.4894  | 3.02 | 0    | (33)  | 0.032    | 1    | R_GILTLK.Y + Dimethyl (K); Dimethyl (N-term)                     |
| <input checked="" type="checkbox"/> <a href="#">442</a>  | 354.7782 | 707.5418  | 707.5397  | 3.07 | 0    | (33)  | 0.029    | 1    | R_GILTLK.Y + Dimethyl:2H(4) (K); Dimethyl:2H(4) (N-term)         |
| <input checked="" type="checkbox"/> <a href="#">443</a>  | 354.7784 | 707.5423  | 707.5397  | 3.76 | 0    | 42    | 0.0033   | 1    | R_GILTLK.Y + Dimethyl:2H(4) (K); Dimethyl:2H(4) (N-term)         |
| <input checked="" type="checkbox"/> <a href="#">642</a>  | 412.2567 | 822.4988  | 822.4963  | 3.05 | 0    | 36    | 0.031    | 1    | K_IIAPPER.K + Dimethyl (N-term)                                  |
| <input checked="" type="checkbox"/> <a href="#">1039</a> | 504.7576 | 1007.5006 | 1007.4974 | 3.20 | 0    | (51)  | 0.00074  | 1    | K_AGFAGDDAPR.A + Dimethyl:2H(4) (N-term)                         |
| <input checked="" type="checkbox"/> <a href="#">1040</a> | 504.7577 | 1007.5009 | 1007.4974 | 3.45 | 0    | 57    | 0.00018  | 1    | K_AGFAGDDAPR.A + Dimethyl:2H(4) (N-term)                         |
| <input checked="" type="checkbox"/> <a href="#">1187</a> | 527.7816 | 1053.5486 | 1053.5416 | 6.59 | 0    | 46    | 0.003    | 1    | R_DLTDYLMK.I + Dimethyl (K); Dimethyl (N-term)                   |
| <input checked="" type="checkbox"/> <a href="#">1212</a> | 531.8063 | 1061.5981 | 1061.5918 | 5.91 | 0    | (43)  | 0.0091   | 1    | R_DLTDYLMK.I + Dimethyl:2H(4) (K); Dimethyl:2H(4) (N-term)       |
| <input checked="" type="checkbox"/> <a href="#">1437</a> | 580.7851 | 1159.5557 | 1159.5509 | 4.12 | 0    | 38    | 0.01     | 1    | R_GYSFTTAER.E + Dimethyl (N-term)                                |
| <input checked="" type="checkbox"/> <a href="#">1438</a> | 580.7855 | 1159.5564 | 1159.5509 | 4.68 | 0    | (32)  | 0.036    | 1    | R_GYSFTTAER.E + Dimethyl (N-term)                                |
| <input checked="" type="checkbox"/> <a href="#">1446</a> | 582.7978 | 1163.5810 | 1163.5761 | 4.26 | 0    | (31)  | 0.068    | 1    | R_GYSFTTAER.E + Dimethyl:2H(4) (N-term)                          |
| <input checked="" type="checkbox"/> <a href="#">1447</a> | 582.7985 | 1163.5824 | 1163.5761 | 5.42 | 0    | (34)  | 0.036    | 1    | R_GYSFTTAER.E + Dimethyl:2H(4) (N-term)                          |
| <input checked="" type="checkbox"/> <a href="#">1653</a> | 609.3474 | 1216.6802 | 1216.6737 | 5.32 | 0    | (42)  | 0.011    | 1    | K_EITALAPSTMK.I + Dimethyl (K); Dimethyl (N-term)                |
| <input checked="" type="checkbox"/> <a href="#">1654</a> | 609.3474 | 1216.6802 | 1216.6737 | 5.32 | 0    | (40)  | 0.016    | 1    | K_EITALAPSTMK.I + Dimethyl (K); Dimethyl (N-term)                |
| <input checked="" type="checkbox"/> <a href="#">1705</a> | 613.3725 | 1224.7304 | 1224.7239 | 5.34 | 0    | 44    | 0.0071   | 1    | K_EITALAPSTMK.I + Dimethyl:2H(4) (K); Dimethyl:2H(4) (N-term)    |
| <input checked="" type="checkbox"/> <a href="#">1706</a> | 613.3725 | 1224.7304 | 1224.7239 | 5.34 | 0    | (42)  | 0.0098   | 1    | K_EITALAPSTMK.I + Dimethyl:2H(4) (K); Dimethyl:2H(4) (N-term)    |
| <input checked="" type="checkbox"/> <a href="#">1712</a> | 409.5852 | 1225.7337 | 1225.7295 | 3.42 | 0    | (35)  | 0.049    | 1    | R_AVFPSIVGRPR.H + Dimethyl (N-term)                              |
| <input checked="" type="checkbox"/> <a href="#">1713</a> | 409.5852 | 1225.7337 | 1225.7295 | 3.42 | 0    | (44)  | 0.0071   | 1    | R_AVFPSIVGRPR.H + Dimethyl (N-term)                              |
| <input checked="" type="checkbox"/> <a href="#">1714</a> | 613.8741 | 1225.7337 | 1225.7295 | 3.43 | 0    | 67    | 3.3e-005 | 1    | R_AVFPSIVGRPR.H + Dimethyl (N-term)                              |
| <input checked="" type="checkbox"/> <a href="#">1717</a> | 409.5854 | 1225.7343 | 1225.7295 | 3.92 | 0    | (34)  | 0.065    | 1    | R_AVFPSIVGRPR.H + Dimethyl (N-term)                              |
| <input checked="" type="checkbox"/> <a href="#">1718</a> | 409.5855 | 1225.7347 | 1225.7295 | 4.24 | 0    | (43)  | 0.0088   | 1    | R_AVFPSIVGRPR.H + Dimethyl (N-term)                              |
| <input checked="" type="checkbox"/> <a href="#">1719</a> | 613.8748 | 1225.7350 | 1225.7295 | 4.44 | 0    | (52)  | 0.00092  | 1    | R_AVFPSIVGRPR.H + Dimethyl (N-term)                              |
| <input checked="" type="checkbox"/> <a href="#">1722</a> | 409.8839 | 1226.6297 | 1226.6264 | 2.72 | 0    | (43)  | 0.0054   | 1    | R_HQGVVGMGQK.D + Dimethyl (K); Dimethyl (N-term)                 |
| <input checked="" type="checkbox"/> <a href="#">1723</a> | 409.8839 | 1226.6299 | 1226.6264 | 2.86 | 0    | (31)  | 0.099    | 1    | R_HQGVVGMGQK.D + Dimethyl (K); Dimethyl (N-term)                 |
| <input checked="" type="checkbox"/> <a href="#">1724</a> | 614.3229 | 1226.6313 | 1226.6264 | 4.02 | 0    | 48    | 0.0019   | 1    | R_HQGVVGMGQK.D + Dimethyl (K); Dimethyl (N-term)                 |
| <input checked="" type="checkbox"/> <a href="#">1758</a> | 410.9269 | 1229.7587 | 1229.7546 | 3.32 | 0    | (36)  | 0.037    | 1    | R_AVFPSIVGRPR.H + Dimethyl:2H(4) (N-term)                        |
| <input checked="" type="checkbox"/> <a href="#">1759</a> | 410.9271 | 1229.7594 | 1229.7546 | 3.84 | 0    | (43)  | 0.0074   | 1    | R_AVFPSIVGRPR.H + Dimethyl:2H(4) (N-term)                        |
| <input checked="" type="checkbox"/> <a href="#">1760</a> | 410.9271 | 1229.7595 | 1229.7546 | 3.91 | 0    | (35)  | 0.041    | 1    | R_AVFPSIVGRPR.H + Dimethyl:2H(4) (N-term)                        |
| <input checked="" type="checkbox"/> <a href="#">1761</a> | 410.9272 | 1229.7597 | 1229.7546 | 4.13 | 0    | (37)  | 0.027    | 1    | R_AVFPSIVGRPR.H + Dimethyl:2H(4) (N-term)                        |
| <input checked="" type="checkbox"/> <a href="#">1762</a> | 615.8871 | 1229.7597 | 1229.7546 | 4.13 | 0    | (54)  | 0.0006   | 1    | R_AVFPSIVGRPR.H + Dimethyl:2H(4) (N-term)                        |
| <input checked="" type="checkbox"/> <a href="#">1763</a> | 615.8876 | 1229.7607 | 1229.7546 | 4.95 | 0    | (59)  | 0.00019  | 1    | R_AVFPSIVGRPR.H + Dimethyl:2H(4) (N-term)                        |
| <input checked="" type="checkbox"/> <a href="#">1777</a> | 617.3446 | 1232.6747 | 1232.6686 | 4.91 | 0    | (32)  | 0.13     | 1    | K_EITALAPSTMK.I + Dimethyl (K); Dimethyl (N-term); Oxidation (M) |

|                                     |                      |          |           |           |        |   |      |          |   |                                                                                         |
|-------------------------------------|----------------------|----------|-----------|-----------|--------|---|------|----------|---|-----------------------------------------------------------------------------------------|
| <input checked="" type="checkbox"/> | <a href="#">1778</a> | 617.3448 | 1232.6751 | 1232.6686 | 5.31   | 0 | (33) | 0.089    | 1 | K_EITALAPSTMK.I + Dimethyl (K); Dimethyl (N-term); Oxidation (M)                        |
| <input checked="" type="checkbox"/> | <a href="#">1790</a> | 412.5673 | 1234.6801 | 1234.6766 | 2.84   | 0 | (38) | 0.038    | 1 | R_HQGVVMVGMGQK.D + Dimethyl:2H(4) (K); Dimethyl:2H(4) (N-term)                          |
| <input checked="" type="checkbox"/> | <a href="#">1791</a> | 412.5673 | 1234.6802 | 1234.6766 | 2.92   | 0 | (36) | 0.048    | 1 | R_HQGVVMVGMGQK.D + Dimethyl:2H(4) (K); Dimethyl:2H(4) (N-term)                          |
| <input checked="" type="checkbox"/> | <a href="#">1792</a> | 618.3480 | 1234.6814 | 1234.6766 | 3.85   | 0 | (39) | 0.025    | 1 | R_HQGVVMVGMGQK.D + Dimethyl:2H(4) (K); Dimethyl:2H(4) (N-term)                          |
| <input checked="" type="checkbox"/> | <a href="#">1817</a> | 621.3697 | 1240.7248 | 1240.7188 | 4.83   | 0 | (30) | 0.2      | 1 | K_EITALAPSTMK.I + Dimethyl:2H(4) (K); Dimethyl:2H(4) (N-term); Oxidation (M)            |
| <input checked="" type="checkbox"/> | <a href="#">1818</a> | 621.3698 | 1240.7251 | 1240.7188 | 5.03   | 0 | (30) | 0.21     | 1 | K_EITALAPSTMK.I + Dimethyl:2H(4) (K); Dimethyl:2H(4) (N-term); Oxidation (M)            |
| <input checked="" type="checkbox"/> | <a href="#">2305</a> | 473.5849 | 1417.7330 | 1417.7289 | 2.88   | 1 | (25) | 0.52     | 1 | K_DSYVGVDEAQSQR.G + Dimethyl:2H(4) (K); Dimethyl:2H(4) (N-term)                         |
| <input checked="" type="checkbox"/> | <a href="#">2306</a> | 473.5851 | 1417.7335 | 1417.7289 | 3.27   | 1 | 50   | 0.0019   | 1 | K_DSYVGVDEAQSQR.G + Dimethyl:2H(4) (K); Dimethyl:2H(4) (N-term)                         |
| <input checked="" type="checkbox"/> | <a href="#">2624</a> | 505.6606 | 1513.9601 | 1513.9543 | 3.86   | 1 | 42   | 0.004    | 1 | K_EITALAPSTMKIK.I + 2 Dimethyl:2H(4) (K); Dimethyl:2H(4) (N-term); Oxidation (M)        |
| <input checked="" type="checkbox"/> | <a href="#">2873</a> | 544.9758 | 1631.9057 | 1631.8990 | 4.09   | 1 | (45) | 0.007    | 1 | R_MQKEITALAPSTMK.I + 2 Dimethyl (K); Dimethyl (N-term)                                  |
| <input checked="" type="checkbox"/> | <a href="#">2874</a> | 544.9761 | 1631.9066 | 1631.8990 | 4.65   | 1 | (44) | 0.0083   | 1 | R_MQKEITALAPSTMK.I + 2 Dimethyl (K); Dimethyl (N-term)                                  |
| <input checked="" type="checkbox"/> | <a href="#">2907</a> | 549.0010 | 1643.9811 | 1643.9743 | 4.12   | 1 | (41) | 0.014    | 1 | R_MQKEITALAPSTMK.I + 2 Dimethyl:2H(4) (K); Dimethyl:2H(4) (N-term)                      |
| <input checked="" type="checkbox"/> | <a href="#">2908</a> | 549.0011 | 1643.9815 | 1643.9743 | 4.34   | 1 | 51   | 0.0011   | 1 | R_MQKEITALAPSTMK.I + 2 Dimethyl:2H(4) (K); Dimethyl:2H(4) (N-term)                      |
| <input checked="" type="checkbox"/> | <a href="#">2965</a> | 554.3323 | 1659.9752 | 1659.9693 | 3.57   | 1 | (29) | 0.2      | 1 | R_MQKEITALAPSTMK.I + 2 Dimethyl:2H(4) (K); Dimethyl:2H(4) (N-term); Oxidation (M)       |
| <input checked="" type="checkbox"/> | <a href="#">3301</a> | 606.9832 | 1817.9277 | 1817.9159 | 6.49   | 0 | (46) | 0.0048   | 1 | K_SYELPDGQVITIGNER.F + Dimethyl (N-term)                                                |
| <input checked="" type="checkbox"/> | <a href="#">3302</a> | 909.9726 | 1817.9307 | 1817.9159 | 8.14   | 0 | (90) | 2e-007   | 1 | K_SYELPDGQVITIGNER.F + Dimethyl (N-term)                                                |
| <input checked="" type="checkbox"/> | <a href="#">3303</a> | 909.9731 | 1817.9317 | 1817.9159 | 8.69   | 0 | (79) | 2.5e-006 | 1 | K_SYELPDGQVITIGNER.F + Dimethyl (N-term)                                                |
| <input checked="" type="checkbox"/> | <a href="#">3323</a> | 608.3251 | 1821.9536 | 1821.9410 | 6.88   | 0 | (30) | 0.23     | 1 | K_SYELPDGQVITIGNER.F + Dimethyl:2H(4) (N-term)                                          |
| <input checked="" type="checkbox"/> | <a href="#">3324</a> | 911.9853 | 1821.9560 | 1821.9410 | 8.22   | 0 | 92   | 1.6e-007 | 1 | K_SYELPDGQVITIGNER.F + Dimethyl:2H(4) (N-term)                                          |
| <input checked="" type="checkbox"/> | <a href="#">3325</a> | 911.9858 | 1821.9570 | 1821.9410 | 8.76   | 0 | (87) | 5e-007   | 1 | K_SYELPDGQVITIGNER.F + Dimethyl:2H(4) (N-term)                                          |
| <input checked="" type="checkbox"/> | <a href="#">3440</a> | 934.4482 | 1866.8818 | 1866.9005 | -10.00 | 0 | 28   | 0.15     | 1 | M_EEEIAALVIDNGSGMCK.A + Dimethyl:2H(4) (K)                                              |
| <input checked="" type="checkbox"/> | <a href="#">3705</a> | 670.7178 | 2009.1315 | 2009.1197 | 5.87   | 0 | (40) | 0.018    | 1 | R_VAPEEHPVLLTEAPLNPK.A + Dimethyl (K); Dimethyl (N-term)                                |
| <input checked="" type="checkbox"/> | <a href="#">3706</a> | 670.7178 | 2009.1315 | 2009.1197 | 5.87   | 0 | (37) | 0.038    | 1 | R_VAPEEHPVLLTEAPLNPK.A + Dimethyl (K); Dimethyl (N-term)                                |
| <input checked="" type="checkbox"/> | <a href="#">3707</a> | 670.7179 | 2009.1317 | 2009.1197 | 5.99   | 0 | (41) | 0.017    | 1 | R_VAPEEHPVLLTEAPLNPK.A + Dimethyl (K); Dimethyl (N-term)                                |
| <input checked="" type="checkbox"/> | <a href="#">3708</a> | 670.7179 | 2009.1317 | 2009.1197 | 5.99   | 0 | (44) | 0.0084   | 1 | R_VAPEEHPVLLTEAPLNPK.A + Dimethyl (K); Dimethyl (N-term)                                |
| <input checked="" type="checkbox"/> | <a href="#">3709</a> | 670.7180 | 2009.1322 | 2009.1197 | 6.24   | 0 | (39) | 0.023    | 1 | R_VAPEEHPVLLTEAPLNPK.A + Dimethyl (K); Dimethyl (N-term)                                |
| <input checked="" type="checkbox"/> | <a href="#">3742</a> | 673.3995 | 2017.1767 | 2017.1699 | 3.37   | 0 | (31) | 0.095    | 1 | R_VAPEEHPVLLTEAPLNPK.A + Dimethyl:2H(4) (K); Dimethyl:2H(4) (N-term)                    |
| <input checked="" type="checkbox"/> | <a href="#">3746</a> | 673.4012 | 2017.1817 | 2017.1699 | 5.85   | 0 | (44) | 0.0051   | 1 | R_VAPEEHPVLLTEAPLNPK.A + Dimethyl:2H(4) (K); Dimethyl:2H(4) (N-term)                    |
| <input checked="" type="checkbox"/> | <a href="#">3747</a> | 673.4013 | 2017.1821 | 2017.1699 | 6.03   | 0 | (42) | 0.0083   | 1 | R_VAPEEHPVLLTEAPLNPK.A + Dimethyl:2H(4) (K); Dimethyl:2H(4) (N-term)                    |
| <input checked="" type="checkbox"/> | <a href="#">3748</a> | 673.4015 | 2017.1827 | 2017.1699 | 6.35   | 0 | 46   | 0.0029   | 1 | R_VAPEEHPVLLTEAPLNPK.A + Dimethyl:2H(4) (K); Dimethyl:2H(4) (N-term)                    |
| <input checked="" type="checkbox"/> | <a href="#">3749</a> | 673.4017 | 2017.1832 | 2017.1699 | 6.57   | 0 | (45) | 0.0039   | 1 | R_VAPEEHPVLLTEAPLNPK.A + Dimethyl:2H(4) (K); Dimethyl:2H(4) (N-term)                    |
| <input checked="" type="checkbox"/> | <a href="#">4239</a> | 800.4190 | 2398.2352 | 2398.2202 | 6.24   | 1 | (51) | 0.002    | 1 | R_KDLYANTVLSGGTTMYPGIADR.M + Dimethyl (K); Dimethyl (N-term)                            |
| <input checked="" type="checkbox"/> | <a href="#">4240</a> | 800.4199 | 2398.2377 | 2398.2202 | 7.29   | 1 | (71) | 1.7e-005 | 1 | R_KDLYANTVLSGGTTMYPGIADR.M + Dimethyl (K); Dimethyl (N-term)                            |
| <input checked="" type="checkbox"/> | <a href="#">4243</a> | 803.1025 | 2406.2856 | 2406.2705 | 6.29   | 1 | (55) | 0.00086  | 1 | R_KDLYANTVLSGGTTMYPGIADR.M + Dimethyl:2H(4) (K); Dimethyl:2H(4) (N-term)                |
| <input checked="" type="checkbox"/> | <a href="#">4244</a> | 803.1038 | 2406.2897 | 2406.2705 | 8.00   | 1 | (32) | 0.18     | 1 | R_KDLYANTVLSGGTTMYPGIADR.M + Dimethyl:2H(4) (K); Dimethyl:2H(4) (N-term)                |
| <input checked="" type="checkbox"/> | <a href="#">4245</a> | 803.1039 | 2406.2898 | 2406.2705 | 8.04   | 1 | (58) | 0.00042  | 1 | R_KDLYANTVLSGGTTMYPGIADR.M + Dimethyl:2H(4) (K); Dimethyl:2H(4) (N-term)                |
| <input checked="" type="checkbox"/> | <a href="#">4257</a> | 805.7502 | 2414.2289 | 2414.2151 | 5.70   | 1 | 77   | 4e-006   | 1 | R_KDLYANTVLSGGTTMYPGIADR.M + Dimethyl (K); Dimethyl (N-term); Oxidation (M)             |
| <input checked="" type="checkbox"/> | <a href="#">4260</a> | 808.4335 | 2422.2788 | 2422.2654 | 5.52   | 1 | (60) | 0.00022  | 1 | R_KDLYANTVLSGGTTMYPGIADR.M + Dimethyl:2H(4) (K); Dimethyl:2H(4) (N-term); Oxidation (M) |
| <input checked="" type="checkbox"/> | <a href="#">4270</a> | 609.5505 | 2434.1727 | 2434.1621 | 4.37   | 1 | (35) | 0.046    | 1 | R_HQGVVMVGMGQKDSYVGVDEAQSQR + 2 Dimethyl (K); Dimethyl (N-term)                         |
| <input checked="" type="checkbox"/> | <a href="#">4271</a> | 609.5505 | 2434.1727 | 2434.1621 | 4.37   | 1 | (42) | 0.0092   | 1 | R_HQGVVMVGMGQKDSYVGVDEAQSQR + 2 Dimethyl (K); Dimethyl (N-term)                         |
| <input checked="" type="checkbox"/> | <a href="#">4272</a> | 609.5505 | 2434.1730 | 2434.1621 | 4.50   | 1 | (39) | 0.017    | 1 | R_HQGVVMVGMGQKDSYVGVDEAQSQR + 2 Dimethyl (K); Dimethyl (N-term)                         |
| <input checked="" type="checkbox"/> | <a href="#">4273</a> | 609.5508 | 2434.1743 | 2434.1621 | 5.00   | 1 | (30) | 0.14     | 1 | R_HQGVVMVGMGQKDSYVGVDEAQSQR + 2 Dimethyl (K); Dimethyl (N-term)                         |
| <input checked="" type="checkbox"/> | <a href="#">4286</a> | 612.5690 | 2446.2467 | 2446.2374 | 3.80   | 1 | (27) | 0.42     | 1 | R_HQGVVMVGMGQKDSYVGVDEAQSQR + 2 Dimethyl:2H(4) (K); Dimethyl:2H(4) (N-term)             |
| <input checked="" type="checkbox"/> | <a href="#">4288</a> | 612.5695 | 2446.2487 | 2446.2374 | 4.62   | 1 | (37) | 0.041    | 1 | R_HQGVVMVGMGQKDSYVGVDEAQSQR + 2 Dimethyl:2H(4) (K); Dimethyl:2H(4) (N-term)             |
| <input checked="" type="checkbox"/> | <a href="#">4289</a> | 612.5695 | 2446.2487 | 2446.2374 | 4.62   | 1 | (38) | 0.033    | 1 | R_HQGVVMVGMGQKDSYVGVDEAQSQR + 2 Dimethyl:2H(4) (K); Dimethyl:2H(4) (N-term)             |

|                                     |                      |          |           |           |       |   |      |          |   |                                                                                                             |
|-------------------------------------|----------------------|----------|-----------|-----------|-------|---|------|----------|---|-------------------------------------------------------------------------------------------------------------|
| <input checked="" type="checkbox"/> | <a href="#">4291</a> | 613.5488 | 2450.1662 | 2450.1570 | 3.76  | 1 | (54) | 0.00046  | 1 | R_HQGVVVMGQKDSYVGD <small>EAQSK</small> .R + 2 Dimethyl (K); Dimethyl (N-term); Oxidation (M)               |
| <input checked="" type="checkbox"/> | <a href="#">4292</a> | 613.5492 | 2450.1677 | 2450.1570 | 4.38  | 1 | (37) | 0.022    | 1 | R_HQGVVVMGQKDSYVGD <small>EAQSK</small> .R + 2 Dimethyl (K); Dimethyl (N-term); Oxidation (M)               |
| <input checked="" type="checkbox"/> | <a href="#">4293</a> | 613.5492 | 2450.1677 | 2450.1570 | 4.38  | 1 | (48) | 0.0018   | 1 | R_HQGVVVMGQKDSYVGD <small>EAQSK</small> .R + 2 Dimethyl (K); Dimethyl (N-term); Oxidation (M)               |
| <input checked="" type="checkbox"/> | <a href="#">4294</a> | 613.5493 | 2450.1682 | 2450.1570 | 4.56  | 1 | (38) | 0.02     | 1 | R_HQGVVVMGQKDSYVGD <small>EAQSK</small> .R + 2 Dimethyl (K); Dimethyl (N-term); Oxidation (M)               |
| <input checked="" type="checkbox"/> | <a href="#">4295</a> | 613.5493 | 2450.1682 | 2450.1570 | 4.56  | 1 | (30) | 0.1      | 1 | R_HQGVVVMGQKDSYVGD <small>EAQSK</small> .R + 2 Dimethyl (K); Dimethyl (N-term); Oxidation (M)               |
| <input checked="" type="checkbox"/> | <a href="#">4296</a> | 613.5494 | 2450.1686 | 2450.1570 | 4.75  | 1 | 60   | 0.00012  | 1 | R_HQGVVVMGQKDSYVGD <small>EAQSK</small> .R + 2 Dimethyl (K); Dimethyl (N-term); Oxidation (M)               |
| <input checked="" type="checkbox"/> | <a href="#">4310</a> | 616.5677 | 2462.2416 | 2462.2323 | 3.77  | 1 | (41) | 0.019    | 1 | R_HQGVVVMGQKDSYVGD <small>EAQSK</small> .R + 2 Dimethyl:2H(4) (K); Dimethyl:2H(4) (N-term); Oxidation (M)   |
| <input checked="" type="checkbox"/> | <a href="#">4311</a> | 616.5677 | 2462.2417 | 2462.2323 | 3.81  | 1 | (35) | 0.076    | 1 | R_HQGVVVMGQKDSYVGD <small>EAQSK</small> .R + 2 Dimethyl:2H(4) (K); Dimethyl:2H(4) (N-term); Oxidation (M)   |
| <input checked="" type="checkbox"/> | <a href="#">4312</a> | 616.5679 | 2462.2424 | 2462.2323 | 4.07  | 1 | (40) | 0.024    | 1 | R_HQGVVVMGQKDSYVGD <small>EAQSK</small> .R + 2 Dimethyl:2H(4) (K); Dimethyl:2H(4) (N-term); Oxidation (M)   |
| <input checked="" type="checkbox"/> | <a href="#">4313</a> | 616.5679 | 2462.2424 | 2462.2323 | 4.07  | 1 | (37) | 0.047    | 1 | R_HQGVVVMGQKDSYVGD <small>EAQSK</small> .R + 2 Dimethyl:2H(4) (K); Dimethyl:2H(4) (N-term); Oxidation (M)   |
| <input checked="" type="checkbox"/> | <a href="#">4314</a> | 616.5680 | 2462.2427 | 2462.2323 | 4.21  | 1 | (35) | 0.067    | 1 | R_HQGVVVMGQKDSYVGD <small>EAQSK</small> .R + 2 Dimethyl:2H(4) (K); Dimethyl:2H(4) (N-term); Oxidation (M)   |
| <input checked="" type="checkbox"/> | <a href="#">4315</a> | 616.5680 | 2462.2427 | 2462.2323 | 4.21  | 1 | (31) | 0.18     | 1 | R_HQGVVVMGQKDSYVGD <small>EAQSK</small> .R + 2 Dimethyl:2H(4) (K); Dimethyl:2H(4) (N-term); Oxidation (M)   |
| <input checked="" type="checkbox"/> | <a href="#">4316</a> | 616.5680 | 2462.2429 | 2462.2323 | 4.27  | 1 | (27) | 0.45     | 1 | R_HQGVVVMGQKDSYVGD <small>EAQSK</small> .R + 2 Dimethyl:2H(4) (K); Dimethyl:2H(4) (N-term); Oxidation (M)   |
| <input checked="" type="checkbox"/> | <a href="#">4320</a> | 617.5475 | 2466.1608 | 2466.1519 | 3.61  | 1 | (35) | 0.033    | 1 | R_HQGVVVMGQKDSYVGD <small>EAQSK</small> .R + 2 Dimethyl (K); Dimethyl (N-term); 2 Oxidation (M)             |
| <input checked="" type="checkbox"/> | <a href="#">4321</a> | 617.5480 | 2466.1627 | 2466.1519 | 4.38  | 1 | (53) | 0.00045  | 1 | R_HQGVVVMGQKDSYVGD <small>EAQSK</small> .R + 2 Dimethyl (K); Dimethyl (N-term); 2 Oxidation (M)             |
| <input checked="" type="checkbox"/> | <a href="#">4322</a> | 617.5482 | 2466.1637 | 2466.1519 | 4.79  | 1 | (47) | 0.002    | 1 | R_HQGVVVMGQKDSYVGD <small>EAQSK</small> .R + 2 Dimethyl (K); Dimethyl (N-term); 2 Oxidation (M)             |
| <input checked="" type="checkbox"/> | <a href="#">4323</a> | 617.5482 | 2466.1638 | 2466.1519 | 4.80  | 1 | (32) | 0.06     | 1 | R_HQGVVVMGQKDSYVGD <small>EAQSK</small> .R + 2 Dimethyl (K); Dimethyl (N-term); 2 Oxidation (M)             |
| <input checked="" type="checkbox"/> | <a href="#">4334</a> | 620.5660 | 2478.2347 | 2478.2273 | 3.01  | 1 | (44) | 0.0081   | 1 | R_HQGVVVMGQKDSYVGD <small>EAQSK</small> .R + 2 Dimethyl:2H(4) (K); Dimethyl:2H(4) (N-term); 2 Oxidation (M) |
| <input checked="" type="checkbox"/> | <a href="#">4335</a> | 620.5660 | 2478.2351 | 2478.2273 | 3.14  | 1 | (50) | 0.0019   | 1 | R_HQGVVVMGQKDSYVGD <small>EAQSK</small> .R + 2 Dimethyl:2H(4) (K); Dimethyl:2H(4) (N-term); 2 Oxidation (M) |
| <input checked="" type="checkbox"/> | <a href="#">4336</a> | 620.5665 | 2478.2367 | 2478.2273 | 3.82  | 1 | (33) | 0.1      | 1 | R_HQGVVVMGQKDSYVGD <small>EAQSK</small> .R + 2 Dimethyl:2H(4) (K); Dimethyl:2H(4) (N-term); 2 Oxidation (M) |
| <input checked="" type="checkbox"/> | <a href="#">4337</a> | 620.5665 | 2478.2368 | 2478.2273 | 3.83  | 1 | (37) | 0.035    | 1 | R_HQGVVVMGQKDSYVGD <small>EAQSK</small> .R + 2 Dimethyl:2H(4) (K); Dimethyl:2H(4) (N-term); 2 Oxidation (M) |
| <input checked="" type="checkbox"/> | <a href="#">4374</a> | 648.5753 | 2590.2719 | 2590.2632 | 3.37  | 2 | (47) | 0.003    | 1 | R_HQGVVVMGQKDSYVGD <small>EAQSK</small> .G + 2 Dimethyl (K); Dimethyl (N-term)                              |
| <input checked="" type="checkbox"/> | <a href="#">4375</a> | 648.5760 | 2590.2747 | 2590.2632 | 4.45  | 2 | (60) | 0.00019  | 1 | R_HQGVVVMGQKDSYVGD <small>EAQSK</small> .G + 2 Dimethyl (K); Dimethyl (N-term)                              |
| <input checked="" type="checkbox"/> | <a href="#">4376</a> | 648.5760 | 2590.2751 | 2590.2632 | 4.60  | 2 | (58) | 0.00026  | 1 | R_HQGVVVMGQKDSYVGD <small>EAQSK</small> .G + 2 Dimethyl (K); Dimethyl (N-term)                              |
| <input checked="" type="checkbox"/> | <a href="#">4377</a> | 648.5762 | 2590.2757 | 2590.2632 | 4.84  | 2 | (49) | 0.002    | 1 | R_HQGVVVMGQKDSYVGD <small>EAQSK</small> .G + 2 Dimethyl (K); Dimethyl (N-term)                              |
| <input checked="" type="checkbox"/> | <a href="#">4382</a> | 649.5785 | 2594.2847 | 2594.2883 | -1.38 | 2 | (29) | 0.24     | 1 | R_HQGVVVMGQKDSYVGD <small>EAQSK</small> .G + 2 Dimethyl (K); Dimethyl:2H(4) (N-term)                        |
| <input checked="" type="checkbox"/> | <a href="#">4383</a> | 649.5792 | 2594.2877 | 2594.2883 | -0.22 | 2 | (37) | 0.036    | 1 | R_HQGVVVMGQKDSYVGD <small>EAQSK</small> .G + 2 Dimethyl (K); Dimethyl:2H(4) (N-term)                        |
| <input checked="" type="checkbox"/> | <a href="#">4386</a> | 651.5940 | 2602.3467 | 2602.3385 | 3.15  | 2 | (35) | 0.074    | 1 | R_HQGVVVMGQKDSYVGD <small>EAQSK</small> .G + 2 Dimethyl:2H(4) (K); Dimethyl:2H(4) (N-term)                  |
| <input checked="" type="checkbox"/> | <a href="#">4387</a> | 651.5942 | 2602.3477 | 2602.3385 | 3.53  | 2 | (42) | 0.014    | 1 | R_HQGVVVMGQKDSYVGD <small>EAQSK</small> .G + 2 Dimethyl:2H(4) (K); Dimethyl:2H(4) (N-term)                  |
| <input checked="" type="checkbox"/> | <a href="#">4388</a> | 651.5946 | 2602.3493 | 2602.3385 | 4.14  | 2 | (41) | 0.018    | 1 | R_HQGVVVMGQKDSYVGD <small>EAQSK</small> .G + 2 Dimethyl:2H(4) (K); Dimethyl:2H(4) (N-term)                  |
| <input checked="" type="checkbox"/> | <a href="#">4389</a> | 651.5947 | 2602.3498 | 2602.3385 | 4.33  | 2 | (37) | 0.048    | 1 | R_HQGVVVMGQKDSYVGD <small>EAQSK</small> .G + 2 Dimethyl:2H(4) (K); Dimethyl:2H(4) (N-term)                  |
| <input checked="" type="checkbox"/> | <a href="#">4395</a> | 652.5742 | 2606.2677 | 2606.2581 | 3.69  | 2 | (43) | 0.0063   | 1 | R_HQGVVVMGQKDSYVGD <small>EAQSK</small> .G + 2 Dimethyl (K); Dimethyl (N-term); Oxidation (M)               |
| <input checked="" type="checkbox"/> | <a href="#">4396</a> | 652.5743 | 2606.2683 | 2606.2581 | 3.89  | 2 | 64   | 5.3e-005 | 1 | R_HQGVVVMGQKDSYVGD <small>EAQSK</small> .G + 2 Dimethyl (K); Dimethyl (N-term); Oxidation (M)               |
| <input checked="" type="checkbox"/> | <a href="#">4397</a> | 652.5744 | 2606.2685 | 2606.2581 | 3.99  | 2 | (35) | 0.042    | 1 | R_HQGVVVMGQKDSYVGD <small>EAQSK</small> .G + 2 Dimethyl (K); Dimethyl (N-term); Oxidation (M)               |
| <input checked="" type="checkbox"/> | <a href="#">4398</a> | 652.5747 | 2606.2697 | 2606.2581 | 4.46  | 2 | (37) | 0.026    | 1 | R_HQGVVVMGQKDSYVGD <small>EAQSK</small> .G + 2 Dimethyl (K); Dimethyl (N-term); Oxidation (M)               |
| <input checked="" type="checkbox"/> | <a href="#">4399</a> | 652.5747 | 2606.2697 | 2606.2581 | 4.46  | 2 | (41) | 0.013    | 1 | R_HQGVVVMGQKDSYVGD <small>EAQSK</small> .G + 2 Dimethyl (K); Dimethyl (N-term); Oxidation (M)               |
| <input checked="" type="checkbox"/> | <a href="#">4400</a> | 652.5748 | 2606.2700 | 2606.2581 | 4.55  | 2 | (51) | 0.0012   | 1 | R_HQGVVVMGQKDSYVGD <small>EAQSK</small> .G + 2 Dimethyl (K); Dimethyl (N-term); Oxidation (M)               |
| <input checked="" type="checkbox"/> | <a href="#">4408</a> | 655.5928 | 2618.3422 | 2618.3335 | 3.35  | 2 | (49) | 0.0029   | 1 | R_HQGVVVMGQKDSYVGD <small>EAQSK</small> .G + 2 Dimethyl:2H(4) (K); Dimethyl:2H(4) (N-term); Oxidation (M)   |
| <input checked="" type="checkbox"/> | <a href="#">4409</a> | 655.5930 | 2618.3427 | 2618.3335 | 3.54  | 2 | (53) | 0.0012   | 1 | R_HQGVVVMGQKDSYVGD <small>EAQSK</small> .G + 2 Dimethyl:2H(4) (K); Dimethyl:2H(4) (N-term); Oxidation (M)   |
| <input checked="" type="checkbox"/> | <a href="#">4410</a> | 655.5930 | 2618.3427 | 2618.3335 | 3.54  | 2 | (60) | 0.00023  | 1 | R_HQGVVVMGQKDSYVGD <small>EAQSK</small> .G + 2 Dimethyl:2H(4) (K); Dimethyl:2H(4) (N-term); Oxidation (M)   |
| <input checked="" type="checkbox"/> | <a href="#">4411</a> | 655.5932 | 2618.3437 | 2618.3335 | 3.92  | 2 | (36) | 0.058    | 1 | R_HQGVVVMGQKDSYVGD <small>EAQSK</small> .G + 2 Dimethyl:2H(4) (K); Dimethyl:2H(4) (N-term); Oxidation (M)   |
| <input checked="" type="checkbox"/> | <a href="#">4412</a> | 655.5933 | 2618.3439 | 2618.3335 | 4.01  | 2 | (29) | 0.28     | 1 | R_HQGVVVMGQKDSYVGD <small>EAQSK</small> .G + 2 Dimethyl:2H(4) (K); Dimethyl:2H(4) (N-term); Oxidation (M)   |
| <input checked="" type="checkbox"/> | <a href="#">4413</a> | 655.5933 | 2618.3439 | 2618.3335 | 4.01  | 2 | (44) | 0.0096   | 1 | R_HQGVVVMGQKDSYVGD <small>EAQSK</small> .G + 2 Dimethyl:2H(4) (K); Dimethyl:2H(4) (N-term); Oxidation (M)   |
| <input checked="" type="checkbox"/> | <a href="#">4417</a> | 656.5727 | 2622.2617 | 2622.2530 | 3.29  | 2 | (27) | 0.25     | 1 | R_HQGVVVMGQKDSYVGD <small>EAQSK</small> .G + 2 Dimethyl (K); Dimethyl (N-term); 2 Oxidation (M)             |
| <input checked="" type="checkbox"/> | <a href="#">4420</a> | 656.5734 | 2622.2646 | 2622.2530 | 4.41  | 2 | (28) | 0.19     | 1 | R_HQGVVVMGQKDSYVGD <small>EAQSK</small> .G + 2 Dimethyl (K); Dimethyl (N-term); 2 Oxidation (M)             |

|                                     |                      |          |           |           |      |   |      |       |   |                                                                                                          |
|-------------------------------------|----------------------|----------|-----------|-----------|------|---|------|-------|---|----------------------------------------------------------------------------------------------------------|
| <input checked="" type="checkbox"/> | <a href="#">4421</a> | 656.5735 | 2622.2647 | 2622.2530 | 4.46 | 2 | (33) | 0.068 | 1 | R_HQGVVVMGQKDSYVGDEAQS <del>K</del> R.G + 2 Dimethyl (K); Dimethyl (N-term); 2 Oxidation (M)             |
| <input checked="" type="checkbox"/> | <a href="#">4432</a> | 527.8740 | 2634.3337 | 2634.3284 | 2.04 | 2 | (33) | 0.11  | 1 | R_HQGVVVMGQKDSYVGDEAQS <del>K</del> R.G + 2 Dimethyl:2H(4) (K); Dimethyl:2H(4) (N-term); 2 Oxidation (M) |

2. [IPI00405227](#) Mass: 117215 Score: 1645 Queries matched: 81 emPAI: 3.11

Tax\_Id=10090 Gene\_Symbol=Vcl Vinculin

Check to include this hit in error tolerant search or archive report

| Query                               | Observed             | Mr(expt) | Mr(calc)  | ppm       | Miss | Score | Expect | Rank     | Peptide |                                                                                            |
|-------------------------------------|----------------------|----------|-----------|-----------|------|-------|--------|----------|---------|--------------------------------------------------------------------------------------------|
| <input checked="" type="checkbox"/> | <a href="#">449</a>  | 356.7715 | 711.5285  | 711.5258  | 3.82 | 0     | 29     | 0.012    | 1       | R_ILLVAK <del>R</del> .R + Dimethyl (K); Dimethyl (N-term)                                 |
| <input checked="" type="checkbox"/> | <a href="#">748</a>  | 292.9004 | 875.6793  | 875.6772  | 2.39 | 1     | 27     | 0.0071   | 1       | R_ILLVAK <del>R</del> .E + Dimethyl:2H(4) (K); Dimethyl:2H(4) (N-term)                     |
| <input checked="" type="checkbox"/> | <a href="#">900</a>  | 483.7501 | 965.4857  | 965.4818  | 4.07 | 0     | 40     | 0.0071   | 1       | R_DYLIDGSR.G + Dimethyl (N-term)                                                           |
| <input checked="" type="checkbox"/> | <a href="#">904</a>  | 485.7629 | 969.5113  | 969.5069  | 4.49 | 0     | (39)   | 0.011    | 1       | R_DYLIDGSR.G + Dimethyl:2H(4) (N-term)                                                     |
| <input checked="" type="checkbox"/> | <a href="#">923</a>  | 488.7572 | 975.4999  | 975.4964  | 3.59 | 0     | 30     | 0.092    | 1       | K_SFLDSGYR.I + Dimethyl:2H(4) (N-term)                                                     |
| <input checked="" type="checkbox"/> | <a href="#">1201</a> | 529.3002 | 1056.5859 | 1056.5815 | 4.19 | 0     | (38)   | 0.022    | 1       | K_NQGIEEALK <del>N</del> .N + Dimethyl (K); Dimethyl (N-term)                              |
| <input checked="" type="checkbox"/> | <a href="#">1217</a> | 533.3255 | 1064.6364 | 1064.6317 | 4.44 | 0     | 45     | 0.0053   | 1       | K_NQGIEEALK <del>N</del> .N + Dimethyl:2H(4) (K); Dimethyl:2H(4) (N-term)                  |
| <input checked="" type="checkbox"/> | <a href="#">1241</a> | 362.2218 | 1083.6436 | 1083.6400 | 3.30 | 1     | (56)   | 0.00042  | 1       | K_GNDIIAAAK <del>R</del> .M + Dimethyl (K); Dimethyl (N-term)                              |
| <input checked="" type="checkbox"/> | <a href="#">1255</a> | 364.9050 | 1091.6932 | 1091.6902 | 2.69 | 1     | 64     | 3.7e-005 | 1       | K_GNDIIAAAK <del>R</del> .M + Dimethyl:2H(4) (K); Dimethyl:2H(4) (N-term)                  |
| <input checked="" type="checkbox"/> | <a href="#">1382</a> | 569.3326 | 1136.6506 | 1136.6463 | 3.74 | 0     | 67     | 3.5e-005 | 1       | R_GQGASPVAMQK <del>A</del> .A + Dimethyl:2H(4) (K); Dimethyl:2H(4) (N-term)                |
| <input checked="" type="checkbox"/> | <a href="#">1400</a> | 573.3455 | 1144.6765 | 1144.6703 | 5.40 | 0     | (65)   | 5.5e-005 | 1       | R_SLGEIAALTSK <del>L</del> .L + Dimethyl (K); Dimethyl (N-term)                            |
| <input checked="" type="checkbox"/> | <a href="#">1408</a> | 574.8097 | 1147.6048 | 1147.5981 | 5.88 | 0     | 47     | 0.0026   | 1       | K_TISPMVMDAK <del>A</del> .A + Dimethyl (K); Dimethyl (N-term)                             |
| <input checked="" type="checkbox"/> | <a href="#">1426</a> | 577.3708 | 1152.7270 | 1152.7205 | 5.63 | 0     | 67     | 2.2e-005 | 1       | R_SLGEIAALTSK <del>L</del> .L + Dimethyl:2H(4) (K); Dimethyl:2H(4) (N-term)                |
| <input checked="" type="checkbox"/> | <a href="#">1431</a> | 578.8346 | 1155.6546 | 1155.6483 | 5.47 | 0     | (32)   | 0.14     | 1       | K_TISPMVMDAK <del>A</del> .A + Dimethyl:2H(4) (K); Dimethyl:2H(4) (N-term)                 |
| <input checked="" type="checkbox"/> | <a href="#">1448</a> | 582.8063 | 1163.5980 | 1163.5930 | 4.29 | 0     | (32)   | 0.075    | 1       | K_TISPMVMDAK <del>A</del> .A + Dimethyl (K); Dimethyl (N-term); Oxidation (M)              |
| <input checked="" type="checkbox"/> | <a href="#">1473</a> | 586.8316 | 1171.6487 | 1171.6432 | 4.63 | 0     | (31)   | 0.15     | 1       | K_TISPMVMDAK <del>A</del> .A + Dimethyl:2H(4) (K); Dimethyl:2H(4) (N-term); Oxidation (M)  |
| <input checked="" type="checkbox"/> | <a href="#">1474</a> | 586.8317 | 1171.6488 | 1171.6432 | 4.73 | 0     | (36)   | 0.044    | 1       | K_TISPMVMDAK <del>A</del> .A + Dimethyl:2H(4) (K); Dimethyl:2H(4) (N-term); Oxidation (M)  |
| <input checked="" type="checkbox"/> | <a href="#">1489</a> | 587.8402 | 1173.6659 | 1173.6605 | 4.58 | 0     | (61)   | 0.00013  | 1       | K_STVEGIQASV <del>K</del> .T + Dimethyl (K); Dimethyl (N-term)                             |
| <input checked="" type="checkbox"/> | <a href="#">1521</a> | 590.8011 | 1179.5876 | 1179.5814 | 5.31 | 0     | 48     | 0.0016   | 1       | R_MALLMAEMSR.L + Dimethyl (N-term)                                                         |
| <input checked="" type="checkbox"/> | <a href="#">1528</a> | 591.8654 | 1181.7162 | 1181.7107 | 4.60 | 0     | 66     | 3.7e-005 | 1       | K_STVEGIQASV <del>K</del> .T + Dimethyl:2H(4) (K); Dimethyl:2H(4) (N-term)                 |
| <input checked="" type="checkbox"/> | <a href="#">1535</a> | 592.8136 | 1183.6127 | 1183.6065 | 5.28 | 0     | (41)   | 0.0099   | 1       | R_MALLMAEMSR.L + Dimethyl:2H(4) (N-term)                                                   |
| <input checked="" type="checkbox"/> | <a href="#">1592</a> | 602.3276 | 1202.6407 | 1202.6329 | 6.54 | 0     | 44     | 0.007    | 1       | K_MSAEINEIIR.V + Dimethyl (N-term)                                                         |
| <input checked="" type="checkbox"/> | <a href="#">1637</a> | 606.8536 | 1211.6927 | 1211.6874 | 4.42 | 0     | 64     | 7.1e-005 | 1       | R_ELTPQVISAAR.I + Dimethyl (N-term)                                                        |
| <input checked="" type="checkbox"/> | <a href="#">1650</a> | 608.8666 | 1215.7187 | 1215.7125 | 5.14 | 0     | (38)   | 0.027    | 1       | R_ELTPQVISAAR.I + Dimethyl:2H(4) (N-term)                                                  |
| <input checked="" type="checkbox"/> | <a href="#">1858</a> | 629.8101 | 1257.6057 | 1257.5990 | 5.37 | 0     | 40     | 0.0062   | 1       | R_WIDNPTVDDR.G + Dimethyl (N-term)                                                         |
| <input checked="" type="checkbox"/> | <a href="#">1866</a> | 420.8993 | 1259.6761 | 1259.6721 | 3.20 | 1     | 29     | 0.25     | 1       | K_DIAKASDEVTR.L + Dimethyl (K); Dimethyl (N-term)                                          |
| <input checked="" type="checkbox"/> | <a href="#">1870</a> | 631.8226 | 1261.6306 | 1261.6241 | 5.15 | 0     | (36)   | 0.025    | 1       | R_WIDNPTVDDR.G + Dimethyl:2H(4) (N-term)                                                   |
| <input checked="" type="checkbox"/> | <a href="#">1891</a> | 635.4005 | 1268.7864 | 1268.7777 | 6.79 | 0     | 45     | 0.004    | 1       | K_ELLPVLISAMK <del>I</del> .I + Dimethyl (K); Dimethyl (N-term)                            |
| <input checked="" type="checkbox"/> | <a href="#">1913</a> | 639.4256 | 1276.8366 | 1276.8280 | 6.79 | 0     | (31)   | 0.041    | 1       | K_ELLPVLISAMK <del>I</del> .I + Dimethyl:2H(4) (K); Dimethyl:2H(4) (N-term)                |
| <input checked="" type="checkbox"/> | <a href="#">1947</a> | 647.4217 | 1292.8288 | 1292.8229 | 4.60 | 0     | (41)   | 0.0066   | 1       | K_ELLPVLISAMK <del>I</del> .I + Dimethyl:2H(4) (K); Dimethyl:2H(4) (N-term); Oxidation (M) |
| <input checked="" type="checkbox"/> | <a href="#">1960</a> | 650.3882 | 1298.7618 | 1298.7542 | 5.88 | 0     | 33     | 0.11     | 1       | R_VMLVNSMNTVK <del>E</del> .E + Dimethyl:2H(4) (K); Dimethyl:2H(4) (N-term)                |
| <input checked="" type="checkbox"/> | <a href="#">2039</a> | 442.5871 | 1324.7396 | 1324.7350 | 3.40 | 0     | (27)   | 0.38     | 1       | K_AVAGNISDPGLQK <del>S</del> .S + Dimethyl (K); Dimethyl (N-term)                          |
| <input checked="" type="checkbox"/> | <a href="#">2040</a> | 663.3779 | 1324.7412 | 1324.7350 | 4.63 | 0     | (57)   | 0.00044  | 1       | K_AVAGNISDPGLQK <del>S</del> .S + Dimethyl (K); Dimethyl (N-term)                          |
| <input checked="" type="checkbox"/> | <a href="#">2062</a> | 444.5868 | 1330.7385 | 1330.7343 | 3.15 | 1     | 53     | 0.00089  | 1       | R_EAVKKAASDELSK <del>T</del> .T + 2 Dimethyl (K); Dimethyl (N-term)                        |
| <input checked="" type="checkbox"/> | <a href="#">2072</a> | 667.4029 | 1332.7912 | 1332.7853 | 4.47 | 0     | 70     | 1.8e-005 | 1       | K_AVAGNISDPGLQK <del>S</del> .S + Dimethyl:2H(4) (K); Dimethyl:2H(4) (N-term)              |
| <input checked="" type="checkbox"/> | <a href="#">2106</a> | 448.6118 | 1342.8136 | 1342.8097 | 2.93 | 1     | (51)   | 0.0012   | 1       | R_EAVKKAASDELSK <del>T</del> .T + 2 Dimethyl:2H(4) (K); Dimethyl:2H(4) (N-term)            |
| <input checked="" type="checkbox"/> | <a href="#">2132</a> | 678.8844 | 1355.7542 | 1355.7458 | 6.23 | 0     | 44     | 0.0083   | 1       | K_MTGLVDEAIDTK <del>S</del> .S + Dimethyl:2H(4) (K); Dimethyl:2H(4) (N-term)               |

|   |                      |          |           |           |      |   |       |          |   |                                                                                 |
|---|----------------------|----------|-----------|-----------|------|---|-------|----------|---|---------------------------------------------------------------------------------|
| ✓ | <a href="#">2147</a> | 455.6034 | 1363.7884 | 1363.7846 | 2.78 | 1 | 38    | 0.031    | 1 | R_ARGQGASPVAMQK.A + Dimethyl:2H(4) (K); Dimethyl:2H(4) (N-term)                 |
| ✓ | <a href="#">2156</a> | 685.9078 | 1369.8010 | 1369.7929 | 5.92 | 0 | 64    | 6.9e-005 | 1 | K_QVATALQNLQTK.T + Dimethyl (K); Dimethyl (N-term)                              |
| ✓ | <a href="#">2196</a> | 689.9326 | 1377.8506 | 1377.8431 | 5.40 | 0 | (59)  | 0.00012  | 1 | K_QVATALQNLQTK.T + Dimethyl:2H(4) (K); Dimethyl:2H(4) (N-term)                  |
| ✓ | <a href="#">2222</a> | 463.2750 | 1386.8031 | 1386.7969 | 4.42 | 1 | (40)  | 0.017    | 1 | K_SLLDASEEAIKK.D + 2 Dimethyl (K); Dimethyl (N-term)                            |
| ✓ | <a href="#">2253</a> | 467.3000 | 1398.8781 | 1398.8723 | 4.18 | 1 | 44    | 0.0034   | 1 | K_SLLDASEEAIKK.D + 2 Dimethyl:2H(4) (K); Dimethyl:2H(4) (N-term)                |
| ✓ | <a href="#">2274</a> | 469.2381 | 1404.6926 | 1404.6885 | 2.90 | 1 | 27    | 0.21     | 1 | R_EVENSEDPKFR.E + Dimethyl (K); Dimethyl (N-term)                               |
| ✓ | <a href="#">2403</a> | 481.6259 | 1441.8560 | 1441.8504 | 3.90 | 1 | 31    | 0.13     | 1 | R_ALASIDSKLNQAK.G + 2 Dimethyl (K); Dimethyl (N-term)                           |
| ✓ | <a href="#">2450</a> | 485.6509 | 1453.9310 | 1453.9257 | 3.63 | 1 | (26)  | 0.15     | 1 | R_ALASIDSKLNQAK.G + 2 Dimethyl:2H(4) (K); Dimethyl:2H(4) (N-term)               |
| ✓ | <a href="#">2591</a> | 753.3811 | 1504.7477 | 1504.7378 | 6.61 | 0 | 89    | 1.4e-007 | 1 | K_MLGQMTDQVADLR.A + Dimethyl (N-term)                                           |
| ✓ | <a href="#">2606</a> | 755.3939 | 1508.7732 | 1508.7629 | 6.81 | 0 | (82)  | 9.2e-007 | 1 | K_MLGQMTDQVADLR.A + Dimethyl:2H(4) (N-term)                                     |
| ✓ | <a href="#">2621</a> | 757.4380 | 1512.8615 | 1512.8512 | 6.87 | 0 | (103) | 8.7e-009 | 1 | K_AQQVSQGLDVLTA.V + Dimethyl (K); Dimethyl (N-term)                             |
| ✓ | <a href="#">2645</a> | 761.4633 | 1520.9120 | 1520.9014 | 6.96 | 0 | 117   | 2.7e-010 | 1 | K_AQQVSQGLDVLTA.V + Dimethyl:2H(4) (K); Dimethyl:2H(4) (N-term)                 |
| ✓ | <a href="#">2681</a> | 769.3754 | 1536.7362 | 1536.7276 | 5.58 | 0 | (74)  | 3e-006   | 1 | K_MLGQMTDQVADLR.A + Dimethyl (N-term); 2 Oxidation (M)                          |
| ✓ | <a href="#">2691</a> | 771.3886 | 1540.7627 | 1540.7527 | 6.48 | 0 | (53)  | 0.00056  | 1 | K_MLGQMTDQVADLR.A + Dimethyl:2H(4) (N-term); 2 Oxidation (M)                    |
| ✓ | <a href="#">2712</a> | 775.8984 | 1549.7823 | 1549.7717 | 6.89 | 0 | 52    | 0.00089  | 1 | K_AGEVINQPMMAAR.Q + Dimethyl:2H(4) (N-term)                                     |
| ✓ | <a href="#">2720</a> | 519.6401 | 1555.8986 | 1555.8933 | 3.39 | 1 | (35)  | 0.057    | 1 | R_LGATAEKAAAVGTANK.S + 2 Dimethyl (K); Dimethyl (N-term)                        |
| ✓ | <a href="#">2745</a> | 523.6655 | 1567.9746 | 1567.9687 | 3.77 | 1 | 40    | 0.0085   | 1 | R_LGATAEKAAAVGTANK.S + 2 Dimethyl:2H(4) (K); Dimethyl:2H(4) (N-term)            |
| ✓ | <a href="#">2788</a> | 531.9963 | 1592.9672 | 1592.9589 | 5.22 | 1 | 36    | 0.034    | 1 | R_ALASQLQDSLKDLK.A + Dimethyl:2H(4) (K); Dimethyl:2H(4) (N-term)                |
| ✓ | <a href="#">3215</a> | 591.6741 | 1772.0004 | 1771.9931 | 4.10 | 1 | 38    | 0.035    | 1 | R_VGKETVQTTEDQILK.R + 2 Dimethyl (K); Dimethyl (N-term)                         |
| ✓ | <a href="#">3497</a> | 628.6982 | 1883.0727 | 1883.0612 | 6.10 | 1 | 28    | 0.29     | 1 | R_LANVMGPYRQDLLAK.C + Dimethyl:2H(4) (K); Dimethyl:2H(4) (N-term)               |
| ✓ | <a href="#">3557</a> | 478.0375 | 1908.1207 | 1908.1132 | 3.96 | 2 | (39)  | 0.015    | 1 | R_VGKETVQTTEDQILK.R + Dimethyl:2H(4) (K); Dimethyl:2H(4) (N-term)               |
| ✓ | <a href="#">3558</a> | 478.0375 | 1908.1209 | 1908.1132 | 4.06 | 2 | 49    | 0.0016   | 1 | R_VGKETVQTTEDQILK.R + Dimethyl:2H(4) (K); Dimethyl:2H(4) (N-term)               |
| ✓ | <a href="#">3597</a> | 486.0515 | 1940.1768 | 1940.1696 | 3.74 | 2 | (41)  | 0.0065   | 1 | R_VGKETVQTTEDQILK.R + 2 Dimethyl:2H(4) (K); Dimethyl:2H(4) (N-term)             |
| ✓ | <a href="#">3632</a> | 396.3979 | 1976.9532 | 1976.9486 | 2.32 | 1 | 30    | 0.13     | 1 | K_MIDERQQELTHQEHR.V + Dimethyl (N-term)                                         |
| ✓ | <a href="#">3663</a> | 499.2447 | 1992.9499 | 1992.9435 | 3.19 | 1 | (29)  | 0.12     | 1 | K_MIDERQQELTHQEHR.V + Dimethyl (N-term); Oxidation (M)                          |
| ✓ | <a href="#">3728</a> | 672.3625 | 2014.0657 | 2014.0534 | 6.12 | 1 | 25    | 0.73     | 1 | R_WIDNPTVDDRQVQAAIR.G + Dimethyl:2H(4) (N-term)                                 |
| ✓ | <a href="#">3791</a> | 680.0118 | 2037.0137 | 2037.0028 | 5.37 | 1 | 62    | 0.00011  | 1 | K_GWLRDPNASPGDAGEQAIR.Q + Dimethyl (N-term)                                     |
| ✓ | <a href="#">3801</a> | 681.3538 | 2041.0395 | 2041.0279 | 5.66 | 1 | (56)  | 0.00048  | 1 | K_GWLRDPNASPGDAGEQAIR.Q + Dimethyl:2H(4) (N-term)                               |
| ✓ | <a href="#">3867</a> | 690.7162 | 2069.1267 | 2069.1125 | 6.86 | 0 | (31)  | 0.2      | 1 | K_VAMANIQQPMLVAGATSIAR.R + Dimethyl (N-term)                                    |
| ✓ | <a href="#">3880</a> | 692.0575 | 2073.1507 | 2073.1376 | 6.31 | 0 | (47)  | 0.0039   | 1 | K_VAMANIQQPMLVAGATSIAR.R + Dimethyl:2H(4) (N-term)                              |
| ✓ | <a href="#">3881</a> | 692.0577 | 2073.1512 | 2073.1376 | 6.55 | 0 | 49    | 0.0028   | 1 | K_VAMANIQQPMLVAGATSIAR.R + Dimethyl:2H(4) (N-term)                              |
| ✓ | <a href="#">3957</a> | 718.7388 | 2153.1947 | 2153.1804 | 6.65 | 1 | (68)  | 3.6e-005 | 1 | K_AQQVSQGLDVLTA.KVENAAR.K + Dimethyl (K); Dimethyl (N-term)                     |
| ✓ | <a href="#">3958</a> | 718.7389 | 2153.1948 | 2153.1804 | 6.70 | 1 | 78    | 3.9e-006 | 1 | K_AQQVSQGLDVLTA.KVENAAR.K + Dimethyl (K); Dimethyl (N-term)                     |
| ✓ | <a href="#">3969</a> | 721.4222 | 2161.2447 | 2161.2306 | 6.52 | 1 | (61)  | 0.00011  | 1 | K_AQQVSQGLDVLTA.KVENAAR.K + Dimethyl:2H(4) (K); Dimethyl:2H(4) (N-term)         |
| ✓ | <a href="#">3970</a> | 721.4222 | 2161.2449 | 2161.2306 | 6.60 | 1 | (67)  | 2.9e-005 | 1 | K_AQQVSQGLDVLTA.KVENAAR.K + Dimethyl:2H(4) (K); Dimethyl:2H(4) (N-term)         |
| ✓ | <a href="#">4113</a> | 751.0674 | 2250.1805 | 2250.1644 | 7.14 | 1 | 58    | 0.00035  | 1 | K_AVAGNISDPGLQKSFLLDSGYR.I + Dimethyl (K); Dimethyl (N-term)                    |
| ✓ | <a href="#">4114</a> | 751.0679 | 2250.1817 | 2250.1644 | 7.69 | 1 | (48)  | 0.0036   | 1 | K_AVAGNISDPGLQKSFLLDSGYR.I + Dimethyl (K); Dimethyl (N-term)                    |
| ✓ | <a href="#">4119</a> | 753.7502 | 2258.2287 | 2258.2147 | 6.23 | 1 | (48)  | 0.0037   | 1 | K_AVAGNISDPGLQKSFLLDSGYR.I + Dimethyl:2H(4) (K); Dimethyl:2H(4) (N-term)        |
| ✓ | <a href="#">4120</a> | 753.7502 | 2258.2287 | 2258.2147 | 6.23 | 1 | (29)  | 0.3      | 1 | K_AVAGNISDPGLQKSFLLDSGYR.I + Dimethyl:2H(4) (K); Dimethyl:2H(4) (N-term)        |
| ✓ | <a href="#">4248</a> | 803.7575 | 2408.2507 | 2408.2336 | 7.13 | 1 | 43    | 0.011    | 1 | K_LLAVAATAPPDAPNREEVFDER.A + Dimethyl (N-term)                                  |
| ✓ | <a href="#">4255</a> | 805.0995 | 2412.2767 | 2412.2587 | 7.49 | 1 | (42)  | 0.016    | 1 | K_LLAVAATAPPDAPNREEVFDER.A + Dimethyl:2H(4) (N-term)                            |
| ✓ | <a href="#">4475</a> | 669.8619 | 2675.4184 | 2675.4018 | 6.20 | 2 | (38)  | 0.035    | 1 | R_VLQLTSWEDEAWASKDTEAMKR.A + 2 Dimethyl:2H(4) (K); Dimethyl:2H(4) (N-term)      |
| ✓ | <a href="#">4476</a> | 669.8621 | 2675.4194 | 2675.4018 | 6.57 | 2 | 67    | 4.6e-005 | 1 | R_VLQLTSWEDEAWASKDTEAMKR.A + 2 Dimethyl:2H(4) (K); Dimethyl:2H(4) (N-term)      |
| ✓ | <a href="#">4498</a> | 675.9139 | 2699.6267 | 2699.6124 | 5.28 | 2 | 29    | 0.031    | 1 | R_LGATAEKAAAVGTANKSTVEGIQASVK.T + 3 Dimethyl:2H(4) (K); Dimethyl:2H(4) (N-term) |

3. [IPI00131695](#) Mass: 70700 Score: 1179 Queries matched: 51 emPAI: 2.15

Tax\_Id=10090 Gene\_Symbol=Alb Serum albumin precursor

Check to include this hit in error tolerant search or archive report

| Query                                                    | Observed | Mr(expt)  | Mr(calc)  | ppm  | Miss | Score | Expect   | Rank | Peptide                                                                        |
|----------------------------------------------------------|----------|-----------|-----------|------|------|-------|----------|------|--------------------------------------------------------------------------------|
| <input checked="" type="checkbox"/> <a href="#">1083</a> | 514.8236 | 1027.6327 | 1027.6277 | 4.81 | 0    | (50)  | 0.0018   | 1    | K_QTALAE <del>L</del> VK.H + Dimethyl (K); Dimethyl (N-term)                   |
| <input checked="" type="checkbox"/> <a href="#">1084</a> | 514.8237 | 1027.6328 | 1027.6277 | 4.93 | 0    | (30)  | 0.19     | 1    | K_QTALAE <del>L</del> VK.H + Dimethyl (K); Dimethyl (N-term)                   |
| <input checked="" type="checkbox"/> <a href="#">1085</a> | 514.8240 | 1027.6335 | 1027.6277 | 5.64 | 0    | (50)  | 0.0018   | 1    | K_QTALAE <del>L</del> VK.H + Dimethyl (K); Dimethyl (N-term)                   |
| <input checked="" type="checkbox"/> <a href="#">1117</a> | 518.8486 | 1035.6827 | 1035.6779 | 4.60 | 0    | 50    | 0.0011   | 1    | K_QTALAE <del>L</del> VK.H + Dimethyl:2H(4) (K); Dimethyl:2H(4) (N-term)       |
| <input checked="" type="checkbox"/> <a href="#">1118</a> | 518.8488 | 1035.6831 | 1035.6779 | 4.96 | 0    | (49)  | 0.0015   | 1    | K_QTALAE <del>L</del> VK.H + Dimethyl:2H(4) (K); Dimethyl:2H(4) (N-term)       |
| <input checked="" type="checkbox"/> <a href="#">1119</a> | 518.8491 | 1035.6836 | 1035.6779 | 5.42 | 0    | (50)  | 0.0012   | 1    | K_QTALAE <del>L</del> VK.H + Dimethyl:2H(4) (K); Dimethyl:2H(4) (N-term)       |
| <input checked="" type="checkbox"/> <a href="#">1120</a> | 518.8492 | 1035.6838 | 1035.6779 | 5.66 | 0    | (36)  | 0.027    | 1    | K_QTALAE <del>L</del> VK.H + Dimethyl:2H(4) (K); Dimethyl:2H(4) (N-term)       |
| <a href="#">1228</a>                                     | 359.2197 | 1074.6372 | 1074.6338 | 3.12 | 1    | (29)  | 0.26     | 2    | R_AFKAWAVAR.L + Dimethyl (K); Dimethyl (N-term)                                |
| <input checked="" type="checkbox"/> <a href="#">1240</a> | 361.9030 | 1082.6873 | 1082.6840 | 3.02 | 1    | 31    | 0.1      | 1    | R_AFKAWAVAR.L + Dimethyl:2H(4) (K); Dimethyl:2H(4) (N-term)                    |
| <input checked="" type="checkbox"/> <a href="#">1538</a> | 395.5932 | 1183.7577 | 1183.7540 | 3.14 | 1    | 51    | 0.00081  | 1    | K_KQTALAE <del>L</del> VK.H + 2 Dimethyl (K); Dimethyl (N-term)                |
| <input checked="" type="checkbox"/> <a href="#">1539</a> | 592.8867 | 1183.7589 | 1183.7540 | 4.15 | 1    | (26)  | 0.27     | 1    | K_KQTALAE <del>L</del> VK.H + 2 Dimethyl (K); Dimethyl (N-term)                |
| <a href="#">1543</a>                                     | 396.2527 | 1185.7364 | 1185.7332 | 2.67 | 1    | (29)  | 0.15     | 2    | K_LATDLTKV <del>N</del> K.E + 2 Dimethyl (K); Dimethyl (N-term)                |
| <input checked="" type="checkbox"/> <a href="#">1567</a> | 399.6184 | 1195.8333 | 1195.8293 | 3.33 | 1    | (36)  | 0.0065   | 1    | K_KQTALAE <del>L</del> VK.H + 2 Dimethyl:2H(4) (K); Dimethyl:2H(4) (N-term)    |
| <input checked="" type="checkbox"/> <a href="#">1568</a> | 598.9248 | 1195.8351 | 1195.8293 | 4.80 | 1    | (25)  | 0.083    | 1    | K_KQTALAE <del>L</del> VK.H + 2 Dimethyl:2H(4) (K); Dimethyl:2H(4) (N-term)    |
| <input checked="" type="checkbox"/> <a href="#">1578</a> | 400.2780 | 1197.8122 | 1197.8086 | 3.02 | 1    | 39    | 0.0054   | 1    | K_LATDLTKV <del>N</del> K.E + 2 Dimethyl:2H(4) (K); Dimethyl:2H(4) (N-term)    |
| <input checked="" type="checkbox"/> <a href="#">1600</a> | 603.3456 | 1204.6767 | 1204.6703 | 5.31 | 0    | (38)  | 0.033    | 1    | K_LVQEVTDFAK.T + Dimethyl (K); Dimethyl (N-term)                               |
| <input checked="" type="checkbox"/> <a href="#">1644</a> | 607.3706 | 1212.7267 | 1212.7206 | 5.08 | 0    | 56    | 0.00051  | 1    | K_LVQEVTDFAK.T + Dimethyl:2H(4) (K); Dimethyl:2H(4) (N-term)                   |
| <input checked="" type="checkbox"/> <a href="#">1984</a> | 436.2204 | 1305.6393 | 1305.6353 | 3.02 | 0    | (38)  | 0.012    | 1    | R_YNDLGEQHF <del>K</del> .G + Dimethyl (K); Dimethyl (N-term)                  |
| <input checked="" type="checkbox"/> <a href="#">2018</a> | 438.9039 | 1313.6898 | 1313.6856 | 3.21 | 0    | 48    | 0.0023   | 1    | R_YNDLGEQHF <del>K</del> .G + Dimethyl:2H(4) (K); Dimethyl:2H(4) (N-term)      |
| <input checked="" type="checkbox"/> <a href="#">2478</a> | 489.9455 | 1466.8147 | 1466.8093 | 3.71 | 0    | (38)  | 0.035    | 1    | K_APQVSTPTLVEAAR.N + Dimethyl (N-term)                                         |
| <input checked="" type="checkbox"/> <a href="#">2479</a> | 734.4156 | 1466.8167 | 1466.8093 | 5.07 | 0    | 47    | 0.0036   | 1    | K_APQVSTPTLVEAAR.N + Dimethyl (N-term)                                         |
| <input checked="" type="checkbox"/> <a href="#">2499</a> | 491.2872 | 1470.8399 | 1470.8344 | 3.72 | 0    | (26)  | 0.55     | 1    | K_APQVSTPTLVEAAR.N + Dimethyl:2H(4) (N-term)                                   |
| <input checked="" type="checkbox"/> <a href="#">2500</a> | 736.4282 | 1470.8419 | 1470.8344 | 5.10 | 0    | (35)  | 0.064    | 1    | K_APQVSTPTLVEAAR.N + Dimethyl:2H(4) (N-term)                                   |
| <input checked="" type="checkbox"/> <a href="#">2524</a> | 495.2865 | 1482.8377 | 1482.8307 | 4.75 | 1    | 67    | 4.1e-005 | 1    | R_RHPDYSVSLLLR.L + Dimethyl (N-term)                                           |
| <input checked="" type="checkbox"/> <a href="#">2532</a> | 744.3506 | 1486.6866 | 1486.6796 | 4.75 | 0    | (72)  | 3.1e-006 | 1    | K_YMCENQATISS <del>K</del> .L + Dimethyl (K); Dimethyl (N-term)                |
| <input checked="" type="checkbox"/> <a href="#">2535</a> | 496.6284 | 1486.8635 | 1486.8558 | 5.19 | 1    | (64)  | 7.8e-005 | 1    | R_RHPDYSVSLLLR.L + Dimethyl:2H(4) (N-term)                                     |
| <input checked="" type="checkbox"/> <a href="#">2559</a> | 748.3759 | 1494.7372 | 1494.7298 | 4.92 | 0    | 78    | 1.9e-006 | 1    | K_YMCENQATISS <del>K</del> .L + Dimethyl:2H(4) (K); Dimethyl:2H(4) (N-term)    |
| <input checked="" type="checkbox"/> <a href="#">2598</a> | 754.4219 | 1506.8292 | 1506.8194 | 6.47 | 0    | (82)  | 1.3e-006 | 1    | K_LGEYGFQNA <del>L</del> LVR.Y + Dimethyl (N-term)                             |
| <input checked="" type="checkbox"/> <a href="#">2599</a> | 754.4231 | 1506.8317 | 1506.8194 | 8.15 | 0    | 104   | 8.6e-009 | 1    | K_LGEYGFQNA <del>L</del> LVR.Y + Dimethyl (N-term)                             |
| <input checked="" type="checkbox"/> <a href="#">2616</a> | 756.4342 | 1510.8539 | 1510.8446 | 6.15 | 0    | (77)  | 3.8e-006 | 1    | K_LGEYGFQNA <del>L</del> LVR.Y + Dimethyl:2H(4) (N-term)                       |
| <input checked="" type="checkbox"/> <a href="#">2617</a> | 756.4363 | 1510.8580 | 1510.8446 | 8.90 | 0    | (89)  | 2.5e-007 | 1    | K_LGEYGFQNA <del>L</del> LVR.Y + Dimethyl:2H(4) (N-term)                       |
| <input checked="" type="checkbox"/> <a href="#">3088</a> | 857.4602 | 1712.9059 | 1712.8923 | 7.91 | 0    | (81)  | 2e-006   | 1    | R_LSQTFPNADFAEIT <del>K</del> .L + Dimethyl:2H(4) (N-term)                     |
| <input checked="" type="checkbox"/> <a href="#">3135</a> | 579.9767 | 1736.9084 | 1736.8985 | 5.71 | 0    | (52)  | 0.0014   | 1    | R_LSQTFPNADFAEIT <del>K</del> .L + Dimethyl (K); Dimethyl (N-term)             |
| <input checked="" type="checkbox"/> <a href="#">3136</a> | 579.9770 | 1736.9093 | 1736.8985 | 6.24 | 0    | (56)  | 0.00056  | 1    | R_LSQTFPNADFAEIT <del>K</del> .L + Dimethyl (K); Dimethyl (N-term)             |
| <input checked="" type="checkbox"/> <a href="#">3137</a> | 869.4637 | 1736.9128 | 1736.8985 | 8.25 | 0    | (57)  | 0.00044  | 1    | R_LSQTFPNADFAEIT <del>K</del> .L + Dimethyl (K); Dimethyl (N-term)             |
| <input checked="" type="checkbox"/> <a href="#">3157</a> | 582.6603 | 1744.9592 | 1744.9487 | 6.00 | 0    | (59)  | 0.00033  | 1    | R_LSQTFPNADFAEIT <del>K</del> .L + Dimethyl:2H(4) (K); Dimethyl:2H(4) (N-term) |
| <input checked="" type="checkbox"/> <a href="#">3158</a> | 582.6604 | 1744.9594 | 1744.9487 | 6.11 | 0    | 82    | 1.6e-006 | 1    | R_LSQTFPNADFAEIT <del>K</del> .L + Dimethyl:2H(4) (K); Dimethyl:2H(4) (N-term) |
| <input checked="" type="checkbox"/> <a href="#">3159</a> | 873.4886 | 1744.9626 | 1744.9487 | 7.97 | 0    | (55)  | 0.0007   | 1    | R_LSQTFPNADFAEIT <del>K</del> .L + Dimethyl:2H(4) (K); Dimethyl:2H(4) (N-term) |
| <input checked="" type="checkbox"/> <a href="#">3590</a> | 647.0078 | 1938.0017 | 1937.9921 | 4.97 | 0    | 31    | 0.16     | 1    | R_RPCFSALTVD <del>E</del> TVPK.E + Dimethyl (K); Dimethyl (N-term)             |
| <input checked="" type="checkbox"/> <a href="#">3729</a> | 672.7122 | 2015.1146 | 2015.1051 | 4.73 | 1    | 57    | 0.00042  | 1    | R_YTQKAPQVSTPTLVEAAR.N + Dimethyl (K); Dimethyl (N-term)                       |



|                                     |                      |          |           |           |       |   |      |          |   |                                                                      |
|-------------------------------------|----------------------|----------|-----------|-----------|-------|---|------|----------|---|----------------------------------------------------------------------|
| <input checked="" type="checkbox"/> | <a href="#">3730</a> | 672.7122 | 2015.1147 | 2015.1051 | 4.77  | 1 | (53) | 0.0011   | 1 | R_YTQKAPQVSTPTLVEAAR.N + Dimethyl (K); Dimethyl (N-term)             |
| <input checked="" type="checkbox"/> | <a href="#">3731</a> | 672.7129 | 2015.1167 | 2015.1051 | 5.76  | 1 | (49) | 0.0028   | 1 | R_YTQKAPQVSTPTLVEAAR.N + Dimethyl (K); Dimethyl (N-term)             |
| <input checked="" type="checkbox"/> | <a href="#">3732</a> | 672.7129 | 2015.1168 | 2015.1051 | 5.82  | 1 | (49) | 0.0026   | 1 | R_YTQKAPQVSTPTLVEAAR.N + Dimethyl (K); Dimethyl (N-term)             |
| <input checked="" type="checkbox"/> | <a href="#">3752</a> | 674.0498 | 2019.1277 | 2019.1302 | -1.24 | 1 | (40) | 0.021    | 1 | R_YTQKAPQVSTPTLVEAAR.N + Dimethyl (K); Dimethyl:2H(4) (N-term)       |
| <input checked="" type="checkbox"/> | <a href="#">3764</a> | 675.3959 | 2023.1657 | 2023.1554 | 5.13  | 1 | (52) | 0.00094  | 1 | R_YTQKAPQVSTPTLVEAAR.N + Dimethyl:2H(4) (K); Dimethyl:2H(4) (N-term) |
| <input checked="" type="checkbox"/> | <a href="#">3765</a> | 675.3959 | 2023.1660 | 2023.1554 | 5.25  | 1 | (55) | 0.00049  | 1 | R_YTQKAPQVSTPTLVEAAR.N + Dimethyl:2H(4) (K); Dimethyl:2H(4) (N-term) |
| <input checked="" type="checkbox"/> | <a href="#">3766</a> | 675.3959 | 2023.1660 | 2023.1554 | 5.25  | 1 | (41) | 0.012    | 1 | R_YTQKAPQVSTPTLVEAAR.N + Dimethyl:2H(4) (K); Dimethyl:2H(4) (N-term) |
| <input checked="" type="checkbox"/> | <a href="#">3767</a> | 675.3961 | 2023.1663 | 2023.1554 | 5.43  | 1 | (45) | 0.0047   | 1 | R_YTQKAPQVSTPTLVEAAR.N + Dimethyl:2H(4) (K); Dimethyl:2H(4) (N-term) |
| <input checked="" type="checkbox"/> | <a href="#">3768</a> | 675.3961 | 2023.1665 | 2023.1554 | 5.52  | 1 | (57) | 0.00031  | 1 | R_YTQKAPQVSTPTLVEAAR.N + Dimethyl:2H(4) (K); Dimethyl:2H(4) (N-term) |
| <input checked="" type="checkbox"/> | <a href="#">4304</a> | 819.4523 | 2455.3352 | 2455.3148 | 8.29  | 1 | 46   | 0.0047   | 1 | R_LSQTFPNADFAEITKLATDLTK.V + Dimethyl:2H(4) (N-term)                 |
| <input checked="" type="checkbox"/> | <a href="#">4358</a> | 853.7758 | 2558.3056 | 2558.2839 | 8.50  | 1 | 69   | 2.8e-005 | 1 | K_TNCDLYEKLGEGYGFQNALIVR.Y + Dimethyl (K); Dimethyl (N-term)         |

4. [IPI00131830](#) Mass: 47021 Score: 1124 Queries matched: 49 emPAI: 2.80

Tax\_Id=10090 Gene\_Symbol=Serpina3k Serine protease inhibitor A3K precursor

Check to include this hit in error tolerant search or archive report

| Query                               | Observed             | Mr(expt) | Mr(calc)  | ppm       | Miss | Score | Expect | Rank     | Peptide |                                                                   |
|-------------------------------------|----------------------|----------|-----------|-----------|------|-------|--------|----------|---------|-------------------------------------------------------------------|
| <input checked="" type="checkbox"/> | <a href="#">1060</a> | 339.2324 | 1014.6753 | 1014.6723 | 2.91 | 1     | 25     | 0.21     | 1       | R_SVKVPMKM.M + 2 Dimethyl:2H(4) (K); Dimethyl:2H(4) (N-term)      |
| <input checked="" type="checkbox"/> | <a href="#">1174</a> | 351.5546 | 1051.6420 | 1051.6390 | 2.83 | 0     | (44)   | 0.0062   | 1       | K_LSVSQVVK.A + Dimethyl (K); Dimethyl (N-term)                    |
| <input checked="" type="checkbox"/> | <a href="#">1175</a> | 351.5548 | 1051.6426 | 1051.6390 | 3.45 | 0     | 55     | 0.00054  | 1       | K_LSVSQVVK.A + Dimethyl (K); Dimethyl (N-term)                    |
| <input checked="" type="checkbox"/> | <a href="#">1210</a> | 354.2380 | 1059.6923 | 1059.6892 | 2.90 | 0     | (41)   | 0.009    | 1       | K_LSVSQVVK.A + Dimethyl:2H(4) (K); Dimethyl:2H(4) (N-term)        |
| <input checked="" type="checkbox"/> | <a href="#">1611</a> | 302.9493 | 1207.7680 | 1207.7652 | 2.31 | 1     | (50)   | 0.0012   | 1       | K_KLSVSVVVK.A + 2 Dimethyl (K); Dimethyl (N-term)                 |
| <input checked="" type="checkbox"/> | <a href="#">1612</a> | 403.5966 | 1207.7680 | 1207.7652 | 2.31 | 1     | (36)   | 0.03     | 1       | K_KLSVSVVVK.A + 2 Dimethyl (K); Dimethyl (N-term)                 |
| <input checked="" type="checkbox"/> | <a href="#">1613</a> | 403.5969 | 1207.7688 | 1207.7652 | 2.93 | 1     | (26)   | 0.24     | 1       | K_KLSVSVVVK.A + 2 Dimethyl (K); Dimethyl (N-term)                 |
| <input checked="" type="checkbox"/> | <a href="#">1681</a> | 305.9680 | 1219.8431 | 1219.8406 | 2.05 | 1     | 57     | 6.9e-005 | 1       | K_KLSVSVVVK.A + 2 Dimethyl:2H(4) (K); Dimethyl:2H(4) (N-term)     |
| <input checked="" type="checkbox"/> | <a href="#">1682</a> | 407.6218 | 1219.8436 | 1219.8406 | 2.44 | 1     | (38)   | 0.0053   | 1       | K_KLSVSVVVK.A + 2 Dimethyl:2H(4) (K); Dimethyl:2H(4) (N-term)     |
| <input checked="" type="checkbox"/> | <a href="#">1683</a> | 407.6220 | 1219.8441 | 1219.8406 | 2.89 | 1     | (37)   | 0.005    | 1       | K_KLSVSVVVK.A + 2 Dimethyl:2H(4) (K); Dimethyl:2H(4) (N-term)     |
| <input checked="" type="checkbox"/> | <a href="#">2949</a> | 553.2935 | 1656.8587 | 1656.8505 | 4.98 | 0     | (27)   | 0.37     | 1       | R_MQQVEASLQPETLR.K + Dimethyl (N-term)                            |
| <input checked="" type="checkbox"/> | <a href="#">2950</a> | 553.2939 | 1656.8597 | 1656.8505 | 5.58 | 0     | (35)   | 0.055    | 1       | R_MQQVEASLQPETLR.K + Dimethyl (N-term)                            |
| <input checked="" type="checkbox"/> | <a href="#">2951</a> | 829.4385 | 1656.8624 | 1656.8505 | 7.20 | 0     | 80     | 2.1e-006 | 1       | R_MQQVEASLQPETLR.K + Dimethyl (N-term)                            |
| <input checked="" type="checkbox"/> | <a href="#">2969</a> | 831.4504 | 1660.8862 | 1660.8756 | 6.39 | 0     | (70)   | 2e-005   | 1       | R_MQQVEASLQPETLR.K + Dimethyl:2H(4) (N-term)                      |
| <input checked="" type="checkbox"/> | <a href="#">3003</a> | 839.4479 | 1676.8813 | 1676.8705 | 6.45 | 0     | (53)   | 0.0012   | 1       | R_MQQVEASLQPETLR.K + Dimethyl:2H(4) (N-term); Oxidation (M)       |
| <input checked="" type="checkbox"/> | <a href="#">3020</a> | 562.3248 | 1683.9525 | 1683.9447 | 4.62 | 0     | (46)   | 0.0051   | 1       | K_TLFPSQIEELNLPK.F + Dimethyl (K); Dimethyl (N-term)              |
| <input checked="" type="checkbox"/> | <a href="#">3021</a> | 562.3256 | 1683.9549 | 1683.9447 | 6.04 | 0     | (57)   | 0.00045  | 1       | K_TLFPSQIEELNLPK.F + Dimethyl (K); Dimethyl (N-term)              |
| <input checked="" type="checkbox"/> | <a href="#">3022</a> | 842.9871 | 1683.9597 | 1683.9447 | 8.91 | 0     | (99)   | 2.8e-008 | 1       | K_TLFPSQIEELNLPK.F + Dimethyl (K); Dimethyl (N-term)              |
| <input checked="" type="checkbox"/> | <a href="#">3042</a> | 565.0081 | 1692.0025 | 1691.9949 | 4.49 | 0     | (49)   | 0.0018   | 1       | K_TLFPSQIEELNLPK.F + Dimethyl:2H(4) (K); Dimethyl:2H(4) (N-term)  |
| <input checked="" type="checkbox"/> | <a href="#">3043</a> | 565.0088 | 1692.0045 | 1691.9949 | 5.68 | 0     | (56)   | 0.00037  | 1       | K_TLFPSQIEELNLPK.F + Dimethyl:2H(4) (K); Dimethyl:2H(4) (N-term)  |
| <input checked="" type="checkbox"/> | <a href="#">3044</a> | 565.0090 | 1692.0051 | 1691.9949 | 6.01 | 0     | (53)   | 0.0007   | 1       | K_TLFPSQIEELNLPK.F + Dimethyl:2H(4) (K); Dimethyl:2H(4) (N-term)  |
| <input checked="" type="checkbox"/> | <a href="#">3045</a> | 847.0112 | 1692.0078 | 1691.9949 | 7.60 | 0     | 112    | 8.6e-010 | 1       | K_TLFPSQIEELNLPK.F + Dimethyl:2H(4) (K); Dimethyl:2H(4) (N-term)  |
| <input checked="" type="checkbox"/> | <a href="#">3289</a> | 605.3359 | 1812.9858 | 1812.9767 | 5.00 | 1     | (51)   | 0.0017   | 1       | R_MQQVEASLQPETLRK.W + Dimethyl (K); Dimethyl (N-term)             |
| <input checked="" type="checkbox"/> | <a href="#">3290</a> | 605.3363 | 1812.9871 | 1812.9767 | 5.71 | 1     | (60)   | 0.00023  | 1       | R_MQQVEASLQPETLRK.W + Dimethyl (K); Dimethyl (N-term)             |
| <input checked="" type="checkbox"/> | <a href="#">3318</a> | 608.0194 | 1821.0364 | 1821.0270 | 5.18 | 1     | (49)   | 0.0024   | 1       | R_MQQVEASLQPETLRK.W + Dimethyl:2H(4) (K); Dimethyl:2H(4) (N-term) |
| <input checked="" type="checkbox"/> | <a href="#">3319</a> | 608.0195 | 1821.0366 | 1821.0270 | 5.28 | 1     | 68     | 3.2e-005 | 1       | R_MQQVEASLQPETLRK.W + Dimethyl:2H(4) (K); Dimethyl:2H(4) (N-term) |
| <input checked="" type="checkbox"/> | <a href="#">3372</a> | 614.3677 | 1840.0814 | 1840.0709 | 5.68 | 1     | (44)   | 0.0053   | 1       | R_KTLFPSQIEELNLPK.F + 2 Dimethyl (K); Dimethyl (N-term)           |
| <input checked="" type="checkbox"/> | <a href="#">3373</a> | 614.3678 | 1840.0817 | 1840.0709 | 5.86 | 1     | (53)   | 0.00073  | 1       | R_KTLFPSQIEELNLPK.F + 2 Dimethyl (K); Dimethyl (N-term)           |

|                                     |                      |          |           |           |      |   |      |          |   |                                                                            |
|-------------------------------------|----------------------|----------|-----------|-----------|------|---|------|----------|---|----------------------------------------------------------------------------|
| <input checked="" type="checkbox"/> | <a href="#">3374</a> | 614.3682 | 1840.0827 | 1840.0709 | 6.40 | 1 | (52) | 0.00097  | 1 | R_KTLFPPSQIEELNLPK.F + 2 Dimethyl (K); Dimethyl (N-term)                   |
| <input checked="" type="checkbox"/> | <a href="#">3375</a> | 614.3683 | 1840.0832 | 1840.0709 | 6.67 | 1 | (54) | 0.00057  | 1 | R_KTLFPPSQIEELNLPK.F + 2 Dimethyl (K); Dimethyl (N-term)                   |
| <input checked="" type="checkbox"/> | <a href="#">3408</a> | 618.3925 | 1852.1557 | 1852.1463 | 5.10 | 1 | 55   | 0.00014  | 1 | R_KTLFPPSQIEELNLPK.F + 2 Dimethyl:2H(4) (K); Dimethyl:2H(4) (N-term)       |
| <input checked="" type="checkbox"/> | <a href="#">3409</a> | 618.3926 | 1852.1561 | 1852.1463 | 5.29 | 1 | (41) | 0.0034   | 1 | R_KTLFPPSQIEELNLPK.F + 2 Dimethyl:2H(4) (K); Dimethyl:2H(4) (N-term)       |
| <input checked="" type="checkbox"/> | <a href="#">3410</a> | 618.3936 | 1852.1588 | 1852.1463 | 6.77 | 1 | (50) | 0.00032  | 1 | R_KTLFPPSQIEELNLPK.F + 2 Dimethyl:2H(4) (K); Dimethyl:2H(4) (N-term)       |
| <input checked="" type="checkbox"/> | <a href="#">3983</a> | 724.0675 | 2169.1807 | 2169.1641 | 7.66 | 0 | 99   | 3e-008   | 1 | K_AVLDVAETGTEAAAATGVIGGIR.K + Dimethyl (N-term)                            |
| <input checked="" type="checkbox"/> | <a href="#">3992</a> | 725.4079 | 2173.2017 | 2173.1892 | 5.75 | 0 | (44) | 0.0093   | 1 | K_AVLDVAETGTEAAAATGVIGGIR.K + Dimethyl:2H(4) (N-term)                      |
| <input checked="" type="checkbox"/> | <a href="#">3993</a> | 725.4086 | 2173.2039 | 2173.1892 | 6.74 | 0 | (39) | 0.025    | 1 | K_AVLDVAETGTEAAAATGVIGGIR.K + Dimethyl:2H(4) (N-term)                      |
| <input checked="" type="checkbox"/> | <a href="#">3994</a> | 725.4093 | 2173.2061 | 2173.1892 | 7.75 | 0 | (35) | 0.07     | 1 | K_AVLDVAETGTEAAAATGVIGGIR.K + Dimethyl:2H(4) (N-term)                      |
| <input checked="" type="checkbox"/> | <a href="#">4003</a> | 731.0383 | 2190.0932 | 2190.0783 | 6.80 | 0 | (35) | 0.047    | 1 | R_ALYQTEAFTADFQQPTEAK.N + Dimethyl:2H(4) (N-term)                          |
| <input checked="" type="checkbox"/> | <a href="#">4046</a> | 739.0402 | 2214.0987 | 2214.0844 | 6.45 | 0 | 67   | 3.3e-005 | 1 | R_ALYQTEAFTADFQQPTEAK.N + Dimethyl (K); Dimethyl (N-term)                  |
| <input checked="" type="checkbox"/> | <a href="#">4047</a> | 739.0405 | 2214.0996 | 2214.0844 | 6.83 | 0 | (62) | 0.0001   | 1 | R_ALYQTEAFTADFQQPTEAK.N + Dimethyl (K); Dimethyl (N-term)                  |
| <input checked="" type="checkbox"/> | <a href="#">4048</a> | 739.0406 | 2214.1001 | 2214.0844 | 7.08 | 0 | (58) | 0.00029  | 1 | R_ALYQTEAFTADFQQPTEAK.N + Dimethyl (K); Dimethyl (N-term)                  |
| <input checked="" type="checkbox"/> | <a href="#">4049</a> | 739.0408 | 2214.1007 | 2214.0844 | 7.35 | 0 | (59) | 0.00024  | 1 | R_ALYQTEAFTADFQQPTEAK.N + Dimethyl (K); Dimethyl (N-term)                  |
| <input checked="" type="checkbox"/> | <a href="#">4074</a> | 741.7238 | 2222.1496 | 2222.1347 | 6.72 | 0 | (51) | 0.0019   | 1 | R_ALYQTEAFTADFQQPTEAK.N + Dimethyl:2H(4) (K); Dimethyl:2H(4) (N-term)      |
| <input checked="" type="checkbox"/> | <a href="#">4075</a> | 741.7238 | 2222.1497 | 2222.1347 | 6.77 | 0 | (34) | 0.086    | 1 | R_ALYQTEAFTADFQQPTEAK.N + Dimethyl:2H(4) (K); Dimethyl:2H(4) (N-term)      |
| <input checked="" type="checkbox"/> | <a href="#">4076</a> | 741.7238 | 2222.1497 | 2222.1347 | 6.77 | 0 | (42) | 0.012    | 1 | R_ALYQTEAFTADFQQPTEAK.N + Dimethyl:2H(4) (K); Dimethyl:2H(4) (N-term)      |
| <input checked="" type="checkbox"/> | <a href="#">4077</a> | 741.7239 | 2222.1498 | 2222.1347 | 6.81 | 0 | (54) | 0.00091  | 1 | R_ALYQTEAFTADFQQPTEAK.N + Dimethyl:2H(4) (K); Dimethyl:2H(4) (N-term)      |
| <input checked="" type="checkbox"/> | <a href="#">4166</a> | 776.1102 | 2325.3087 | 2325.2904 | 7.88 | 1 | (66) | 4.2e-005 | 1 | K_AVLDVAETGTEAAAATGVIGGIRK.A + Dimethyl (K); Dimethyl (N-term)             |
| <input checked="" type="checkbox"/> | <a href="#">4167</a> | 776.1102 | 2325.3087 | 2325.2904 | 7.90 | 1 | (62) | 0.0001   | 1 | K_AVLDVAETGTEAAAATGVIGGIRK.A + Dimethyl (K); Dimethyl (N-term)             |
| <input checked="" type="checkbox"/> | <a href="#">4174</a> | 778.7931 | 2333.3574 | 2333.3406 | 7.22 | 1 | 69   | 1.3e-005 | 1 | K_AVLDVAETGTEAAAATGVIGGIRK.A + Dimethyl:2H(4) (K); Dimethyl:2H(4) (N-term) |

5. [IPI00465786](#) Mass: 271832 Score: 808 Queries matched: 34 emPAI: 0.29

Tax\_Id=10090 Gene\_Symbol=Tln1 Talin-1

Check to include this hit in error tolerant search or archive report

| Query                               | Observed             | Mr(expt) | Mr(calc)  | ppm       | Miss | Score | Expect | Rank     | Peptide |                                                               |
|-------------------------------------|----------------------|----------|-----------|-----------|------|-------|--------|----------|---------|---------------------------------------------------------------|
| <input checked="" type="checkbox"/> | <a href="#">1248</a> | 543.3221 | 1084.6296 | 1084.6240 | 5.15 | 0     | (54)   | 0.00077  | 1       | K_NLGTALAE LR.T + Dimethyl (N-term)                           |
| <input checked="" type="checkbox"/> | <a href="#">1253</a> | 545.3346 | 1088.6547 | 1088.6491 | 5.13 | 0     | 61     | 0.00015  | 1       | K_NLGTALAE LR.T + Dimethyl:2H(4) (N-term)                     |
| <input checked="" type="checkbox"/> | <a href="#">1265</a> | 548.3677 | 1094.7209 | 1094.7151 | 5.36 | 0     | 28     | 0.13     | 1       | K_SIAAATSALVK.A + Dimethyl:2H(4) (K); Dimethyl:2H(4) (N-term) |
| <input checked="" type="checkbox"/> | <a href="#">1323</a> | 557.3376 | 1112.6607 | 1112.6553 | 4.86 | 0     | (61)   | 0.00016  | 1       | K_GLAGAVSELLR.S + Dimethyl (N-term)                           |
| <input checked="" type="checkbox"/> | <a href="#">1335</a> | 559.3502 | 1116.6858 | 1116.6805 | 4.76 | 0     | 69     | 2.3e-005 | 1       | K_GLAGAVSELLR.S + Dimethyl:2H(4) (N-term)                     |
| <input checked="" type="checkbox"/> | <a href="#">1559</a> | 597.3780 | 1192.7414 | 1192.7341 | 6.17 | 0     | 45     | 0.0038   | 1       | R_AAMEPIVISAK.T + Dimethyl:2H(4) (K); Dimethyl:2H(4) (N-term) |
| <input checked="" type="checkbox"/> | <a href="#">1585</a> | 601.3457 | 1200.6769 | 1200.6714 | 4.57 | 0     | 54     | 0.0008   | 1       | K_EVANSTANLVK.T + Dimethyl (K); Dimethyl (N-term)             |
| <input checked="" type="checkbox"/> | <a href="#">1619</a> | 605.3707 | 1208.7268 | 1208.7216 | 4.28 | 0     | (51)   | 0.0013   | 1       | K_EVANSTANLVK.T + Dimethyl:2H(4) (K); Dimethyl:2H(4) (N-term) |
| <input checked="" type="checkbox"/> | <a href="#">1678</a> | 305.9428 | 1219.7421 | 1219.7401 | 1.71 | 1     | 34     | 0.063    | 1       | K_LVQRLEHAAK.Q + Dimethyl (K); Dimethyl (N-term)              |
| <input checked="" type="checkbox"/> | <a href="#">1861</a> | 630.3448 | 1258.6751 | 1258.6703 | 3.85 | 0     | (74)   | 6.4e-006 | 1       | R_MATNAAQNAIK.K + Dimethyl (K); Dimethyl (N-term)             |
| <input checked="" type="checkbox"/> | <a href="#">1884</a> | 634.3698 | 1266.7250 | 1266.7205 | 3.49 | 0     | 88     | 3e-007   | 1       | R_MATNAAQNAIK.K + Dimethyl:2H(4) (K); Dimethyl:2H(4) (N-term) |
| <input checked="" type="checkbox"/> | <a href="#">1888</a> | 634.9125 | 1267.8104 | 1267.8025 | 6.21 | 0     | 48     | 0.0018   | 1       | K_VMTNVTSLK.T + Dimethyl:2H(4) (K); Dimethyl:2H(4) (N-term)   |
| <input checked="" type="checkbox"/> | <a href="#">2312</a> | 474.2700 | 1419.7880 | 1419.7834 | 3.28 | 1     | (31)   | 0.17     | 1       | K_KSTVLQQQYNR.V + Dimethyl (K); Dimethyl (N-term)             |
| <input checked="" type="checkbox"/> | <a href="#">2346</a> | 476.9532 | 1427.8378 | 1427.8336 | 2.95 | 1     | 41     | 0.014    | 1       | K_KSTVLQQQYNR.V + Dimethyl:2H(4) (K); Dimethyl:2H(4) (N-term) |
| <input checked="" type="checkbox"/> | <a href="#">2512</a> | 738.4029 | 1474.7912 | 1474.7813 | 6.71 | 0     | 56     | 0.00054  | 1       | K_TMLESAGGLIQTAR.A + Dimethyl (N-term)                        |
| <input checked="" type="checkbox"/> | <a href="#">3518</a> | 630.0055 | 1886.9947 | 1886.9850 | 5.17 | 0     | 70     | 2.3e-005 | 1       | K_LLGEIAQGNENYAGIAAR.D + Dimethyl (N-term)                    |
| <input checked="" type="checkbox"/> | <a href="#">3526</a> | 631.3476 | 1891.0210 | 1891.0101 | 5.75 | 0     | (47)   | 0.0053   | 1       | K_LLGEIAQGNENYAGIAAR.D + Dimethyl:2H(4) (N-term)              |
| <input checked="" type="checkbox"/> | <a href="#">3652</a> | 664.3527 | 1990.0363 | 1990.0258 | 5.27 | 1     | 48     | 0.004    | 1       | K_AAAFEDQENETVVVKEK.M + 2 Dimethyl (K); Dimethyl (N-term)     |

|                                     |                      |          |           |           |      |   |      |          |   |                                                                         |
|-------------------------------------|----------------------|----------|-----------|-----------|------|---|------|----------|---|-------------------------------------------------------------------------|
| <input checked="" type="checkbox"/> | <a href="#">3692</a> | 668.3777 | 2002.1114 | 2002.1012 | 5.10 | 1 | (37) | 0.049    | 1 | K_AAFEDQENETVVVKEK.M + 2 Dimethyl:2H(4) (K); Dimethyl:2H(4) (N-term)    |
| <input checked="" type="checkbox"/> | <a href="#">3740</a> | 673.3845 | 2017.1317 | 2017.1208 | 5.44 | 1 | 44   | 0.0072   | 1 | R_QFVQSAKEVANSTANLVK.T + 2 Dimethyl (K); Dimethyl (N-term)              |
| <input checked="" type="checkbox"/> | <a href="#">3741</a> | 673.3845 | 2017.1317 | 2017.1208 | 5.44 | 1 | (39) | 0.023    | 1 | R_QFVQSAKEVANSTANLVK.T + 2 Dimethyl (K); Dimethyl (N-term)              |
| <input checked="" type="checkbox"/> | <a href="#">3756</a> | 674.3675 | 2020.0807 | 2020.0701 | 5.26 | 0 | (72) | 1.5e-005 | 1 | K_QAAASATQTIAAAQHAASAPK.A + Dimethyl (K); Dimethyl (N-term)             |
| <input checked="" type="checkbox"/> | <a href="#">3757</a> | 674.3676 | 2020.0808 | 2020.0701 | 5.31 | 0 | (79) | 3e-006   | 1 | K_QAAASATQTIAAAQHAASAPK.A + Dimethyl (K); Dimethyl (N-term)             |
| <input checked="" type="checkbox"/> | <a href="#">3774</a> | 677.0508 | 2028.1307 | 2028.1203 | 5.11 | 0 | 93   | 9.4e-008 | 1 | K_QAAASATQTIAAAQHAASAPK.A + Dimethyl:2H(4) (K); Dimethyl:2H(4) (N-term) |
| <input checked="" type="checkbox"/> | <a href="#">3775</a> | 677.0508 | 2028.1307 | 2028.1203 | 5.12 | 0 | (80) | 1.8e-006 | 1 | K_QAAASATQTIAAAQHAASAPK.A + Dimethyl:2H(4) (K); Dimethyl:2H(4) (N-term) |
| <input checked="" type="checkbox"/> | <a href="#">3779</a> | 677.4097 | 2029.2072 | 2029.1961 | 5.45 | 1 | (39) | 0.012    | 1 | R_QFVQSAKEVANSTANLVK.T + 2 Dimethyl:2H(4) (K); Dimethyl:2H(4) (N-term)  |
| <input checked="" type="checkbox"/> | <a href="#">3841</a> | 685.7032 | 2054.0877 | 2054.0756 | 5.91 | 0 | 88   | 3.5e-007 | 1 | R_LNEAAAGLNQAATELVQASR.G + Dimethyl (N-term)                            |
| <input checked="" type="checkbox"/> | <a href="#">3851</a> | 687.0455 | 2058.1147 | 2058.1007 | 6.82 | 0 | (44) | 0.0094   | 1 | R_LNEAAAGLNQAATELVQASR.G + Dimethyl:2H(4) (N-term)                      |
| <input checked="" type="checkbox"/> | <a href="#">3890</a> | 696.7075 | 2087.1007 | 2087.0899 | 5.20 | 0 | 36   | 0.056    | 1 | R_LLSDLLPSTGTGFQEAQSR.L + Dimethyl (N-term)                             |
| <input checked="" type="checkbox"/> | <a href="#">4028</a> | 735.7631 | 2204.2675 | 2204.2528 | 6.68 | 0 | (39) | 0.02     | 1 | K_LLAALEDEGGNGRPLLQAAK.G + Dimethyl (K); Dimethyl (N-term)              |
| <input checked="" type="checkbox"/> | <a href="#">4038</a> | 553.0236 | 2208.0651 | 2208.0593 | 2.65 | 1 | 30   | 0.14     | 1 | K_MVEAAKGAAHPDSEEQQR.L + Dimethyl (K); Dimethyl (N-term)                |
| <input checked="" type="checkbox"/> | <a href="#">4042</a> | 738.4465 | 2212.3177 | 2212.3030 | 6.64 | 0 | 46   | 0.0017   | 1 | K_LLAALEDEGGNGRPLLQAAK.G + Dimethyl:2H(4) (K); Dimethyl:2H(4) (N-term)  |
| <input checked="" type="checkbox"/> | <a href="#">4189</a> | 781.4225 | 2341.2457 | 2341.2328 | 5.52 | 0 | (31) | 0.18     | 1 | K_VGAIPANALDDGQWSQGLISAAR.M + Dimethyl:2H(4) (N-term)                   |
| <input checked="" type="checkbox"/> | <a href="#">4190</a> | 781.4227 | 2341.2462 | 2341.2328 | 5.71 | 0 | 41   | 0.021    | 1 | K_VGAIPANALDDGQWSQGLISAAR.M + Dimethyl:2H(4) (N-term)                   |

6. [IPI00136929](#) Mass: 44029 Score: 797 Queries matched: 50 emPAI: 3.65

Tax\_Id=10090 Gene\_Symbol=Actg1 Gamma actin-like protein

Check to include this hit in error tolerant search or archive report

| Query                | Observed | Mr(expt)  | Mr(calc)  | ppm  | Miss | Score | Expect | Rank | Peptide                                                                           |
|----------------------|----------|-----------|-----------|------|------|-------|--------|------|-----------------------------------------------------------------------------------|
| <a href="#">435</a>  | 350.7531 | 699.4916  | 699.4894  | 3.02 | 0    | (33)  | 0.032  | 1    | R_GILTLK.Y + Dimethyl (K); Dimethyl (N-term)                                      |
| <a href="#">442</a>  | 354.7782 | 707.5418  | 707.5397  | 3.07 | 0    | (33)  | 0.029  | 1    | R_GILTLK.Y + Dimethyl:2H(4) (K); Dimethyl:2H(4) (N-term)                          |
| <a href="#">443</a>  | 354.7784 | 707.5423  | 707.5397  | 3.76 | 0    | 42    | 0.0033 | 1    | R_GILTLK.Y + Dimethyl:2H(4) (K); Dimethyl:2H(4) (N-term)                          |
| <a href="#">642</a>  | 412.2567 | 822.4988  | 822.4963  | 3.05 | 0    | 36    | 0.031  | 1    | K_IIAPPER.K + Dimethyl (N-term)                                                   |
| <a href="#">1187</a> | 527.7816 | 1053.5486 | 1053.5416 | 6.59 | 0    | 46    | 0.003  | 1    | R_DLTDYLMK.I + Dimethyl (K); Dimethyl (N-term)                                    |
| <a href="#">1212</a> | 531.8063 | 1061.5981 | 1061.5918 | 5.91 | 0    | (43)  | 0.0091 | 1    | R_DLTDYLMK.I + Dimethyl:2H(4) (K); Dimethyl:2H(4) (N-term)                        |
| <a href="#">1437</a> | 580.7851 | 1159.5557 | 1159.5509 | 4.12 | 0    | 38    | 0.01   | 1    | R_GYSFTTTAER.E + Dimethyl (N-term)                                                |
| <a href="#">1438</a> | 580.7855 | 1159.5564 | 1159.5509 | 4.68 | 0    | (32)  | 0.036  | 1    | R_GYSFTTTAER.E + Dimethyl (N-term)                                                |
| <a href="#">1446</a> | 582.7978 | 1163.5810 | 1163.5761 | 4.26 | 0    | (31)  | 0.068  | 1    | R_GYSFTTTAER.E + Dimethyl:2H(4) (N-term)                                          |
| <a href="#">1447</a> | 582.7985 | 1163.5824 | 1163.5761 | 5.42 | 0    | (34)  | 0.036  | 1    | R_GYSFTTTAER.E + Dimethyl:2H(4) (N-term)                                          |
| <a href="#">1653</a> | 609.3474 | 1216.6802 | 1216.6737 | 5.32 | 0    | (42)  | 0.011  | 1    | K_EITALAPSTMK.I + Dimethyl (K); Dimethyl (N-term)                                 |
| <a href="#">1654</a> | 609.3474 | 1216.6802 | 1216.6737 | 5.32 | 0    | (40)  | 0.016  | 1    | K_EITALAPSTMK.I + Dimethyl (K); Dimethyl (N-term)                                 |
| <a href="#">1705</a> | 613.3725 | 1224.7304 | 1224.7239 | 5.34 | 0    | 44    | 0.0071 | 1    | K_EITALAPSTMK.I + Dimethyl:2H(4) (K); Dimethyl:2H(4) (N-term)                     |
| <a href="#">1706</a> | 613.3725 | 1224.7304 | 1224.7239 | 5.34 | 0    | (42)  | 0.0098 | 1    | K_EITALAPSTMK.I + Dimethyl:2H(4) (K); Dimethyl:2H(4) (N-term)                     |
| <a href="#">1777</a> | 617.3446 | 1232.6747 | 1232.6686 | 4.91 | 0    | (32)  | 0.13   | 1    | K_EITALAPSTMK.I + Dimethyl (K); Dimethyl (N-term); Oxidation (M)                  |
| <a href="#">1778</a> | 617.3448 | 1232.6751 | 1232.6686 | 5.31 | 0    | (33)  | 0.089  | 1    | K_EITALAPSTMK.I + Dimethyl (K); Dimethyl (N-term); Oxidation (M)                  |
| <a href="#">1817</a> | 621.3697 | 1240.7248 | 1240.7188 | 4.83 | 0    | (30)  | 0.2    | 1    | K_EITALAPSTMK.I + Dimethyl:2H(4) (K); Dimethyl:2H(4) (N-term); Oxidation (M)      |
| <a href="#">1818</a> | 621.3698 | 1240.7251 | 1240.7188 | 5.03 | 0    | (30)  | 0.21   | 1    | K_EITALAPSTMK.I + Dimethyl:2H(4) (K); Dimethyl:2H(4) (N-term); Oxidation (M)      |
| <a href="#">2305</a> | 473.5849 | 1417.7330 | 1417.7289 | 2.88 | 1    | (25)  | 0.52   | 1    | K_DSYVGDEAQSQR.G + Dimethyl:2H(4) (K); Dimethyl:2H(4) (N-term)                    |
| <a href="#">2306</a> | 473.5851 | 1417.7335 | 1417.7289 | 3.27 | 1    | 50    | 0.0019 | 1    | K_DSYVGDEAQSQR.G + Dimethyl:2H(4) (K); Dimethyl:2H(4) (N-term)                    |
| <a href="#">2624</a> | 505.6606 | 1513.9601 | 1513.9543 | 3.86 | 1    | 42    | 0.004  | 1    | K_EITALAPSTMKIK.I + 2 Dimethyl:2H(4) (K); Dimethyl:2H(4) (N-term); Oxidation (M)  |
| <a href="#">2873</a> | 544.9758 | 1631.9057 | 1631.8990 | 4.09 | 1    | (45)  | 0.007  | 1    | R_MQKEITALAPSTMK.I + 2 Dimethyl (K); Dimethyl (N-term)                            |
| <a href="#">2874</a> | 544.9761 | 1631.9066 | 1631.8990 | 4.65 | 1    | (44)  | 0.0083 | 1    | R_MQKEITALAPSTMK.I + 2 Dimethyl (K); Dimethyl (N-term)                            |
| <a href="#">2907</a> | 549.0010 | 1643.9811 | 1643.9743 | 4.12 | 1    | (41)  | 0.014  | 1    | R_MQKEITALAPSTMK.I + 2 Dimethyl:2H(4) (K); Dimethyl:2H(4) (N-term)                |
| <a href="#">2908</a> | 549.0011 | 1643.9815 | 1643.9743 | 4.34 | 1    | 51    | 0.0011 | 1    | R_MQKEITALAPSTMK.I + 2 Dimethyl:2H(4) (K); Dimethyl:2H(4) (N-term)                |
| <a href="#">2965</a> | 554.3323 | 1659.9752 | 1659.9693 | 3.57 | 1    | (29)  | 0.2    | 1    | R_MQKEITALAPSTMK.I + 2 Dimethyl:2H(4) (K); Dimethyl:2H(4) (N-term); Oxidation (M) |

|                      |          |           |           |        |   |      |          |   |                                                                                         |
|----------------------|----------|-----------|-----------|--------|---|------|----------|---|-----------------------------------------------------------------------------------------|
| <a href="#">3301</a> | 606.9832 | 1817.9277 | 1817.9159 | 6.49   | 0 | (46) | 0.0048   | 1 | K_SYELPDGGVITIGNER.F + Dimethyl (N-term)                                                |
| <a href="#">3302</a> | 909.9726 | 1817.9307 | 1817.9159 | 8.14   | 0 | (90) | 2e-007   | 1 | K_SYELPDGGVITIGNER.F + Dimethyl (N-term)                                                |
| <a href="#">3303</a> | 909.9731 | 1817.9317 | 1817.9159 | 8.69   | 0 | (79) | 2.5e-006 | 1 | K_SYELPDGGVITIGNER.F + Dimethyl (N-term)                                                |
| <a href="#">3323</a> | 608.3251 | 1821.9536 | 1821.9410 | 6.88   | 0 | (30) | 0.23     | 1 | K_SYELPDGGVITIGNER.F + Dimethyl:2H(4) (N-term)                                          |
| <a href="#">3324</a> | 911.9853 | 1821.9560 | 1821.9410 | 8.22   | 0 | 92   | 1.6e-007 | 1 | K_SYELPDGGVITIGNER.F + Dimethyl:2H(4) (N-term)                                          |
| <a href="#">3325</a> | 911.9858 | 1821.9570 | 1821.9410 | 8.76   | 0 | (87) | 5e-007   | 1 | K_SYELPDGGVITIGNER.F + Dimethyl:2H(4) (N-term)                                          |
| <a href="#">3440</a> | 934.4482 | 1866.8818 | 1866.9005 | -10.00 | 0 | 28   | 0.15     | 1 | M.EEEIAALVIDNGSGMCK.A + Dimethyl:2H(4) (K)                                              |
| <a href="#">3705</a> | 670.7178 | 2009.1315 | 2009.1197 | 5.87   | 0 | (40) | 0.018    | 1 | R_VAPEEHPVLLTEAPLNPK.R + Dimethyl (K); Dimethyl (N-term)                                |
| <a href="#">3706</a> | 670.7178 | 2009.1315 | 2009.1197 | 5.87   | 0 | (37) | 0.038    | 1 | R_VAPEEHPVLLTEAPLNPK.R + Dimethyl (K); Dimethyl (N-term)                                |
| <a href="#">3707</a> | 670.7179 | 2009.1317 | 2009.1197 | 5.99   | 0 | (41) | 0.017    | 1 | R_VAPEEHPVLLTEAPLNPK.R + Dimethyl (K); Dimethyl (N-term)                                |
| <a href="#">3708</a> | 670.7179 | 2009.1317 | 2009.1197 | 5.99   | 0 | (44) | 0.0084   | 1 | R_VAPEEHPVLLTEAPLNPK.R + Dimethyl (K); Dimethyl (N-term)                                |
| <a href="#">3709</a> | 670.7180 | 2009.1322 | 2009.1197 | 6.24   | 0 | (39) | 0.023    | 1 | R_VAPEEHPVLLTEAPLNPK.R + Dimethyl (K); Dimethyl (N-term)                                |
| <a href="#">3742</a> | 673.3995 | 2017.1767 | 2017.1699 | 3.37   | 0 | (31) | 0.095    | 1 | R_VAPEEHPVLLTEAPLNPK.R + Dimethyl:2H(4) (K); Dimethyl:2H(4) (N-term)                    |
| <a href="#">3746</a> | 673.4012 | 2017.1817 | 2017.1699 | 5.85   | 0 | (44) | 0.0051   | 1 | R_VAPEEHPVLLTEAPLNPK.R + Dimethyl:2H(4) (K); Dimethyl:2H(4) (N-term)                    |
| <a href="#">3747</a> | 673.4013 | 2017.1821 | 2017.1699 | 6.03   | 0 | (42) | 0.0083   | 1 | R_VAPEEHPVLLTEAPLNPK.R + Dimethyl:2H(4) (K); Dimethyl:2H(4) (N-term)                    |
| <a href="#">3748</a> | 673.4015 | 2017.1827 | 2017.1699 | 6.35   | 0 | 46   | 0.0029   | 1 | R_VAPEEHPVLLTEAPLNPK.R + Dimethyl:2H(4) (K); Dimethyl:2H(4) (N-term)                    |
| <a href="#">3749</a> | 673.4017 | 2017.1832 | 2017.1699 | 6.57   | 0 | (45) | 0.0039   | 1 | R_VAPEEHPVLLTEAPLNPK.R + Dimethyl:2H(4) (K); Dimethyl:2H(4) (N-term)                    |
| <a href="#">4239</a> | 800.4190 | 2398.2352 | 2398.2202 | 6.24   | 1 | (51) | 0.002    | 1 | R_KDLYANTVLSGGTTMYPGLADR.M + Dimethyl (K); Dimethyl (N-term)                            |
| <a href="#">4240</a> | 800.4199 | 2398.2377 | 2398.2202 | 7.29   | 1 | (71) | 1.7e-005 | 1 | R_KDLYANTVLSGGTTMYPGLADR.M + Dimethyl (K); Dimethyl (N-term)                            |
| <a href="#">4243</a> | 803.1025 | 2406.2856 | 2406.2705 | 6.29   | 1 | (55) | 0.00086  | 1 | R_KDLYANTVLSGGTTMYPGLADR.M + Dimethyl:2H(4) (K); Dimethyl:2H(4) (N-term)                |
| <a href="#">4244</a> | 803.1038 | 2406.2897 | 2406.2705 | 8.00   | 1 | (32) | 0.18     | 1 | R_KDLYANTVLSGGTTMYPGLADR.M + Dimethyl:2H(4) (K); Dimethyl:2H(4) (N-term)                |
| <a href="#">4245</a> | 803.1039 | 2406.2898 | 2406.2705 | 8.04   | 1 | (58) | 0.00042  | 1 | R_KDLYANTVLSGGTTMYPGLADR.M + Dimethyl:2H(4) (K); Dimethyl:2H(4) (N-term)                |
| <a href="#">4257</a> | 805.7502 | 2414.2289 | 2414.2151 | 5.70   | 1 | 77   | 4e-006   | 1 | R_KDLYANTVLSGGTTMYPGLADR.M + Dimethyl (K); Dimethyl (N-term); Oxidation (M)             |
| <a href="#">4260</a> | 808.4335 | 2422.2788 | 2422.2654 | 5.52   | 1 | (60) | 0.00022  | 1 | R_KDLYANTVLSGGTTMYPGLADR.M + Dimethyl:2H(4) (K); Dimethyl:2H(4) (N-term); Oxidation (M) |

7. [IPI00114375](#) Mass: 62638 Score: 658 Queries matched: 30 emPAI: 1.53

Tax\_Id=10090 Gene\_Symbol=Dpys12 Dihydropyrimidinase-related protein 2

Check to include this hit in error tolerant search or archive report

| Query                                                    | Observed | Mr(expt)  | Mr(calc)  | ppm  | Miss | Score | Expect   | Rank | Peptide                                                            |
|----------------------------------------------------------|----------|-----------|-----------|------|------|-------|----------|------|--------------------------------------------------------------------|
| <input checked="" type="checkbox"/> <a href="#">828</a>  | 468.7706 | 935.5267  | 935.5229  | 4.12 | 0    | 54    | 0.00056  | 1    | K_VFNLYPR.K + Dimethyl (N-term)                                    |
| <input checked="" type="checkbox"/> <a href="#">839</a>  | 470.7831 | 939.5516  | 939.5480  | 3.86 | 0    | (50)  | 0.0013   | 1    | K_VFNLYPR.K + Dimethyl:2H(4) (N-term)                              |
| <input checked="" type="checkbox"/> <a href="#">1132</a> | 522.2976 | 1042.5807 | 1042.5771 | 3.50 | 0    | 58    | 0.00029  | 1    | K_SAAEVIAQAR.K + Dimethyl (N-term)                                 |
| <input checked="" type="checkbox"/> <a href="#">1156</a> | 524.3103 | 1046.6061 | 1046.6022 | 3.69 | 0    | (52)  | 0.0013   | 1    | K_SAAEVIAQAR.K + Dimethyl:2H(4) (N-term)                           |
| <input checked="" type="checkbox"/> <a href="#">1328</a> | 372.2458 | 1113.7154 | 1113.7121 | 2.99 | 1    | 31    | 0.086    | 1    | R_ITSDRLLIK.G + Dimethyl (K); Dimethyl (N-term)                    |
| <input checked="" type="checkbox"/> <a href="#">1395</a> | 570.8561 | 1139.6977 | 1139.6914 | 5.54 | 0    | 48    | 0.002    | 1    | R_GSPLVVISQGK.I + Dimethyl (K); Dimethyl (N-term)                  |
| <input checked="" type="checkbox"/> <a href="#">2029</a> | 441.5809 | 1321.7207 | 1321.7177 | 2.32 | 0    | (40)  | 0.019    | 1    | R_MVIPGGIDVHTR.F + Dimethyl (N-term)                               |
| <input checked="" type="checkbox"/> <a href="#">2044</a> | 442.9225 | 1325.7456 | 1325.7428 | 2.15 | 0    | (49)  | 0.0021   | 1    | R_MVIPGGIDVHTR.F + Dimethyl:2H(4) (N-term)                         |
| <input checked="" type="checkbox"/> <a href="#">2092</a> | 446.9131 | 1337.7176 | 1337.7126 | 3.77 | 0    | 59    | 0.00024  | 1    | R_MVIPGGIDVHTR.F + Dimethyl (N-term); Oxidation (M)                |
| <input checked="" type="checkbox"/> <a href="#">2101</a> | 448.2549 | 1341.7429 | 1341.7377 | 3.89 | 0    | (56)  | 0.00047  | 1    | R_MVIPGGIDVHTR.F + Dimethyl:2H(4) (N-term); Oxidation (M)          |
| <input checked="" type="checkbox"/> <a href="#">2200</a> | 690.4215 | 1378.8285 | 1378.8184 | 7.30 | 0    | (59)  | 0.00019  | 1    | K_QIGENLIVPGGVK.T + Dimethyl (K); Dimethyl (N-term)                |
| <input checked="" type="checkbox"/> <a href="#">2223</a> | 694.4466 | 1386.8786 | 1386.8686 | 7.22 | 0    | 62    | 6.3e-005 | 1    | K_QIGENLIVPGGVK.T + Dimethyl:2H(4) (K); Dimethyl:2H(4) (N-term)    |
| <input checked="" type="checkbox"/> <a href="#">3080</a> | 570.9752 | 1709.9037 | 1709.8948 | 5.20 | 0    | 80    | 2.1e-006 | 1    | K_IVLEDGTLHVTEGSGR.Y + Dimethyl (N-term)                           |
| <input checked="" type="checkbox"/> <a href="#">3092</a> | 572.3168 | 1713.9287 | 1713.9199 | 5.10 | 0    | (76)  | 5.6e-006 | 1    | K_IVLEDGTLHVTEGSGR.Y + Dimethyl:2H(4) (N-term)                     |
| <input checked="" type="checkbox"/> <a href="#">3232</a> | 597.3156 | 1788.9250 | 1788.9168 | 4.61 | 0    | 42    | 0.013    | 1    | K_MDENQFVAVTSTNAAK.V + Dimethyl:2H(4) (K); Dimethyl:2H(4) (N-term) |
| <input checked="" type="checkbox"/> <a href="#">4010</a> | 733.0432 | 2196.1077 | 2196.0923 | 7.01 | 0    | 63    | 0.00011  | 1    | R_NLHQSGFSLGAQIDDNIPR.R + Dimethyl (N-term)                        |
| <input checked="" type="checkbox"/> <a href="#">4015</a> | 734.3834 | 2200.1283 | 2200.1174 | 4.91 | 0    | (30)  | 0.22     | 1    | R_NLHQSGFSLGAQIDDNIPR.R + Dimethyl:2H(4) (N-term)                  |
| <input checked="" type="checkbox"/> <a href="#">4016</a> | 734.3845 | 2200.1317 | 2200.1174 | 6.49 | 0    | (55)  | 0.00082  | 1    | R_NLHQSGFSLGAQIDDNIPR.R + Dimethyl:2H(4) (N-term)                  |

|                                     |                      |          |           |           |      |   |      |          |   |                                                                       |
|-------------------------------------|----------------------|----------|-----------|-----------|------|---|------|----------|---|-----------------------------------------------------------------------|
| <input checked="" type="checkbox"/> | <a href="#">4017</a> | 734.3845 | 2200.1317 | 2200.1174 | 6.49 | 0 | (48) | 0.0039   | 1 | R_NLHQSGFSLSGAQIDDNIPR.R + Dimethyl:2H(4) (N-term)                    |
| <input checked="" type="checkbox"/> | <a href="#">4018</a> | 734.3849 | 2200.1327 | 2200.1174 | 6.94 | 0 | (26) | 0.57     | 1 | R_NLHQSGFSLSGAQIDDNIPR.R + Dimethyl:2H(4) (N-term)                    |
| <input checked="" type="checkbox"/> | <a href="#">4019</a> | 734.3849 | 2200.1327 | 2200.1174 | 6.94 | 0 | (30) | 0.25     | 1 | R_NLHQSGFSLSGAQIDDNIPR.R + Dimethyl:2H(4) (N-term)                    |
| <input checked="" type="checkbox"/> | <a href="#">4024</a> | 735.3827 | 2203.1264 | 2203.1121 | 6.52 | 1 | (35) | 0.067    | 1 | K_AVGKDNFTLIEPTNGTEER.M + Dimethyl (K); Dimethyl (N-term)             |
| <input checked="" type="checkbox"/> | <a href="#">4029</a> | 552.3210 | 2205.2548 | 2205.2481 | 3.06 | 2 | 36   | 0.037    | 1 | K_TVTPASSAKTSPAQQAPPVR.N + 2 Dimethyl (K); Dimethyl (N-term)          |
| <input checked="" type="checkbox"/> | <a href="#">4030</a> | 736.3365 | 2205.9877 | 2205.9711 | 7.53 | 0 | (46) | 0.00089  | 1 | R_FQMPDQGMTSADDFQGTK.A + Dimethyl (K); Dimethyl (N-term)              |
| <input checked="" type="checkbox"/> | <a href="#">4031</a> | 736.3373 | 2205.9900 | 2205.9711 | 8.57 | 0 | (56) | 9.9e-005 | 1 | R_FQMPDQGMTSADDFQGTK.A + Dimethyl (K); Dimethyl (N-term)              |
| <input checked="" type="checkbox"/> | <a href="#">4041</a> | 738.0657 | 2211.1754 | 2211.1623 | 5.91 | 1 | 38   | 0.043    | 1 | K_AVGKDNFTLIEPTNGTEER.M + Dimethyl:2H(4) (K); Dimethyl:2H(4) (N-term) |
| <input checked="" type="checkbox"/> | <a href="#">4045</a> | 739.0210 | 2214.0412 | 2214.0213 | 8.95 | 0 | 57   | 0.00018  | 1 | R_FQMPDQGMTSADDFQGTK.A + Dimethyl:2H(4) (K); Dimethyl:2H(4) (N-term)  |
| <input checked="" type="checkbox"/> | <a href="#">4554</a> | 732.8967 | 2927.5577 | 2927.5352 | 7.69 | 0 | 61   | 0.00017  | 1 | R_ILDLGITGPEGHVLSRPEEVEAEAVNR.S + Dimethyl (N-term)                   |
| <input checked="" type="checkbox"/> | <a href="#">4560</a> | 733.9027 | 2931.5817 | 2931.5603 | 7.30 | 0 | (48) | 0.0026   | 1 | R_ILDLGITGPEGHVLSRPEEVEAEAVNR.S + Dimethyl:2H(4) (N-term)             |
| <input checked="" type="checkbox"/> | <a href="#">4561</a> | 733.9027 | 2931.5817 | 2931.5603 | 7.30 | 0 | (55) | 0.00065  | 1 | R_ILDLGITGPEGHVLSRPEEVEAEAVNR.S + Dimethyl:2H(4) (N-term)             |

8. [IPI00405058](#) Mass: 32497 Score: 637 Queries matched: 27 emPAI: 3.27  
Tax\_Id=10090 Gene\_Symbol=Hnrnpa2b1 Isoform 3 of Heterogeneous nuclear ribonucleoproteins A2/B1  
 Check to include this hit in error tolerant search or archive report

| Query                               | Observed             | Mr(expt) | Mr(calc)  | ppm       | Miss | Score | Expect | Rank     | Peptide |                                                                                  |
|-------------------------------------|----------------------|----------|-----------|-----------|------|-------|--------|----------|---------|----------------------------------------------------------------------------------|
| <input checked="" type="checkbox"/> | <a href="#">1128</a> | 521.2433 | 1040.4720 | 1040.4676 | 4.27 | 0     | 66     | 5.4e-006 | 1       | R_GGNFGFGDSR.G + Dimethyl (N-term)                                               |
| <input checked="" type="checkbox"/> | <a href="#">1144</a> | 523.2556 | 1044.4967 | 1044.4927 | 3.86 | 0     | (63)   | 1.8e-005 | 1       | R_GGNFGFGDSR.G + Dimethyl:2H(4) (N-term)                                         |
| <input checked="" type="checkbox"/> | <a href="#">2273</a> | 703.3381 | 1404.6617 | 1404.6535 | 5.86 | 0     | (75)   | 2.7e-006 | 1       | R_GGGGNFGPGPSNFR.G + Dimethyl (N-term)                                           |
| <input checked="" type="checkbox"/> | <a href="#">2285</a> | 705.3499 | 1408.6852 | 1408.6786 | 4.65 | 0     | 76     | 2.9e-006 | 1       | R_GGGGNFGPGPSNFR.G + Dimethyl:2H(4) (N-term)                                     |
| <input checked="" type="checkbox"/> | <a href="#">2383</a> | 360.4357 | 1437.7137 | 1437.7113 | 1.69 | 0     | (40)   | 0.012    | 1       | K_YHTINGHNAEVR.K + Dimethyl (N-term)                                             |
| <input checked="" type="checkbox"/> | <a href="#">2384</a> | 480.2455 | 1437.7145 | 1437.7113 | 2.26 | 0     | (34)   | 0.043    | 1       | K_YHTINGHNAEVR.K + Dimethyl (N-term)                                             |
| <input checked="" type="checkbox"/> | <a href="#">2401</a> | 481.5872 | 1441.7398 | 1441.7364 | 2.37 | 0     | 45     | 0.0047   | 1       | K_YHTINGHNAEVR.K + Dimethyl:2H(4) (N-term)                                       |
| <input checked="" type="checkbox"/> | <a href="#">2997</a> | 559.6195 | 1675.8367 | 1675.8311 | 3.34 | 1     | (37)   | 0.026    | 1       | K_ALSRQEMQEVQSSR.S + Dimethyl (N-term)                                           |
| <input checked="" type="checkbox"/> | <a href="#">3011</a> | 560.9612 | 1679.8617 | 1679.8562 | 3.25 | 1     | (38)   | 0.031    | 1       | K_ALSRQEMQEVQSSR.S + Dimethyl:2H(4) (N-term)                                     |
| <input checked="" type="checkbox"/> | <a href="#">3012</a> | 560.9614 | 1679.8624 | 1679.8562 | 3.69 | 1     | (41)   | 0.016    | 1       | K_ALSRQEMQEVQSSR.S + Dimethyl:2H(4) (N-term)                                     |
| <input checked="" type="checkbox"/> | <a href="#">3039</a> | 564.9512 | 1691.8317 | 1691.8260 | 3.35 | 1     | 46     | 0.0027   | 1       | K_ALSRQEMQEVQSSR.S + Dimethyl (N-term); Oxidation (M)                            |
| <input checked="" type="checkbox"/> | <a href="#">3056</a> | 566.2930 | 1695.8571 | 1695.8512 | 3.48 | 1     | (26)   | 0.43     | 1       | K_ALSRQEMQEVQSSR.S + Dimethyl:2H(4) (N-term); Oxidation (M)                      |
| <input checked="" type="checkbox"/> | <a href="#">3312</a> | 455.7663 | 1819.0362 | 1819.0316 | 2.55 | 1     | 26     | 0.56     | 1       | R_AVAREESGKPGAHVTVK.K + 2 Dimethyl (K); Dimethyl (N-term)                        |
| <input checked="" type="checkbox"/> | <a href="#">3352</a> | 611.6620 | 1831.9641 | 1831.9574 | 3.69 | 2     | (34)   | 0.095    | 1       | R_KALSRQEMQEVQSSR.S + Dimethyl (K); Dimethyl (N-term)                            |
| <input checked="" type="checkbox"/> | <a href="#">3371</a> | 614.3457 | 1840.0153 | 1840.0076 | 4.17 | 2     | (33)   | 0.13     | 1       | R_KALSRQEMQEVQSSR.S + Dimethyl:2H(4) (K); Dimethyl:2H(4) (N-term)                |
| <input checked="" type="checkbox"/> | <a href="#">3388</a> | 616.9935 | 1847.9586 | 1847.9523 | 3.39 | 2     | (35)   | 0.064    | 1       | R_KALSRQEMQEVQSSR.S + Dimethyl (K); Dimethyl (N-term); Oxidation (M)             |
| <input checked="" type="checkbox"/> | <a href="#">3423</a> | 619.6769 | 1856.0090 | 1856.0025 | 3.48 | 2     | 41     | 0.017    | 1       | R_KALSRQEMQEVQSSR.S + Dimethyl:2H(4) (K); Dimethyl:2H(4) (N-term); Oxidation (M) |
| <input checked="" type="checkbox"/> | <a href="#">3647</a> | 398.4496 | 1987.2114 | 1987.2080 | 1.70 | 2     | 30     | 0.079    | 1       | K_RAVAREESGKPGAHVTVK.K + 2 Dimethyl:2H(4) (K); Dimethyl:2H(4) (N-term)           |
| <input checked="" type="checkbox"/> | <a href="#">3648</a> | 398.4496 | 1987.2117 | 1987.2080 | 1.87 | 2     | (29)   | 0.077    | 1       | K_RAVAREESGKPGAHVTVK.K + 2 Dimethyl:2H(4) (K); Dimethyl:2H(4) (N-term)           |
| <input checked="" type="checkbox"/> | <a href="#">4071</a> | 741.3292 | 2220.9657 | 2220.9545 | 5.01 | 0     | (97)   | 4.3e-009 | 1       | R_NMGGPYGGGNYGPGSGSGGGYGR.S + Dimethyl:2H(4) (N-term)                            |
| <input checked="" type="checkbox"/> | <a href="#">4072</a> | 741.3292 | 2220.9657 | 2220.9545 | 5.04 | 0     | (78)   | 3.1e-007 | 1       | R_NMGGPYGGGNYGPGSGSGGGYGR.S + Dimethyl:2H(4) (N-term)                            |
| <input checked="" type="checkbox"/> | <a href="#">4089</a> | 745.3195 | 2232.9367 | 2232.9243 | 5.55 | 0     | 102    | 4.5e-010 | 1       | R_NMGGPYGGGNYGPGSGSGGGYGR.S + Dimethyl (N-term); Oxidation (M)                   |
| <input checked="" type="checkbox"/> | <a href="#">4095</a> | 746.6612 | 2236.9617 | 2236.9494 | 5.49 | 0     | (50)   | 0.00015  | 1       | R_NMGGPYGGGNYGPGSGSGGGYGR.S + Dimethyl:2H(4) (N-term); Oxidation (M)             |
| <input checked="" type="checkbox"/> | <a href="#">4218</a> | 591.0710 | 2360.2547 | 2360.2417 | 5.53 | 1     | (45)   | 0.0084   | 1       | R_GFGFVTFDDHDPVDKIVLQK.Y + 2 Dimethyl (K); Dimethyl (N-term)                     |
| <input checked="" type="checkbox"/> | <a href="#">4219</a> | 591.0710 | 2360.2548 | 2360.2417 | 5.58 | 1     | (46)   | 0.006    | 1       | R_GFGFVTFDDHDPVDKIVLQK.Y + 2 Dimethyl (K); Dimethyl (N-term)                     |
| <input checked="" type="checkbox"/> | <a href="#">4224</a> | 594.0905 | 2372.3327 | 2372.3170 | 6.62 | 1     | (42)   | 0.011    | 1       | R_GFGFVTFDDHDPVDKIVLQK.Y + 2 Dimethyl:2H(4) (K); Dimethyl:2H(4) (N-term)         |
| <input checked="" type="checkbox"/> | <a href="#">4225</a> | 594.0905 | 2372.3327 | 2372.3170 | 6.62 | 1     | 46     | 0.0042   | 1       | R_GFGFVTFDDHDPVDKIVLQK.Y + 2 Dimethyl:2H(4) (K); Dimethyl:2H(4) (N-term)         |

Proteins matching the same set of peptides:

[IPI00622847](#) Mass: 36014 Score: 637 Queries matched: 27  
 Tax\_Id=10090 Gene\_Symbol=Hnrnpa2b1 Isoform 2 of Heterogeneous nuclear ribonucleoproteins A2/B1  
[IPI00828488](#) Mass: 37437 Score: 637 Queries matched: 27  
 Tax\_Id=10090 Gene\_Symbol=Hnrnpa2b1 Isoform 1 of Heterogeneous nuclear ribonucleoproteins A2/B1  
[IPI00853914](#) Mass: 87852 Score: 637 Queries matched: 27  
 Tax\_Id=10090 Gene\_Symbol=LOC100045191 similar to heterogeneous nuclear ribonucleoprotein A2/B1

9. [IPI00128642](#) Mass: 26056 Score: 633 Queries matched: 27 emPAI: 9.63

Tax\_Id=10090 Gene\_Symbol=Cbr2 Lung carbonyl reductase

Check to include this hit in error tolerant search or archive report

| Query                                                    | Observed | Mr(expt)  | Mr(calc)  | ppm   | Miss | Score | Expect   | Rank | Peptide                                                                                            |
|----------------------------------------------------------|----------|-----------|-----------|-------|------|-------|----------|------|----------------------------------------------------------------------------------------------------|
| <input checked="" type="checkbox"/> <a href="#">659</a>  | 417.7471 | 833.4796  | 833.4759  | 4.39  | 0    | 44    | 0.006    | 1    | K_LNFSGLR.A + Dimethyl (N-term)                                                                    |
| <input checked="" type="checkbox"/> <a href="#">662</a>  | 419.7596 | 837.5046  | 837.5010  | 4.20  | 0    | (28)  | 0.19     | 1    | K_LNFSGLR.A + Dimethyl:2H(4) (N-term)                                                              |
| <input checked="" type="checkbox"/> <a href="#">699</a>  | 425.7436 | 849.4727  | 849.4708  | 2.22  | 0    | (26)  | 0.35     | 1    | R_SFSVNL.R.S + Dimethyl (N-term)                                                                   |
| <input checked="" type="checkbox"/> <a href="#">703</a>  | 427.7562 | 853.4978  | 853.4960  | 2.13  | 0    | 43    | 0.0064   | 1    | R_SFSVNL.R.S + Dimethyl:2H(4) (N-term)                                                             |
| <input checked="" type="checkbox"/> <a href="#">794</a>  | 454.7523 | 907.4900  | 907.4871  | 3.25  | 0    | 54    | 0.0005   | 1    | K_GAMTMLTK.A + Dimethyl (K); Dimethyl (N-term)                                                     |
| <input checked="" type="checkbox"/> <a href="#">1289</a> | 552.3210 | 1102.6274 | 1102.6234 | 3.67  | 0    | 38    | 0.033    | 1    | R_TNSDLVSLAK.E + Dimethyl (K); Dimethyl (N-term)                                                   |
| <input checked="" type="checkbox"/> <a href="#">1316</a> | 556.3461 | 1110.6777 | 1110.6736 | 3.69  | 0    | (35)  | 0.043    | 1    | R_TNSDLVSLAK.E + Dimethyl:2H(4) (K); Dimethyl:2H(4) (N-term)                                       |
| <input checked="" type="checkbox"/> <a href="#">1347</a> | 374.5561 | 1120.6464 | 1120.6427 | 3.38  | 1    | 44    | 0.0083   | 1    | -.M <del>KL</del> NFSGLR.A + Dimethyl (K); Dimethyl (N-term)                                       |
| <input checked="" type="checkbox"/> <a href="#">1366</a> | 377.2397 | 1128.6972 | 1128.6929 | 3.84  | 1    | (40)  | 0.015    | 1    | -.M <del>KL</del> NFSGLR.A + Dimethyl:2H(4) (K); Dimethyl:2H(4) (N-term)                           |
| <input checked="" type="checkbox"/> <a href="#">1380</a> | 379.8875 | 1136.6406 | 1136.6376 | 2.67  | 1    | (41)  | 0.013    | 1    | -.M <del>KL</del> NFSGLR.A + Dimethyl (K); Dimethyl (N-term); Oxidation (M)                        |
| <input checked="" type="checkbox"/> <a href="#">1393</a> | 380.8697 | 1139.5872 | 1139.5831 | 3.57  | 0    | (64)  | 4.7e-005 | 1    | K_AMAMELGPHK.I + Dimethyl (K); Dimethyl (N-term)                                                   |
| <input checked="" type="checkbox"/> <a href="#">1401</a> | 382.5710 | 1144.6912 | 1144.6878 | 2.98  | 1    | (33)  | 0.082    | 1    | -.M <del>KL</del> NFSGLR.A + Dimethyl:2H(4) (K); Dimethyl:2H(4) (N-term); Oxidation (M)            |
| <input checked="" type="checkbox"/> <a href="#">1409</a> | 383.5530 | 1147.6372 | 1147.6333 | 3.38  | 0    | (58)  | 0.00032  | 1    | K_AMAMELGPHK.I + Dimethyl:2H(4) (K); Dimethyl:2H(4) (N-term)                                       |
| <input checked="" type="checkbox"/> <a href="#">1450</a> | 388.8840 | 1163.6303 | 1163.6282 | 1.75  | 0    | 64    | 6.1e-005 | 1    | K_AMAMELGPHK.I + Dimethyl:2H(4) (K); Dimethyl:2H(4) (N-term); Oxidation (M)                        |
| <input checked="" type="checkbox"/> <a href="#">1918</a> | 640.3486 | 1278.6827 | 1278.6754 | 5.69  | 0    | (69)  | 2.2e-005 | 1    | R_SVFQVSQMVAR.D + Dimethyl (N-term)                                                                |
| <input checked="" type="checkbox"/> <a href="#">1926</a> | 642.3616 | 1282.7087 | 1282.7006 | 6.36  | 0    | 74    | 6.5e-006 | 1    | R_SVFQVSQMVAR.D + Dimethyl:2H(4) (N-term)                                                          |
| <input checked="" type="checkbox"/> <a href="#">1948</a> | 648.3456 | 1294.6767 | 1294.6704 | 4.91  | 0    | (40)  | 0.015    | 1    | R_SVFQVSQMVAR.D + Dimethyl (N-term); Oxidation (M)                                                 |
| <input checked="" type="checkbox"/> <a href="#">1958</a> | 650.3582 | 1298.7019 | 1298.6955 | 4.92  | 0    | (48)  | 0.0024   | 1    | R_SVFQVSQMVAR.D + Dimethyl:2H(4) (N-term); Oxidation (M)                                           |
| <input checked="" type="checkbox"/> <a href="#">2860</a> | 815.4538 | 1628.8930 | 1628.8808 | 7.54  | 0    | 98    | 3.6e-008 | 1    | R_VNSVNPTVVLTD <del>MGK</del> .K + Dimethyl (K); Dimethyl (N-term)                                 |
| <input checked="" type="checkbox"/> <a href="#">2894</a> | 819.4785 | 1636.9424 | 1636.9310 | 6.95  | 0    | (95)  | 6e-008   | 1    | R_VNSVNPTVVLTD <del>MGK</del> .K + Dimethyl:2H(4) (K); Dimethyl:2H(4) (N-term)                     |
| <input checked="" type="checkbox"/> <a href="#">2911</a> | 549.3015 | 1644.8827 | 1644.8757 | 4.28  | 0    | (40)  | 0.024    | 1    | R_VNSVNPTVVLTD <del>MGK</del> .K + Dimethyl (K); Dimethyl (N-term); Oxidation (M)                  |
| <input checked="" type="checkbox"/> <a href="#">2930</a> | 827.4266 | 1652.8387 | 1652.8257 | 7.86  | 0    | 78    | 2.6e-006 | 1    | R_SASTSGGGILVDAGYLAS.- + Dimethyl (N-term)                                                         |
| <input checked="" type="checkbox"/> <a href="#">2934</a> | 551.9850 | 1652.9331 | 1652.9259 | 4.37  | 0    | (28)  | 0.34     | 1    | R_VNSVNPTVVLTD <del>MGK</del> .K + Dimethyl:2H(4) (K); Dimethyl:2H(4) (N-term); Oxidation (M)      |
| <input checked="" type="checkbox"/> <a href="#">2952</a> | 829.4385 | 1656.8625 | 1656.8508 | 7.05  | 0    | (43)  | 0.01     | 1    | R_SASTSGGGILVDAGYLAS.- + Dimethyl:2H(4) (N-term)                                                   |
| <input checked="" type="checkbox"/> <a href="#">3542</a> | 633.6998 | 1898.0777 | 1898.0659 | 6.22  | 1    | 63    | 0.0001   | 1    | K_IRVNSVNPTVVLTD <del>MGK</del> .K + Dimethyl (K); Dimethyl (N-term)                               |
| <input checked="" type="checkbox"/> <a href="#">3553</a> | 636.3837 | 1906.1292 | 1906.1162 | 6.83  | 1    | (41)  | 0.0092   | 1    | K_IRVNSVNPTVVLTD <del>MGK</del> .K + Dimethyl:2H(4) (K); Dimethyl:2H(4) (N-term)                   |
| <input checked="" type="checkbox"/> <a href="#">4510</a> | 695.3760 | 2777.4748 | 2777.4935 | -6.74 | 2    | 42    | 0.015    | 1    | R_VNSVNPTVVLTD <del>MGK</del> VSADPEFAR.K + 2 Dimethyl (K); Dimethyl:2H(4) (N-term); Oxidation (M) |

10. [IPI00229080](#) Mass: 83571 Score: 579 Queries matched: 19 emPAI: 0.73

Tax\_Id=10090 Gene\_Symbol=Hsp90ab1 Heat shock protein 84b

Check to include this hit in error tolerant search or archive report

| Query                                                    | Observed | Mr(expt)  | Mr(calc)  | ppm  | Miss | Score | Expect   | Rank | Peptide                                                                        |
|----------------------------------------------------------|----------|-----------|-----------|------|------|-------|----------|------|--------------------------------------------------------------------------------|
| <input checked="" type="checkbox"/> <a href="#">713</a>  | 429.2858 | 856.5570  | 856.5534  | 4.14 | 0    | (39)  | 0.017    | 1    | R_ALLFIPR.R + Dimethyl (N-term)                                                |
| <input checked="" type="checkbox"/> <a href="#">729</a>  | 431.2984 | 860.5822  | 860.5786  | 4.22 | 0    | 42    | 0.009    | 1    | R_ALLFIPR.R + Dimethyl:2H(4) (N-term)                                          |
| <input checked="" type="checkbox"/> <a href="#">1690</a> | 611.8466 | 1221.6787 | 1221.6717 | 5.74 | 0    | 32    | 0.14     | 1    | K_IDIIPNPQER.T + Dimethyl (N-term)                                             |
| <input checked="" type="checkbox"/> <a href="#">1956</a> | 649.8915 | 1297.7685 | 1297.7605 | 6.17 | 0    | (60)  | 0.00019  | 1    | K_ADLINNLGTIAK.S + Dimethyl (K); Dimethyl (N-term)                             |
| <input checked="" type="checkbox"/> <a href="#">1988</a> | 653.9164 | 1305.8183 | 1305.8107 | 5.81 | 0    | 69    | 1.4e-005 | 1    | K_ADLINNLGTIAK.S + Dimethyl:2H(4) (K); Dimethyl:2H(4) (N-term)                 |
| <input checked="" type="checkbox"/> <a href="#">2061</a> | 666.3602 | 1330.7058 | 1330.6980 | 5.87 | 0    | 60    | 0.00016  | 1    | R_ELISNASDALDK.I + Dimethyl (K); Dimethyl (N-term)                             |
| <input checked="" type="checkbox"/> <a href="#">2276</a> | 703.4070 | 1404.7995 | 1404.7898 | 6.92 | 0    | (62)  | 0.00014  | 1    | R_TLTLVDTGIGMTK.A + Dimethyl (K); Dimethyl (N-term)                            |
| <input checked="" type="checkbox"/> <a href="#">2295</a> | 707.4320 | 1412.8495 | 1412.8400 | 6.67 | 0    | (46)  | 0.0039   | 1    | R_TLTLVDTGIGMTK.A + Dimethyl:2H(4) (K); Dimethyl:2H(4) (N-term)                |
| <input checked="" type="checkbox"/> <a href="#">2318</a> | 474.6043 | 1420.7910 | 1420.7847 | 4.42 | 0    | (44)  | 0.0086   | 1    | R_TLTLVDTGIGMTK.A + Dimethyl (K); Dimethyl (N-term); Oxidation (M)             |
| <input checked="" type="checkbox"/> <a href="#">2319</a> | 711.4047 | 1420.7949 | 1420.7847 | 7.15 | 0    | 68    | 3.6e-005 | 1    | R_TLTLVDTGIGMTK.A + Dimethyl (K); Dimethyl (N-term); Oxidation (M)             |
| <input checked="" type="checkbox"/> <a href="#">2353</a> | 477.2876 | 1428.8411 | 1428.8350 | 4.26 | 0    | (44)  | 0.0079   | 1    | R_TLTLVDTGIGMTK.A + Dimethyl:2H(4) (K); Dimethyl:2H(4) (N-term); Oxidation (M) |
| <input checked="" type="checkbox"/> <a href="#">2355</a> | 715.4290 | 1428.8434 | 1428.8350 | 5.87 | 0    | (52)  | 0.0012   | 1    | R_TLTLVDTGIGMTK.A + Dimethyl:2H(4) (K); Dimethyl:2H(4) (N-term); Oxidation (M) |
| <input checked="" type="checkbox"/> <a href="#">2692</a> | 771.4176 | 1540.8207 | 1540.8097 | 7.17 | 0    | (104) | 8.9e-009 | 1    | R_GVVVSEDLPLNISR.E + Dimethyl (N-term)                                         |
| <input checked="" type="checkbox"/> <a href="#">2699</a> | 773.4298 | 1544.8451 | 1544.8348 | 6.65 | 0    | 113   | 1.1e-009 | 1    | R_GVVVSEDLPLNISR.E + Dimethyl:2H(4) (N-term)                                   |
| <input checked="" type="checkbox"/> <a href="#">2812</a> | 536.9876 | 1607.9410 | 1607.9334 | 4.75 | 1    | 43    | 0.0087   | 1    | R_ELISNASDALDKIR.Y + Dimethyl:2H(4) (K); Dimethyl:2H(4) (N-term)               |
| <input checked="" type="checkbox"/> <a href="#">3279</a> | 604.3350 | 1809.9831 | 1809.9737 | 5.16 | 0    | 80    | 2.6e-006 | 1    | K_HLEINPDHPIVETLR.Q + Dimethyl (N-term)                                        |
| <input checked="" type="checkbox"/> <a href="#">3280</a> | 604.3350 | 1809.9832 | 1809.9737 | 5.26 | 0    | (55)  | 0.00082  | 1    | K_HLEINPDHPIVETLR.Q + Dimethyl (N-term)                                        |
| <input checked="" type="checkbox"/> <a href="#">3293</a> | 605.6768 | 1814.0087 | 1813.9988 | 5.46 | 0    | (39)  | 0.031    | 1    | K_HLEINPDHPIVETLR.Q + Dimethyl:2H(4) (N-term)                                  |
| <input checked="" type="checkbox"/> <a href="#">4026</a> | 735.6685 | 2203.9837 | 2203.9692 | 6.61 | 0    | 58    | 5.2e-005 | 1    | R_YHTSQSGDEMTSLSEYVSR.M + Dimethyl (N-term)                                    |

11. [IPI00554929](#) Mass: 83615 Score: 565 Queries matched: 17 emPAI: 0.63

Tax\_Id=10090 Gene\_Symbol=Hsp90ab1 Heat shock protein HSP 90-beta

Check to include this hit in error tolerant search or archive report

| Query                | Observed | Mr(expt)  | Mr(calc)  | ppm  | Miss | Score | Expect   | Rank | Peptide                                                                        |
|----------------------|----------|-----------|-----------|------|------|-------|----------|------|--------------------------------------------------------------------------------|
| <a href="#">1690</a> | 611.8466 | 1221.6787 | 1221.6717 | 5.74 | 0    | 32    | 0.14     | 1    | K_IDIIPNPQER.T + Dimethyl (N-term)                                             |
| <a href="#">1956</a> | 649.8915 | 1297.7685 | 1297.7605 | 6.17 | 0    | (60)  | 0.00019  | 1    | K_ADLINNLGTIAK.S + Dimethyl (K); Dimethyl (N-term)                             |
| <a href="#">1988</a> | 653.9164 | 1305.8183 | 1305.8107 | 5.81 | 0    | 69    | 1.4e-005 | 1    | K_ADLINNLGTIAK.S + Dimethyl:2H(4) (K); Dimethyl:2H(4) (N-term)                 |
| <a href="#">2061</a> | 666.3602 | 1330.7058 | 1330.6980 | 5.87 | 0    | 60    | 0.00016  | 1    | R_ELISNASDALDK.I + Dimethyl (K); Dimethyl (N-term)                             |
| <a href="#">2276</a> | 703.4070 | 1404.7995 | 1404.7898 | 6.92 | 0    | (62)  | 0.00014  | 1    | R_TLTLVDTGIGMTK.A + Dimethyl (K); Dimethyl (N-term)                            |
| <a href="#">2295</a> | 707.4320 | 1412.8495 | 1412.8400 | 6.67 | 0    | (46)  | 0.0039   | 1    | R_TLTLVDTGIGMTK.A + Dimethyl:2H(4) (K); Dimethyl:2H(4) (N-term)                |
| <a href="#">2318</a> | 474.6043 | 1420.7910 | 1420.7847 | 4.42 | 0    | (44)  | 0.0086   | 1    | R_TLTLVDTGIGMTK.A + Dimethyl (K); Dimethyl (N-term); Oxidation (M)             |
| <a href="#">2319</a> | 711.4047 | 1420.7949 | 1420.7847 | 7.15 | 0    | 68    | 3.6e-005 | 1    | R_TLTLVDTGIGMTK.A + Dimethyl (K); Dimethyl (N-term); Oxidation (M)             |
| <a href="#">2353</a> | 477.2876 | 1428.8411 | 1428.8350 | 4.26 | 0    | (44)  | 0.0079   | 1    | R_TLTLVDTGIGMTK.A + Dimethyl:2H(4) (K); Dimethyl:2H(4) (N-term); Oxidation (M) |
| <a href="#">2355</a> | 715.4290 | 1428.8434 | 1428.8350 | 5.87 | 0    | (52)  | 0.0012   | 1    | R_TLTLVDTGIGMTK.A + Dimethyl:2H(4) (K); Dimethyl:2H(4) (N-term); Oxidation (M) |
| <a href="#">2692</a> | 771.4176 | 1540.8207 | 1540.8097 | 7.17 | 0    | (104) | 8.9e-009 | 1    | R_GVVVSEDLPLNISR.E + Dimethyl (N-term)                                         |
| <a href="#">2699</a> | 773.4298 | 1544.8451 | 1544.8348 | 6.65 | 0    | 113   | 1.1e-009 | 1    | R_GVVVSEDLPLNISR.E + Dimethyl:2H(4) (N-term)                                   |
| <a href="#">2812</a> | 536.9876 | 1607.9410 | 1607.9334 | 4.75 | 1    | 43    | 0.0087   | 1    | R_ELISNASDALDKIR.Y + Dimethyl:2H(4) (K); Dimethyl:2H(4) (N-term)               |
| <a href="#">3279</a> | 604.3350 | 1809.9831 | 1809.9737 | 5.16 | 0    | 80    | 2.6e-006 | 1    | K_HLEINPDHPIVETLR.Q + Dimethyl (N-term)                                        |
| <a href="#">3280</a> | 604.3350 | 1809.9832 | 1809.9737 | 5.26 | 0    | (55)  | 0.00082  | 1    | K_HLEINPDHPIVETLR.Q + Dimethyl (N-term)                                        |
| <a href="#">3293</a> | 605.6768 | 1814.0087 | 1813.9988 | 5.46 | 0    | (39)  | 0.031    | 1    | K_HLEINPDHPIVETLR.Q + Dimethyl:2H(4) (N-term)                                  |
| <a href="#">4026</a> | 735.6685 | 2203.9837 | 2203.9692 | 6.61 | 0    | 58    | 5.2e-005 | 1    | R_YHTSQSGDEMTSLSEYVSR.M + Dimethyl (N-term)                                    |

12. [IPI00132722](#) Mass: 36520 Score: 512 Queries matched: 17 emPAI: 1.79

Tax\_Id=10090 Gene\_Symbol=Anxa3 Annexin A3

Check to include this hit in error tolerant search or archive report

| Query                                                    | Observed | Mr(expt)  | Mr(calc)  | ppm  | Miss | Score | Expect   | Rank | Peptide                                                                              |
|----------------------------------------------------------|----------|-----------|-----------|------|------|-------|----------|------|--------------------------------------------------------------------------------------|
| <input checked="" type="checkbox"/> <a href="#">885</a>  | 479.2921 | 956.5697  | 956.5655  | 4.46 | 0    | 65    | 5.6e-005 | 1    | K_ALLTLADGR.R + Dimethyl (N-term)                                                    |
| <input checked="" type="checkbox"/> <a href="#">890</a>  | 481.3043 | 960.5941  | 960.5906  | 3.66 | 0    | (59)  | 0.00023  | 1    | K_ALLTLADGR.R + Dimethyl:2H(4) (N-term)                                              |
| <input checked="" type="checkbox"/> <a href="#">921</a>  | 488.2602 | 974.5059  | 974.5011  | 4.92 | 0    | 30    | 0.11     | 1    | K_LTFDEYR.N + Dimethyl:2H(4) (N-term)                                                |
| <input checked="" type="checkbox"/> <a href="#">1279</a> | 550.8402 | 1099.6659 | 1099.6601 | 5.26 | 0    | (53)  | 0.0011   | 1    | K_TLINILTER.S + Dimethyl (N-term)                                                    |
| <input checked="" type="checkbox"/> <a href="#">1292</a> | 552.8527 | 1103.6908 | 1103.6852 | 5.05 | 0    | 60    | 0.00015  | 1    | K_TLINILTER.S + Dimethyl:2H(4) (N-term)                                              |
| <input checked="" type="checkbox"/> <a href="#">1299</a> | 553.3267 | 1104.6388 | 1104.6328 | 5.37 | 0    | 66    | 5.7e-005 | 1    | R_SEIDLDIR.H + Dimethyl:2H(4) (N-term)                                               |
| <input checked="" type="checkbox"/> <a href="#">2759</a> | 526.2942 | 1575.8607 | 1575.8548 | 3.77 | 1    | 41    | 0.018    | 1    | K_EISQAYTVYKK.S + 2 Dimethyl (K); Dimethyl (N-term)                                  |
| <input checked="" type="checkbox"/> <a href="#">2784</a> | 530.3195 | 1587.9367 | 1587.9301 | 4.14 | 1    | (40)  | 0.016    | 1    | K_EISQAYTVYKK.S + 2 Dimethyl:2H(4) (K); Dimethyl:2H(4) (N-term)                      |
| <input checked="" type="checkbox"/> <a href="#">2816</a> | 807.3731 | 1612.7317 | 1612.7217 | 6.24 | 0    | (70)  | 3.9e-006 | 1    | K_SLGDDISSETSGDFR.K + Dimethyl (N-term)                                              |
| <input checked="" type="checkbox"/> <a href="#">2824</a> | 809.3854 | 1616.7563 | 1616.7468 | 5.90 | 0    | 82    | 4.1e-007 | 1    | K_SLGDDISSETSGDFR.K + Dimethyl:2H(4) (N-term)                                        |
| <input checked="" type="checkbox"/> <a href="#">3884</a> | 693.7008 | 2078.0807 | 2078.0684 | 5.93 | 1    | (62)  | 0.00015  | 1    | R_GTIKDYPGFSPVDAEAIR.K + Dimethyl (K); Dimethyl (N-term)                             |
| <input checked="" type="checkbox"/> <a href="#">3885</a> | 693.7009 | 2078.0808 | 2078.0684 | 5.95 | 1    | 64    | 9.9e-005 | 1    | R_GTIKDYPGFSPVDAEAIR.K + Dimethyl (K); Dimethyl (N-term)                             |
| <input checked="" type="checkbox"/> <a href="#">3889</a> | 696.3832 | 2086.1277 | 2086.1186 | 4.35 | 1    | (48)  | 0.0044   | 1    | R_GTIKDYPGFSPVDAEAIR.K + Dimethyl:2H(4) (K); Dimethyl:2H(4) (N-term)                 |
| <input checked="" type="checkbox"/> <a href="#">3932</a> | 711.0565 | 2130.1477 | 2130.1330 | 6.93 | 1    | 49    | 0.0028   | 1    | K_SMKGTGTDEDALIEILTTR.S + Dimethyl:2H(4) (K); Dimethyl:2H(4) (N-term); Oxidation (M) |
| <input checked="" type="checkbox"/> <a href="#">4091</a> | 559.5584 | 2234.2045 | 2234.1947 | 4.42 | 2    | 73    | 1.2e-005 | 1    | R_GTIKDYPGFSPVDAEAIRK.A + 2 Dimethyl (K); Dimethyl (N-term)                          |
| <input checked="" type="checkbox"/> <a href="#">4092</a> | 559.5585 | 2234.2047 | 2234.1947 | 4.50 | 2    | (63)  | 0.00012  | 1    | R_GTIKDYPGFSPVDAEAIRK.A + 2 Dimethyl (K); Dimethyl (N-term)                          |
| <input checked="" type="checkbox"/> <a href="#">4107</a> | 562.5775 | 2246.2807 | 2246.2700 | 4.77 | 2    | (60)  | 0.00015  | 1    | R_GTIKDYPGFSPVDAEAIRK.A + 2 Dimethyl:2H(4) (K); Dimethyl:2H(4) (N-term)              |

13. [IPI00323357](#) Mass: 71055 Score: 502 Queries matched: 23 emPAI: 0.83

Tax\_Id=10090 Gene\_Symbol=Hspa8 Heat shock cognate 71 kDa protein

Check to include this hit in error tolerant search or archive report

| Query                                                    | Observed | Mr(expt)  | Mr(calc)  | ppm  | Miss | Score | Expect   | Rank | Peptide                                                               |
|----------------------------------------------------------|----------|-----------|-----------|------|------|-------|----------|------|-----------------------------------------------------------------------|
| <input checked="" type="checkbox"/> <a href="#">1146</a> | 349.2020 | 1044.5843 | 1044.5815 | 2.65 | 1    | 26    | 0.46     | 1    | R_LSKEDIER.M + Dimethyl (K); Dimethyl (N-term)                        |
| <input checked="" type="checkbox"/> <a href="#">1726</a> | 614.3606 | 1226.7067 | 1226.6983 | 6.89 | 0    | 61    | 0.00015  | 1    | K_DAGTIAGLNVLRI.I + Dimethyl (N-term)                                 |
| <input checked="" type="checkbox"/> <a href="#">1766</a> | 616.3731 | 1230.7317 | 1230.7234 | 6.77 | 0    | (47)  | 0.0036   | 1    | K_DAGTIAGLNVLRI.I + Dimethyl:2H(4) (N-term)                           |
| <input checked="" type="checkbox"/> <a href="#">2085</a> | 446.2580 | 1335.7523 | 1335.7471 | 3.82 | 1    | 40    | 0.018    | 1    | K_MKEIAEAYLGK.T + 2 Dimethyl (K); Dimethyl (N-term)                   |
| <input checked="" type="checkbox"/> <a href="#">2122</a> | 450.2832 | 1347.8278 | 1347.8225 | 3.92 | 1    | (30)  | 0.1      | 1    | K_MKEIAEAYLGK.T + 2 Dimethyl:2H(4) (K); Dimethyl:2H(4) (N-term)       |
| <input checked="" type="checkbox"/> <a href="#">2625</a> | 758.3746 | 1514.7347 | 1514.7253 | 6.22 | 0    | 70    | 7.8e-006 | 1    | R_TTPSYVAFDTER.L + Dimethyl (N-term)                                  |
| <input checked="" type="checkbox"/> <a href="#">2639</a> | 760.3879 | 1518.7612 | 1518.7504 | 7.10 | 0    | (39)  | 0.018    | 1    | R_TTPSYVAFDTER.L + Dimethyl:2H(4) (N-term)                            |
| <input checked="" type="checkbox"/> <a href="#">3014</a> | 840.9620 | 1679.9094 | 1679.8932 | 9.66 | 0    | 68    | 4.3e-005 | 1    | K_SFYPEEVSSMVLTK.M + Dimethyl:2H(4) (K); Dimethyl:2H(4) (N-term)      |
| <input checked="" type="checkbox"/> <a href="#">3018</a> | 561.9995 | 1682.9767 | 1682.9679 | 5.23 | 1    | 67    | 3.3e-005 | 1    | R_QATKDAGTIAGLNVLRI.I + Dimethyl (K); Dimethyl (N-term)               |
| <input checked="" type="checkbox"/> <a href="#">3037</a> | 564.6832 | 1691.0277 | 1691.0181 | 5.67 | 1    | (49)  | 0.0013   | 1    | R_QATKDAGTIAGLNVLRI.I + Dimethyl:2H(4) (K); Dimethyl:2H(4) (N-term)   |
| <input checked="" type="checkbox"/> <a href="#">3101</a> | 573.9262 | 1718.7567 | 1718.7496 | 4.13 | 0    | 45    | 0.0006   | 1    | K_STAGDTHLGGEDFDNR.M + Dimethyl (N-term)                              |
| <input checked="" type="checkbox"/> <a href="#">3107</a> | 575.2679 | 1722.7818 | 1722.7747 | 4.11 | 0    | (32)  | 0.023    | 1    | K_STAGDTHLGGEDFDNR.M + Dimethyl:2H(4) (N-term)                        |
| <input checked="" type="checkbox"/> <a href="#">3444</a> | 624.7032 | 1871.0877 | 1871.0767 | 5.87 | 1    | (61)  | 0.00012  | 1    | R_IINEPTAAAIAYGLDKK.V + 2 Dimethyl (K); Dimethyl (N-term)             |
| <input checked="" type="checkbox"/> <a href="#">3445</a> | 624.7038 | 1871.0897 | 1871.0767 | 6.94 | 1    | (57)  | 0.00032  | 1    | R_IINEPTAAAIAYGLDKK.V + 2 Dimethyl (K); Dimethyl (N-term)             |
| <input checked="" type="checkbox"/> <a href="#">3461</a> | 626.6592 | 1876.9559 | 1876.9465 | 4.99 | 1    | (33)  | 0.093    | 1    | K_NQVAMNPTNTVFDKR.L + Dimethyl (K); Dimethyl (N-term); Oxidation (M)  |
| <input checked="" type="checkbox"/> <a href="#">3462</a> | 626.6593 | 1876.9561 | 1876.9465 | 5.09 | 1    | 36    | 0.053    | 1    | K_NQVAMNPTNTVFDKR.L + Dimethyl (K); Dimethyl (N-term); Oxidation (M)  |
| <input checked="" type="checkbox"/> <a href="#">3500</a> | 628.7285 | 1883.1635 | 1883.1521 | 6.08 | 1    | 78    | 9.1e-007 | 1    | R_IINEPTAAAIAYGLDKK.V + 2 Dimethyl:2H(4) (K); Dimethyl:2H(4) (N-term) |
| <input checked="" type="checkbox"/> <a href="#">3501</a> | 628.7285 | 1883.1637 | 1883.1521 | 6.18 | 1    | (77)  | 1.3e-006 | 1    | R_IINEPTAAAIAYGLDKK.V + 2 Dimethyl:2H(4) (K); Dimethyl:2H(4) (N-term) |



|                                     |                      |          |           |           |      |   |      |       |   |                                                                                                |
|-------------------------------------|----------------------|----------|-----------|-----------|------|---|------|-------|---|------------------------------------------------------------------------------------------------|
| <input checked="" type="checkbox"/> | <a href="#">3509</a> | 629.3427 | 1885.0063 | 1884.9968 | 5.07 | 1 | (34) | 0.11  | 1 | K_NQVAMNPTNTVFD <del>AKR</del> .L + Dimethyl:2H(4) (K); Dimethyl:2H(4) (N-term); Oxidation (M) |
| <input checked="" type="checkbox"/> | <a href="#">3510</a> | 629.3430 | 1885.0072 | 1884.9968 | 5.56 | 1 | (31) | 0.21  | 1 | K_NQVAMNPTNTVFD <del>AKR</del> .L + Dimethyl:2H(4) (K); Dimethyl:2H(4) (N-term); Oxidation (M) |
| <input checked="" type="checkbox"/> | <a href="#">3700</a> | 670.6862 | 2009.0367 | 2009.0218 | 7.42 | 0 | 40   | 0.021 | 1 | K_TVTVNAVVTVPAYFNDSQR.Q + Dimethyl (N-term)                                                    |
| <input checked="" type="checkbox"/> | <a href="#">3725</a> | 672.0277 | 2013.0613 | 2013.0469 | 7.14 | 0 | (29) | 0.3   | 1 | K_TVTVNAVVTVPAYFNDSQR.Q + Dimethyl:2H(4) (N-term)                                              |
| <input checked="" type="checkbox"/> | <a href="#">3726</a> | 672.0278 | 2013.0617 | 2013.0469 | 7.35 | 0 | (32) | 0.13  | 1 | K_TVTVNAVVTVPAYFNDSQR.Q + Dimethyl:2H(4) (N-term)                                              |

14. [IPI00135284](#) Mass: 36092 Score: 475 Queries matched: 14 emPAI: 1.29

Tax\_Id=10090 Gene\_Symbol=LOC100044454;LOC100039214 similar to Glyceraldehyde-3-phosphate dehydrogenase (GAPDH) isoform 1

Check to include this hit in error tolerant search or archive report

| Query                               | Observed             | Mr(expt) | Mr(calc)  | ppm       | Miss | Score | Expect | Rank     | Peptide |                                                                                 |
|-------------------------------------|----------------------|----------|-----------|-----------|------|-------|--------|----------|---------|---------------------------------------------------------------------------------|
| <input checked="" type="checkbox"/> | <a href="#">1999</a> | 436.9481 | 1307.8225 | 1307.8176 | 3.74 | 1     | 48     | 0.0017   | 1       | K_AVGKVIPELNGK.L + 2 Dimethyl (K); Dimethyl (N-term)                            |
| <input checked="" type="checkbox"/> | <a href="#">2026</a> | 440.9732 | 1319.8979 | 1319.8930 | 3.70 | 1     | (47)   | 0.00059  | 1       | K_AVGKVIPELNGK.L + 2 Dimethyl:2H(4) (K); Dimethyl:2H(4) (N-term)                |
| <input checked="" type="checkbox"/> | <a href="#">2291</a> | 706.8668 | 1411.7190 | 1411.7091 | 7.00 | 1     | (77)   | 2.5e-006 | 1       | R_VVDLMAYMASKE.- + Dimethyl (K); Dimethyl (N-term)                              |
| <input checked="" type="checkbox"/> | <a href="#">2311</a> | 710.8921 | 1419.7696 | 1419.7593 | 7.27 | 1     | (79)   | 2.9e-006 | 1       | R_VVDLMAYMASKE.- + Dimethyl:2H(4) (K); Dimethyl:2H(4) (N-term)                  |
| <input checked="" type="checkbox"/> | <a href="#">2335</a> | 713.4106 | 1424.8066 | 1424.7987 | 5.56 | 0     | (56)   | 0.00059  | 1       | R_GAAQNIIPASTGAAK.A + Dimethyl (K); Dimethyl (N-term)                           |
| <input checked="" type="checkbox"/> | <a href="#">2344</a> | 714.8636 | 1427.7126 | 1427.7040 | 6.04 | 1     | (51)   | 0.00084  | 1       | R_VVDLMAYMASKE.- + Dimethyl (K); Dimethyl (N-term); Oxidation (M)               |
| <input checked="" type="checkbox"/> | <a href="#">2345</a> | 714.8646 | 1427.7147 | 1427.7040 | 7.49 | 1     | 80     | 1.3e-006 | 1       | R_VVDLMAYMASKE.- + Dimethyl (K); Dimethyl (N-term); Oxidation (M)               |
| <input checked="" type="checkbox"/> | <a href="#">2368</a> | 717.4359 | 1432.8573 | 1432.8489 | 5.83 | 0     | 62     | 0.00011  | 1       | R_GAAQNIIPASTGAAK.A + Dimethyl:2H(4) (K); Dimethyl:2H(4) (N-term)               |
| <input checked="" type="checkbox"/> | <a href="#">2374</a> | 718.8894 | 1435.7643 | 1435.7542 | 6.98 | 1     | (56)   | 0.0005   | 1       | R_VVDLMAYMASKE.- + Dimethyl:2H(4) (K); Dimethyl:2H(4) (N-term); Oxidation (M)   |
| <input checked="" type="checkbox"/> | <a href="#">2375</a> | 718.8900 | 1435.7654 | 1435.7542 | 7.75 | 1     | (59)   | 0.00028  | 1       | R_VVDLMAYMASKE.- + Dimethyl:2H(4) (K); Dimethyl:2H(4) (N-term); Oxidation (M)   |
| <input checked="" type="checkbox"/> | <a href="#">2406</a> | 722.8607 | 1443.7069 | 1443.6989 | 5.52 | 1     | (74)   | 4.3e-006 | 1       | R_VVDLMAYMASKE.- + Dimethyl (K); Dimethyl (N-term); 2 Oxidation (M)             |
| <input checked="" type="checkbox"/> | <a href="#">2442</a> | 726.8855 | 1451.7564 | 1451.7491 | 5.03 | 1     | (72)   | 9.7e-006 | 1       | R_VVDLMAYMASKE.- + Dimethyl:2H(4) (K); Dimethyl:2H(4) (N-term); 2 Oxidation (M) |
| <input checked="" type="checkbox"/> | <a href="#">3170</a> | 585.3259 | 1752.9560 | 1752.9482 | 4.42 | 1     | 38     | 0.036    | 1       | R_DGRGAAQNIIPASTGAAK.A + Dimethyl (K); Dimethyl (N-term)                        |
| <input checked="" type="checkbox"/> | <a href="#">3253</a> | 603.2852 | 1806.8337 | 1806.8213 | 6.89 | 0     | 33     | 0.032    | 1       | K_LISWYDNEYGYSNR.V + Dimethyl (N-term)                                          |

**Proteins matching the same set of peptides:**

[IPI00273646](#) Mass: 36072 Score: 475 Queries matched: 14  
Tax\_Id=10090 Gene\_Symbol=LOC100040053;LOC100042025;Gapdh;AK190093;ENSMUSG00000070490;ENSMUSG00000071343;LOC100048291;ENSMUSG00000068459;LOC100041325;LOC100042746;I

[IPI00319731](#) Mass: 37674 Score: 475 Queries matched: 14  
Tax\_Id=10090 Gene\_Symbol=LOC100044981 similar to Glyceraldehyde-3-phosphate dehydrogenase

[IPI00462008](#) Mass: 36271 Score: 475 Queries matched: 14  
Tax\_Id=10090 Gene\_Symbol=LOC100047352 similar to Glyceraldehyde-3-phosphate dehydrogenase

[IPI00620663](#) Mass: 31288 Score: 475 Queries matched: 14  
Tax\_Id=10090 Gene\_Symbol=LOC100042025 similar to Glyceraldehyde-3-phosphate dehydrogenase (GAPDH) isoform 3

[IPI00622795](#) Mass: 36074 Score: 475 Queries matched: 14  
Tax\_Id=10090 Gene\_Symbol=LOC100042427 similar to Glyceraldehyde-3-phosphate dehydrogenase (GAPDH) isoform 1

[IPI00663957](#) Mass: 36233 Score: 475 Queries matched: 14  
Tax\_Id=10090 Gene\_Symbol=LOC100045120 similar to Glyceraldehyde-3-phosphate dehydrogenase (GAPDH) isoform 1

[IPI00752289](#) Mass: 36308 Score: 475 Queries matched: 14  
Tax\_Id=10090 Gene\_Symbol=LOC100039258 similar to Glyceraldehyde-3-phosphate dehydrogenase (GAPDH) isoform 1

[IPI00848411](#) Mass: 31260 Score: 475 Queries matched: 14  
Tax\_Id=10090 Gene\_Symbol=LOC100039840 similar to Glyceraldehyde-3-phosphate dehydrogenase (GAPDH) isoform 2

[IPI00848801](#) Mass: 36100 Score: 475 Queries matched: 14  
Tax\_Id=10090 Gene\_Symbol=LOC100043724 similar to Glyceraldehyde-3-phosphate dehydrogenase (GAPDH) isoform 1

[IPI00848807](#) Mass: 35838 Score: 475 Queries matched: 14

Tax\_Id=10090 Gene\_Symbol=LOC100048253 similar to Glyceraldehyde-3-phosphate dehydrogenase (GAPDH) isoform 1  
[IPI00849031](#) Mass: 34185 Score: 475 Queries matched: 14  
 Tax\_Id=10090 Gene\_Symbol=LOC100041342;LOC100042746;LOC100046067 similar to Glyceraldehyde-3-phosphate dehydrogenase (GAPDH) isoform 2  
[IPI00849045](#) Mass: 36072 Score: 475 Queries matched: 14  
 Tax\_Id=10090 Gene\_Symbol=LOC100039762 similar to Glyceraldehyde-3-phosphate dehydrogenase  
[IPI00849049](#) Mass: 31348 Score: 475 Queries matched: 14  
 Tax\_Id=10090 Gene\_Symbol=LOC100046224;LOC100040634 similar to Glyceraldehyde-3-phosphate dehydrogenase (GAPDH) isoform 2  
[IPI00849530](#) Mass: 36074 Score: 475 Queries matched: 14  
 Tax\_Id=10090 Gene\_Symbol=LOC100039229 similar to Glyceraldehyde-3-phosphate dehydrogenase (GAPDH) isoform 1  
[IPI00850062](#) Mass: 31248 Score: 475 Queries matched: 14  
 Tax\_Id=10090 Gene\_Symbol=LOC100047232 similar to Glyceraldehyde-3-phosphate dehydrogenase (GAPDH) isoform 3  
[IPI00850243](#) Mass: 31122 Score: 475 Queries matched: 14  
 Tax\_Id=10090 Gene\_Symbol=LOC100048253 similar to Glyceraldehyde-3-phosphate dehydrogenase (GAPDH) isoform 2  
[IPI00850337](#) Mass: 36044 Score: 475 Queries matched: 14  
 Tax\_Id=10090 Gene\_Symbol=LOC100048117 similar to Glyceraldehyde-3-phosphate dehydrogenase (GAPDH) isoform 1  
[IPI00850377](#) Mass: 35975 Score: 475 Queries matched: 14  
 Tax\_Id=10090 Gene\_Symbol=LOC100039840 similar to Glyceraldehyde-3-phosphate dehydrogenase (GAPDH) isoform 1  
[IPI00850432](#) Mass: 31302 Score: 475 Queries matched: 14  
 Tax\_Id=10090 Gene\_Symbol=LOC100039229 similar to Glyceraldehyde-3-phosphate dehydrogenase (GAPDH) isoform 3  
[IPI00850434](#) Mass: 36149 Score: 475 Queries matched: 14  
 Tax\_Id=10090 Gene\_Symbol=LOC100040898;LOC100045141 similar to Glyceraldehyde-3-phosphate dehydrogenase (GAPDH) isoform 1  
[IPI00850760](#) Mass: 31520 Score: 475 Queries matched: 14  
 Tax\_Id=10090 Gene\_Symbol=LOC100039258 similar to Glyceraldehyde-3-phosphate dehydrogenase (GAPDH) isoform 3  
[IPI00851086](#) Mass: 36032 Score: 475 Queries matched: 14  
 Tax\_Id=10090 Gene\_Symbol=LOC100047232 similar to Glyceraldehyde-3-phosphate dehydrogenase (GAPDH) isoform 1  
[IPI00853668](#) Mass: 36136 Score: 475 Queries matched: 14  
 Tax\_Id=10090 Gene\_Symbol=LOC100046224;LOC100040634 similar to Glyceraldehyde-3-phosphate dehydrogenase (GAPDH) isoform 1  
[IPI00874682](#) Mass: 36038 Score: 475 Queries matched: 14  
 Tax\_Id=10090 Gene\_Symbol=- 36 kDa protein  
[IPI00874820](#) Mass: 36024 Score: 475 Queries matched: 14  
 Tax\_Id=10090 Gene\_Symbol=- 36 kDa protein  
[IPI00874964](#) Mass: 36512 Score: 475 Queries matched: 14  
 Tax\_Id=10090 Gene\_Symbol=- 36 kDa protein

15. [IPI00123313](#) Mass: 118931 Score: 470 Queries matched: 18 emPAI: 0.32

Tax\_Id=10090 Gene\_Symbol=Ubely1;Ubelx Ubiquitin-activating enzyme E1 X

Check to include this hit in error tolerant search or archive report

| Query                                                    | Observed | Mr(expt)  | Mr(calc)  | ppm  | Miss | Score | Expect   | Rank | Peptide                                                         |
|----------------------------------------------------------|----------|-----------|-----------|------|------|-------|----------|------|-----------------------------------------------------------------|
| <input checked="" type="checkbox"/> <a href="#">744</a>  | 435.2964 | 868.5783  | 868.5746  | 4.28 | 0    | 27    | 0.16     | 1    | K_NIILGGVK.A + Dimethyl (K); Dimethyl (N-term)                  |
| <input checked="" type="checkbox"/> <a href="#">750</a>  | 439.3217 | 876.6288  | 876.6248  | 4.51 | 0    | (26)  | 0.091    | 1    | K_NIILGGVK.A + Dimethyl:2H(4) (K); Dimethyl:2H(4) (N-term)      |
| <input checked="" type="checkbox"/> <a href="#">1459</a> | 389.5839 | 1165.7298 | 1165.7270 | 2.34 | 1    | 60    | 0.00013  | 1    | K_LKSDTAAAVR.Q + Dimethyl:2H(4) (K); Dimethyl:2H(4) (N-term)    |
| <input checked="" type="checkbox"/> <a href="#">1564</a> | 399.2652 | 1194.7739 | 1194.7700 | 3.23 | 1    | 61    | 6.6e-005 | 1    | R_GGIVSQVKVPK.K + 2 Dimethyl (K); Dimethyl (N-term)             |
| <input checked="" type="checkbox"/> <a href="#">1609</a> | 403.2903 | 1206.8489 | 1206.8453 | 2.97 | 1    | (45)  | 0.00048  | 1    | R_GGIVSQVKVPK.K + 2 Dimethyl:2H(4) (K); Dimethyl:2H(4) (N-term) |
| <input checked="" type="checkbox"/> <a href="#">1756</a> | 615.8231 | 1229.6317 | 1229.6252 | 5.34 | 0    | 73    | 5.7e-006 | 1    | K_QNSLDEDLIR.K + Dimethyl (N-term)                              |
| <input checked="" type="checkbox"/> <a href="#">1783</a> | 617.8356 | 1233.6566 | 1233.6503 | 5.13 | 0    | (73)  | 8.7e-006 | 1    | K_QNSLDEDLIR.K + Dimethyl:2H(4) (N-term)                        |
| <input checked="" type="checkbox"/> <a href="#">2923</a> | 551.3198 | 1650.9377 | 1650.9305 | 4.40 | 0    | 58    | 0.0003   | 1    | R_LAGTQPLEVLEAVQR.S + Dimethyl (N-term)                         |
| <input checked="" type="checkbox"/> <a href="#">2938</a> | 552.6617 | 1654.9632 | 1654.9556 | 4.62 | 0    | (47)  | 0.0036   | 1    | R_LAGTQPLEVLEAVQR.S + Dimethyl:2H(4) (N-term)                   |

|                                     |                      |          |           |           |      |   |      |          |   |                                                                      |
|-------------------------------------|----------------------|----------|-----------|-----------|------|---|------|----------|---|----------------------------------------------------------------------|
| <input checked="" type="checkbox"/> | <a href="#">3152</a> | 581.9605 | 1742.8597 | 1742.8522 | 4.31 | 0 | (79) | 1.4e-006 | 1 | R_QMNPYIQVTS HQNR.V + Dimethyl (N-term)                              |
| <input checked="" type="checkbox"/> | <a href="#">3164</a> | 583.3022 | 1746.8847 | 1746.8773 | 4.23 | 0 | (50) | 0.0018   | 1 | R_QMNPYIQVTS HQNR.V + Dimethyl:2H(4) (N-term)                        |
| <input checked="" type="checkbox"/> | <a href="#">3184</a> | 587.2918 | 1758.8536 | 1758.8471 | 3.67 | 0 | 83   | 4.7e-007 | 1 | R_QMNPYIQVTS HQNR.V + Dimethyl (N-term); Oxidation (M)               |
| <input checked="" type="checkbox"/> | <a href="#">3194</a> | 588.6342 | 1762.8807 | 1762.8723 | 4.80 | 0 | (45) | 0.0048   | 1 | R_QMNPYIQVTS HQNR.V + Dimethyl:2H(4) (N-term); Oxidation (M)         |
| <input checked="" type="checkbox"/> | <a href="#">3576</a> | 643.3329 | 1926.9768 | 1926.9646 | 6.32 | 0 | 80   | 2.1e-006 | 1 | R_NEEDATELVGLAQAVNAR.S + Dimethyl (N-term)                           |
| <input checked="" type="checkbox"/> | <a href="#">3577</a> | 643.3333 | 1926.9781 | 1926.9646 | 6.99 | 0 | (60) | 0.00023  | 1 | R_NEEDATELVGLAQAVNAR.S + Dimethyl (N-term)                           |
| <input checked="" type="checkbox"/> | <a href="#">3582</a> | 644.6745 | 1931.0017 | 1930.9898 | 6.17 | 0 | (33) | 0.12     | 1 | R_NEEDATELVGLAQAVNAR.S + Dimethyl:2H(4) (N-term)                     |
| <input checked="" type="checkbox"/> | <a href="#">3607</a> | 650.3942 | 1948.1607 | 1948.1485 | 6.28 | 0 | (39) | 0.012    | 1 | R_AAVASLLQSVQVPEFTPK.S + Dimethyl:2H(4) (K); Dimethyl:2H(4) (N-term) |
| <input checked="" type="checkbox"/> | <a href="#">3608</a> | 650.3943 | 1948.1612 | 1948.1485 | 6.53 | 0 | 41   | 0.0087   | 1 | R_AAVASLLQSVQVPEFTPK.S + Dimethyl:2H(4) (K); Dimethyl:2H(4) (N-term) |

16. [IPI00221402](#) Mass: 39787 Score: 470 Queries matched: 15 emPAI: 1.13

Tax\_Id=10090 Gene\_Symbol=Aldoa Fructose-bisphosphate aldolase A

Check to include this hit in error tolerant search or archive report

| Query                               | Observed             | Mr(expt) | Mr(calc)  | ppm       | Miss | Score | Expect | Rank     | Peptide |                                                                           |
|-------------------------------------|----------------------|----------|-----------|-----------|------|-------|--------|----------|---------|---------------------------------------------------------------------------|
| <input checked="" type="checkbox"/> | <a href="#">2224</a> | 694.8886 | 1387.7627 | 1387.7558 | 4.93 | 0     | (89)   | 2.6e-007 | 1       | K_GILAADESTGSIAK.R + Dimethyl (K); Dimethyl (N-term)                      |
| <input checked="" type="checkbox"/> | <a href="#">2244</a> | 698.9139 | 1395.8132 | 1395.8061 | 5.12 | 0     | 93     | 1.1e-007 | 1       | K_GILAADESTGSIAK.R + Dimethyl:2H(4) (K); Dimethyl:2H(4) (N-term)          |
| <input checked="" type="checkbox"/> | <a href="#">2646</a> | 761.8896 | 1521.7646 | 1521.7572 | 4.85 | 0     | 61     | 0.00011  | 1       | R_LQSIGTENTEENR.R + Dimethyl:2H(4) (N-term)                               |
| <input checked="" type="checkbox"/> | <a href="#">2698</a> | 515.6281 | 1543.8625 | 1543.8569 | 3.61 | 1     | (54)   | 0.00088  | 1       | K_GILAADESTGSIAKR.L + Dimethyl (K); Dimethyl (N-term)                     |
| <input checked="" type="checkbox"/> | <a href="#">2716</a> | 518.3116 | 1551.9131 | 1551.9072 | 3.82 | 1     | 68     | 2.9e-005 | 1       | K_GILAADESTGSIAKR.L + Dimethyl:2H(4) (K); Dimethyl:2H(4) (N-term)         |
| <input checked="" type="checkbox"/> | <a href="#">2990</a> | 558.9529 | 1673.8367 | 1673.8332 | 2.08 | 1     | (38)   | 0.026    | 1       | R_LQSIGTENTEENRR.F + Dimethyl (N-term)                                    |
| <input checked="" type="checkbox"/> | <a href="#">3006</a> | 560.2955 | 1677.8646 | 1677.8584 | 3.71 | 1     | 44     | 0.0086   | 1       | R_LQSIGTENTEENRR.F + Dimethyl:2H(4) (N-term)                              |
| <input checked="" type="checkbox"/> | <a href="#">3343</a> | 458.4922 | 1829.9398 | 1829.9343 | 2.96 | 2     | 31     | 0.17     | 1       | K_RLQSIGTENTEENRR.F + Dimethyl (N-term)                                   |
| <input checked="" type="checkbox"/> | <a href="#">3641</a> | 661.3928 | 1981.1567 | 1981.1459 | 5.46 | 1     | (46)   | 0.004    | 1       | R_IVAPGKGILAADESTGSIAK.R + 2 Dimethyl (K); Dimethyl (N-term)              |
| <input checked="" type="checkbox"/> | <a href="#">3642</a> | 661.3929 | 1981.1570 | 1981.1459 | 5.60 | 1     | (65)   | 4.7e-005 | 1       | R_IVAPGKGILAADESTGSIAK.R + 2 Dimethyl (K); Dimethyl (N-term)              |
| <input checked="" type="checkbox"/> | <a href="#">3669</a> | 665.4179 | 1993.2317 | 1993.2213 | 5.25 | 1     | 74     | 2e-006   | 1       | R_IVAPGKGILAADESTGSIAK.R + 2 Dimethyl:2H(4) (K); Dimethyl:2H(4) (N-term)  |
| <input checked="" type="checkbox"/> | <a href="#">3670</a> | 665.4179 | 1993.2319 | 1993.2213 | 5.34 | 1     | (61)   | 4e-005   | 1       | R_IVAPGKGILAADESTGSIAK.R + 2 Dimethyl:2H(4) (K); Dimethyl:2H(4) (N-term)  |
| <input checked="" type="checkbox"/> | <a href="#">3942</a> | 535.3213 | 2137.2563 | 2137.2470 | 4.34 | 2     | (43)   | 0.0051   | 1       | R_IVAPGKGILAADESTGSIAKR.L + 2 Dimethyl (K); Dimethyl (N-term)             |
| <input checked="" type="checkbox"/> | <a href="#">3948</a> | 538.3400 | 2149.3307 | 2149.3224 | 3.89 | 2     | 53     | 0.00016  | 1       | R_IVAPGKGILAADESTGSIAKR.L + 2 Dimethyl:2H(4) (K); Dimethyl:2H(4) (N-term) |
| <input checked="" type="checkbox"/> | <a href="#">3949</a> | 538.3400 | 2149.3310 | 2149.3224 | 4.02 | 2     | (40)   | 0.0038   | 1       | R_IVAPGKGILAADESTGSIAKR.L + 2 Dimethyl:2H(4) (K); Dimethyl:2H(4) (N-term) |

Proteins matching the same set of peptides:

[IPI00856247](#) Mass: 20937 Score: 470 Queries matched: 15

Tax\_Id=10090 Gene\_Symbol=Aldoa 21 kDa protein

[IPI00856379](#) Mass: 45548 Score: 470 Queries matched: 15

Tax\_Id=10090 Gene\_Symbol=Aldoa Fructose-bisphosphate aldolase

[IPI00856415](#) Mass: 14225 Score: 470 Queries matched: 15

Tax\_Id=10090 Gene\_Symbol=Aldoa 14 kDa protein

[IPI00858310](#) Mass: 26123 Score: 470 Queries matched: 15

Tax\_Id=10090 Gene\_Symbol=Aldoa 26 kDa protein

[IPI00133580](#) Mass: 39802 Score: 470 Queries matched: 15

Tax\_Id=10090 Gene\_Symbol=- Fructose-bisphosphate aldolase

17. [IPI00330804](#) Mass: 85134 Score: 431 Queries matched: 15 emPAI: 0.56

Tax\_Id=10090 Gene\_Symbol=Hsp90aa1 Heat shock protein HSP 90-alpha

Check to include this hit in error tolerant search or archive report

| Query                                                    | Observed | Mr(expt)  | Mr(calc)  | ppm  | Miss | Score | Expect   | Rank | Peptide                                                                        |
|----------------------------------------------------------|----------|-----------|-----------|------|------|-------|----------|------|--------------------------------------------------------------------------------|
| <input checked="" type="checkbox"/> <a href="#">626</a>  | 406.2921 | 810.5696  | 810.5666  | 3.60 | 0    | 26    | 0.051    | 1    | <b>K_TLVSVTK.E + Dimethyl:2H(4) (K); Dimethyl:2H(4) (N-term)</b>               |
| <input checked="" type="checkbox"/> <a href="#">668</a>  | 422.2776 | 842.5407  | 842.5378  | 3.48 | 0    | (37)  | 0.032    | 1    | <b>R_ALLFVPR.R + Dimethyl (N-term)</b>                                         |
| <input checked="" type="checkbox"/> <a href="#">670</a>  | 424.2906 | 846.5667  | 846.5629  | 4.50 | 0    | 52    | 0.00092  | 1    | <b>R_ALLFVPR.R + Dimethyl:2H(4) (N-term)</b>                                   |
| <a href="#">1956</a>                                     | 649.8915 | 1297.7685 | 1297.7605 | 6.17 | 0    | (60)  | 0.00019  | 1    | K_ADLINNLGTTIAK.S + Dimethyl (K); Dimethyl (N-term)                            |
| <a href="#">1988</a>                                     | 653.9164 | 1305.8183 | 1305.8107 | 5.81 | 0    | 69    | 1.4e-005 | 1    | K_ADLINNLGTTIAK.S + Dimethyl:2H(4) (K); Dimethyl:2H(4) (N-term)                |
| <a href="#">2276</a>                                     | 703.4070 | 1404.7995 | 1404.7898 | 6.92 | 0    | (62)  | 0.00014  | 1    | R_TLTIVDTGIGMTK.A + Dimethyl (K); Dimethyl (N-term)                            |
| <a href="#">2295</a>                                     | 707.4320 | 1412.8495 | 1412.8400 | 6.67 | 0    | (46)  | 0.0039   | 1    | R_TLTIVDTGIGMTK.A + Dimethyl:2H(4) (K); Dimethyl:2H(4) (N-term)                |
| <a href="#">2318</a>                                     | 474.6043 | 1420.7910 | 1420.7847 | 4.42 | 0    | (44)  | 0.0086   | 1    | R_TLTIVDTGIGMTK.A + Dimethyl (K); Dimethyl (N-term); Oxidation (M)             |
| <a href="#">2319</a>                                     | 711.4047 | 1420.7949 | 1420.7847 | 7.15 | 0    | 68    | 3.6e-005 | 1    | R_TLTIVDTGIGMTK.A + Dimethyl (K); Dimethyl (N-term); Oxidation (M)             |
| <a href="#">2353</a>                                     | 477.2876 | 1428.8411 | 1428.8350 | 4.26 | 0    | (44)  | 0.0079   | 1    | R_TLTIVDTGIGMTK.A + Dimethyl:2H(4) (K); Dimethyl:2H(4) (N-term); Oxidation (M) |
| <a href="#">2355</a>                                     | 715.4290 | 1428.8434 | 1428.8350 | 5.87 | 0    | (52)  | 0.0012   | 1    | R_TLTIVDTGIGMTK.A + Dimethyl:2H(4) (K); Dimethyl:2H(4) (N-term); Oxidation (M) |
| <a href="#">2692</a>                                     | 771.4176 | 1540.8207 | 1540.8097 | 7.17 | 0    | (104) | 8.9e-009 | 1    | R_GVVVSEDLPLNISR.E + Dimethyl (N-term)                                         |
| <a href="#">2699</a>                                     | 773.4298 | 1544.8451 | 1544.8348 | 6.65 | 0    | 113   | 1.1e-009 | 1    | R_GVVVSEDLPLNISR.E + Dimethyl:2H(4) (N-term)                                   |
| <input checked="" type="checkbox"/> <a href="#">3291</a> | 605.6665 | 1813.9777 | 1813.9686 | 5.02 | 0    | (36)  | 0.06     | 1    | <b>K_HLEINPDHSIETLR.Q + Dimethyl (N-term)</b>                                  |
| <input checked="" type="checkbox"/> <a href="#">3304</a> | 607.0096 | 1818.0069 | 1817.9937 | 7.25 | 0    | 37    | 0.047    | 1    | <b>K_HLEINPDHSIETLR.Q + Dimethyl:2H(4) (N-term)</b>                            |

18. [IPI00135635](#) Mass: 47145 Score: 425 Queries matched: 19 emPAI: 0.61

Tax\_Id=10090 Gene\_Symbol=Serpina3m Serine protease inhibitor A3M precursor

Check to include this hit in error tolerant search or archive report

| Query                | Observed | Mr(expt)  | Mr(calc)  | ppm   | Miss | Score | Expect   | Rank | Peptide                                                               |
|----------------------|----------|-----------|-----------|-------|------|-------|----------|------|-----------------------------------------------------------------------|
| <a href="#">1060</a> | 339.2324 | 1014.6753 | 1014.6723 | 2.91  | 1    | 25    | 0.21     | 1    | R_SVKVPMK.M + 2 Dimethyl:2H(4) (K); Dimethyl:2H(4) (N-term)           |
| <a href="#">2949</a> | 553.2935 | 1656.8587 | 1656.8505 | 4.98  | 0    | (27)  | 0.37     | 1    | R_MQQVEASLQPETLR.K + Dimethyl (N-term)                                |
| <a href="#">2950</a> | 553.2939 | 1656.8597 | 1656.8505 | 5.58  | 0    | (35)  | 0.055    | 1    | R_MQQVEASLQPETLR.K + Dimethyl (N-term)                                |
| <a href="#">2951</a> | 829.4385 | 1656.8624 | 1656.8505 | 7.20  | 0    | 80    | 2.1e-006 | 1    | R_MQQVEASLQPETLR.K + Dimethyl (N-term)                                |
| <a href="#">2969</a> | 831.4504 | 1660.8862 | 1660.8756 | 6.39  | 0    | (70)  | 2e-005   | 1    | R_MQQVEASLQPETLR.K + Dimethyl:2H(4) (N-term)                          |
| <a href="#">3003</a> | 839.4479 | 1676.8813 | 1676.8705 | 6.45  | 0    | (53)  | 0.0012   | 1    | R_MQQVEASLQPETLR.K + Dimethyl:2H(4) (N-term); Oxidation (M)           |
| <a href="#">3289</a> | 605.3359 | 1812.9858 | 1812.9767 | 5.00  | 1    | (51)  | 0.0017   | 1    | R_MQQVEASLQPETLRK.W + Dimethyl (K); Dimethyl (N-term)                 |
| <a href="#">3290</a> | 605.3363 | 1812.9871 | 1812.9767 | 5.71  | 1    | (60)  | 0.00023  | 1    | R_MQQVEASLQPETLRK.W + Dimethyl (K); Dimethyl (N-term)                 |
| <a href="#">3318</a> | 608.0194 | 1821.0364 | 1821.0270 | 5.18  | 1    | (49)  | 0.0024   | 1    | R_MQQVEASLQPETLRK.W + Dimethyl:2H(4) (K); Dimethyl:2H(4) (N-term)     |
| <a href="#">3319</a> | 608.0195 | 1821.0366 | 1821.0270 | 5.28  | 1    | 68    | 3.2e-005 | 1    | R_MQQVEASLQPETLRK.W + Dimethyl:2H(4) (K); Dimethyl:2H(4) (N-term)     |
| <a href="#">4003</a> | 731.0383 | 2190.0932 | 2190.1146 | -9.81 | 0    | (35)  | 0.047    | 1    | R_ALYQTEAFTADFQKPTEAK.N + Dimethyl:2H(4) (N-term)                     |
| <a href="#">4046</a> | 739.0402 | 2214.0987 | 2214.1208 | -9.98 | 0    | 67    | 3.3e-005 | 1    | R_ALYQTEAFTADFQKPTEAK.N + Dimethyl (K); Dimethyl (N-term)             |
| <a href="#">4047</a> | 739.0405 | 2214.0996 | 2214.1208 | -9.60 | 0    | (62)  | 0.0001   | 1    | R_ALYQTEAFTADFQKPTEAK.N + Dimethyl (K); Dimethyl (N-term)             |
| <a href="#">4048</a> | 739.0406 | 2214.1001 | 2214.1208 | -9.35 | 0    | (58)  | 0.00029  | 1    | R_ALYQTEAFTADFQKPTEAK.N + Dimethyl (K); Dimethyl (N-term)             |
| <a href="#">4049</a> | 739.0408 | 2214.1007 | 2214.1208 | -9.08 | 0    | (56)  | 0.00046  | 2    | R_ALYQTEAFTADFQKPTEAK.N + Dimethyl (K); Dimethyl (N-term)             |
| <a href="#">4074</a> | 741.7238 | 2222.1496 | 2222.1711 | -9.65 | 0    | (51)  | 0.0019   | 1    | R_ALYQTEAFTADFQKPTEAK.N + Dimethyl:2H(4) (K); Dimethyl:2H(4) (N-term) |
| <a href="#">4075</a> | 741.7238 | 2222.1497 | 2222.1711 | -9.60 | 0    | (34)  | 0.086    | 1    | R_ALYQTEAFTADFQKPTEAK.N + Dimethyl:2H(4) (K); Dimethyl:2H(4) (N-term) |
| <a href="#">4076</a> | 741.7238 | 2222.1497 | 2222.1711 | -9.60 | 0    | (42)  | 0.012    | 1    | R_ALYQTEAFTADFQKPTEAK.N + Dimethyl:2H(4) (K); Dimethyl:2H(4) (N-term) |
| <a href="#">4077</a> | 741.7239 | 2222.1498 | 2222.1711 | -9.56 | 0    | (54)  | 0.00091  | 1    | R_ALYQTEAFTADFQKPTEAK.N + Dimethyl:2H(4) (K); Dimethyl:2H(4) (N-term) |

19. [IPI00317309](#) Mass: 35787 Score: 423 Queries matched: 24 emPAI: 3.98

Tax\_Id=10090 Gene\_Symbol=Anxa5 Annexin A5

Check to include this hit in error tolerant search or archive report

| Query                                                    | Observed | Mr(expt)  | Mr(calc)  | ppm  | Miss | Score | Expect   | Rank | Peptide                                                                              |
|----------------------------------------------------------|----------|-----------|-----------|------|------|-------|----------|------|--------------------------------------------------------------------------------------|
| <input checked="" type="checkbox"/> <a href="#">1089</a> | 515.3201 | 1028.6257 | 1028.6230 | 2.67 | 0    | (57)  | 0.00034  | 1    | K_VLTEIIASR.T + Dimethyl (N-term)                                                    |
| <input checked="" type="checkbox"/> <a href="#">1108</a> | 517.3333 | 1032.6521 | 1032.6481 | 3.86 | 0    | 61    | 0.00012  | 1    | K_VLTEIIASR.T + Dimethyl:2H(4) (N-term)                                              |
| <input checked="" type="checkbox"/> <a href="#">1133</a> | 522.3046 | 1042.5947 | 1042.5910 | 3.58 | 0    | 48    | 0.003    | 1    | R_TPEELSAIK.Q + Dimethyl (K); Dimethyl (N-term)                                      |
| <input checked="" type="checkbox"/> <a href="#">1160</a> | 524.7895 | 1047.5644 | 1047.5600 | 4.19 | 0    | (44)  | 0.0068   | 1    | R_QEIAQEFK.T + Dimethyl (K); Dimethyl (N-term)                                       |
| <input checked="" type="checkbox"/> <a href="#">1168</a> | 526.3298 | 1050.6451 | 1050.6412 | 3.70 | 0    | (33)  | 0.073    | 1    | R_TPEELSAIK.Q + Dimethyl:2H(4) (K); Dimethyl:2H(4) (N-term)                          |
| <input checked="" type="checkbox"/> <a href="#">1196</a> | 528.8145 | 1055.6144 | 1055.6103 | 3.88 | 0    | 48    | 0.0028   | 1    | R_QEIAQEFK.T + Dimethyl:2H(4) (K); Dimethyl:2H(4) (N-term)                           |
| <input checked="" type="checkbox"/> <a href="#">1221</a> | 535.7936 | 1069.5726 | 1069.5695 | 2.88 | 0    | (41)  | 0.01     | 1    | R_LYDAYELK.H + Dimethyl (K); Dimethyl (N-term)                                       |
| <input checked="" type="checkbox"/> <a href="#">1232</a> | 539.8188 | 1077.6230 | 1077.6198 | 3.04 | 0    | 45    | 0.0067   | 1    | R_LYDAYELK.H + Dimethyl:2H(4) (K); Dimethyl:2H(4) (N-term)                           |
| <input checked="" type="checkbox"/> <a href="#">1375</a> | 567.8146 | 1133.6147 | 1133.6080 | 5.89 | 0    | (44)  | 0.0079   | 1    | R_SEIDLFNIR.K + Dimethyl (N-term)                                                    |
| <input checked="" type="checkbox"/> <a href="#">1385</a> | 569.8271 | 1137.6397 | 1137.6332 | 5.78 | 0    | 55    | 0.0006   | 1    | R_SEIDLFNIR.K + Dimethyl:2H(4) (N-term)                                              |
| <input checked="" type="checkbox"/> <a href="#">1620</a> | 403.9283 | 1208.7632 | 1208.7588 | 3.60 | 0    | (31)  | 0.077    | 1    | K_LIVAMMKPSR.L + Dimethyl:2H(4) (K); Dimethyl:2H(4) (N-term)                         |
| <input checked="" type="checkbox"/> <a href="#">1656</a> | 406.5764 | 1216.7075 | 1216.7035 | 3.27 | 0    | 33    | 0.09     | 1    | K_LIVAMMKPSR.L + Dimethyl (K); Dimethyl (N-term); Oxidation (M)                      |
| <input checked="" type="checkbox"/> <a href="#">1950</a> | 648.8188 | 1295.6231 | 1295.6147 | 6.55 | 0    | 46    | 0.0017   | 1    | R_GTVTDFPGFDGR.A + Dimethyl (N-term)                                                 |
| <input checked="" type="checkbox"/> <a href="#">1962</a> | 650.8308 | 1299.6471 | 1299.6398 | 5.61 | 0    | (45)  | 0.0027   | 1    | R_GTVTDFPGFDGR.A + Dimethyl:2H(4) (N-term)                                           |
| <input checked="" type="checkbox"/> <a href="#">2117</a> | 673.8597 | 1345.7049 | 1345.6951 | 7.27 | 0    | 38    | 0.028    | 1    | K_NFATSLYSMIK.G + Dimethyl (K); Dimethyl (N-term); Oxidation (M)                     |
| <input checked="" type="checkbox"/> <a href="#">2806</a> | 535.6202 | 1603.8387 | 1603.8318 | 4.32 | 1    | (35)  | 0.059    | 1    | R_SNAQRQEIAQEFK.T + Dimethyl (K); Dimethyl (N-term)                                  |
| <input checked="" type="checkbox"/> <a href="#">2815</a> | 538.3035 | 1611.8886 | 1611.8820 | 4.08 | 1    | 37    | 0.045    | 1    | R_SNAQRQEIAQEFK.T + Dimethyl:2H(4) (K); Dimethyl:2H(4) (N-term)                      |
| <input checked="" type="checkbox"/> <a href="#">3036</a> | 564.6571 | 1690.9495 | 1690.9403 | 5.42 | 1    | 62    | 0.00015  | 1    | K_GAGTDEKVLTEIIASR.T + Dimethyl:2H(4) (N-term)                                       |
| <input checked="" type="checkbox"/> <a href="#">3095</a> | 572.6600 | 1714.9583 | 1714.9465 | 6.87 | 1    | (52)  | 0.0013   | 1    | K_GAGTDEKVLTEIIASR.T + Dimethyl (K); Dimethyl (N-term)                               |
| <input checked="" type="checkbox"/> <a href="#">3133</a> | 868.4786 | 1734.9427 | 1734.9301 | 7.25 | 0    | 105   | 7.8e-009 | 1    | K_GLGTDEDSILNLLTSR.S + Dimethyl:2H(4) (N-term)                                       |
| <input checked="" type="checkbox"/> <a href="#">3830</a> | 684.3492 | 2050.0257 | 2050.0120 | 6.70 | 1    | 35    | 0.06     | 1    | R_GTVTDFPGFDGRADAEVLR.K + Dimethyl (N-term)                                          |
| <input checked="" type="checkbox"/> <a href="#">3840</a> | 685.6910 | 2054.0513 | 2054.0371 | 6.90 | 1    | (34)  | 0.083    | 1    | R_GTVTDFPGFDGRADAEVLR.K + Dimethyl:2H(4) (N-term)                                    |
| <input checked="" type="checkbox"/> <a href="#">3920</a> | 705.3974 | 2113.1704 | 2113.1540 | 7.74 | 1    | 49    | 0.0024   | 1    | K_AMKGLGTDEDSILNLLTSR.S + Dimethyl:2H(4) (K); Dimethyl:2H(4) (N-term); Oxidation (M) |
| <input checked="" type="checkbox"/> <a href="#">3921</a> | 705.3975 | 2113.1707 | 2113.1540 | 7.90 | 1    | (40)  | 0.022    | 1    | K_AMKGLGTDEDSILNLLTSR.S + Dimethyl:2H(4) (K); Dimethyl:2H(4) (N-term); Oxidation (M) |

20. [IPI00387422](#) Mass: 61818 Score: 412 Queries matched: 15 emPAI: 0.44

Tax\_Id=10090 Gene\_Symbol=Zyx zyxin

Check to include this hit in error tolerant search or archive report

| Query                                                    | Observed | Mr(expt)  | Mr(calc)  | ppm  | Miss | Score | Expect   | Rank | Peptide                                                            |
|----------------------------------------------------------|----------|-----------|-----------|------|------|-------|----------|------|--------------------------------------------------------------------|
| <input checked="" type="checkbox"/> <a href="#">544</a>  | 393.2509 | 784.4873  | 784.4847  | 3.29 | 0    | 25    | 0.43     | 1    | K_FAPVAPK.F + Dimethyl (K); Dimethyl (N-term)                      |
| <input checked="" type="checkbox"/> <a href="#">667</a>  | 421.2868 | 840.5590  | 840.5561  | 3.47 | 0    | 26    | 0.23     | 1    | K_FTPVVSQK.F + Dimethyl:2H(4) (K); Dimethyl:2H(4) (N-term)         |
| <input checked="" type="checkbox"/> <a href="#">1668</a> | 610.3585 | 1218.7024 | 1218.6972 | 4.23 | 0    | (66)  | 5.1e-005 | 1    | R_GPLSQAPTPAPK.F + Dimethyl (K); Dimethyl (N-term)                 |
| <input checked="" type="checkbox"/> <a href="#">1669</a> | 610.3587 | 1218.7029 | 1218.6972 | 4.64 | 0    | 72    | 1.4e-005 | 1    | R_GPLSQAPTPAPK.F + Dimethyl (K); Dimethyl (N-term)                 |
| <input checked="" type="checkbox"/> <a href="#">1733</a> | 614.3836 | 1226.7527 | 1226.7474 | 4.26 | 0    | (61)  | 0.00013  | 1    | R_GPLSQAPTPAPK.F + Dimethyl:2H(4) (K); Dimethyl:2H(4) (N-term)     |
| <input checked="" type="checkbox"/> <a href="#">1734</a> | 614.3837 | 1226.7529 | 1226.7474 | 4.45 | 0    | (52)  | 0.00098  | 1    | R_GPLSQAPTPAPK.F + Dimethyl:2H(4) (K); Dimethyl:2H(4) (N-term)     |
| <input checked="" type="checkbox"/> <a href="#">1735</a> | 614.3840 | 1226.7535 | 1226.7474 | 4.95 | 0    | (71)  | 1.1e-005 | 1    | R_GPLSQAPTPAPK.F + Dimethyl:2H(4) (K); Dimethyl:2H(4) (N-term)     |
| <input checked="" type="checkbox"/> <a href="#">2838</a> | 541.2846 | 1620.8320 | 1620.8260 | 3.70 | 0    | (29)  | 0.26     | 1    | K_FSPGAPSGPGPQPNQK.M + Dimethyl (K); Dimethyl (N-term)             |
| <input checked="" type="checkbox"/> <a href="#">2859</a> | 543.9680 | 1628.8820 | 1628.8762 | 3.57 | 0    | 49    | 0.0027   | 1    | K_FSPGAPSGPGPQPNQK.M + Dimethyl:2H(4) (K); Dimethyl:2H(4) (N-term) |
| <input checked="" type="checkbox"/> <a href="#">3197</a> | 589.6412 | 1765.9017 | 1765.8972 | 2.54 | 0    | 77    | 4.7e-006 | 1    | K_QHPQPPPAQNQNQVR.S + Dimethyl (N-term)                            |
| <input checked="" type="checkbox"/> <a href="#">3198</a> | 589.6415 | 1765.9027 | 1765.8972 | 3.13 | 0    | (71)  | 1.5e-005 | 1    | K_QHPQPPPAQNQNQVR.S + Dimethyl (N-term)                            |
| <input checked="" type="checkbox"/> <a href="#">3199</a> | 589.6416 | 1765.9030 | 1765.8972 | 3.27 | 0    | (71)  | 1.6e-005 | 1    | K_QHPQPPPAQNQNQVR.S + Dimethyl (N-term)                            |
| <input checked="" type="checkbox"/> <a href="#">3208</a> | 590.9833 | 1769.9282 | 1769.9223 | 3.31 | 0    | (62)  | 0.00016  | 1    | K_QHPQPPPAQNQNQVR.S + Dimethyl:2H(4) (N-term)                      |
| <input checked="" type="checkbox"/> <a href="#">3209</a> | 590.9835 | 1769.9287 | 1769.9223 | 3.62 | 0    | (56)  | 0.00054  | 1    | K_QHPQPPPAQNQNQVR.S + Dimethyl:2H(4) (N-term)                      |

[3659](#) 665.0168 1992.0287 1992.0177 5.53 0 29 0.28 1 [K\\_VNPFRRPGDSEPPVAAGAQR.A](#) + Dimethyl (N-term)

Proteins matching the same set of peptides:

[IPI00408218](#) Mass: 58244 Score: 412 Queries matched: 15

Tax\_Id=10090 Gene\_Symbol=Zyx Zyx protein

21. [IPI00553333](#) Mass: 15944 Score: 400 Queries matched: 20 emPAI: 4.23

Tax\_Id=10090 Gene\_Symbol=Hbb-b1 Hemoglobin subunit beta-1

Check to include this hit in error tolerant search or archive report

| Query                                                    | Observed | Mr(expt)  | Mr(calc)  | ppm  | Miss | Score | Expect   | Rank | Peptide                                                                                              |
|----------------------------------------------------------|----------|-----------|-----------|------|------|-------|----------|------|------------------------------------------------------------------------------------------------------|
| <input checked="" type="checkbox"/> <a href="#">1971</a> | 651.8856 | 1301.7567 | 1301.7496 | 5.48 | 0    | 43    | 0.0096   | 1    | <a href="#">R_LLTVYPWTQR.Y</a> + Dimethyl (N-term)                                                   |
| <input checked="" type="checkbox"/> <a href="#">1972</a> | 651.8861 | 1301.7577 | 1301.7496 | 6.25 | 0    | (36)  | 0.047    | 1    | <a href="#">R_LLTVYPWTQR.Y</a> + Dimethyl (N-term)                                                   |
| <input checked="" type="checkbox"/> <a href="#">1973</a> | 651.8861 | 1301.7577 | 1301.7496 | 6.25 | 0    | (36)  | 0.046    | 1    | <a href="#">R_LLTVYPWTQR.Y</a> + Dimethyl (N-term)                                                   |
| <input checked="" type="checkbox"/> <a href="#">1985</a> | 653.8981 | 1305.7817 | 1305.7747 | 5.37 | 0    | (39)  | 0.024    | 1    | <a href="#">R_LLTVYPWTQR.Y</a> + Dimethyl:2H(4) (N-term)                                             |
| <input checked="" type="checkbox"/> <a href="#">1986</a> | 653.8984 | 1305.7823 | 1305.7747 | 5.84 | 0    | (28)  | 0.27     | 1    | <a href="#">R_LLTVYPWTQR.Y</a> + Dimethyl:2H(4) (N-term)                                             |
| <input checked="" type="checkbox"/> <a href="#">1987</a> | 653.8986 | 1305.7827 | 1305.7747 | 6.11 | 0    | (36)  | 0.045    | 1    | <a href="#">R_LLTVYPWTQR.Y</a> + Dimethyl:2H(4) (N-term)                                             |
| <input checked="" type="checkbox"/> <a href="#">2057</a> | 665.8366 | 1329.6587 | 1329.6525 | 4.72 | 0    | (62)  | 5.8e-005 | 1    | <a href="#">K_VNSDEVGGEALGR.L</a> + Dimethyl (N-term)                                                |
| <input checked="" type="checkbox"/> <a href="#">2074</a> | 667.8491 | 1333.6837 | 1333.6776 | 4.62 | 0    | 78    | 2.2e-006 | 1    | <a href="#">K_VNSDEVGGEALGR.L</a> + Dimethyl:2H(4) (N-term)                                          |
| <input checked="" type="checkbox"/> <a href="#">2552</a> | 498.2946 | 1491.8618 | 1491.8562 | 3.79 | 1    | 51    | 0.0017   | 1    | <a href="#">K_VVAGVATALAHKYH.-</a> + Dimethyl (K); Dimethyl (N-term)                                 |
| <input checked="" type="checkbox"/> <a href="#">2579</a> | 500.9779 | 1499.9120 | 1499.9064 | 3.71 | 1    | (48)  | 0.0019   | 1    | <a href="#">K_VVAGVATALAHKYH.-</a> + Dimethyl:2H(4) (K); Dimethyl:2H(4) (N-term)                     |
| <input checked="" type="checkbox"/> <a href="#">3773</a> | 676.9939 | 2027.9599 | 2027.9448 | 7.42 | 0    | (29)  | 0.11     | 1    | <a href="#">R_YFDSFGDLSSASAIMGNAK.V</a> + Dimethyl:2H(4) (N-term); Oxidation (M)                     |
| <input checked="" type="checkbox"/> <a href="#">3787</a> | 679.6638 | 2035.9696 | 2035.9561 | 6.66 | 0    | (46)  | 0.0027   | 1    | <a href="#">R_YFDSFGDLSSASAIMGNAK.V</a> + Dimethyl (K); Dimethyl (N-term)                            |
| <input checked="" type="checkbox"/> <a href="#">3788</a> | 679.6641 | 2035.9704 | 2035.9561 | 7.01 | 0    | (53)  | 0.00047  | 1    | <a href="#">R_YFDSFGDLSSASAIMGNAK.V</a> + Dimethyl (K); Dimethyl (N-term)                            |
| <input checked="" type="checkbox"/> <a href="#">3789</a> | 679.6642 | 2035.9707 | 2035.9561 | 7.20 | 0    | (42)  | 0.0066   | 1    | <a href="#">R_YFDSFGDLSSASAIMGNAK.V</a> + Dimethyl (K); Dimethyl (N-term)                            |
| <input checked="" type="checkbox"/> <a href="#">3812</a> | 682.3468 | 2044.0186 | 2044.0063 | 6.00 | 0    | 57    | 0.00037  | 1    | <a href="#">R_YFDSFGDLSSASAIMGNAK.V</a> + Dimethyl:2H(4) (K); Dimethyl:2H(4) (N-term)                |
| <input checked="" type="checkbox"/> <a href="#">3813</a> | 682.3469 | 2044.0187 | 2044.0063 | 6.08 | 0    | (40)  | 0.016    | 1    | <a href="#">R_YFDSFGDLSSASAIMGNAK.V</a> + Dimethyl:2H(4) (K); Dimethyl:2H(4) (N-term)                |
| <input checked="" type="checkbox"/> <a href="#">3814</a> | 682.3478 | 2044.0215 | 2044.0063 | 7.44 | 0    | (36)  | 0.041    | 1    | <a href="#">R_YFDSFGDLSSASAIMGNAK.V</a> + Dimethyl:2H(4) (K); Dimethyl:2H(4) (N-term)                |
| <input checked="" type="checkbox"/> <a href="#">3833</a> | 684.9961 | 2051.9665 | 2051.9510 | 7.54 | 0    | (53)  | 0.00049  | 1    | <a href="#">R_YFDSFGDLSSASAIMGNAK.V</a> + Dimethyl (K); Dimethyl (N-term); Oxidation (M)             |
| <input checked="" type="checkbox"/> <a href="#">3834</a> | 684.9962 | 2051.9667 | 2051.9510 | 7.67 | 0    | (45)  | 0.0034   | 1    | <a href="#">R_YFDSFGDLSSASAIMGNAK.V</a> + Dimethyl (K); Dimethyl (N-term); Oxidation (M)             |
| <input checked="" type="checkbox"/> <a href="#">3853</a> | 687.6793 | 2060.0161 | 2060.0012 | 7.24 | 0    | (47)  | 0.0034   | 1    | <a href="#">R_YFDSFGDLSSASAIMGNAK.V</a> + Dimethyl:2H(4) (K); Dimethyl:2H(4) (N-term); Oxidation (M) |

22. [IPI00113223](#) Mass: 274994 Score: 394 Queries matched: 29 emPAI: 0.19

Tax\_Id=10090 Gene\_Symbol=Fasn Fatty acid synthase

Check to include this hit in error tolerant search or archive report

| Query                                                    | Observed | Mr(expt)  | Mr(calc)  | ppm  | Miss | Score | Expect  | Rank | Peptide                                                                       |
|----------------------------------------------------------|----------|-----------|-----------|------|------|-------|---------|------|-------------------------------------------------------------------------------|
| <input checked="" type="checkbox"/> <a href="#">915</a>  | 487.2895 | 972.5645  | 972.5604  | 4.27 | 0    | (55)  | 0.00051 | 1    | <a href="#">K_TGTVALEVR.L</a> + Dimethyl (N-term)                             |
| <input checked="" type="checkbox"/> <a href="#">926</a>  | 489.3022 | 976.5899  | 976.5855  | 4.47 | 0    | 56    | 0.00055 | 1    | <a href="#">K_TGTVALEVR.L</a> + Dimethyl:2H(4) (N-term)                       |
| <input checked="" type="checkbox"/> <a href="#">1239</a> | 542.3448 | 1082.6750 | 1082.6699 | 4.71 | 0    | 36    | 0.032   | 1    | <a href="#">R_QAPLLIGSTK.S</a> + Dimethyl (K); Dimethyl (N-term)              |
| <input checked="" type="checkbox"/> <a href="#">1270</a> | 549.3005 | 1096.5864 | 1096.5815 | 4.50 | 0    | 30    | 0.14    | 1    | <a href="#">K_YNGTGLNDR.A</a> + Dimethyl:2H(4) (N-term)                       |
| <input checked="" type="checkbox"/> <a href="#">1739</a> | 410.2195 | 1227.6368 | 1227.6332 | 2.94 | 0    | 36    | 0.033   | 1    | <a href="#">K_QAHTMDPQLR.L</a> + Dimethyl:2H(4) (N-term)                      |
| <input checked="" type="checkbox"/> <a href="#">2058</a> | 665.8706 | 1329.7267 | 1329.7190 | 5.78 | 0    | 37    | 0.039   | 1    | <a href="#">K_VGDPQELNGITR.S</a> + Dimethyl:2H(4) (N-term)                    |
| <input checked="" type="checkbox"/> <a href="#">2235</a> | 464.6031 | 1390.7876 | 1390.7820 | 4.05 | 1    | (29)  | 0.26    | 1    | <a href="#">R_LTQGEVYKELR.L</a> + Dimethyl (K); Dimethyl (N-term)             |
| <input checked="" type="checkbox"/> <a href="#">2252</a> | 467.2866 | 1398.8379 | 1398.8322 | 4.09 | 1    | 48    | 0.0024  | 1    | <a href="#">R_LTQGEVYKELR.L</a> + Dimethyl:2H(4) (K); Dimethyl:2H(4) (N-term) |

|                                     |                      |          |           |           |      |   |      |          |   |                                                                                        |
|-------------------------------------|----------------------|----------|-----------|-----------|------|---|------|----------|---|----------------------------------------------------------------------------------------|
| <input checked="" type="checkbox"/> | <a href="#">2568</a> | 750.4116 | 1498.8087 | 1498.7991 | 6.42 | 0 | 115  | 6.7e-010 | 1 | R_TLEAVQDLLEQGR.Q + Dimethyl (N-term)                                                  |
| <input checked="" type="checkbox"/> | <a href="#">2588</a> | 752.4241 | 1502.8337 | 1502.8242 | 6.32 | 0 | (98) | 3.2e-008 | 1 | R_TLEAVQDLLEQGR.Q + Dimethyl:2H(4) (N-term)                                            |
| <input checked="" type="checkbox"/> | <a href="#">2893</a> | 410.2212 | 1636.8558 | 1636.8533 | 1.52 | 1 | 28   | 0.35     | 1 | K_AVAHGGDTRDLVK.A + Dimethyl (K); Dimethyl (N-term)                                    |
| <input checked="" type="checkbox"/> | <a href="#">3156</a> | 582.3013 | 1743.8820 | 1743.8726 | 5.37 | 0 | 31   | 0.15     | 1 | K_AAMLGQEDPPQHGLPR.L + Dimethyl (N-term)                                               |
| <input checked="" type="checkbox"/> | <a href="#">3646</a> | 663.3498 | 1987.0277 | 1987.0163 | 5.75 | 0 | 51   | 0.0021   | 1 | R_WLSTSIPEAQWQSSLAR.T + Dimethyl (N-term)                                              |
| <input checked="" type="checkbox"/> | <a href="#">3654</a> | 664.6915 | 1991.0527 | 1991.0414 | 5.68 | 0 | (42) | 0.015    | 1 | R_WLSTSIPEAQWQSSLAR.T + Dimethyl:2H(4) (N-term)                                        |
| <input checked="" type="checkbox"/> | <a href="#">3655</a> | 664.6916 | 1991.0531 | 1991.0414 | 5.88 | 0 | (43) | 0.014    | 1 | R_WLSTSIPEAQWQSSLAR.T + Dimethyl:2H(4) (N-term)                                        |
| <input checked="" type="checkbox"/> | <a href="#">3671</a> | 665.6720 | 1993.9942 | 1993.9878 | 3.21 | 1 | 45   | 0.0053   | 1 | K_LQEMSSKTDSDTDTTAPK.S + 2 Dimethyl (K); Dimethyl (N-term)                             |
| <input checked="" type="checkbox"/> | <a href="#">3710</a> | 671.0038 | 2009.9897 | 2009.9827 | 3.49 | 1 | (33) | 0.074    | 1 | K_LQEMSSKTDSDTDTTAPK.S + 2 Dimethyl (K); Dimethyl (N-term); Oxidation (M)              |
| <input checked="" type="checkbox"/> | <a href="#">3761</a> | 675.0285 | 2022.0637 | 2022.0580 | 2.82 | 1 | (44) | 0.0095   | 1 | K_LQEMSSKTDSDTDTTAPK.S + 2 Dimethyl:2H(4) (K); Dimethyl:2H(4) (N-term); Oxidation (M)  |
| <input checked="" type="checkbox"/> | <a href="#">3762</a> | 675.0286 | 2022.0640 | 2022.0580 | 2.97 | 1 | (35) | 0.085    | 1 | K_LQEMSSKTDSDTDTTAPK.S + 2 Dimethyl:2H(4) (K); Dimethyl:2H(4) (N-term); Oxidation (M)  |
| <input checked="" type="checkbox"/> | <a href="#">3810</a> | 409.6312 | 2043.1197 | 2043.1126 | 3.49 | 0 | 50   | 0.0025   | 1 | R_QAPAPTAHAALPHLLHASGR.T + Dimethyl (N-term)                                           |
| <input checked="" type="checkbox"/> | <a href="#">3811</a> | 409.6312 | 2043.1197 | 2043.1126 | 3.50 | 0 | (30) | 0.22     | 1 | R_QAPAPTAHAALPHLLHASGR.T + Dimethyl (N-term)                                           |
| <input checked="" type="checkbox"/> | <a href="#">3818</a> | 410.4362 | 2047.1446 | 2047.1377 | 3.34 | 0 | (32) | 0.15     | 1 | R_QAPAPTAHAALPHLLHASGR.T + Dimethyl:2H(4) (N-term)                                     |
| <input checked="" type="checkbox"/> | <a href="#">3950</a> | 538.5377 | 2150.1217 | 2150.1140 | 3.58 | 2 | (33) | 0.11     | 1 | R_KLQEMSSKTDSDTDTTAPK.S + 3 Dimethyl (K); Dimethyl (N-term)                            |
| <input checked="" type="checkbox"/> | <a href="#">3951</a> | 538.5377 | 2150.1218 | 2150.1140 | 3.61 | 2 | (34) | 0.091    | 1 | R_KLQEMSSKTDSDTDTTAPK.S + 3 Dimethyl (K); Dimethyl (N-term)                            |
| <input checked="" type="checkbox"/> | <a href="#">3976</a> | 542.5362 | 2166.1157 | 2166.1089 | 3.13 | 2 | (30) | 0.21     | 1 | R_KLQEMSSKTDSDTDTTAPK.S + 3 Dimethyl (K); Dimethyl (N-term); Oxidation (M)             |
| <input checked="" type="checkbox"/> | <a href="#">3977</a> | 542.5363 | 2166.1162 | 2166.1089 | 3.33 | 2 | (27) | 0.45     | 1 | R_KLQEMSSKTDSDTDTTAPK.S + 3 Dimethyl (K); Dimethyl (N-term); Oxidation (M)             |
| <input checked="" type="checkbox"/> | <a href="#">3978</a> | 542.5626 | 2166.2214 | 2166.2145 | 3.19 | 2 | (30) | 0.19     | 1 | R_KLQEMSSKTDSDTDTTAPK.S + 3 Dimethyl:2H(4) (K); Dimethyl:2H(4) (N-term)                |
| <input checked="" type="checkbox"/> | <a href="#">3979</a> | 542.5627 | 2166.2217 | 2166.2145 | 3.34 | 2 | 40   | 0.018    | 1 | R_KLQEMSSKTDSDTDTTAPK.S + 3 Dimethyl:2H(4) (K); Dimethyl:2H(4) (N-term)                |
| <input checked="" type="checkbox"/> | <a href="#">4001</a> | 546.5617 | 2182.2177 | 2182.2094 | 3.81 | 2 | (26) | 0.55     | 1 | R_KLQEMSSKTDSDTDTTAPK.S + 3 Dimethyl:2H(4) (K); Dimethyl:2H(4) (N-term); Oxidation (M) |

23. [IPI00221528](#) Mass: 42319 Score: 390 Queries matched: 29 emPAI: 1.29

Tax\_Id=10090 Gene\_Symbol=4732495G21Rik 10 days neonate skin cDNA, RIKEN full-length enriched library, clone:4732493G14 product:ACTIN, CYTOPLASMIC TYPE 5 homolog

Check to include this hit in error tolerant search or archive report

| Query                | Observed | Mr(expt)  | Mr(calc)  | ppm  | Miss | Score | Expect   | Rank | Peptide                                                        |
|----------------------|----------|-----------|-----------|------|------|-------|----------|------|----------------------------------------------------------------|
| <a href="#">435</a>  | 350.7531 | 699.4916  | 699.4894  | 3.02 | 0    | (33)  | 0.032    | 1    | R_GILTLK.Y + Dimethyl (K); Dimethyl (N-term)                   |
| <a href="#">442</a>  | 354.7782 | 707.5418  | 707.5397  | 3.07 | 0    | (33)  | 0.029    | 1    | R_GILTLK.Y + Dimethyl:2H(4) (K); Dimethyl:2H(4) (N-term)       |
| <a href="#">443</a>  | 354.7784 | 707.5423  | 707.5397  | 3.76 | 0    | 42    | 0.0033   | 1    | R_GILTLK.Y + Dimethyl:2H(4) (K); Dimethyl:2H(4) (N-term)       |
| <a href="#">642</a>  | 412.2567 | 822.4988  | 822.4963  | 3.05 | 0    | 36    | 0.031    | 1    | K_IIAPPER.K + Dimethyl (N-term)                                |
| <a href="#">1187</a> | 527.7816 | 1053.5486 | 1053.5416 | 6.59 | 0    | 46    | 0.003    | 1    | R_DLTDYLMK.I + Dimethyl (K); Dimethyl (N-term)                 |
| <a href="#">1212</a> | 531.8063 | 1061.5981 | 1061.5918 | 5.91 | 0    | (43)  | 0.0091   | 1    | R_DLTDYLMK.I + Dimethyl:2H(4) (K); Dimethyl:2H(4) (N-term)     |
| <a href="#">1722</a> | 409.8839 | 1226.6297 | 1226.6264 | 2.72 | 0    | (43)  | 0.0054   | 1    | R_HQGVVMVGMGQK.D + Dimethyl (K); Dimethyl (N-term)             |
| <a href="#">1723</a> | 409.8839 | 1226.6299 | 1226.6264 | 2.86 | 0    | (31)  | 0.099    | 1    | R_HQGVVMVGMGQK.D + Dimethyl (K); Dimethyl (N-term)             |
| <a href="#">1724</a> | 614.3229 | 1226.6313 | 1226.6264 | 4.02 | 0    | 48    | 0.0019   | 1    | R_HQGVVMVGMGQK.D + Dimethyl (K); Dimethyl (N-term)             |
| <a href="#">1790</a> | 412.5673 | 1234.6801 | 1234.6766 | 2.84 | 0    | (38)  | 0.038    | 1    | R_HQGVVMVGMGQK.D + Dimethyl:2H(4) (K); Dimethyl:2H(4) (N-term) |
| <a href="#">1791</a> | 412.5673 | 1234.6802 | 1234.6766 | 2.92 | 0    | (36)  | 0.048    | 1    | R_HQGVVMVGMGQK.D + Dimethyl:2H(4) (K); Dimethyl:2H(4) (N-term) |
| <a href="#">1792</a> | 618.3480 | 1234.6814 | 1234.6766 | 3.85 | 0    | (39)  | 0.025    | 1    | R_HQGVVMVGMGQK.D + Dimethyl:2H(4) (K); Dimethyl:2H(4) (N-term) |
| <a href="#">2873</a> | 544.9758 | 1631.9057 | 1631.8990 | 4.08 | 1    | 27    | 0.48     | 2    | R_MQKEIVTLAPSTMK.I + Dimethyl (K); Dimethyl (N-term)           |
| <a href="#">3301</a> | 606.9832 | 1817.9277 | 1817.9159 | 6.49 | 0    | (46)  | 0.0048   | 1    | R_SYELPDGQVITIGNER.F + Dimethyl (N-term)                       |
| <a href="#">3302</a> | 909.9726 | 1817.9307 | 1817.9159 | 8.14 | 0    | (90)  | 2e-007   | 1    | R_SYELPDGQVITIGNER.F + Dimethyl (N-term)                       |
| <a href="#">3303</a> | 909.9731 | 1817.9317 | 1817.9159 | 8.69 | 0    | (79)  | 2.5e-006 | 1    | R_SYELPDGQVITIGNER.F + Dimethyl (N-term)                       |
| <a href="#">3323</a> | 608.3251 | 1821.9536 | 1821.9410 | 6.88 | 0    | (30)  | 0.23     | 1    | R_SYELPDGQVITIGNER.F + Dimethyl:2H(4) (N-term)                 |
| <a href="#">3324</a> | 911.9853 | 1821.9560 | 1821.9410 | 8.22 | 0    | 92    | 1.6e-007 | 1    | R_SYELPDGQVITIGNER.F + Dimethyl:2H(4) (N-term)                 |
| <a href="#">3325</a> | 911.9858 | 1821.9570 | 1821.9410 | 8.76 | 0    | (87)  | 5e-007   | 1    | R_SYELPDGQVITIGNER.F + Dimethyl:2H(4) (N-term)                 |
| <a href="#">3705</a> | 670.7178 | 2009.1315 | 2009.1197 | 5.87 | 0    | (29)  | 0.24     | 2    | R_VAPDEHPILLTEAPLNP.K.I + Dimethyl (K); Dimethyl (N-term)      |

|                      |          |           |           |      |   |      |       |   |                                                                      |
|----------------------|----------|-----------|-----------|------|---|------|-------|---|----------------------------------------------------------------------|
| <a href="#">3706</a> | 670.7178 | 2009.1315 | 2009.1197 | 5.87 | 0 | (27) | 0.41  | 2 | R_VAPDEHPILLTEAPLNPK.I + Dimethyl (K); Dimethyl (N-term)             |
| <a href="#">3707</a> | 670.7179 | 2009.1317 | 2009.1197 | 5.99 | 0 | (26) | 0.47  | 2 | R_VAPDEHPILLTEAPLNPK.I + Dimethyl (K); Dimethyl (N-term)             |
| <a href="#">3708</a> | 670.7179 | 2009.1317 | 2009.1197 | 5.99 | 0 | (32) | 0.12  | 2 | R_VAPDEHPILLTEAPLNPK.I + Dimethyl (K); Dimethyl (N-term)             |
| <a href="#">3709</a> | 670.7180 | 2009.1322 | 2009.1197 | 6.24 | 0 | (28) | 0.27  | 2 | R_VAPDEHPILLTEAPLNPK.I + Dimethyl (K); Dimethyl (N-term)             |
| <a href="#">3742</a> | 673.3995 | 2017.1767 | 2017.1699 | 3.37 | 0 | (28) | 0.2   | 2 | R_VAPDEHPILLTEAPLNPK.I + Dimethyl:2H(4) (K); Dimethyl:2H(4) (N-term) |
| <a href="#">3746</a> | 673.4012 | 2017.1817 | 2017.1699 | 5.85 | 0 | (29) | 0.14  | 2 | R_VAPDEHPILLTEAPLNPK.I + Dimethyl:2H(4) (K); Dimethyl:2H(4) (N-term) |
| <a href="#">3747</a> | 673.4013 | 2017.1821 | 2017.1699 | 6.03 | 0 | (33) | 0.065 | 2 | R_VAPDEHPILLTEAPLNPK.I + Dimethyl:2H(4) (K); Dimethyl:2H(4) (N-term) |
| <a href="#">3748</a> | 673.4015 | 2017.1827 | 2017.1699 | 6.35 | 0 | (34) | 0.044 | 2 | R_VAPDEHPILLTEAPLNPK.I + Dimethyl:2H(4) (K); Dimethyl:2H(4) (N-term) |
| <a href="#">3749</a> | 673.4017 | 2017.1832 | 2017.1699 | 6.57 | 0 | 37   | 0.026 | 2 | R_VAPDEHPILLTEAPLNPK.I + Dimethyl:2H(4) (K); Dimethyl:2H(4) (N-term) |

24. [IPI00123924](#) Mass: 46140 Score: 378 Queries matched: 18 emPAI: 0.92

Tax\_Id=10090 Gene\_Symbol=Serpinald Alpha-1-antitrypsin 1-4 precursor

Check to include this hit in error tolerant search or archive report

| Query                                                    | Observed | Mr(expt)  | Mr(calc)  | ppm   | Miss | Score | Expect   | Rank | Peptide                                                                  |
|----------------------------------------------------------|----------|-----------|-----------|-------|------|-------|----------|------|--------------------------------------------------------------------------|
| <input checked="" type="checkbox"/> <a href="#">1064</a> | 510.2946 | 1018.5746 | 1018.5699 | 4.58  | 0    | 38    | 0.028    | 1    | K_VINDFVEK.G + Dimethyl (K); Dimethyl (N-term)                           |
| <input checked="" type="checkbox"/> <a href="#">1331</a> | 558.8291 | 1115.6437 | 1115.6373 | 5.80  | 0    | 44    | 0.0083   | 1    | K_TLMSPLGITR.I + Dimethyl (N-term)                                       |
| <input checked="" type="checkbox"/> <a href="#">1345</a> | 560.8419 | 1119.6692 | 1119.6624 | 6.07  | 0    | (39)  | 0.025    | 1    | K_TLMSPLGITR.I + Dimethyl:2H(4) (N-term)                                 |
| <input checked="" type="checkbox"/> <a href="#">1368</a> | 566.8261 | 1131.6377 | 1131.6322 | 4.90  | 0    | (37)  | 0.043    | 1    | K_TLMSPLGITR.I + Dimethyl (N-term); Oxidation (M)                        |
| <input checked="" type="checkbox"/> <a href="#">1379</a> | 568.8386 | 1135.6626 | 1135.6573 | 4.65  | 0    | (40)  | 0.018    | 1    | K_TLMSPLGITR.I + Dimethyl:2H(4) (N-term); Oxidation (M)                  |
| <input checked="" type="checkbox"/> <a href="#">1452</a> | 582.8376 | 1163.6606 | 1163.6550 | 4.84  | 0    | 34    | 0.074    | 1    | R_LSIGNYNLK.T + Dimethyl (K); Dimethyl (N-term)                          |
| <input checked="" type="checkbox"/> <a href="#">1479</a> | 586.8631 | 1171.7116 | 1171.7052 | 5.49  | 0    | (26)  | 0.38     | 1    | R_LSIGNYNLK.T + Dimethyl:2H(4) (K); Dimethyl:2H(4) (N-term)              |
| <input checked="" type="checkbox"/> <a href="#">2635</a> | 506.9575 | 1517.8507 | 1517.8453 | 3.55  | 1    | 36    | 0.058    | 1    | K_VINDFVEKGTQGK.I + 2 Dimethyl (K); Dimethyl (N-term)                    |
| <input checked="" type="checkbox"/> <a href="#">2661</a> | 510.9827 | 1529.9264 | 1529.9207 | 3.70  | 1    | (25)  | 0.41     | 1    | K_VINDFVEKGTQGK.I + 2 Dimethyl:2H(4) (K); Dimethyl:2H(4) (N-term)        |
| <input checked="" type="checkbox"/> <a href="#">2992</a> | 558.9998 | 1673.9774 | 1673.9716 | 3.49  | 2    | (33)  | 0.093    | 1    | K_KVINDFVEKGTQGK.I + 3 Dimethyl (K); Dimethyl (N-term)                   |
| <input checked="" type="checkbox"/> <a href="#">3035</a> | 564.3665 | 1690.0777 | 1690.0721 | 3.36  | 2    | 34    | 0.017    | 1    | K_KVINDFVEKGTQGK.I + 3 Dimethyl:2H(4) (K); Dimethyl:2H(4) (N-term)       |
| <input checked="" type="checkbox"/> <a href="#">3849</a> | 687.0324 | 2058.0754 | 2058.0633 | 5.88  | 0    | (46)  | 0.0057   | 1    | R_IFNNGADLSGITEENAPLK.L + Dimethyl (K); Dimethyl (N-term)                |
| <input checked="" type="checkbox"/> <a href="#">3850</a> | 687.0330 | 2058.0772 | 2058.0633 | 6.77  | 0    | 62    | 0.00017  | 1    | R_IFNNGADLSGITEENAPLK.L + Dimethyl (K); Dimethyl (N-term)                |
| <input checked="" type="checkbox"/> <a href="#">4234</a> | 799.1212 | 2394.3417 | 2394.3246 | 7.16  | 1    | (82)  | 1.2e-006 | 1    | R_IFNNGADLSGITEENAPLKLSK.A + Dimethyl:2H(4) (K); Dimethyl:2H(4) (N-term) |
| <input checked="" type="checkbox"/> <a href="#">4235</a> | 799.1212 | 2394.3418 | 2394.3246 | 7.20  | 1    | 93    | 8.3e-008 | 1    | R_IFNNGADLSGITEENAPLKLSK.A + Dimethyl:2H(4) (K); Dimethyl:2H(4) (N-term) |
| <input checked="" type="checkbox"/> <a href="#">4258</a> | 805.7818 | 2414.3236 | 2414.3056 | 7.43  | 1    | (86)  | 4.6e-007 | 1    | R_IFNNGADLSGITEENAPLKLSK.A + 2 Dimethyl (K); Dimethyl (N-term)           |
| <input checked="" type="checkbox"/> <a href="#">4537</a> | 713.3945 | 2849.5487 | 2849.5650 | -5.72 | 2    | 63    | 7.9e-005 | 1    | R_IFNNGADLSGITEENAPLKLSKAVHK.A + 2 Dimethyl (K); Dimethyl (N-term)       |
| <input checked="" type="checkbox"/> <a href="#">4538</a> | 713.3948 | 2849.5500 | 2849.5650 | -5.28 | 2    | (53)  | 0.00078  | 1    | R_IFNNGADLSGITEENAPLKLSKAVHK.A + 2 Dimethyl (K); Dimethyl (N-term)       |

25. [IPI00469114](#) Mass: 15133 Score: 355 Queries matched: 14 emPAI: 2.04

Tax\_Id=10090 Gene\_Symbol=Hba-al;Hba-a2 Hemoglobin subunit alpha

Check to include this hit in error tolerant search or archive report

| Query                                                    | Observed | Mr(expt)  | Mr(calc)  | ppm  | Miss | Score | Expect   | Rank | Peptide                                                         |
|----------------------------------------------------------|----------|-----------|-----------|------|------|-------|----------|------|-----------------------------------------------------------------|
| <input checked="" type="checkbox"/> <a href="#">1244</a> | 543.2910 | 1084.5675 | 1084.5627 | 4.40 | 0    | (37)  | 0.019    | 1    | R_MFASFPTTK.T + Dimethyl (K); Dimethyl (N-term)                 |
| <input checked="" type="checkbox"/> <a href="#">1245</a> | 543.2912 | 1084.5678 | 1084.5627 | 4.74 | 0    | 56    | 0.00023  | 1    | R_MFASFPTTK.T + Dimethyl (K); Dimethyl (N-term)                 |
| <input checked="" type="checkbox"/> <a href="#">1259</a> | 547.3163 | 1092.6181 | 1092.6129 | 4.76 | 0    | (40)  | 0.016    | 1    | R_MFASFPTTK.T + Dimethyl:2H(4) (K); Dimethyl:2H(4) (N-term)     |
| <input checked="" type="checkbox"/> <a href="#">1260</a> | 547.3163 | 1092.6181 | 1092.6129 | 4.76 | 0    | (53)  | 0.00088  | 1    | R_MFASFPTTK.T + Dimethyl:2H(4) (K); Dimethyl:2H(4) (N-term)     |
| <input checked="" type="checkbox"/> <a href="#">1934</a> | 429.2765 | 1284.8078 | 1284.8042 | 2.80 | 1    | 32    | 0.069    | 1    | M_VLSGEDKSNIK.A + 2 Dimethyl:2H(4) (K); Dimethyl:2H(4) (N-term) |
| <input checked="" type="checkbox"/> <a href="#">2721</a> | 519.9285 | 1556.7637 | 1556.7583 | 3.49 | 0    | (78)  | 1.6e-006 | 1    | K_IGGHGAEYGAEALER.M + Dimethyl (N-term)                         |
| <input checked="" type="checkbox"/> <a href="#">2722</a> | 519.9289 | 1556.7647 | 1556.7583 | 4.13 | 0    | (70)  | 1.2e-005 | 1    | K_IGGHGAEYGAEALER.M + Dimethyl (N-term)                         |





Proteins matching the same set of peptides:

[IPI00648173](#) Mass: 193631 Score: 308 Queries matched: 9

Tax\_Id=10090 Gene\_Symbol=Cltc Clathrin, heavy polypeptide

28. [IPI00131138](#) Mass: 283869 Score: 297 Queries matched: 18 emPAI: 0.13

Tax\_Id=10090 Gene\_Symbol=Flna Isoform 1 of Filamin-A

Check to include this hit in error tolerant search or archive report

| Query                                                    | Observed | Mr(expt)  | Mr(calc)  | ppm  | Miss | Score | Expect   | Rank | Peptide                                                                            |
|----------------------------------------------------------|----------|-----------|-----------|------|------|-------|----------|------|------------------------------------------------------------------------------------|
| <input checked="" type="checkbox"/> <a href="#">837</a>  | 469.8072 | 937.5998  | 937.5960  | 3.97 | 0    | 35    | 0.036    | 1    | K <sub>2</sub> AGVAPLQVK.V + Dimethyl (K); Dimethyl (N-term)                       |
| <input checked="" type="checkbox"/> <a href="#">853</a>  | 473.8323 | 945.6501  | 945.6463  | 4.01 | 0    | (28)  | 0.12     | 1    | K <sub>2</sub> AGVAPLQVK.V + Dimethyl:2H(4) (K); Dimethyl:2H(4) (N-term)           |
| <input checked="" type="checkbox"/> <a href="#">1359</a> | 564.3087 | 1126.6029 | 1126.5982 | 4.14 | 0    | 30    | 0.12     | 1    | K <sub>2</sub> GTVEPQLLEAR.G + Dimethyl (N-term)                                   |
| <input checked="" type="checkbox"/> <a href="#">1453</a> | 388.8970 | 1163.6691 | 1163.6663 | 2.43 | 0    | 56    | 0.00045  | 1    | R <sub>2</sub> ALTQTGGPHVK.A + Dimethyl (K); Dimethyl (N-term)                     |
| <input checked="" type="checkbox"/> <a href="#">1480</a> | 391.5804 | 1171.7193 | 1171.7165 | 2.41 | 0    | (54)  | 0.00062  | 1    | R <sub>2</sub> ALTQTGGPHVK.A + Dimethyl:2H(4) (K); Dimethyl:2H(4) (N-term)         |
| <input checked="" type="checkbox"/> <a href="#">1952</a> | 648.8732 | 1295.7319 | 1295.7238 | 6.28 | 0    | 45    | 0.0062   | 1    | R <sub>2</sub> AWGPGLEGGIVGK.S + Dimethyl (K); Dimethyl (N-term)                   |
| <input checked="" type="checkbox"/> <a href="#">1979</a> | 652.8981 | 1303.7817 | 1303.7740 | 5.91 | 0    | (38)  | 0.031    | 1    | R <sub>2</sub> AWGPGLEGGIVGK.S + Dimethyl:2H(4) (K); Dimethyl:2H(4) (N-term)       |
| <input checked="" type="checkbox"/> <a href="#">2233</a> | 348.4603 | 1389.8120 | 1389.8092 | 1.97 | 1    | 33    | 0.097    | 1    | R <sub>2</sub> VNVGAGSHPNKVK.V + 2 Dimethyl (K); Dimethyl (N-term)                 |
| <input checked="" type="checkbox"/> <a href="#">2260</a> | 351.4792 | 1401.8875 | 1401.8846 | 2.11 | 1    | (27)  | 0.16     | 1    | R <sub>2</sub> VNVGAGSHPNKVK.V + 2 Dimethyl:2H(4) (K); Dimethyl:2H(4) (N-term)     |
| <input checked="" type="checkbox"/> <a href="#">2526</a> | 742.8882 | 1483.7618 | 1483.7532 | 5.82 | 0    | 77    | 3.3e-006 | 1    | K <sub>2</sub> AFGPGQLQGGNAGSPAR.F + Dimethyl (N-term)                             |
| <input checked="" type="checkbox"/> <a href="#">2547</a> | 745.9008 | 1489.7871 | 1489.7776 | 6.33 | 0    | 58    | 0.0003   | 1    | R <sub>2</sub> ANLPQSFQVDTSK.A + Dimethyl (K); Dimethyl (N-term)                   |
| <input checked="" type="checkbox"/> <a href="#">2567</a> | 749.9263 | 1497.8381 | 1497.8279 | 6.82 | 0    | (34)  | 0.085    | 1    | R <sub>2</sub> ANLPQSFQVDTSK.A + Dimethyl:2H(4) (K); Dimethyl:2H(4) (N-term)       |
| <input checked="" type="checkbox"/> <a href="#">3422</a> | 619.6769 | 1856.0090 | 1856.0004 | 4.66 | 1    | 39    | 0.028    | 1    | K <sub>2</sub> VAQPSITDNKDGTVTVR.Y + Dimethyl (K); Dimethyl (N-term)               |
| <input checked="" type="checkbox"/> <a href="#">3433</a> | 622.3604 | 1864.0594 | 1864.0506 | 4.73 | 1    | (29)  | 0.23     | 1    | K <sub>2</sub> VAQPSITDNKDGTVTVR.Y + Dimethyl:2H(4) (K); Dimethyl:2H(4) (N-term)   |
| <input checked="" type="checkbox"/> <a href="#">3450</a> | 625.6731 | 1873.9975 | 1873.9898 | 4.09 | 0    | (36)  | 0.058    | 1    | K <sub>2</sub> VATVPQHATSGPGPADVSK.V + Dimethyl (K); Dimethyl (N-term)             |
| <input checked="" type="checkbox"/> <a href="#">3489</a> | 628.3569 | 1882.0487 | 1882.0400 | 4.62 | 0    | 45    | 0.0079   | 1    | K <sub>2</sub> VATVPQHATSGPGPADVSK.V + Dimethyl:2H(4) (K); Dimethyl:2H(4) (N-term) |
| <input checked="" type="checkbox"/> <a href="#">4133</a> | 758.4082 | 2272.2027 | 2272.1902 | 5.50 | 1    | (42)  | 0.015    | 1    | R <sub>2</sub> AGGPGLERAAGVPAEFGIWTR.E + Dimethyl:2H(4) (N-term)                   |
| <input checked="" type="checkbox"/> <a href="#">4134</a> | 758.4083 | 2272.2031 | 2272.1902 | 5.69 | 1    | 46    | 0.006    | 1    | R <sub>2</sub> AGGPGLERAAGVPAEFGIWTR.E + Dimethyl:2H(4) (N-term)                   |

29. [IPI00380873](#) Mass: 46510 Score: 288 Queries matched: 21 emPAI: 1.25

Tax\_Id=10090 Gene\_Symbol=Sec14l3 Novel protein, ortholog of human and rat SEC14-like 3 (S. cerevisiae) SEC14L3

Check to include this hit in error tolerant search or archive report

| Query                                                    | Observed | Mr(expt)  | Mr(calc)  | ppm  | Miss | Score | Expect | Rank | Peptide                                                                  |
|----------------------------------------------------------|----------|-----------|-----------|------|------|-------|--------|------|--------------------------------------------------------------------------|
| <input checked="" type="checkbox"/> <a href="#">636</a>  | 410.7331 | 819.4516  | 819.4490  | 3.10 | 0    | (32)  | 0.071  | 1    | R <sub>2</sub> NFDLQK.S + Dimethyl (K); Dimethyl (N-term)                |
| <input checked="" type="checkbox"/> <a href="#">649</a>  | 414.7581 | 827.5017  | 827.4993  | 2.92 | 0    | 35    | 0.041  | 1    | R <sub>2</sub> NFDLQK.S + Dimethyl:2H(4) (K); Dimethyl:2H(4) (N-term)    |
| <input checked="" type="checkbox"/> <a href="#">801</a>  | 460.7967 | 919.5788  | 919.5742  | 4.99 | 0    | (33)  | 0.073  | 1    | K <sub>2</sub> GLLFSVTK.Q + Dimethyl (K); Dimethyl (N-term)              |
| <input checked="" type="checkbox"/> <a href="#">814</a>  | 464.8217 | 927.6289  | 927.6245  | 4.81 | 0    | 33    | 0.03   | 1    | K <sub>2</sub> GLLFSVTK.Q + Dimethyl:2H(4) (K); Dimethyl:2H(4) (N-term)  |
| <input checked="" type="checkbox"/> <a href="#">1150</a> | 523.7999 | 1045.5852 | 1045.5808 | 4.22 | 0    | (32)  | 0.12   | 1    | K <sub>2</sub> INYGGEIPK.S + Dimethyl (K); Dimethyl (N-term)             |
| <input checked="" type="checkbox"/> <a href="#">1151</a> | 523.8000 | 1045.5855 | 1045.5808 | 4.57 | 0    | 50    | 0.0018 | 1    | K <sub>2</sub> INYGGEIPK.S + Dimethyl (K); Dimethyl (N-term)             |
| <input checked="" type="checkbox"/> <a href="#">1188</a> | 527.8248 | 1053.6351 | 1053.6310 | 3.90 | 0    | (29)  | 0.21   | 1    | K <sub>2</sub> INYGGEIPK.S + Dimethyl:2H(4) (K); Dimethyl:2H(4) (N-term) |
| <input checked="" type="checkbox"/> <a href="#">1189</a> | 527.8253 | 1053.6360 | 1053.6310 | 4.71 | 0    | (49)  | 0.0022 | 1    | K <sub>2</sub> INYGGEIPK.S + Dimethyl:2H(4) (K); Dimethyl:2H(4) (N-term) |
| <input checked="" type="checkbox"/> <a href="#">2182</a> | 459.2382 | 1374.6927 | 1374.6892 | 2.59 | 0    | (32)  | 0.083  | 1    | K <sub>2</sub> TQYEHSVQISR.G + Dimethyl (N-term)                         |
| <input checked="" type="checkbox"/> <a href="#">2197</a> | 460.5800 | 1378.7181 | 1378.7143 | 2.80 | 0    | 35    | 0.056  | 1    | K <sub>2</sub> TQYEHSVQISR.G + Dimethyl:2H(4) (N-term)                   |
| <input checked="" type="checkbox"/> <a href="#">2701</a> | 515.9947 | 1544.9622 | 1544.9541 | 5.24 | 1    | 37    | 0.017  | 1    | K <sub>2</sub> GLLFSVTKQDLK.T + 2 Dimethyl (K); Dimethyl (N-term)        |

|                                     |                      |          |           |           |      |   |      |          |   |                                                                                 |
|-------------------------------------|----------------------|----------|-----------|-----------|------|---|------|----------|---|---------------------------------------------------------------------------------|
| <input checked="" type="checkbox"/> | <a href="#">2726</a> | 520.0200 | 1557.0380 | 1557.0295 | 5.49 | 1 | (34) | 0.0053   | 1 | K_GLLFSVTKQDLLK.T + 2 Dimethyl:2H(4) (K); Dimethyl:2H(4) (N-term)               |
| <input checked="" type="checkbox"/> | <a href="#">2917</a> | 549.9648 | 1646.8727 | 1646.8661 | 3.99 | 1 | (63) | 0.00011  | 1 | R_QKAGEMVEVLTSQR.Y + Dimethyl (K); Dimethyl (N-term); Oxidation (M)             |
| <input checked="" type="checkbox"/> | <a href="#">2937</a> | 552.6480 | 1654.9222 | 1654.9164 | 3.53 | 1 | 67   | 4.9e-005 | 1 | R_QKAGEMVEVLTSQR.Y + Dimethyl:2H(4) (K); Dimethyl:2H(4) (N-term); Oxidation (M) |
| <input checked="" type="checkbox"/> | <a href="#">3110</a> | 576.3569 | 1726.0488 | 1726.0393 | 5.52 | 1 | (34) | 0.042    | 1 | K_IVVLGNSWKEGLLK.L + 2 Dimethyl (K); Dimethyl (N-term)                          |
| <input checked="" type="checkbox"/> | <a href="#">3111</a> | 576.3569 | 1726.0488 | 1726.0393 | 5.52 | 1 | (33) | 0.043    | 1 | K_IVVLGNSWKEGLLK.L + 2 Dimethyl (K); Dimethyl (N-term)                          |
| <input checked="" type="checkbox"/> | <a href="#">3143</a> | 580.3822 | 1738.1248 | 1738.1146 | 5.85 | 1 | 36   | 0.0047   | 1 | K_IVVLGNSWKEGLLK.L + 2 Dimethyl:2H(4) (K); Dimethyl:2H(4) (N-term)              |
| <input checked="" type="checkbox"/> | <a href="#">4307</a> | 616.0740 | 2460.2670 | 2460.2536 | 5.44 | 0 | (28) | 0.34     | 1 | K_LISPEELPAHFGGTLTDPDGNPK.C + Dimethyl (K); Dimethyl (N-term)                   |
| <input checked="" type="checkbox"/> | <a href="#">4308</a> | 821.0975 | 2460.2707 | 2460.2536 | 6.94 | 0 | 70   | 2.4e-005 | 1 | K_LISPEELPAHFGGTLTDPDGNPK.C + Dimethyl (K); Dimethyl (N-term)                   |
| <input checked="" type="checkbox"/> | <a href="#">4309</a> | 821.0975 | 2460.2708 | 2460.2536 | 6.96 | 0 | (57) | 0.00044  | 1 | K_LISPEELPAHFGGTLTDPDGNPK.C + Dimethyl (K); Dimethyl (N-term)                   |
| <input checked="" type="checkbox"/> | <a href="#">4326</a> | 823.7807 | 2468.3203 | 2468.3039 | 6.64 | 0 | (51) | 0.0021   | 1 | K_LISPEELPAHFGGTLTDPDGNPK.C + Dimethyl:2H(4) (K); Dimethyl:2H(4) (N-term)       |

30. [IPI00110753](#) Mass: 50788 Score: 282 Queries matched: 16 emPAI: 0.72

Tax\_Id=10090 Gene\_Symbol=Tubala Tubulin alpha-1A chain

Check to include this hit in error tolerant search or archive report

| Query                               | Observed             | Mr(expt) | Mr(calc)  | ppm       | Miss | Score | Expect | Rank     | Peptide |                                                                         |
|-------------------------------------|----------------------|----------|-----------|-----------|------|-------|--------|----------|---------|-------------------------------------------------------------------------|
| <input checked="" type="checkbox"/> | <a href="#">3114</a> | 577.3208 | 1728.9407 | 1728.9298 | 6.31 | 0     | (53)   | 0.0013   | 1       | R_AVFVDLEPTVIDEVR.T + Dimethyl (N-term)                                 |
| <input checked="" type="checkbox"/> | <a href="#">3115</a> | 865.4796 | 1728.9447 | 1728.9298 | 8.62 | 0     | (75)   | 7.8e-006 | 1       | R_AVFVDLEPTVIDEVR.T + Dimethyl (N-term)                                 |
| <input checked="" type="checkbox"/> | <a href="#">3126</a> | 578.6624 | 1732.9654 | 1732.9549 | 6.05 | 0     | (34)   | 0.08     | 1       | R_AVFVDLEPTVIDEVR.T + Dimethyl:2H(4) (N-term)                           |
| <input checked="" type="checkbox"/> | <a href="#">3128</a> | 867.4916 | 1732.9687 | 1732.9549 | 7.96 | 0     | (81)   | 1.8e-006 | 1       | R_AVFVDLEPTVIDEVR.T + Dimethyl:2H(4) (N-term)                           |
| <input checked="" type="checkbox"/> | <a href="#">3129</a> | 867.4918 | 1732.9690 | 1732.9549 | 8.10 | 0     | 87     | 4.6e-007 | 1       | R_AVFVDLEPTVIDEVR.T + Dimethyl:2H(4) (N-term)                           |
| <input checked="" type="checkbox"/> | <a href="#">3285</a> | 605.0175 | 1812.0307 | 1812.0185 | 6.73 | 0     | 38     | 0.033    | 1       | R_IHFPLATYAPVISAEK.A + Dimethyl (K); Dimethyl (N-term)                  |
| <input checked="" type="checkbox"/> | <a href="#">3286</a> | 605.0176 | 1812.0311 | 1812.0185 | 6.93 | 0     | (31)   | 0.16     | 1       | R_IHFPLATYAPVISAEK.A + Dimethyl (K); Dimethyl (N-term)                  |
| <input checked="" type="checkbox"/> | <a href="#">3317</a> | 607.7013 | 1820.0821 | 1820.0688 | 7.30 | 0     | (33)   | 0.063    | 1       | R_IHFPLATYAPVISAEK.A + Dimethyl:2H(4) (K); Dimethyl:2H(4) (N-term)      |
| <input checked="" type="checkbox"/> | <a href="#">4154</a> | 770.0832 | 2307.2277 | 2307.2111 | 7.21 | 1     | 43     | 0.013    | 1       | R_AVFVDLEPTVIDEVRTGTYSR.Q + Dimethyl (N-term)                           |
| <input checked="" type="checkbox"/> | <a href="#">4155</a> | 770.0835 | 2307.2287 | 2307.2111 | 7.62 | 1     | (31)   | 0.2      | 1       | R_AVFVDLEPTVIDEVRTGTYSR.Q + Dimethyl (N-term)                           |
| <input checked="" type="checkbox"/> | <a href="#">4157</a> | 771.4249 | 2311.2530 | 2311.2362 | 7.25 | 1     | (32)   | 0.14     | 1       | R_AVFVDLEPTVIDEVRTGTYSR.Q + Dimethyl:2H(4) (N-term)                     |
| <input checked="" type="checkbox"/> | <a href="#">4331</a> | 618.5760 | 2470.2749 | 2470.2604 | 5.84 | 1     | (34)   | 0.082    | 1       | R_QLFHPEQLITGKEDAANNYAR.G + Dimethyl (K); Dimethyl (N-term)             |
| <input checked="" type="checkbox"/> | <a href="#">4332</a> | 618.5762 | 2470.2757 | 2470.2604 | 6.19 | 1     | 36     | 0.06     | 1       | R_QLFHPEQLITGKEDAANNYAR.G + Dimethyl (K); Dimethyl (N-term)             |
| <input checked="" type="checkbox"/> | <a href="#">4339</a> | 620.5885 | 2478.3247 | 2478.3107 | 5.68 | 1     | (35)   | 0.08     | 1       | R_QLFHPEQLITGKEDAANNYAR.G + Dimethyl:2H(4) (K); Dimethyl:2H(4) (N-term) |
| <input checked="" type="checkbox"/> | <a href="#">4340</a> | 620.5886 | 2478.3254 | 2478.3107 | 5.94 | 1     | (36)   | 0.066    | 1       | R_QLFHPEQLITGKEDAANNYAR.G + Dimethyl:2H(4) (K); Dimethyl:2H(4) (N-term) |
| <input checked="" type="checkbox"/> | <a href="#">4357</a> | 639.0688 | 2552.2463 | 2552.2296 | 6.54 | 1     | 34     | 0.063    | 1       | K_TIGGGDDSFNTFFSETGAGKHVPR.A + Dimethyl (K); Dimethyl (N-term)          |

Proteins matching the same set of peptides:

[IPI00117348](#) Mass: 50804 Score: 282 Queries matched: 16

Tax\_Id=10090 Gene\_Symbol=Tubalb Tubulin alpha-1B chain

[IPI00403810](#) Mass: 50562 Score: 282 Queries matched: 16

Tax\_Id=10090 Gene\_Symbol=Tubalc Tubulin alpha-1C chain

31. [IPI00117352](#) Mass: 50095 Score: 267 Queries matched: 10 emPAI: 0.57

Tax\_Id=10090 Gene\_Symbol=Tubb5 Tubulin beta-5 chain

Check to include this hit in error tolerant search or archive report

| Query                | Observed | Mr(expt)  | Mr(calc)  | ppm  | Miss | Score | Expect | Rank | Peptide                           |
|----------------------|----------|-----------|-----------|------|------|-------|--------|------|-----------------------------------|
| <a href="#">1218</a> | 534.3191 | 1066.6236 | 1066.6175 | 5.74 | 0    | 28    | 0.26   | 1    | R_YLTVAAVFR.G + Dimethyl (N-term) |

|                                                          |          |           |           |      |   |      |          |   |                                                             |
|----------------------------------------------------------|----------|-----------|-----------|------|---|------|----------|---|-------------------------------------------------------------|
| <a href="#">1466</a>                                     | 586.3401 | 1170.6657 | 1170.6583 | 6.32 | 0 | (40) | 0.025    | 1 | K_LAVNMVFPFR.L + Dimethyl (N-term)                          |
| <a href="#">1493</a>                                     | 588.3533 | 1174.6921 | 1174.6834 | 7.38 | 0 | 57   | 0.00044  | 1 | K_LAVNMVFPFR.L + Dimethyl:2H(4) (N-term)                    |
| <input checked="" type="checkbox"/> <a href="#">2901</a> | 548.6306 | 1642.8698 | 1642.8600 | 5.98 | 0 | (46) | 0.0061   | 1 | R_AILVDLEPGTMSVR.S + Dimethyl (N-term)                      |
| <input checked="" type="checkbox"/> <a href="#">2902</a> | 822.4436 | 1642.8727 | 1642.8600 | 7.74 | 0 | 94   | 1.1e-007 | 1 | R_AILVDLEPGTMSVR.S + Dimethyl (N-term)                      |
| <input checked="" type="checkbox"/> <a href="#">2918</a> | 824.4564 | 1646.8982 | 1646.8851 | 7.92 | 0 | (70) | 2.3e-005 | 1 | R_AILVDLEPGTMSVR.S + Dimethyl:2H(4) (N-term)                |
| <a href="#">2926</a>                                     | 551.6392 | 1651.8958 | 1651.8847 | 6.75 | 0 | 47   | 0.0044   | 1 | R_LHFFMPGFAPLTSR.G + Dimethyl:2H(4) (N-term)                |
| <input checked="" type="checkbox"/> <a href="#">2960</a> | 830.4421 | 1658.8697 | 1658.8549 | 8.92 | 0 | (83) | 1.1e-006 | 1 | R_AILVDLEPGTMSVR.S + Dimethyl (N-term); Oxidation (M)       |
| <input checked="" type="checkbox"/> <a href="#">2976</a> | 832.4550 | 1662.8954 | 1662.8800 | 9.22 | 0 | (64) | 8.9e-005 | 1 | R_AILVDLEPGTMSVR.S + Dimethyl:2H(4) (N-term); Oxidation (M) |
| <a href="#">4269</a>                                     | 609.3290 | 2433.2867 | 2433.2726 | 5.81 | 2 | 27   | 0.5      | 2 | K_IREEYPRIMNTFSVVPSPK.V + Dimethyl (K); Dimethyl (N-term)   |

32. [IPI00624663](#) Mass: 168602 Score: 257 Queries matched: 10 emPAI: 0.16

Tax\_Id=10090 Gene\_Symbol=Pzpp Alpha-2-macroglobulin precursor

Check to include this hit in error tolerant search or archive report

| Query                                                    | Observed | Mr(expt)  | Mr(calc)  | ppm  | Miss | Score | Expect  | Rank | Peptide                                                        |
|----------------------------------------------------------|----------|-----------|-----------|------|------|-------|---------|------|----------------------------------------------------------------|
| <input checked="" type="checkbox"/> <a href="#">1044</a> | 505.2793 | 1008.5440 | 1008.5392 | 4.76 | 0    | (45)  | 0.0045  | 1    | K_ALSFYQPR.A + Dimethyl (N-term)                               |
| <input checked="" type="checkbox"/> <a href="#">1053</a> | 507.2919 | 1012.5693 | 1012.5644 | 4.89 | 0    | 47    | 0.0027  | 1    | K_ALSFYQPR.A + Dimethyl:2H(4) (N-term)                         |
| <input checked="" type="checkbox"/> <a href="#">1138</a> | 522.8105 | 1043.6065 | 1043.6015 | 4.80 | 0    | (49)  | 0.0025  | 1    | K_TVSWAVTPK.S + Dimethyl (K); Dimethyl (N-term)                |
| <input checked="" type="checkbox"/> <a href="#">1177</a> | 526.8356 | 1051.6567 | 1051.6518 | 4.70 | 0    | 52    | 0.00081 | 1    | K_TVSWAVTPK.S + Dimethyl:2H(4) (K); Dimethyl:2H(4) (N-term)    |
| <input checked="" type="checkbox"/> <a href="#">1581</a> | 400.9178 | 1199.7315 | 1199.7278 | 3.12 | 1    | 49    | 0.0019  | 1    | R_KTVSWAVTPK.S + 2 Dimethyl (K); Dimethyl (N-term)             |
| <input checked="" type="checkbox"/> <a href="#">1641</a> | 404.9429 | 1211.8069 | 1211.8031 | 3.09 | 1    | (28)  | 0.071   | 1    | R_KTVSWAVTPK.S + 2 Dimethyl:2H(4) (K); Dimethyl:2H(4) (N-term) |
| <input checked="" type="checkbox"/> <a href="#">1880</a> | 633.8275 | 1265.6405 | 1265.6351 | 4.28 | 0    | (61)  | 0.0001  | 1    | R_DLSSSDLSTASK.I + Dimethyl (K); Dimethyl (N-term)             |
| <input checked="" type="checkbox"/> <a href="#">1904</a> | 637.8525 | 1273.6905 | 1273.6853 | 4.11 | 0    | 61    | 0.00014 | 1    | R_DLSSSDLSTASK.I + Dimethyl:2H(4) (K); Dimethyl:2H(4) (N-term) |
| <input checked="" type="checkbox"/> <a href="#">2038</a> | 663.3686 | 1324.7227 | 1324.7139 | 6.66 | 0    | (45)  | 0.0062  | 1    | K_AINYLISGYQR.Q + Dimethyl (N-term)                            |
| <input checked="" type="checkbox"/> <a href="#">2055</a> | 665.3812 | 1328.7478 | 1328.7390 | 6.59 | 0    | 79    | 3e-006  | 1    | K_AINYLISGYQR.Q + Dimethyl:2H(4) (N-term)                      |

33. [IPI00622235](#) Mass: 89950 Score: 248 Queries matched: 13 emPAI: 0.40

Tax\_Id=10090 Gene\_Symbol=Vcp Transitional endoplasmic reticulum ATPase

Check to include this hit in error tolerant search or archive report

| Query                                                    | Observed | Mr(expt)  | Mr(calc)  | ppm  | Miss | Score | Expect   | Rank | Peptide                                                           |
|----------------------------------------------------------|----------|-----------|-----------|------|------|-------|----------|------|-------------------------------------------------------------------|
| <input checked="" type="checkbox"/> <a href="#">1287</a> | 552.2901 | 1102.5657 | 1102.5618 | 3.55 | 0    | (53)  | 0.00053  | 1    | K_LAGESESNLR.K + Dimethyl (N-term)                                |
| <input checked="" type="checkbox"/> <a href="#">1297</a> | 553.3131 | 1104.6117 | 1104.6067 | 4.53 | 0    | 46    | 0.0049   | 1    | K_DVDLEFLAK.M + Dimethyl (K); Dimethyl (N-term)                   |
| <input checked="" type="checkbox"/> <a href="#">1304</a> | 554.3029 | 1106.5912 | 1106.5869 | 3.83 | 0    | 63    | 8.5e-005 | 1    | K_LAGESESNLR.K + Dimethyl:2H(4) (N-term)                          |
| <input checked="" type="checkbox"/> <a href="#">1415</a> | 384.2462 | 1149.7166 | 1149.7121 | 3.93 | 0    | 43    | 0.0071   | 1    | R_LEILQHTK.N + Dimethyl (K); Dimethyl (N-term)                    |
| <input checked="" type="checkbox"/> <a href="#">1658</a> | 406.8622 | 1217.5647 | 1217.5611 | 2.96 | 1    | 30    | 0.036    | 1    | R_RDHFEEAMR.F + Dimethyl (N-term)                                 |
| <input checked="" type="checkbox"/> <a href="#">1688</a> | 408.2038 | 1221.5897 | 1221.5862 | 2.86 | 1    | (29)  | 0.088    | 1    | R_RDHFEEAMR.F + Dimethyl:2H(4) (N-term)                           |
| <input checked="" type="checkbox"/> <a href="#">1864</a> | 420.5710 | 1258.6910 | 1258.6881 | 2.36 | 1    | (42)  | 0.011    | 1    | K_LAGESESNLRK.A + Dimethyl (K); Dimethyl (N-term)                 |
| <input checked="" type="checkbox"/> <a href="#">1885</a> | 423.2545 | 1266.7417 | 1266.7383 | 2.70 | 1    | 61    | 0.00016  | 1    | K_LAGESESNLRK.A + Dimethyl:2H(4) (K); Dimethyl:2H(4) (N-term)     |
| <input checked="" type="checkbox"/> <a href="#">2134</a> | 679.3691 | 1356.7237 | 1356.7150 | 6.45 | 0    | 67    | 3.3e-005 | 1    | R_WALSQSNPSALR.E + Dimethyl (N-term)                              |
| <input checked="" type="checkbox"/> <a href="#">3026</a> | 562.6305 | 1684.8697 | 1684.8606 | 5.35 | 1    | (47)  | 0.0038   | 1    | R_KYEMFAQTLQQR.G + Dimethyl (K); Dimethyl (N-term)                |
| <input checked="" type="checkbox"/> <a href="#">3027</a> | 562.6305 | 1684.8697 | 1684.8606 | 5.39 | 1    | 54    | 0.00082  | 1    | R_KYEMFAQTLQQR.G + Dimethyl (K); Dimethyl (N-term)                |
| <input checked="" type="checkbox"/> <a href="#">3048</a> | 565.3138 | 1692.9195 | 1692.9109 | 5.10 | 1    | (39)  | 0.03     | 1    | R_KYEMFAQTLQQR.G + Dimethyl:2H(4) (K); Dimethyl:2H(4) (N-term)    |
| <input checked="" type="checkbox"/> <a href="#">3222</a> | 593.7088 | 1778.1046 | 1778.0939 | 5.98 | 1    | 32    | 0.036    | 1    | R_IVSQLLTLMDGLKQR.A + Dimethyl:2H(4) (K); Dimethyl:2H(4) (N-term) |

Proteins matching the same set of peptides:

[IPI00676914](#) Mass: 89423 Score: 248 Queries matched: 13  
 Tax\_Id=10090 Gene\_Symbol=LOC675857 similar to valosin isoform 1

34. [IPI00230395](#) Mass: 38995 Score: 239 Queries matched: 11 emPAI: 0.78

Tax\_Id=10090 Gene\_Symbol=Anxa1 Annexin A1

Check to include this hit in error tolerant search or archive report

| Query                                                    | Observed | Mr(expt)  | Mr(calc)  | ppm  | Miss | Score | Expect   | Rank | Peptide                                                                                      |
|----------------------------------------------------------|----------|-----------|-----------|------|------|-------|----------|------|----------------------------------------------------------------------------------------------|
| <input checked="" type="checkbox"/> <a href="#">503</a>  | 378.2745 | 754.5344  | 754.5316  | 3.68 | 0    | (26)  | 0.18     | 1    | K <sub>2</sub> ALLLAK.G + Dimethyl (K); Dimethyl (N-term)                                    |
| <input checked="" type="checkbox"/> <a href="#">512</a>  | 382.2997 | 762.5848  | 762.5818  | 3.89 | 0    | 40    | 0.0015   | 1    | K <sub>2</sub> ALLLAK.G + Dimethyl:2H(4) (K); Dimethyl:2H(4) (N-term)                        |
| <input checked="" type="checkbox"/> <a href="#">2757</a> | 525.9831 | 1574.9275 | 1574.9181 | 5.92 | 1    | (60)  | 0.00018  | 1    | K <sub>2</sub> GVDEATIIDILTKR.T + Dimethyl:2H(4) (N-term)                                    |
| <input checked="" type="checkbox"/> <a href="#">2799</a> | 533.9851 | 1598.9335 | 1598.9243 | 5.75 | 1    | (56)  | 0.00049  | 1    | K <sub>2</sub> GVDEATIIDILTKR.T + Dimethyl (K); Dimethyl (N-term)                            |
| <input checked="" type="checkbox"/> <a href="#">2810</a> | 536.6685 | 1606.9835 | 1606.9745 | 5.61 | 1    | 65    | 3.3e-005 | 1    | K <sub>2</sub> GVDEATIIDILTKR.T + Dimethyl:2H(4) (K); Dimethyl:2H(4) (N-term)                |
| <input checked="" type="checkbox"/> <a href="#">3055</a> | 566.2870 | 1695.8393 | 1695.8315 | 4.58 | 1    | 66    | 3.4e-005 | 1    | R <sub>2</sub> DLAKDITSDTSGDFR.K + Dimethyl (K); Dimethyl (N-term)                           |
| <input checked="" type="checkbox"/> <a href="#">3075</a> | 568.9707 | 1703.8903 | 1703.8818 | 4.99 | 1    | (49)  | 0.0027   | 1    | R <sub>2</sub> DLAKDITSDTSGDFR.K + Dimethyl:2H(4) (K); Dimethyl:2H(4) (N-term)               |
| <input checked="" type="checkbox"/> <a href="#">3224</a> | 594.3113 | 1779.9122 | 1779.9043 | 4.44 | 0    | (48)  | 0.0028   | 1    | R <sub>2</sub> FLENQEQEYVQAVK.S + Dimethyl (K); Dimethyl (N-term)                            |
| <input checked="" type="checkbox"/> <a href="#">3229</a> | 596.9949 | 1787.9627 | 1787.9545 | 4.59 | 0    | 51    | 0.0019   | 1    | R <sub>2</sub> FLENQEQEYVQAVK.S + Dimethyl:2H(4) (K); Dimethyl:2H(4) (N-term)                |
| <input checked="" type="checkbox"/> <a href="#">3230</a> | 596.9950 | 1787.9632 | 1787.9545 | 4.83 | 0    | (41)  | 0.019    | 1    | R <sub>2</sub> FLENQEQEYVQAVK.S + Dimethyl:2H(4) (K); Dimethyl:2H(4) (N-term)                |
| <input checked="" type="checkbox"/> <a href="#">4527</a> | 705.3893 | 2817.5283 | 2817.5091 | 6.81 | 1    | 48    | 0.0029   | 1    | K <sub>2</sub> SYKGGPGSAVSPYPSFNVSSDVAALHK.A + 2 Dimethyl:2H(4) (K); Dimethyl:2H(4) (N-term) |

Proteins matching the same set of peptides:

[IPI00652811](#) Mass: 40492 Score: 239 Queries matched: 11  
 Tax\_Id=10090 Gene\_Symbol=Anxa1 16 days embryo head cDNA, RIKEN full-length enriched library, clone:C130041B04 product:annexin A1, full insert sequence

35. [IPI00139788](#) Mass: 78841 Score: 232 Queries matched: 12 emPAI: 0.29

Tax\_Id=10090 Gene\_Symbol=Trf Serotransferrin precursor

Check to include this hit in error tolerant search or archive report

| Query                                                    | Observed | Mr(expt)  | Mr(calc)  | ppm  | Miss | Score | Expect   | Rank | Peptide                                                                 |
|----------------------------------------------------------|----------|-----------|-----------|------|------|-------|----------|------|-------------------------------------------------------------------------|
| <input checked="" type="checkbox"/> <a href="#">938</a>  | 490.2842 | 978.5538  | 978.5498  | 4.06 | 0    | 46    | 0.0045   | 1    | K <sub>2</sub> TVLPPDGPR.L + Dimethyl (N-term)                          |
| <input checked="" type="checkbox"/> <a href="#">944</a>  | 327.8769 | 980.6088  | 980.6069  | 1.98 | 0    | 36    | 0.034    | 1    | R <sub>2</sub> IPSHAVVAR.K + Dimethyl:2H(4) (N-term)                    |
| <input checked="" type="checkbox"/> <a href="#">951</a>  | 492.2967 | 982.5789  | 982.5750  | 4.01 | 0    | (31)  | 0.097    | 1    | K <sub>2</sub> TVLPPDGPR.L + Dimethyl:2H(4) (N-term)                    |
| <input checked="" type="checkbox"/> <a href="#">1076</a> | 513.3072 | 1024.5998 | 1024.5957 | 4.02 | 0    | (47)  | 0.0027   | 1    | K <sub>2</sub> GYAVAVVK.A + Dimethyl (K); Dimethyl (N-term)             |
| <input checked="" type="checkbox"/> <a href="#">1077</a> | 513.3075 | 1024.6004 | 1024.5957 | 4.62 | 0    | (56)  | 0.00042  | 1    | K <sub>2</sub> GYAVAVVK.A + Dimethyl (K); Dimethyl (N-term)             |
| <input checked="" type="checkbox"/> <a href="#">1106</a> | 517.3326 | 1032.6506 | 1032.6459 | 4.52 | 0    | 65    | 5.2e-005 | 1    | K <sub>2</sub> GYAVAVVK.A + Dimethyl:2H(4) (K); Dimethyl:2H(4) (N-term) |
| <input checked="" type="checkbox"/> <a href="#">1107</a> | 517.3326 | 1032.6506 | 1032.6459 | 4.52 | 0    | (53)  | 0.00091  | 1    | K <sub>2</sub> GYAVAVVK.A + Dimethyl:2H(4) (K); Dimethyl:2H(4) (N-term) |
| <input checked="" type="checkbox"/> <a href="#">2275</a> | 703.3747 | 1404.7348 | 1404.7249 | 7.09 | 0    | 55    | 0.00062  | 1    | K <sub>2</sub> ASDTSITWNNLK.G + Dimethyl (K); Dimethyl (N-term)         |
| <input checked="" type="checkbox"/> <a href="#">2416</a> | 483.2752 | 1446.8037 | 1446.7983 | 3.74 | 0    | (29)  | 0.24     | 1    | R <sub>2</sub> LYLGHNYVTAIR.N + Dimethyl (N-term)                       |
| <input checked="" type="checkbox"/> <a href="#">2417</a> | 483.2755 | 1446.8047 | 1446.7983 | 4.43 | 0    | (34)  | 0.08     | 1    | R <sub>2</sub> LYLGHNYVTAIR.N + Dimethyl (N-term)                       |
| <input checked="" type="checkbox"/> <a href="#">2437</a> | 484.6173 | 1450.8300 | 1450.8234 | 4.53 | 0    | 42    | 0.013    | 1    | R <sub>2</sub> LYLGHNYVTAIR.N + Dimethyl:2H(4) (N-term)                 |
| <input checked="" type="checkbox"/> <a href="#">2438</a> | 484.6173 | 1450.8302 | 1450.8234 | 4.66 | 0    | (32)  | 0.13     | 1    | R <sub>2</sub> LYLGHNYVTAIR.N + Dimethyl:2H(4) (N-term)                 |

36. [IPI00109073](#) Mass: 50010 Score: 220 Queries matched: 8 emPAI: 0.42

Tax\_Id=10090 Gene\_Symbol=Tubb4 Tubulin beta-4 chain

Check to include this hit in error tolerant search or archive report

| Query                                                    | Observed | Mr(expt)  | Mr(calc)  | ppm  | Miss | Score | Expect   | Rank | Peptide                                                                   |
|----------------------------------------------------------|----------|-----------|-----------|------|------|-------|----------|------|---------------------------------------------------------------------------|
| <a href="#">1218</a>                                     | 534.3191 | 1066.6236 | 1066.6175 | 5.74 | 0    | 28    | 0.26     | 1    | R_YLTVAAVFR.G + Dimethyl (N-term)                                         |
| <a href="#">1466</a>                                     | 586.3401 | 1170.6657 | 1170.6583 | 6.32 | 0    | (40)  | 0.025    | 1    | K_LAVNMVFPFR.L + Dimethyl (N-term)                                        |
| <a href="#">1493</a>                                     | 588.3533 | 1174.6921 | 1174.6834 | 7.38 | 0    | 57    | 0.00044  | 1    | K_LAVNMVFPFR.L + Dimethyl:2H(4) (N-term)                                  |
| <a href="#">2857</a>                                     | 815.4356 | 1628.8567 | 1628.8444 | 7.59 | 0    | (76)  | 5.2e-006 | 1    | R_AVLVLDLEPGTMDSVR.S + Dimethyl (N-term)                                  |
| <a href="#">2877</a>                                     | 817.4486 | 1632.8827 | 1632.8695 | 8.08 | 0    | (62)  | 0.00015  | 1    | R_AVLVLDLEPGTMDSVR.S + Dimethyl:2H(4) (N-term)                            |
| <a href="#">2910</a>                                     | 823.4321 | 1644.8497 | 1644.8393 | 6.34 | 0    | 96    | 4.7e-008 | 1    | R_AVLVLDLEPGTMDSVR.S + Dimethyl (N-term); Oxidation (M)                   |
| <a href="#">2926</a>                                     | 551.6392 | 1651.8958 | 1651.8847 | 6.75 | 0    | 47    | 0.0044   | 1    | R_LHFFMPGFAPLTSR.G + Dimethyl:2H(4) (N-term)                              |
| <input checked="" type="checkbox"/> <a href="#">4269</a> | 609.3290 | 2433.2867 | 2433.2726 | 5.80 | 2    | 28    | 0.4      | 1    | K_IREEFPDRIMNTFSVVPSPK.V + Dimethyl (K); Dimethyl (N-term); Oxidation (M) |

37. [IPI00316491](#) Mass: 15982 Score: 215 Queries matched: 14 emPAI: 2.33

Tax\_Id=10090 Gene\_Symbol=Hbb-b2 Hemoglobin subunit beta-2

Check to include this hit in error tolerant search or archive report

| Query                                                    | Observed | Mr(expt)  | Mr(calc)  | ppm  | Miss | Score | Expect | Rank | Peptide                                                               |
|----------------------------------------------------------|----------|-----------|-----------|------|------|-------|--------|------|-----------------------------------------------------------------------|
| <a href="#">1971</a>                                     | 651.8856 | 1301.7567 | 1301.7496 | 5.48 | 0    | 43    | 0.0096 | 1    | R_LLTVYPWTQR.Y + Dimethyl (N-term)                                    |
| <a href="#">1972</a>                                     | 651.8861 | 1301.7577 | 1301.7496 | 6.25 | 0    | (36)  | 0.047  | 1    | R_LLTVYPWTQR.Y + Dimethyl (N-term)                                    |
| <a href="#">1973</a>                                     | 651.8861 | 1301.7577 | 1301.7496 | 6.25 | 0    | (36)  | 0.046  | 1    | R_LLTVYPWTQR.Y + Dimethyl (N-term)                                    |
| <a href="#">1985</a>                                     | 653.8981 | 1305.7817 | 1305.7747 | 5.37 | 0    | (39)  | 0.024  | 1    | R_LLTVYPWTQR.Y + Dimethyl:2H(4) (N-term)                              |
| <a href="#">1986</a>                                     | 653.8984 | 1305.7823 | 1305.7747 | 5.84 | 0    | (28)  | 0.27   | 1    | R_LLTVYPWTQR.Y + Dimethyl:2H(4) (N-term)                              |
| <a href="#">1987</a>                                     | 653.8986 | 1305.7827 | 1305.7747 | 6.11 | 0    | (36)  | 0.045  | 1    | R_LLTVYPWTQR.Y + Dimethyl:2H(4) (N-term)                              |
| <input checked="" type="checkbox"/> <a href="#">2098</a> | 670.8476 | 1339.6807 | 1339.6732 | 5.63 | 0    | 44    | 0.0049 | 1    | K_VNPDEVGGEALGR.L + Dimethyl (N-term)                                 |
| <input checked="" type="checkbox"/> <a href="#">2108</a> | 672.8596 | 1343.7047 | 1343.6983 | 4.75 | 0    | (41)  | 0.012  | 1    | K_VNPDEVGGEALGR.L + Dimethyl:2H(4) (N-term)                           |
| <a href="#">2552</a>                                     | 498.2946 | 1491.8618 | 1491.8562 | 3.79 | 1    | 51    | 0.0017 | 1    | K_VVAGVATALAHKYH.- + Dimethyl (K); Dimethyl (N-term)                  |
| <a href="#">2579</a>                                     | 500.9779 | 1499.9120 | 1499.9064 | 3.71 | 1    | (48)  | 0.0019 | 1    | K_VVAGVATALAHKYH.- + Dimethyl:2H(4) (K); Dimethyl:2H(4) (N-term)      |
| <input checked="" type="checkbox"/> <a href="#">3856</a> | 688.3359 | 2061.9857 | 2061.9717 | 6.79 | 0    | 42    | 0.0062 | 1    | R_YFDSFGDLSSASAIMGNPK.V + Dimethyl (K); Dimethyl (N-term)             |
| <input checked="" type="checkbox"/> <a href="#">3857</a> | 688.3359 | 2061.9860 | 2061.9717 | 6.91 | 0    | (33)  | 0.055  | 1    | R_YFDSFGDLSSASAIMGNPK.V + Dimethyl (K); Dimethyl (N-term)             |
| <input checked="" type="checkbox"/> <a href="#">3870</a> | 691.0191 | 2070.0355 | 2070.0220 | 6.53 | 0    | (35)  | 0.056  | 1    | R_YFDSFGDLSSASAIMGNPK.V + Dimethyl:2H(4) (K); Dimethyl:2H(4) (N-term) |
| <input checked="" type="checkbox"/> <a href="#">3871</a> | 691.0192 | 2070.0357 | 2070.0220 | 6.65 | 0    | (33)  | 0.098  | 1    | R_YFDSFGDLSSASAIMGNPK.V + Dimethyl:2H(4) (K); Dimethyl:2H(4) (N-term) |

Proteins matching the same set of peptides:

[IPI00828873](#) Mass: 15851 Score: 215 Queries matched: 14

Tax\_Id=10090 Gene\_Symbol=Hbb Beta-2-globin (Fragment)

38. [IPI00117857](#) Mass: 45966 Score: 205 Queries matched: 14 emPAI: 0.73

Tax\_Id=10090 Gene\_Symbol=Sp11-6 Alpha-1-antitrypsin 1-6 precursor

Check to include this hit in error tolerant search or archive report

| Query                                                    | Observed | Mr(expt)  | Mr(calc)  | ppm  | Miss | Score | Expect | Rank | Peptide                                                     |
|----------------------------------------------------------|----------|-----------|-----------|------|------|-------|--------|------|-------------------------------------------------------------|
| <a href="#">1064</a>                                     | 510.2946 | 1018.5746 | 1018.5699 | 4.58 | 0    | 38    | 0.028  | 1    | K_VINDFVEK.G + Dimethyl (K); Dimethyl (N-term)              |
| <a href="#">1331</a>                                     | 558.8291 | 1115.6437 | 1115.6373 | 5.80 | 0    | 44    | 0.0083 | 1    | K_TLMSPLGITR.I + Dimethyl (N-term)                          |
| <a href="#">1345</a>                                     | 560.8419 | 1119.6692 | 1119.6624 | 6.07 | 0    | (39)  | 0.025  | 1    | K_TLMSPLGITR.I + Dimethyl:2H(4) (N-term)                    |
| <a href="#">1368</a>                                     | 566.8261 | 1131.6377 | 1131.6322 | 4.90 | 0    | (37)  | 0.043  | 1    | K_TLMSPLGITR.I + Dimethyl (N-term); Oxidation (M)           |
| <a href="#">1379</a>                                     | 568.8386 | 1135.6626 | 1135.6573 | 4.65 | 0    | (40)  | 0.018  | 1    | K_TLMSPLGITR.I + Dimethyl:2H(4) (N-term); Oxidation (M)     |
| <input checked="" type="checkbox"/> <a href="#">1547</a> | 594.3629 | 1186.7113 | 1186.7049 | 5.39 | 0    | 35    | 0.052  | 1    | R_LSIGEYNLK.T + Dimethyl:2H(4) (K); Dimethyl:2H(4) (N-term) |

|                      |          |           |           |      |   |      |          |   |                                                                    |
|----------------------|----------|-----------|-----------|------|---|------|----------|---|--------------------------------------------------------------------|
| <a href="#">2635</a> | 506.9575 | 1517.8507 | 1517.8453 | 3.55 | 1 | 36   | 0.058    | 1 | K_VINDFVEKGTQGK.I + 2 Dimethyl (K); Dimethyl (N-term)              |
| <a href="#">2661</a> | 510.9827 | 1529.9264 | 1529.9207 | 3.70 | 1 | (25) | 0.41     | 1 | K_VINDFVEKGTQGK.I + 2 Dimethyl:2H(4) (K); Dimethyl:2H(4) (N-term)  |
| <a href="#">2992</a> | 558.9998 | 1673.9774 | 1673.9716 | 3.49 | 2 | (33) | 0.093    | 1 | K_KVINDFVEKGTQGK.I + 3 Dimethyl (K); Dimethyl (N-term)             |
| <a href="#">3035</a> | 564.3665 | 1690.0777 | 1690.0721 | 3.36 | 2 | 34   | 0.017    | 1 | K_KVINDFVEKGTQGK.I + 3 Dimethyl:2H(4) (K); Dimethyl:2H(4) (N-term) |
| <a href="#">3849</a> | 687.0324 | 2058.0754 | 2058.0633 | 5.88 | 0 | (46) | 0.0057   | 1 | R_IFNNGADLSGITEENAPLK.L + Dimethyl (K); Dimethyl (N-term)          |
| <a href="#">3850</a> | 687.0330 | 2058.0772 | 2058.0633 | 6.77 | 0 | 62   | 0.00017  | 1 | R_IFNNGADLSGITEENAPLK.L + Dimethyl (K); Dimethyl (N-term)          |
| <a href="#">4537</a> | 713.3945 | 2849.5487 | 2849.5287 | 7.04 | 1 | 62   | 9.7e-005 | 2 | R_IFNNGADLSGITEENAPLKLSQAVHK.A + 2 Dimethyl (K); Dimethyl (N-term) |
| <a href="#">4538</a> | 713.3948 | 2849.5500 | 2849.5287 | 7.49 | 1 | (50) | 0.0018   | 3 | R_IFNNGADLSGITEENAPLKLSQAVHK.A + 2 Dimethyl (K); Dimethyl (N-term) |

Proteins matching the same set of peptides:

[IPI00123920](#) Mass: 45996 Score: 205 Queries matched: 14  
Tax\_Id=10090 Gene\_Symbol=Serpinalc Alpha-1-antitrypsin 1-3 precursor  
[IPI00406302](#) Mass: 46145 Score: 205 Queries matched: 14  
Tax\_Id=10090 Gene\_Symbol=Serpinala Alpha-1-antitrypsin 1-1 precursor

39. [IPI00318614](#) Mass: 51330 Score: 198 Queries matched: 4 emPAI: 0.10  
Tax\_Id=10090 Gene\_Symbol=Idh2 Isocitrate dehydrogenase [NADP], mitochondrial precursor

Check to include this hit in error tolerant search or archive report

| Query                                                    | Observed | Mr(expt)  | Mr(calc)  | ppm  | Miss | Score | Expect   | Rank | Peptide                                     |
|----------------------------------------------------------|----------|-----------|-----------|------|------|-------|----------|------|---------------------------------------------|
| <input checked="" type="checkbox"/> <a href="#">2212</a> | 461.9135 | 1382.7187 | 1382.7154 | 2.42 | 0    | (64)  | 5.4e-005 | 1    | K_TIEAEAAHGTVTR.H + Dimethyl (N-term)       |
| <input checked="" type="checkbox"/> <a href="#">2213</a> | 461.9139 | 1382.7197 | 1382.7154 | 3.14 | 0    | 86    | 3.7e-007 | 1    | K_TIEAEAAHGTVTR.H + Dimethyl (N-term)       |
| <input checked="" type="checkbox"/> <a href="#">2219</a> | 463.2553 | 1386.7442 | 1386.7405 | 2.67 | 0    | (69)  | 2.6e-005 | 1    | K_TIEAEAAHGTVTR.H + Dimethyl:2H(4) (N-term) |
| <input checked="" type="checkbox"/> <a href="#">2220</a> | 463.2555 | 1386.7447 | 1386.7405 | 3.05 | 0    | (76)  | 4.6e-006 | 1    | K_TIEAEAAHGTVTR.H + Dimethyl:2H(4) (N-term) |

Proteins matching the same set of peptides:

[IPI00875110](#) Mass: 52994 Score: 198 Queries matched: 4  
Tax\_Id=10090 Gene\_Symbol=Idh2 52 kDa protein

40. [IPI00323816](#) Mass: 53147 Score: 193 Queries matched: 6 emPAI: 0.33  
Tax\_Id=10090 Gene\_Symbol=Selenbp2 Selenium-binding protein 2

Check to include this hit in error tolerant search or archive report

| Query                                                    | Observed | Mr(expt)  | Mr(calc)  | ppm  | Miss | Score | Expect   | Rank | Peptide                                                      |
|----------------------------------------------------------|----------|-----------|-----------|------|------|-------|----------|------|--------------------------------------------------------------|
| <input checked="" type="checkbox"/> <a href="#">1269</a> | 548.8611 | 1095.7077 | 1095.7016 | 5.63 | 0    | 59    | 0.00011  | 1    | K_LILPGLISSR.I + Dimethyl (N-term)                           |
| <input checked="" type="checkbox"/> <a href="#">1280</a> | 550.8738 | 1099.7331 | 1099.7267 | 5.87 | 0    | (53)  | 0.00033  | 1    | K_LILPGLISSR.I + Dimethyl:2H(4) (N-term)                     |
| <input checked="" type="checkbox"/> <a href="#">1398</a> | 572.3370 | 1142.6594 | 1142.6546 | 4.15 | 0    | (51)  | 0.0014   | 1    | K_VIEASEIQAK.C + Dimethyl (K); Dimethyl (N-term)             |
| <input checked="" type="checkbox"/> <a href="#">1418</a> | 576.3619 | 1150.7093 | 1150.7049 | 3.86 | 0    | 60    | 0.00016  | 1    | K_VIEASEIQAK.C + Dimethyl:2H(4) (K); Dimethyl:2H(4) (N-term) |
| <input checked="" type="checkbox"/> <a href="#">1869</a> | 631.3461 | 1260.6777 | 1260.6714 | 5.01 | 0    | 67    | 3.5e-005 | 1    | R_IYVVDVGSEPR.A + Dimethyl (N-term)                          |
| <input checked="" type="checkbox"/> <a href="#">1876</a> | 633.3592 | 1264.7038 | 1264.6965 | 5.78 | 0    | (61)  | 0.00013  | 1    | R_IYVVDVGSEPR.A + Dimethyl:2H(4) (N-term)                    |

Proteins matching the same set of peptides:

[IPI00623845](#) Mass: 53051 Score: 193 Queries matched: 6  
Tax\_Id=10090 Gene\_Symbol=LOC100044204;Selenbp1 Selenium-binding protein 1

41. [IPI00323592](#) Mass: 36045 Score: 188 Queries matched: 8 emPAI: 0.62

Tax\_Id=10090 Gene\_Symbol=Mdh2 Malate dehydrogenase, mitochondrial precursor

Check to include this hit in error tolerant search or archive report

| Query                                                    | Observed | Mr(expt)  | Mr(calc)  | ppm  | Miss | Score | Expect   | Rank | Peptide                                                      |
|----------------------------------------------------------|----------|-----------|-----------|------|------|-------|----------|------|--------------------------------------------------------------|
| <input checked="" type="checkbox"/> <a href="#">799</a>  | 460.2621 | 918.5097  | 918.5062  | 3.77 | 0    | 46    | 0.0035   | 1    | K_ITPFEEK.M + Dimethyl (K); Dimethyl (N-term)                |
| <input checked="" type="checkbox"/> <a href="#">1197</a> | 528.8331 | 1055.6516 | 1055.6467 | 4.67 | 0    | 40    | 0.015    | 1    | R_ANTFVAELK.G + Dimethyl:2H(4) (K); Dimethyl:2H(4) (N-term)  |
| <input checked="" type="checkbox"/> <a href="#">1365</a> | 565.3286 | 1128.6427 | 1128.6390 | 3.23 | 0    | (35)  | 0.061    | 1    | R_IQEAGTEVVK.A + Dimethyl (K); Dimethyl (N-term)             |
| <input checked="" type="checkbox"/> <a href="#">1384</a> | 569.3539 | 1136.6932 | 1136.6893 | 3.48 | 0    | 51    | 0.0012   | 1    | R_IQEAGTEVVK.A + Dimethyl:2H(4) (K); Dimethyl:2H(4) (N-term) |
| <input checked="" type="checkbox"/> <a href="#">1462</a> | 585.8469 | 1169.6793 | 1169.6729 | 5.44 | 0    | 68    | 2.7e-005 | 1    | K_MIAEAIPELK.A + Dimethyl (K); Dimethyl (N-term)             |
| <input checked="" type="checkbox"/> <a href="#">1516</a> | 589.8719 | 1177.7293 | 1177.7232 | 5.25 | 0    | (64)  | 5.2e-005 | 1    | K_MIAEAIPELK.A + Dimethyl:2H(4) (K); Dimethyl:2H(4) (N-term) |
| <input checked="" type="checkbox"/> <a href="#">4262</a> | 607.0845 | 2424.3087 | 2424.2951 | 5.63 | 0    | 49    | 0.0033   | 1    | R_LTLYDIAHTPGVAADLSHIETR.A + Dimethyl:2H(4) (N-term)         |
| <input checked="" type="checkbox"/> <a href="#">4263</a> | 607.0847 | 2424.3095 | 2424.2951 | 5.96 | 0    | (48)  | 0.0037   | 1    | R_LTLYDIAHTPGVAADLSHIETR.A + Dimethyl:2H(4) (N-term)         |

42. [IPI00127560](#) Mass: 15880 Score: 188 Queries matched: 7 emPAI: 1.13

Tax\_Id=10090 Gene\_Symbol=Ttr Transthyretin precursor

Check to include this hit in error tolerant search or archive report

| Query                                                    | Observed | Mr(expt)  | Mr(calc)  | ppm  | Miss | Score | Expect   | Rank | Peptide                                                           |
|----------------------------------------------------------|----------|-----------|-----------|------|------|-------|----------|------|-------------------------------------------------------------------|
| <input checked="" type="checkbox"/> <a href="#">1004</a> | 499.7994 | 997.5843  | 997.5808  | 3.48 | 0    | (57)  | 0.00032  | 1    | R_GSPAVDVAVK.V + Dimethyl (K); Dimethyl (N-term)                  |
| <input checked="" type="checkbox"/> <a href="#">1005</a> | 499.7995 | 997.5845  | 997.5808  | 3.72 | 0    | (57)  | 0.00031  | 1    | R_GSPAVDVAVK.V + Dimethyl (K); Dimethyl (N-term)                  |
| <input checked="" type="checkbox"/> <a href="#">1036</a> | 503.8245 | 1005.6344 | 1005.6310 | 3.39 | 0    | 57    | 0.00027  | 1    | R_GSPAVDVAVK.V + Dimethyl:2H(4) (K); Dimethyl:2H(4) (N-term)      |
| <input checked="" type="checkbox"/> <a href="#">1037</a> | 503.8248 | 1005.6351 | 1005.6310 | 4.05 | 0    | (46)  | 0.0036   | 1    | R_GSPAVDVAVK.V + Dimethyl:2H(4) (K); Dimethyl:2H(4) (N-term)      |
| <input checked="" type="checkbox"/> <a href="#">2411</a> | 723.8761 | 1445.7376 | 1445.7278 | 6.79 | 0    | 73    | 6.8e-006 | 1    | K_TSEGSWEFASGK.T + Dimethyl:2H(4) (K); Dimethyl:2H(4) (N-term)    |
| <input checked="" type="checkbox"/> <a href="#">2900</a> | 548.6112 | 1642.8118 | 1642.8050 | 4.14 | 0    | 35    | 0.035    | 1    | K_TAESGELHGLTTDEK.F + Dimethyl (K); Dimethyl (N-term)             |
| <input checked="" type="checkbox"/> <a href="#">2922</a> | 551.2947 | 1650.8622 | 1650.8552 | 4.24 | 0    | (34)  | 0.086    | 1    | K_TAESGELHGLTTDEK.F + Dimethyl:2H(4) (K); Dimethyl:2H(4) (N-term) |

43. [IPI00555069](#) Mass: 44921 Score: 184 Queries matched: 7 emPAI: 0.40

Tax\_Id=10090 Gene\_Symbol=Pgk1 Phosphoglycerate kinase 1

Check to include this hit in error tolerant search or archive report

| Query                                                    | Observed | Mr(expt)  | Mr(calc)  | ppm  | Miss | Score | Expect   | Rank | Peptide                                                              |
|----------------------------------------------------------|----------|-----------|-----------|------|------|-------|----------|------|----------------------------------------------------------------------|
| <input checked="" type="checkbox"/> <a href="#">1315</a> | 556.3246 | 1110.6347 | 1110.6285 | 5.62 | 0    | (43)  | 0.0069   | 1    | K_VLPGVDALSNV.- + Dimethyl (N-term)                                  |
| <input checked="" type="checkbox"/> <a href="#">1329</a> | 558.3374 | 1114.6603 | 1114.6536 | 5.97 | 0    | 54    | 0.00073  | 1    | K_VLPGVDALSNV.- + Dimethyl:2H(4) (N-term)                            |
| <input checked="" type="checkbox"/> <a href="#">2970</a> | 554.9485 | 1661.8237 | 1661.8162 | 4.54 | 0    | 72    | 8.6e-006 | 1    | K_LGDVYVNDAPFGTAHR.A + Dimethyl (N-term)                             |
| <input checked="" type="checkbox"/> <a href="#">2978</a> | 556.2905 | 1665.8497 | 1665.8413 | 5.06 | 0    | (57)  | 0.00031  | 1    | K_LGDVYVNDAPFGTAHR.A + Dimethyl:2H(4) (N-term)                       |
| <input checked="" type="checkbox"/> <a href="#">2979</a> | 556.2906 | 1665.8501 | 1665.8413 | 5.29 | 0    | (55)  | 0.00059  | 1    | K_LGDVYVNDAPFGTAHR.A + Dimethyl:2H(4) (N-term)                       |
| <input checked="" type="checkbox"/> <a href="#">3335</a> | 609.0283 | 1824.0631 | 1824.0509 | 6.72 | 0    | 30    | 0.15     | 1    | K_ALESPERPFLLAILGGAK.V + Dimethyl (K); Dimethyl (N-term)             |
| <input checked="" type="checkbox"/> <a href="#">3355</a> | 611.7116 | 1832.1130 | 1832.1011 | 6.49 | 0    | (26)  | 0.23     | 1    | K_ALESPERPFLLAILGGAK.V + Dimethyl:2H(4) (K); Dimethyl:2H(4) (N-term) |

44. [IPI00132762](#) Mass: 80501 Score: 181 Queries matched: 2 emPAI: 0.07

Tax\_Id=10090 Gene\_Symbol=Trap1 Heat shock protein 75 kDa, mitochondrial precursor

Check to include this hit in error tolerant search or archive report

| Query | Observed | Mr(expt) | Mr(calc) | ppm | Miss | Score | Expect | Rank | Peptide |
|-------|----------|----------|----------|-----|------|-------|--------|------|---------|
|-------|----------|----------|----------|-----|------|-------|--------|------|---------|



[2692](#) 771.4176 1540.8207 1540.8097 7.17 0 (104) 8.9e-009 1 R\_GVVDSEDIPLNLSR.E + Dimethyl (N-term)  
[2699](#) 773.4298 1544.8451 1544.8348 6.65 0 113 1.1e-009 1 R\_GVVDSEDIPLNLSR.E + Dimethyl:2H(4) (N-term)

45. [IPI00128249](#) Mass: 38100 Score: 177 Queries matched: 4 emPAI: 0.14

Tax\_Id=10090 Gene\_Symbol=Ahsg Alpha-2-HS-glycoprotein precursor

Check to include this hit in error tolerant search or archive report

| Query                                                    | Observed | Mr(expt)  | Mr(calc)  | ppm  | Miss | Score | Expect   | Rank | Peptide                                                                 |
|----------------------------------------------------------|----------|-----------|-----------|------|------|-------|----------|------|-------------------------------------------------------------------------|
| <input checked="" type="checkbox"/> <a href="#">4004</a> | 732.0468 | 2193.1187 | 2193.1066 | 5.54 | 0    | (58)  | 0.0003   | 1    | R_HAFSPVASVESASGETLHSPK.V + Dimethyl (K); Dimethyl (N-term)             |
| <input checked="" type="checkbox"/> <a href="#">4005</a> | 732.0469 | 2193.1190 | 2193.1066 | 5.65 | 0    | (61)  | 0.00016  | 1    | R_HAFSPVASVESASGETLHSPK.V + Dimethyl (K); Dimethyl (N-term)             |
| <input checked="" type="checkbox"/> <a href="#">4020</a> | 734.7302 | 2201.1687 | 2201.1568 | 5.41 | 0    | (68)  | 4.1e-005 | 1    | R_HAFSPVASVESASGETLHSPK.V + Dimethyl:2H(4) (K); Dimethyl:2H(4) (N-term) |
| <input checked="" type="checkbox"/> <a href="#">4021</a> | 734.7303 | 2201.1690 | 2201.1568 | 5.55 | 0    | 73    | 1.1e-005 | 1    | R_HAFSPVASVESASGETLHSPK.V + Dimethyl:2H(4) (K); Dimethyl:2H(4) (N-term) |

46. [IPI00126248](#) Mass: 121630 Score: 174 Queries matched: 7 emPAI: 0.11

Tax\_Id=10090 Gene\_Symbol=Acly Adult male testis cDNA, RIKEN full-length enriched library, clone:4922505F07 product:ATP citrate lyase, full insert sequence

Check to include this hit in error tolerant search or archive report

| Query                                                    | Observed | Mr(expt)  | Mr(calc)  | ppm  | Miss | Score | Expect   | Rank | Peptide                                                               |
|----------------------------------------------------------|----------|-----------|-----------|------|------|-------|----------|------|-----------------------------------------------------------------------|
| <input checked="" type="checkbox"/> <a href="#">474</a>  | 366.7509 | 731.4872  | 731.4843  | 3.88 | 0    | 33    | 0.05     | 1    | R_ELGLIR.K + Dimethyl:2H(4) (N-term)                                  |
| <input checked="" type="checkbox"/> <a href="#">2637</a> | 760.3841 | 1518.7537 | 1518.7460 | 5.08 | 0    | 91    | 9.7e-008 | 1    | R_SGGMSELNLIISR.T + Dimethyl (N-term)                                 |
| <input checked="" type="checkbox"/> <a href="#">2638</a> | 760.3842 | 1518.7538 | 1518.7460 | 5.10 | 0    | (73)  | 6.3e-006 | 1    | R_SGGMSELNLIISR.T + Dimethyl (N-term)                                 |
| <input checked="" type="checkbox"/> <a href="#">2800</a> | 800.4902 | 1598.9659 | 1598.9545 | 7.15 | 0    | 34    | 0.056    | 1    | R_TIAIIAEGIPEALTR.K + Dimethyl:2H(4) (N-term)                         |
| <input checked="" type="checkbox"/> <a href="#">3463</a> | 470.2560 | 1876.9948 | 1876.9894 | 2.89 | 2    | (34)  | 0.11     | 1    | R_TASFSESRADAVAPAKK.A + 2 Dimethyl (K); Dimethyl (N-term)             |
| <input checked="" type="checkbox"/> <a href="#">3523</a> | 473.2749 | 1889.0705 | 1889.0647 | 3.05 | 2    | (37)  | 0.039    | 1    | R_TASFSESRADAVAPAKK.A + 2 Dimethyl:2H(4) (K); Dimethyl:2H(4) (N-term) |
| <input checked="" type="checkbox"/> <a href="#">3524</a> | 473.2750 | 1889.0710 | 1889.0647 | 3.31 | 2    | 48    | 0.0037   | 1    | R_TASFSESRADAVAPAKK.A + 2 Dimethyl:2H(4) (K); Dimethyl:2H(4) (N-term) |

Proteins matching the same set of peptides:

[IPI00762047](#) Mass: 120564 Score: 174 Queries matched: 7

Tax\_Id=10090 Gene\_Symbol=Acly ATP-citrate synthase

47. [IPI00830223](#) Mass: 28383 Score: 173 Queries matched: 8 emPAI: 0.84

Tax\_Id=10090 Gene\_Symbol=Tpm1 28 kDa protein

Check to include this hit in error tolerant search or archive report

| Query                                                    | Observed | Mr(expt)  | Mr(calc)  | ppm  | Miss | Score | Expect   | Rank | Peptide                                                               |
|----------------------------------------------------------|----------|-----------|-----------|------|------|-------|----------|------|-----------------------------------------------------------------------|
| <input checked="" type="checkbox"/> <a href="#">2179</a> | 687.8311 | 1373.6477 | 1373.6422 | 3.99 | 0    | 64    | 1.9e-005 | 1    | R_SLQEQADAAEER.A + Dimethyl (N-term)                                  |
| <input checked="" type="checkbox"/> <a href="#">2193</a> | 689.8439 | 1377.6733 | 1377.6674 | 4.32 | 0    | (63)  | 4.3e-005 | 1    | R_SLQEQADAAEER.A + Dimethyl:2H(4) (N-term)                            |
| <input checked="" type="checkbox"/> <a href="#">3173</a> | 585.9825 | 1754.9257 | 1754.9162 | 5.41 | 1    | (38)  | 0.036    | 1    | R_IQLVEEELDRAQER.L + Dimethyl (N-term)                                |
| <input checked="" type="checkbox"/> <a href="#">3186</a> | 587.3243 | 1758.9512 | 1758.9413 | 5.60 | 1    | 56    | 0.00069  | 1    | R_IQLVEEELDRAQER.L + Dimethyl:2H(4) (N-term)                          |
| <input checked="" type="checkbox"/> <a href="#">3562</a> | 638.0165 | 1911.0277 | 1911.0173 | 5.44 | 2    | 31    | 0.21     | 1    | R_RIQLVEEELDRAQER.L + Dimethyl (N-term)                               |
| <input checked="" type="checkbox"/> <a href="#">4117</a> | 565.3049 | 2257.1904 | 2257.1801 | 4.56 | 2    | (34)  | 0.087    | 1    | R_LATALQKLEEAKEADESER.G + Dimethyl (K); Dimethyl (N-term)             |
| <input checked="" type="checkbox"/> <a href="#">4125</a> | 567.3176 | 2265.2414 | 2265.2303 | 4.90 | 2    | (32)  | 0.14     | 1    | R_LATALQKLEEAKEADESER.G + Dimethyl:2H(4) (K); Dimethyl:2H(4) (N-term) |
| <input checked="" type="checkbox"/> <a href="#">4126</a> | 567.3177 | 2265.2417 | 2265.2303 | 5.04 | 2    | 47    | 0.0048   | 1    | R_LATALQKLEEAKEADESER.G + Dimethyl:2H(4) (K); Dimethyl:2H(4) (N-term) |

Proteins matching the same set of peptides:

[IPI00830333](#) Mass: 28959 Score: 173 Queries matched: 8  
Tax\_Id=10090 Gene\_Symbol=Tpm1 29 kDa protein  
[IPI00831330](#) Mass: 28597 Score: 173 Queries matched: 8  
Tax\_Id=10090 Gene\_Symbol=Tpm1 29 kDa protein  
[IPI00831423](#) Mass: 28651 Score: 173 Queries matched: 8  
Tax\_Id=10090 Gene\_Symbol=Tpm1 29 kDa protein  
[IPI00831431](#) Mass: 28466 Score: 173 Queries matched: 8  
Tax\_Id=10090 Gene\_Symbol=Tpm1 28 kDa protein  
[IPI00831626](#) Mass: 28679 Score: 173 Queries matched: 8  
Tax\_Id=10090 Gene\_Symbol=Tpm1 29 kDa protein

---

48. [IPI00648086](#) Mass: 15200 Score: 172 Queries matched: 8 emPAI: 2.53  
Tax\_Id=10090 Gene\_Symbol=Laspl LIM and SH3 protein 1

Check to include this hit in error tolerant search or archive report

| Query                                                    | Observed | Mr(expt)  | Mr(calc)  | ppm  | Miss | Score | Expect   | Rank | Peptide                                                             |
|----------------------------------------------------------|----------|-----------|-----------|------|------|-------|----------|------|---------------------------------------------------------------------|
| <input checked="" type="checkbox"/> <a href="#">2412</a> | 723.8871 | 1445.7597 | 1445.7515 | 5.72 | 0    | (58)  | 0.00034  | 1    | K_GFSVVADTPELQR.I + Dimethyl (N-term)                               |
| <input checked="" type="checkbox"/> <a href="#">2430</a> | 725.9003 | 1449.7860 | 1449.7766 | 6.50 | 0    | 66    | 5.5e-005 | 1    | K_GFSVVADTPELQR.I + Dimethyl:2H(4) (N-term)                         |
| <input checked="" type="checkbox"/> <a href="#">2528</a> | 495.9102 | 1484.7087 | 1484.7042 | 3.07 | 1    | (39)  | 0.0087   | 1    | R_MGPGSGEGVEPERR.E + Dimethyl (N-term)                              |
| <input checked="" type="checkbox"/> <a href="#">2540</a> | 497.2518 | 1488.7337 | 1488.7293 | 2.98 | 1    | (32)  | 0.074    | 1    | R_MGPGSGEGVEPERR.E + Dimethyl:2H(4) (N-term)                        |
| <input checked="" type="checkbox"/> <a href="#">2569</a> | 500.6250 | 1498.8531 | 1498.8467 | 4.25 | 1    | 52    | 0.0011   | 1    | R_LKQQSELQSQVR.Y + Dimethyl (K); Dimethyl (N-term)                  |
| <input checked="" type="checkbox"/> <a href="#">2590</a> | 502.5834 | 1504.7283 | 1504.7242 | 2.72 | 1    | 48    | 0.0013   | 1    | R_MGPGSGEGVEPERR.E + Dimethyl:2H(4) (N-term); Oxidation (M)         |
| <input checked="" type="checkbox"/> <a href="#">2600</a> | 503.3082 | 1506.9028 | 1506.8969 | 3.86 | 1    | (45)  | 0.0052   | 1    | R_LKQQSELQSQVR.Y + Dimethyl:2H(4) (K); Dimethyl:2H(4) (N-term)      |
| <input checked="" type="checkbox"/> <a href="#">3914</a> | 527.0399 | 2104.1306 | 2104.1230 | 3.60 | 1    | 31    | 0.18     | 1    | K_TQDQISNIKYHEEFK.S + 2 Dimethyl:2H(4) (K); Dimethyl:2H(4) (N-term) |

Proteins matching the same set of peptides:

[IPI00649913](#) Mass: 21332 Score: 172 Queries matched: 8  
Tax\_Id=10090 Gene\_Symbol=Laspl LIM and SH3 protein 1  
[IPI00125091](#) Mass: 30374 Score: 172 Queries matched: 8  
Tax\_Id=10090 Gene\_Symbol=Laspl LIM and SH3 domain protein 1

---

49. [IPI00121209](#) Mass: 30569 Score: 168 Queries matched: 6 emPAI: 0.63  
Tax\_Id=10090 Gene\_Symbol=Apoal Apolipoprotein A-I precursor

Check to include this hit in error tolerant search or archive report

| Query                                                    | Observed | Mr(expt)  | Mr(calc)  | ppm  | Miss | Score | Expect   | Rank | Peptide                                     |
|----------------------------------------------------------|----------|-----------|-----------|------|------|-------|----------|------|---------------------------------------------|
| <input checked="" type="checkbox"/> <a href="#">2116</a> | 449.5752 | 1345.7037 | 1345.6990 | 3.52 | 1    | 40    | 0.016    | 1    | R_LSPVAEEFRDR.M + Dimethyl (N-term)         |
| <input checked="" type="checkbox"/> <a href="#">2124</a> | 450.9172 | 1349.7297 | 1349.7241 | 4.16 | 1    | (40)  | 0.024    | 1    | R_LSPVAEEFRDR.M + Dimethyl:2H(4) (N-term)   |
| <input checked="" type="checkbox"/> <a href="#">2138</a> | 453.8945 | 1358.6617 | 1358.6579 | 2.85 | 0    | 51    | 0.00075  | 1    | K_SNPRTLNEYHTR.A + Dimethyl (N-term)        |
| <input checked="" type="checkbox"/> <a href="#">2146</a> | 455.2362 | 1362.6867 | 1362.6830 | 2.73 | 0    | (47)  | 0.0023   | 1    | K_SNPRTLNEYHTR.A + Dimethyl:2H(4) (N-term)  |
| <input checked="" type="checkbox"/> <a href="#">2153</a> | 684.8821 | 1367.7497 | 1367.7408 | 6.49 | 0    | 71    | 1.6e-005 | 1    | K_VAPLGAELQESAR.Q + Dimethyl (N-term)       |
| <input checked="" type="checkbox"/> <a href="#">2170</a> | 686.8951 | 1371.7756 | 1371.7660 | 7.03 | 0    | (69)  | 2.6e-005 | 1    | K_VAPLGAELQESAR.Q + Dimethyl:2H(4) (N-term) |

---

50. [IPI00555059](#) Mass: 24969 Score: 168 Queries matched: 10 emPAI: 0.81  
Tax\_Id=10090 Gene\_Symbol=Prdx6 Peroxiredoxin-6

Check to include this hit in error tolerant search or archive report

| Query                                                    | Observed | Mr(expt)  | Mr(calc)  | ppm  | Miss | Score | Expect  | Rank | Peptide                                                                   |
|----------------------------------------------------------|----------|-----------|-----------|------|------|-------|---------|------|---------------------------------------------------------------------------|
| <input checked="" type="checkbox"/> <a href="#">823</a>  | 467.7556 | 933.4967  | 933.4920  | 5.12 | 0    | 31    | 0.09    | 1    | R_NFDEILR.V + Dimethyl (N-term)                                           |
| <input checked="" type="checkbox"/> <a href="#">997</a>  | 332.5553 | 994.6442  | 994.6415  | 2.67 | 1    | 29    | 0.14    | 1    | K_LAPEFAKR.N + Dimethyl:2H(4) (K); Dimethyl:2H(4) (N-term)                |
| <input checked="" type="checkbox"/> <a href="#">1670</a> | 610.3591 | 1218.7037 | 1218.6972 | 5.35 | 0    | (25)  | 0.6     | 1    | K_LSILYPATTGR.N + Dimethyl (N-term)                                       |
| <input checked="" type="checkbox"/> <a href="#">1696</a> | 612.3718 | 1222.7291 | 1222.7223 | 5.55 | 0    | 33    | 0.082   | 1    | K_LSILYPATTGR.N + Dimethyl:2H(4) (N-term)                                 |
| <input checked="" type="checkbox"/> <a href="#">1780</a> | 411.9267 | 1232.7582 | 1232.7533 | 3.97 | 1    | (53)  | 0.00076 | 1    | R_VVFIFGPDKK.L + 2 Dimethyl (K); Dimethyl (N-term)                        |
| <input checked="" type="checkbox"/> <a href="#">1832</a> | 415.9517 | 1244.8332 | 1244.8286 | 3.63 | 1    | 53    | 0.00021 | 1    | R_VVFIFGPDKK.L + 2 Dimethyl:2H(4) (K); Dimethyl:2H(4) (N-term)            |
| <input checked="" type="checkbox"/> <a href="#">4097</a> | 746.7682 | 2237.2827 | 2237.2671 | 6.97 | 0    | (47)  | 0.0027  | 1    | R_VVDSLQLTGTKPVATPVVDWK.K + 2 Dimethyl (K); Dimethyl (N-term)             |
| <input checked="" type="checkbox"/> <a href="#">4098</a> | 746.7683 | 2237.2831 | 2237.2671 | 7.14 | 0    | 54    | 0.00055 | 1    | R_VVDSLQLTGTKPVATPVVDWK.K + 2 Dimethyl (K); Dimethyl (N-term)             |
| <input checked="" type="checkbox"/> <a href="#">4109</a> | 750.7935 | 2249.3587 | 2249.3425 | 7.22 | 0    | (43)  | 0.0024  | 1    | R_VVDSLQLTGTKPVATPVVDWK.K + 2 Dimethyl:2H(4) (K); Dimethyl:2H(4) (N-term) |
| <input checked="" type="checkbox"/> <a href="#">4110</a> | 750.7936 | 2249.3589 | 2249.3425 | 7.30 | 0    | (39)  | 0.0053  | 1    | R_VVDSLQLTGTKPVATPVVDWK.K + 2 Dimethyl:2H(4) (K); Dimethyl:2H(4) (N-term) |

Proteins matching the same set of peptides:

[IPI00754071](#) Mass: 22594 Score: 168 Queries matched: 10  
Tax\_Id=10090 Gene\_Symbol=Prdx6 22 kDa protein  
[IPI00758024](#) Mass: 24925 Score: 168 Queries matched: 10  
Tax\_Id=10090 Gene\_Symbol=Prdx6 Peroxiredoxin 6

51. [IPI00336324](#) Mass: 36659 Score: 167 Queries matched: 9 emPAI: 0.61  
Tax\_Id=10090 Gene\_Symbol=Mdh1 Malate dehydrogenase, cytoplasmic

Check to include this hit in error tolerant search or archive report

| Query                                                    | Observed | Mr(expt)  | Mr(calc)  | ppm  | Miss | Score | Expect  | Rank | Peptide                                                            |
|----------------------------------------------------------|----------|-----------|-----------|------|------|-------|---------|------|--------------------------------------------------------------------|
| <input checked="" type="checkbox"/> <a href="#">914</a>  | 487.2834 | 972.5523  | 972.5492  | 3.21 | 0    | 48    | 0.0031  | 1    | K_LGVTADDVK.N + Dimethyl (K); Dimethyl (N-term)                    |
| <input checked="" type="checkbox"/> <a href="#">943</a>  | 491.3085 | 980.6025  | 980.5994  | 3.18 | 0    | (46)  | 0.0038  | 1    | K_LGVTADDVK.N + Dimethyl:2H(4) (K); Dimethyl:2H(4) (N-term)        |
| <input checked="" type="checkbox"/> <a href="#">2315</a> | 711.3796 | 1420.7447 | 1420.7351 | 6.80 | 0    | 58    | 0.00034 | 1    | K_FVEGLPINDFSR.E + Dimethyl (N-term)                               |
| <input checked="" type="checkbox"/> <a href="#">2332</a> | 713.3923 | 1424.7700 | 1424.7602 | 6.89 | 0    | (57)  | 0.00041 | 1    | K_FVEGLPINDFSR.E + Dimethyl:2H(4) (N-term)                         |
| <input checked="" type="checkbox"/> <a href="#">3514</a> | 943.9756 | 1885.9367 | 1885.9196 | 9.07 | 1    | (42)  | 0.012   | 1    | K_ELTEEKETAFEFLLSA.- + Dimethyl (K); Dimethyl (N-term)             |
| <input checked="" type="checkbox"/> <a href="#">3536</a> | 948.0010 | 1893.9875 | 1893.9699 | 9.32 | 1    | (35)  | 0.067   | 1    | K_ELTEEKETAFEFLLSA.- + Dimethyl:2H(4) (K); Dimethyl:2H(4) (N-term) |
| <input checked="" type="checkbox"/> <a href="#">3537</a> | 948.0012 | 1893.9879 | 1893.9699 | 9.51 | 1    | 42    | 0.013   | 1    | K_ELTEEKETAFEFLLSA.- + Dimethyl:2H(4) (K); Dimethyl:2H(4) (N-term) |
| <input checked="" type="checkbox"/> <a href="#">4176</a> | 584.8030 | 2335.1827 | 2335.1709 | 5.06 | 0    | 40    | 0.022   | 1    | K_NVIIWGNHSSQYDPVNHAK.V + Dimethyl (K); Dimethyl (N-term)          |
| <input checked="" type="checkbox"/> <a href="#">4177</a> | 584.8030 | 2335.1828 | 2335.1709 | 5.09 | 0    | (37)  | 0.046   | 1    | K_NVIIWGNHSSQYDPVNHAK.V + Dimethyl (K); Dimethyl (N-term)          |

52. [IPI00323624](#) Mass: 187904 Score: 161 Queries matched: 6 emPAI: 0.09  
Tax\_Id=10090 Gene\_Symbol=C3 Isoform Long of Complement C3 precursor (Fragment)

Check to include this hit in error tolerant search or archive report

| Query                                                    | Observed | Mr(expt)  | Mr(calc)  | ppm  | Miss | Score | Expect   | Rank | Peptide                                                        |
|----------------------------------------------------------|----------|-----------|-----------|------|------|-------|----------|------|----------------------------------------------------------------|
| <input checked="" type="checkbox"/> <a href="#">888</a>  | 480.3149 | 958.6153  | 958.6113  | 4.11 | 0    | 35    | 0.033    | 1    | R_QPLTITVR.T + Dimethyl:2H(4) (N-term)                         |
| <input checked="" type="checkbox"/> <a href="#">1086</a> | 515.2898 | 1028.5650 | 1028.5614 | 3.50 | 0    | (36)  | 0.036    | 1    | K_LSINTPNSR.Q + Dimethyl (N-term)                              |
| <input checked="" type="checkbox"/> <a href="#">1105</a> | 517.3023 | 1032.5901 | 1032.5865 | 3.40 | 0    | 48    | 0.0025   | 1    | K_LSINTPNSR.Q + Dimethyl:2H(4) (N-term)                        |
| <input checked="" type="checkbox"/> <a href="#">1470</a> | 586.3583 | 1170.7021 | 1170.6972 | 4.19 | 0    | (53)  | 0.001    | 1    | K_VLVVVTQGSNAK.A + Dimethyl (K); Dimethyl (N-term)             |
| <input checked="" type="checkbox"/> <a href="#">1520</a> | 590.3837 | 1178.7529 | 1178.7475 | 4.62 | 0    | 71    | 7.9e-006 | 1    | K_VLVVVTQGSNAK.A + Dimethyl:2H(4) (K); Dimethyl:2H(4) (N-term) |

[2511](#) 737.9296 1473.8447 1473.8341 7.21 0 43 0.01 1 R\_VVIEDGVGDAVLTR.K + Dimethyl:2H(4) (N-term)

Proteins matching the same set of peptides:

[IPI00759878](#) Mass: 187905 Score: 161 Queries matched: 6  
Tax\_Id=10090 Gene\_Symbol=C3 complement component 3

53. [IPI00355382](#) Mass: 54063 Score: 161 Queries matched: 6 emPAI: 0.20  
Tax\_Id=10090 Gene\_Symbol=Wars Isoform 2 of Tryptophanyl-tRNA synthetase, cytoplasmic

Check to include this hit in error tolerant search or archive report

| Query                                                    | Observed | Mr(expt)  | Mr(calc)  | ppm  | Miss | Score | Expect   | Rank | Peptide                                        |
|----------------------------------------------------------|----------|-----------|-----------|------|------|-------|----------|------|------------------------------------------------|
| <input checked="" type="checkbox"/> <a href="#">822</a>  | 467.7450 | 933.4754  | 933.4709  | 4.84 | 0    | 39    | 0.014    | 1    | R_QLSFHFQ.- + Dimethyl (N-term)                |
| <input checked="" type="checkbox"/> <a href="#">833</a>  | 469.7575 | 937.5005  | 937.4960  | 4.86 | 0    | (28)  | 0.2      | 1    | R_QLSFHFQ.- + Dimethyl:2H(4) (N-term)          |
| <input checked="" type="checkbox"/> <a href="#">3385</a> | 615.6958 | 1844.0656 | 1844.0520 | 7.38 | 0    | (56)  | 0.00048  | 1    | K_TLIDVLQPLIAEHQAR.R + Dimethyl (N-term)       |
| <input checked="" type="checkbox"/> <a href="#">3386</a> | 615.6958 | 1844.0657 | 1844.0520 | 7.47 | 0    | (55)  | 0.00061  | 1    | K_TLIDVLQPLIAEHQAR.R + Dimethyl (N-term)       |
| <input checked="" type="checkbox"/> <a href="#">3389</a> | 617.0375 | 1848.0907 | 1848.0771 | 7.39 | 0    | 63    | 7.1e-005 | 1    | K_TLIDVLQPLIAEHQAR.R + Dimethyl:2H(4) (N-term) |
| <input checked="" type="checkbox"/> <a href="#">3390</a> | 617.0375 | 1848.0908 | 1848.0771 | 7.42 | 0    | (55)  | 0.00046  | 1    | K_TLIDVLQPLIAEHQAR.R + Dimethyl:2H(4) (N-term) |

54. [IPI00318671](#) Mass: 61841 Score: 160 Queries matched: 5 emPAI: 0.23  
Tax\_Id=10090 Gene\_Symbol=Ehd4 EH-domain containing 4-KJR (Fragment)

Check to include this hit in error tolerant search or archive report

| Query                                                    | Observed | Mr(expt)  | Mr(calc)  | ppm  | Miss | Score | Expect   | Rank | Peptide                                                             |
|----------------------------------------------------------|----------|-----------|-----------|------|------|-------|----------|------|---------------------------------------------------------------------|
| <input checked="" type="checkbox"/> <a href="#">2243</a> | 698.8561 | 1395.6977 | 1395.6857 | 8.65 | 0    | 47    | 0.0025   | 1    | R_YLLEQDFPGMR.I + Dimethyl (N-term)                                 |
| <input checked="" type="checkbox"/> <a href="#">2254</a> | 700.8682 | 1399.7218 | 1399.7108 | 7.86 | 0    | (44)  | 0.006    | 1    | R_YLLEQDFPGMR.I + Dimethyl:2H(4) (N-term)                           |
| <input checked="" type="checkbox"/> <a href="#">2562</a> | 748.8916 | 1495.7687 | 1495.7603 | 5.59 | 0    | 85    | 4.5e-007 | 1    | R_SGGMDAVQVTGGLR.S + Dimethyl:2H(4) (N-term); Oxidation (M)         |
| <input checked="" type="checkbox"/> <a href="#">3418</a> | 619.3577 | 1855.0514 | 1855.0414 | 5.34 | 1    | (42)  | 0.013    | 1    | K_SISIIDSPGILSGEKQR.I + Dimethyl (K); Dimethyl (N-term)             |
| <input checked="" type="checkbox"/> <a href="#">3430</a> | 622.0416 | 1863.1030 | 1863.0917 | 6.10 | 1    | 46    | 0.0035   | 1    | K_SISIIDSPGILSGEKQR.I + Dimethyl:2H(4) (K); Dimethyl:2H(4) (N-term) |

55. [IPI00380436](#) Mass: 103631 Score: 154 Queries matched: 6 emPAI: 0.16  
Tax\_Id=10090 Gene\_Symbol=Actn1 Alpha-actinin-1

Check to include this hit in error tolerant search or archive report

| Query                                                    | Observed | Mr(expt)  | Mr(calc)  | ppm  | Miss | Score | Expect   | Rank | Peptide                                                        |
|----------------------------------------------------------|----------|-----------|-----------|------|------|-------|----------|------|----------------------------------------------------------------|
| <input checked="" type="checkbox"/> <a href="#">1140</a> | 348.9126 | 1043.7159 | 1043.7132 | 2.54 | 0    | 33    | 0.031    | 1    | K_SIVNYKPK.I + 2 Dimethyl:2H(4) (K); Dimethyl:2H(4) (N-term)   |
| <input checked="" type="checkbox"/> <a href="#">1464</a> | 391.2165 | 1170.6277 | 1170.6244 | 2.83 | 1    | 39    | 0.018    | 1    | K_ATLPDADKER.L + Dimethyl (K); Dimethyl (N-term)               |
| <input checked="" type="checkbox"/> <a href="#">2135</a> | 453.2954 | 1356.8644 | 1356.8580 | 4.69 | 0    | 50    | 0.00075  | 1    | R_LAILGIHNEVSK.I + Dimethyl:2H(4) (K); Dimethyl:2H(4) (N-term) |
| <input checked="" type="checkbox"/> <a href="#">2209</a> | 691.8253 | 1381.6361 | 1381.6296 | 4.70 | 0    | 53    | 0.00022  | 1    | K_GISQEQMNEFR.A + Dimethyl (N-term); Oxidation (M)             |
| <input checked="" type="checkbox"/> <a href="#">2457</a> | 729.4056 | 1456.7967 | 1456.7885 | 5.63 | 0    | (54)  | 0.00082  | 1    | R_TINEVENQILTR.D + Dimethyl (N-term)                           |
| <input checked="" type="checkbox"/> <a href="#">2465</a> | 731.4187 | 1460.8229 | 1460.8136 | 6.30 | 0    | 65    | 7.3e-005 | 1    | R_TINEVENQILTR.D + Dimethyl:2H(4) (N-term)                     |

56. [IPI00136906](#) Mass: 39501 Score: 152 Queries matched: 4 emPAI: 0.29  
Tax\_Id=10090 Gene\_Symbol=Capg Macrophage-capping protein

Check to include this hit in error tolerant search or archive report

| Query                                                    | Observed | Mr(expt)  | Mr(calc)  | ppm  | Miss | Score | Expect   | Rank | Peptide                                                        |
|----------------------------------------------------------|----------|-----------|-----------|------|------|-------|----------|------|----------------------------------------------------------------|
| <input checked="" type="checkbox"/> <a href="#">2024</a> | 660.8481 | 1319.6817 | 1319.6755 | 4.73 | 0    | 58    | 0.00022  | 1    | K_VSDATGQMNLTK.V + Dimethyl (K); Dimethyl (N-term)             |
| <input checked="" type="checkbox"/> <a href="#">2052</a> | 664.8730 | 1327.7315 | 1327.7257 | 4.38 | 0    | (49)  | 0.0027   | 1    | K_VSDATGQMNLTK.V + Dimethyl:2H(4) (K); Dimethyl:2H(4) (N-term) |
| <input checked="" type="checkbox"/> <a href="#">2264</a> | 702.3906 | 1402.7667 | 1402.7569 | 7.02 | 0    | 65    | 5.9e-005 | 1    | R_QAALQVADGFISR.M + Dimethyl (N-term)                          |
| <input checked="" type="checkbox"/> <a href="#">2283</a> | 704.4031 | 1406.7917 | 1406.7820 | 6.93 | 0    | (52)  | 0.0013   | 1    | R_QAALQVADGFISR.M + Dimethyl:2H(4) (N-term)                    |

Proteins matching the same set of peptides:

[IPI00277930](#) Mass: 39030 Score: 152 Queries matched: 4

Tax\_Id=10090 Gene\_Symbol=Capg Capping protein

[IPI00876389](#) Mass: 39158 Score: 152 Queries matched: 4

Tax\_Id=10090 Gene\_Symbol=Capg 10 days neonate olfactory brain cDNA, RIKEN full-length enriched library, clone:E530115013 product:capping protein (actin filament),

57. [IPI00123223](#) Mass: 166618 Score: 150 Queries matched: 5 emPAI: 0.06

Tax\_Id=10090 Gene\_Symbol=Mug1 Murinoglobulin-1 precursor

Check to include this hit in error tolerant search or archive report

| Query                                                    | Observed | Mr(expt)  | Mr(calc)  | ppm  | Miss | Score | Expect   | Rank | Peptide                                       |
|----------------------------------------------------------|----------|-----------|-----------|------|------|-------|----------|------|-----------------------------------------------|
| <input checked="" type="checkbox"/> <a href="#">438</a>  | 352.7277 | 703.4408  | 703.4381  | 3.91 | 0    | 38    | 0.017    | 1    | K_ALGFLR.A + Dimethyl (N-term)                |
| <input checked="" type="checkbox"/> <a href="#">2379</a> | 719.3741 | 1436.7337 | 1436.7260 | 5.41 | 0    | 85    | 5.7e-007 | 1    | R_FSTSQSLPASQTR.L + Dimethyl (N-term)         |
| <input checked="" type="checkbox"/> <a href="#">2397</a> | 721.3866 | 1440.7586 | 1440.7511 | 5.26 | 0    | (76)  | 4.6e-006 | 1    | R_FSTSQSLPASQTR.L + Dimethyl:2H(4) (N-term)   |
| <input checked="" type="checkbox"/> <a href="#">2868</a> | 544.6272 | 1630.8597 | 1630.8501 | 5.90 | 0    | 51    | 0.0015   | 1    | R_AHFSVMGDILSSAIR.N + Dimethyl (N-term)       |
| <input checked="" type="checkbox"/> <a href="#">2884</a> | 545.9685 | 1634.8837 | 1634.8752 | 5.20 | 0    | (33)  | 0.11     | 1    | R_AHFSVMGDILSSAIR.N + Dimethyl:2H(4) (N-term) |

58. [IPI00319994](#) Mass: 36817 Score: 140 Queries matched: 6 emPAI: 0.50

Tax\_Id=10090 Gene\_Symbol=Ldha L-lactate dehydrogenase A chain

Check to include this hit in error tolerant search or archive report

| Query                                                    | Observed | Mr(expt)  | Mr(calc)  | ppm  | Miss | Score | Expect   | Rank | Peptide                                                      |
|----------------------------------------------------------|----------|-----------|-----------|------|------|-------|----------|------|--------------------------------------------------------------|
| <input checked="" type="checkbox"/> <a href="#">1472</a> | 586.8141 | 1171.6137 | 1171.6084 | 4.51 | 0    | 44    | 0.0056   | 1    | K_VTLTPEEEAR.L + Dimethyl (N-term)                           |
| <input checked="" type="checkbox"/> <a href="#">1488</a> | 587.8304 | 1173.6462 | 1173.6394 | 5.84 | 0    | (66)  | 4.6e-005 | 1    | K_SADTLWGIQK.E + Dimethyl (K); Dimethyl (N-term)             |
| <input checked="" type="checkbox"/> <a href="#">1496</a> | 588.8265 | 1175.6385 | 1175.6336 | 4.22 | 0    | (37)  | 0.033    | 1    | K_VTLTPEEEAR.L + Dimethyl:2H(4) (N-term)                     |
| <input checked="" type="checkbox"/> <a href="#">1527</a> | 591.8557 | 1181.6968 | 1181.6896 | 6.06 | 0    | 67    | 3.3e-005 | 1    | K_SADTLWGIQK.E + Dimethyl:2H(4) (K); Dimethyl:2H(4) (N-term) |
| <input checked="" type="checkbox"/> <a href="#">1805</a> | 413.2544 | 1236.7414 | 1236.7376 | 3.09 | 1    | (34)  | 0.074    | 1    | R_RVHPISTMIK.G + Dimethyl (K); Dimethyl (N-term)             |
| <input checked="" type="checkbox"/> <a href="#">1831</a> | 415.9377 | 1244.7912 | 1244.7879 | 2.70 | 1    | 36    | 0.029    | 1    | R_RVHPISTMIK.G + Dimethyl:2H(4) (K); Dimethyl:2H(4) (N-term) |

Proteins matching the same set of peptides:

[IPI00751369](#) Mass: 40075 Score: 140 Queries matched: 6

Tax\_Id=10090 Gene\_Symbol=Ldha L-lactate dehydrogenase

59. [IPI00118899](#) Mass: 105368 Score: 140 Queries matched: 3 emPAI: 0.08

Tax\_Id=10090 Gene\_Symbol=Actn4 Alpha-actinin-4

Check to include this hit in error tolerant search or archive report

| Query | Observed | Mr(expt) | Mr(calc) | ppm | Miss | Score | Expect | Rank | Peptide |
|-------|----------|----------|----------|-----|------|-------|--------|------|---------|
|-------|----------|----------|----------|-----|------|-------|--------|------|---------|

|                                     |                      |          |           |           |      |   |      |          |   |                                            |
|-------------------------------------|----------------------|----------|-----------|-----------|------|---|------|----------|---|--------------------------------------------|
| <input checked="" type="checkbox"/> | <a href="#">2215</a> | 692.8489 | 1383.6833 | 1383.6754 | 5.69 | 0 | 79   | 1.1e-006 | 1 | K_GISQEQMQEFR.A + Dimethyl:2H(4) (N-term)  |
|                                     | <a href="#">2457</a> | 729.4056 | 1456.7967 | 1456.7885 | 5.63 | 0 | (54) | 0.00082  | 1 | R_TINEVENQILTR.D + Dimethyl (N-term)       |
|                                     | <a href="#">2465</a> | 731.4187 | 1460.8229 | 1460.8136 | 6.30 | 0 | 65   | 7.3e-005 | 1 | R_TINEVENQILTR.D + Dimethyl:2H(4) (N-term) |

60. [IPI00123181](#) Mass: 227414 Score: 139 Queries matched: 6 emPAI: 0.06

Tax\_Id=10090 Gene\_Symbol=Myh9 Myosin-9

Check to include this hit in error tolerant search or archive report

| Query                               | Observed             | Mr(expt) | Mr(calc)  | ppm       | Miss | Score | Expect | Rank     | Peptide |                                                                     |
|-------------------------------------|----------------------|----------|-----------|-----------|------|-------|--------|----------|---------|---------------------------------------------------------------------|
| <input checked="" type="checkbox"/> | <a href="#">831</a>  | 469.3140 | 936.6135  | 936.6095  | 4.26 | 0     | 59     | 0.00016  | 1       | K_ASIAALEAK.I + Dimethyl:2H(4) (K); Dimethyl:2H(4) (N-term)         |
| <input checked="" type="checkbox"/> | <a href="#">2798</a> | 533.9695 | 1598.8867 | 1598.8781 | 5.42 | 0     | 43     | 0.012    | 1       | K_VSHLLGINVTDFTR.G + Dimethyl (N-term)                              |
| <input checked="" type="checkbox"/> | <a href="#">2805</a> | 535.3114 | 1602.9124 | 1602.9032 | 5.74 | 0     | (39)   | 0.028    | 1       | K_VSHLLGINVTDFTR.G + Dimethyl:2H(4) (N-term)                        |
| <input checked="" type="checkbox"/> | <a href="#">3017</a> | 561.7184 | 1682.1335 | 1682.1248 | 5.18 | 1     | 57     | 1.7e-005 | 1       | R_VISGVLQLGNIAFKK.E + 2 Dimethyl:2H(4) (K); Dimethyl:2H(4) (N-term) |
| <input checked="" type="checkbox"/> | <a href="#">3233</a> | 597.6956 | 1790.0650 | 1790.0542 | 6.07 | 0     | 55     | 0.00039  | 1       | R_QLLQANPILEAFGNAK.T + Dimethyl:2H(4) (K); Dimethyl:2H(4) (N-term)  |
| <input checked="" type="checkbox"/> | <a href="#">3888</a> | 522.0145 | 2084.0290 | 2084.0208 | 3.95 | 1     | 25     | 0.43     | 1       | K_TLEDEAKTHEAQIQEMR.Q + Dimethyl (K); Dimethyl (N-term)             |

Proteins matching the same set of peptides:

[IPI00788324](#) Mass: 227429 Score: 139 Queries matched: 6

Tax\_Id=10090 Gene\_Symbol=Myh9 15 days pregnant adult female amnion cDNA, RIKEN full-length enriched library, clone:M421002E03 product:myosin heavy chain IX, full i

61. [IPI00223757](#) Mass: 36052 Score: 136 Queries matched: 3 emPAI: 0.15

Tax\_Id=10090 Gene\_Symbol=Akrlb3 Aldose reductase

Check to include this hit in error tolerant search or archive report

| Query                               | Observed             | Mr(expt) | Mr(calc)  | ppm       | Miss | Score | Expect | Rank     | Peptide |                                              |
|-------------------------------------|----------------------|----------|-----------|-----------|------|-------|--------|----------|---------|----------------------------------------------|
| <input checked="" type="checkbox"/> | <a href="#">836</a>  | 469.7862 | 937.5578  | 937.5535  | 4.59 | 0     | 27     | 0.22     | 1       | K_VAIDLGYR.H + Dimethyl:2H(4) (N-term)       |
| <input checked="" type="checkbox"/> | <a href="#">2821</a> | 808.4501 | 1614.8857 | 1614.8729 | 7.92 | 0     | 88     | 3.8e-007 | 1       | K_TIGVSNFNPLQIER.I + Dimethyl (N-term)       |
| <input checked="" type="checkbox"/> | <a href="#">2830</a> | 810.4626 | 1618.9107 | 1618.8981 | 7.84 | 0     | (76)   | 5.5e-006 | 1       | K_TIGVSNFNPLQIER.I + Dimethyl:2H(4) (N-term) |

62. [IPI00137331](#) Mass: 51885 Score: 136 Queries matched: 4 emPAI: 0.10

Tax\_Id=10090 Gene\_Symbol=Cap1 Adenylyl cyclase-associated protein 1

Check to include this hit in error tolerant search or archive report

| Query                               | Observed             | Mr(expt) | Mr(calc)  | ppm       | Miss | Score | Expect | Rank     | Peptide |                                                                                    |
|-------------------------------------|----------------------|----------|-----------|-----------|------|-------|--------|----------|---------|------------------------------------------------------------------------------------|
| <input checked="" type="checkbox"/> | <a href="#">3434</a> | 467.0316 | 1864.0975 | 1864.0932 | 2.30 | 2     | 27     | 0.26     | 1       | K_HVSDDMKTHKNPALK.A + 3 Dimethyl:2H(4) (K); Dimethyl:2H(4) (N-term); Oxidation (M) |
| <input checked="" type="checkbox"/> | <a href="#">3644</a> | 662.0378 | 1983.0917 | 1983.0789 | 6.46 | 0     | 75     | 6.8e-006 | 1       | R_SALFAQINQGESITHALK.H + Dimethyl (K); Dimethyl (N-term)                           |
| <input checked="" type="checkbox"/> | <a href="#">3656</a> | 664.7208 | 1991.1406 | 1991.1291 | 5.79 | 0     | (62)   | 0.00011  | 1       | R_SALFAQINQGESITHALK.H + Dimethyl:2H(4) (K); Dimethyl:2H(4) (N-term)               |
| <input checked="" type="checkbox"/> | <a href="#">3657</a> | 664.7212 | 1991.1417 | 1991.1291 | 6.34 | 0     | (54)   | 0.00068  | 1       | R_SALFAQINQGESITHALK.H + Dimethyl:2H(4) (K); Dimethyl:2H(4) (N-term)               |

Proteins matching the same set of peptides:

[IPI00869430](#) Mass: 51875 Score: 136 Queries matched: 4

Tax\_Id=10090 Gene\_Symbol=Cap1 Adenylyl cyclase-associated protein

63. [IPI00223216](#) Mass: 33673 Score: 134 Queries matched: 3 emPAI: 0.16

Tax\_Id=10090 Gene\_Symbol=Tst Thiosulfate sulfurtransferase

Check to include this hit in error tolerant search or archive report

| Query                                                    | Observed | Mr(expt)  | Mr(calc)  | ppm  | Miss | Score | Expect   | Rank | Peptide                                            |
|----------------------------------------------------------|----------|-----------|-----------|------|------|-------|----------|------|----------------------------------------------------|
| <input checked="" type="checkbox"/> <a href="#">3901</a> | 699.0362 | 2094.0867 | 2094.0746 | 5.80 | 0    | 71    | 1.9e-005 | 1    | R_YLGTQPEPDI VGLDSGHIR.G + Dimethyl (N-term)       |
| <input checked="" type="checkbox"/> <a href="#">3906</a> | 700.3782 | 2098.1127 | 2098.0997 | 6.20 | 0    | (62)  | 0.00017  | 1    | R_YLGTQPEPDI VGLDSGHIR.G + Dimethyl:2H(4) (N-term) |
| <input checked="" type="checkbox"/> <a href="#">3907</a> | 700.3782 | 2098.1127 | 2098.0997 | 6.21 | 0    | (66)  | 5.9e-005 | 1    | R_YLGTQPEPDI VGLDSGHIR.G + Dimethyl:2H(4) (N-term) |

64. [IPI00117167](#) Mass: 86287 Score: 122 Queries matched: 7 emPAI: 0.16

Tax\_Id=10090 Gene\_Symbol=Gsn Isoform 1 of Gelsolin precursor

Check to include this hit in error tolerant search or archive report

| Query                                                    | Observed | Mr(expt)  | Mr(calc)  | ppm  | Miss | Score | Expect   | Rank | Peptide                                                             |
|----------------------------------------------------------|----------|-----------|-----------|------|------|-------|----------|------|---------------------------------------------------------------------|
| <input checked="" type="checkbox"/> <a href="#">630</a>  | 407.2646 | 812.5147  | 812.5120  | 3.31 | 0    | 30    | 0.096    | 1    | R_TPITVVR.Q + Dimethyl (N-term)                                     |
| <input checked="" type="checkbox"/> <a href="#">633</a>  | 409.2771 | 816.5397  | 816.5371  | 3.20 | 0    | (28)  | 0.12     | 1    | R_TPITVVR.Q + Dimethyl:2H(4) (N-term)                               |
| <input checked="" type="checkbox"/> <a href="#">2234</a> | 696.3848 | 1390.7550 | 1390.7456 | 6.74 | 0    | 73    | 1.1e-005 | 1    | K_SGALNSNDAFV LK.T + Dimethyl (K); Dimethyl (N-term)                |
| <input checked="" type="checkbox"/> <a href="#">2250</a> | 700.4101 | 1398.8056 | 1398.7958 | 7.00 | 0    | (59)  | 0.00028  | 1    | K_SGALNSNDAFV LK.T + Dimethyl:2H(4) (K); Dimethyl:2H(4) (N-term)    |
| <input checked="" type="checkbox"/> <a href="#">3511</a> | 629.3508 | 1885.0305 | 1885.0197 | 5.72 | 0    | (30)  | 0.25     | 1    | R_QTQVSVLPEGGETPLFK.Q + Dimethyl (K); Dimethyl (N-term)             |
| <input checked="" type="checkbox"/> <a href="#">3512</a> | 629.3509 | 1885.0307 | 1885.0197 | 5.86 | 0    | 38    | 0.04     | 1    | R_QTQVSVLPEGGETPLFK.Q + Dimethyl (K); Dimethyl (N-term)             |
| <input checked="" type="checkbox"/> <a href="#">3534</a> | 632.0343 | 1893.0811 | 1893.0699 | 5.89 | 0    | (35)  | 0.058    | 1    | R_QTQVSVLPEGGETPLFK.Q + Dimethyl:2H(4) (K); Dimethyl:2H(4) (N-term) |

Proteins matching the same set of peptides:

[IPI00759948](#) Mass: 80997 Score: 122 Queries matched: 7

Tax\_Id=10090 Gene\_Symbol=Gsn Isoform 2 of Gelsolin precursor

65. [IPI00113141](#) Mass: 51988 Score: 122 Queries matched: 4 emPAI: 0.16

Tax\_Id=10090 Gene\_Symbol=Cs Citrate synthase, mitochondrial precursor

Check to include this hit in error tolerant search or archive report

| Query                                                    | Observed | Mr(expt)  | Mr(calc)  | ppm  | Miss | Score | Expect   | Rank | Peptide                                          |
|----------------------------------------------------------|----------|-----------|-----------|------|------|-------|----------|------|--------------------------------------------------|
| <input checked="" type="checkbox"/> <a href="#">1337</a> | 560.2881 | 1118.5617 | 1118.5567 | 4.45 | 0    | (34)  | 0.042    | 1    | R_EGSSIGAIDSR.L + Dimethyl (N-term)              |
| <input checked="" type="checkbox"/> <a href="#">1351</a> | 562.3006 | 1122.5866 | 1122.5819 | 4.26 | 0    | 52    | 0.00073  | 1    | R_EGSSIGAIDSR.L + Dimethyl:2H(4) (N-term)        |
| <input checked="" type="checkbox"/> <a href="#">3904</a> | 700.0475 | 2097.1206 | 2097.1044 | 7.72 | 1    | (63)  | 0.00012  | 1    | K_GLVYETSVLDPDEGIRFR.G + Dimethyl:2H(4) (N-term) |
| <input checked="" type="checkbox"/> <a href="#">3905</a> | 700.0475 | 2097.1207 | 2097.1044 | 7.77 | 1    | 67    | 4.5e-005 | 1    | K_GLVYETSVLDPDEGIRFR.G + Dimethyl:2H(4) (N-term) |

66. [IPI00466069](#) Mass: 96222 Score: 122 Queries matched: 8 emPAI: 0.20

Tax\_Id=10090 Gene\_Symbol=Eef2 Elongation factor 2

Check to include this hit in error tolerant search or archive report

| Query                                                    | Observed | Mr(expt)  | Mr(calc)  | ppm  | Miss | Score | Expect  | Rank | Peptide                                                           |
|----------------------------------------------------------|----------|-----------|-----------|------|------|-------|---------|------|-------------------------------------------------------------------|
| <input checked="" type="checkbox"/> <a href="#">875</a>  | 477.7652 | 953.5158  | 953.5120  | 3.96 | 0    | 33    | 0.053   | 1    | K_SDPVVS YR.E + Dimethyl:2H(4) (N-term)                           |
| <input checked="" type="checkbox"/> <a href="#">1030</a> | 501.3076 | 1000.6006 | 1000.5967 | 3.82 | 0    | 42    | 0.013   | 1    | R_GGGQIIPTAR.R + Dimethyl:2H(4) (N-term)                          |
| <input checked="" type="checkbox"/> <a href="#">1339</a> | 560.3146 | 1118.6147 | 1118.6084 | 5.64 | 0    | (55)  | 0.00064 | 1    | M_VNFTVDQIR.A + Dimethyl (N-term)                                 |
| <input checked="" type="checkbox"/> <a href="#">1352</a> | 562.3271 | 1122.6396 | 1122.6335 | 5.43 | 0    | 58    | 0.00028 | 1    | M_VNFTVDQIR.A + Dimethyl:2H(4) (N-term)                           |
| <input checked="" type="checkbox"/> <a href="#">2372</a> | 479.2907 | 1434.8503 | 1434.8446 | 3.99 | 1    | (28)  | 0.27    | 1    | R_VAVEAKNPADLPK.L + 2 Dimethyl (K); Dimethyl (N-term)             |
| <input checked="" type="checkbox"/> <a href="#">2418</a> | 483.3158 | 1446.9257 | 1446.9199 | 3.96 | 1    | 36    | 0.02    | 1    | R_VAVEAKNPADLPK.L + 2 Dimethyl:2H(4) (K); Dimethyl:2H(4) (N-term) |

- [3802](#) 681.3707 2041.0904 2041.0795 5.34 0 29 0.27 1 [R\\_GHVFEESQVAGTPMFVVK.A](#) + Dimethyl:2H(4) (K); Dimethyl:2H(4) (N-term); Oxidation (M)
- [4013](#) 550.5436 2198.1455 2198.1331 5.61 1 48 0.0035 1 [K\\_ARFPFDGLAEDIDKGEVSAR.Q](#) + Dimethyl (K); Dimethyl (N-term)

67. [IPI00128522](#) Mass: 23057 Score: 118 Queries matched: 2 emPAI: 0.24

Tax\_Id=10090 Gene\_Symbol=Hspbl Isoform A of Heat shock protein beta-1

Check to include this hit in error tolerant search or archive report

| Query                                                    | Observed | Mr(expt)  | Mr(calc)  | ppm  | Miss | Score | Expect   | Rank | Peptide                                                                               |
|----------------------------------------------------------|----------|-----------|-----------|------|------|-------|----------|------|---------------------------------------------------------------------------------------|
| <input checked="" type="checkbox"/> <a href="#">3062</a> | 566.9740 | 1697.9002 | 1697.8948 | 3.17 | 1    | 82    | 1.5e-006 | 1    | <a href="#">R_AQIGGPEAGKSEQSGAK.-</a> + 2 Dimethyl (K); Dimethyl (N-term)             |
| <input checked="" type="checkbox"/> <a href="#">3081</a> | 570.9990 | 1709.9752 | 1709.9701 | 2.99 | 1    | (70)  | 2.2e-005 | 1    | <a href="#">R_AQIGGPEAGKSEQSGAK.-</a> + 2 Dimethyl:2H(4) (K); Dimethyl:2H(4) (N-term) |

Proteins matching the same set of peptides:

- [IPI00468068](#) Mass: 22004 Score: 118 Queries matched: 2  
Tax\_Id=10090 Gene\_Symbol=Hspbl Isoform B of Heat shock protein beta-1
- [IPI00623819](#) Mass: 19425 Score: 118 Queries matched: 2  
Tax\_Id=10090 Gene\_Symbol=Hspbl Isoform C of Heat shock protein beta-1

68. [IPI00129526](#) Mass: 92703 Score: 116 Queries matched: 6 emPAI: 0.18

Tax\_Id=10090 Gene\_Symbol=Hsp90b1 Endoplasmin precursor

Check to include this hit in error tolerant search or archive report

| Query                                                    | Observed | Mr(expt)  | Mr(calc)  | ppm  | Miss | Score | Expect  | Rank | Peptide                                                                          |
|----------------------------------------------------------|----------|-----------|-----------|------|------|-------|---------|------|----------------------------------------------------------------------------------|
| <input checked="" type="checkbox"/> <a href="#">1124</a> | 519.7793 | 1037.5440 | 1037.5393 | 4.56 | 0    | (29)  | 0.16    | 1    | <a href="#">K_SGTSEFLNK.M</a> + Dimethyl (K); Dimethyl (N-term)                  |
| <input checked="" type="checkbox"/> <a href="#">1153</a> | 523.8042 | 1045.5938 | 1045.5895 | 4.12 | 0    | 42    | 0.011   | 1    | <a href="#">K_SGTSEFLNK.M</a> + Dimethyl:2H(4) (K); Dimethyl:2H(4) (N-term)      |
| <input checked="" type="checkbox"/> <a href="#">1165</a> | 525.3004 | 1048.5863 | 1048.5804 | 5.56 | 0    | 44    | 0.0085  | 1    | <a href="#">R_SGYLLPDTK.A</a> + Dimethyl (K); Dimethyl (N-term)                  |
| <input checked="" type="checkbox"/> <a href="#">1204</a> | 529.3252 | 1056.6358 | 1056.6307 | 4.88 | 0    | (31)  | 0.13    | 1    | <a href="#">R_SGYLLPDTK.A</a> + Dimethyl:2H(4) (K); Dimethyl:2H(4) (N-term)      |
| <a href="#">2061</a>                                     | 666.3602 | 1330.7058 | 1330.6980 | 5.87 | 0    | 60    | 0.00016 | 1    | <a href="#">R_ELISNASDALDK.I</a> + Dimethyl (K); Dimethyl (N-term)               |
| <a href="#">2812</a>                                     | 536.9876 | 1607.9410 | 1607.9334 | 4.75 | 1    | 43    | 0.0087  | 1    | <a href="#">R_ELISNASDALDKIR.L</a> + Dimethyl:2H(4) (K); Dimethyl:2H(4) (N-term) |

69. [IPI00269661](#) Mass: 39856 Score: 114 Queries matched: 2 emPAI: 0.06

Tax\_Id=10090 Gene\_Symbol=Hnrpa3 Isoform 1 of Heterogeneous nuclear ribonucleoprotein A3

Check to include this hit in error tolerant search or archive report

| Query                                                    | Observed | Mr(expt)  | Mr(calc)  | ppm  | Miss | Score | Expect   | Rank | Peptide                                                           |
|----------------------------------------------------------|----------|-----------|-----------|------|------|-------|----------|------|-------------------------------------------------------------------|
| <input checked="" type="checkbox"/> <a href="#">3600</a> | 648.2895 | 1941.8466 | 1941.8391 | 3.86 | 0    | 69    | 2.8e-006 | 1    | <a href="#">R_SSGSPYGGYGSGGGSGYGS.R</a> + Dimethyl:2H(4) (N-term) |
| <input checked="" type="checkbox"/> <a href="#">3601</a> | 648.2895 | 1941.8467 | 1941.8391 | 3.90 | 0    | (68)  | 3.9e-006 | 1    | <a href="#">R_SSGSPYGGYGSGGGSGYGS.R</a> + Dimethyl:2H(4) (N-term) |

Proteins matching the same set of peptides:

- [IPI00269662](#) Mass: 37291 Score: 114 Queries matched: 2  
Tax\_Id=10090 Gene\_Symbol=Hnrpa3 Isoform 2 of Heterogeneous nuclear ribonucleoprotein A3
- [IPI00459722](#) Mass: 34683 Score: 114 Queries matched: 2  
Tax\_Id=10090 Gene\_Symbol=Hnrpa3 Hnrpa3 protein
- [IPI00461800](#) Mass: 37447 Score: 114 Queries matched: 2  
Tax\_Id=10090 Gene\_Symbol=EG432946 similar to heterogeneous nuclear ribonucleoprotein A3, isoform 1
- [IPI00466185](#) Mass: 33120 Score: 114 Queries matched: 2



Tax\_Id=10090 Gene\_Symbol=- 33 kDa protein  
[IPI00626666](#) Mass: 21719 Score: 114 Queries matched: 2  
 Tax\_Id=10090 Gene\_Symbol=- 22 kDa protein  
[IPI00659723](#) Mass: 37325 Score: 114 Queries matched: 2  
 Tax\_Id=10090 Gene\_Symbol=LOC630401 similar to heterogeneous nuclear ribonucleoprotein A3, isoform 5  
[IPI00663550](#) Mass: 32639 Score: 114 Queries matched: 2  
 Tax\_Id=10090 Gene\_Symbol=LOC630401 similar to heterogeneous nuclear ribonucleoprotein A3, isoform 1  
[IPI00664047](#) Mass: 32155 Score: 114 Queries matched: 2  
 Tax\_Id=10090 Gene\_Symbol=LOC633657 similar to heterogeneous nuclear ribonucleoprotein A3, isoform 5  
[IPI00667787](#) Mass: 36745 Score: 114 Queries matched: 2  
 Tax\_Id=10090 Gene\_Symbol=LOC545592 similar to heterogeneous nuclear ribonucleoprotein A3, isoform 16  
[IPI00670004](#) Mass: 36815 Score: 114 Queries matched: 2  
 Tax\_Id=10090 Gene\_Symbol=EG627828 similar to heterogeneous nuclear ribonucleoprotein A3, isoform 5  
[IPI00670681](#) Mass: 34383 Score: 114 Queries matched: 2  
 Tax\_Id=10090 Gene\_Symbol=EG432946 similar to heterogeneous nuclear ribonucleoprotein A3, isoform 7  
[IPI00674712](#) Mass: 32090 Score: 114 Queries matched: 2  
 Tax\_Id=10090 Gene\_Symbol=EG627828 similar to heterogeneous nuclear ribonucleoprotein A3, isoform 1  
[IPI00677689](#) Mass: 34489 Score: 114 Queries matched: 2  
 Tax\_Id=10090 Gene\_Symbol=LOC545592 similar to heterogeneous nuclear ribonucleoprotein A3, isoform 12  
[IPI00749630](#) Mass: 37345 Score: 114 Queries matched: 2  
 Tax\_Id=10090 Gene\_Symbol=EG668559 similar to heterogeneous nuclear ribonucleoprotein A3, isoform 4  
[IPI00750059](#) Mass: 35197 Score: 114 Queries matched: 2  
 Tax\_Id=10090 Gene\_Symbol=EG668559 similar to heterogeneous nuclear ribonucleoprotein A3, isoform 3  
[IPI00750428](#) Mass: 30660 Score: 114 Queries matched: 2  
 Tax\_Id=10090 Gene\_Symbol=LOC545592 similar to heterogeneous nuclear ribonucleoprotein A3, isoform 13  
[IPI00751584](#) Mass: 18456 Score: 114 Queries matched: 2  
 Tax\_Id=10090 Gene\_Symbol=Hnrpa3 Heterogeneous nuclear ribonucleoprotein A3  
[IPI00752179](#) Mass: 33165 Score: 114 Queries matched: 2  
 Tax\_Id=10090 Gene\_Symbol=EG668559 similar to heterogeneous nuclear ribonucleoprotein A3, isoform 1  
[IPI00757273](#) Mass: 33145 Score: 114 Queries matched: 2  
 Tax\_Id=10090 Gene\_Symbol=LOC630401 similar to heterogeneous nuclear ribonucleoprotein A3, isoform 6  
[IPI00849556](#) Mass: 33930 Score: 114 Queries matched: 2  
 Tax\_Id=10090 Gene\_Symbol=EG432946 similar to heterogeneous nuclear ribonucleoprotein A3  
[IPI00849731](#) Mass: 33408 Score: 114 Queries matched: 2  
 Tax\_Id=10090 Gene\_Symbol=LOC633657 similar to heterogeneous nuclear ribonucleoprotein A3

---

70. [IPI00467833](#) Mass: 27038 Score: 113 Queries matched: 2 emPAI: 0.20  
 Tax\_Id=10090 Gene\_Symbol=Tpi1 Triosephosphate isomerase

Check to include this hit in error tolerant search or archive report

| Query                                                    | Observed | Mr(expt)  | Mr(calc)  | ppm  | Miss | Score | Expect   | Rank | Peptide                                                         |
|----------------------------------------------------------|----------|-----------|-----------|------|------|-------|----------|------|-----------------------------------------------------------------|
| <input checked="" type="checkbox"/> <a href="#">2647</a> | 508.2682 | 1521.7828 | 1521.7787 | 2.71 | 0    | 74    | 6.4e-006 | 1    | K_TATPQQAQEVHEK.L + Dimethyl (K); Dimethyl (N-term)             |
| <input checked="" type="checkbox"/> <a href="#">2660</a> | 510.9515 | 1529.8328 | 1529.8289 | 2.52 | 0    | (69)  | 2.4e-005 | 1    | K_TATPQQAQEVHEK.L + Dimethyl:2H(4) (K); Dimethyl:2H(4) (N-term) |

---

71. [IPI00462072](#) Mass: 47453 Score: 111 Queries matched: 8 emPAI: 0.37  
 Tax\_Id=10090 Gene\_Symbol=EG433182;Eno1;LOC100044223 Alpha-enolase

Check to include this hit in error tolerant search or archive report

| Query                                                    | Observed | Mr(expt)  | Mr(calc)  | ppm  | Miss | Score | Expect  | Rank | Peptide                                                                   |
|----------------------------------------------------------|----------|-----------|-----------|------|------|-------|---------|------|---------------------------------------------------------------------------|
| <input checked="" type="checkbox"/> <a href="#">880</a>  | 478.3150 | 954.6155  | 954.6113  | 4.37 | 0    | 28    | 0.22    | 1    | K_TIAPALVSK.K + Dimethyl (K); Dimethyl (N-term)                           |
| <input checked="" type="checkbox"/> <a href="#">895</a>  | 482.3402 | 962.6659  | 962.6616  | 4.52 | 0    | (26)  | 0.13    | 1    | K_TIAPALVSK.K + Dimethyl:2H(4) (K); Dimethyl:2H(4) (N-term)               |
| <input checked="" type="checkbox"/> <a href="#">999</a>  | 332.8872 | 995.6397  | 995.6367  | 2.97 | 1    | 26    | 0.33    | 1    | R_SFRNPLAK.- + Dimethyl:2H(4) (K); Dimethyl:2H(4) (N-term)                |
| <input checked="" type="checkbox"/> <a href="#">1801</a> | 413.2357 | 1236.6854 | 1236.6826 | 2.26 | 0    | (49)  | 0.0023  | 1    | K_GVSQAVEHINK.T + Dimethyl (K); Dimethyl (N-term)                         |
| <input checked="" type="checkbox"/> <a href="#">1829</a> | 415.9194 | 1244.7365 | 1244.7328 | 2.91 | 0    | 61    | 0.00013 | 1    | K_GVSQAVEHINK.T + Dimethyl:2H(4) (K); Dimethyl:2H(4) (N-term)             |
| <input checked="" type="checkbox"/> <a href="#">4372</a> | 648.3453 | 2589.3520 | 2589.3398 | 4.71 | 2    | 36    | 0.061   | 1    | R_AAVPSGASTGIYEALERLNDKTR.F + Dimethyl (K); Dimethyl (N-term)             |
| <input checked="" type="checkbox"/> <a href="#">4384</a> | 650.3584 | 2597.4045 | 2597.3900 | 5.56 | 2    | (26)  | 0.48    | 1    | R_AAVPSGASTGIYEALERLNDKTR.F + Dimethyl:2H(4) (K); Dimethyl:2H(4) (N-term) |
| <input checked="" type="checkbox"/> <a href="#">4385</a> | 650.3585 | 2597.4047 | 2597.3900 | 5.66 | 2    | (28)  | 0.3     | 1    | R_AAVPSGASTGIYEALERLNDKTR.F + Dimethyl:2H(4) (K); Dimethyl:2H(4) (N-term) |

Proteins matching the same set of peptides:

[IPI00849751](#) Mass: 19464 Score: 111 Queries matched: 8

Tax\_Id=10090 Gene\_Symbol=LOC100047882 similar to enolase 1, alpha non-neuron

72. [IPI00115522](#) Mass: 61801 Score: 110 Queries matched: 7 emPAI: 0.28

Tax\_Id=10090 Gene\_Symbol=Fga fibrinogen, alpha polypeptide

Check to include this hit in error tolerant search or archive report

| Query                                                    | Observed | Mr(expt)  | Mr(calc)  | ppm  | Miss | Score | Expect  | Rank | Peptide                                                                              |
|----------------------------------------------------------|----------|-----------|-----------|------|------|-------|---------|------|--------------------------------------------------------------------------------------|
| <input checked="" type="checkbox"/> <a href="#">989</a>  | 496.3431 | 990.6716  | 990.6677  | 3.91 | 0    | 41    | 0.0047  | 1    | K_QLQQVIAK.E + Dimethyl:2H(4) (K); Dimethyl:2H(4) (N-term)                           |
| <input checked="" type="checkbox"/> <a href="#">2381</a> | 719.4229 | 1436.8312 | 1436.8189 | 8.52 | 0    | 31    | 0.16    | 1    | K_MSPVPDLVPGSFK.S + Dimethyl:2H(4) (K); Dimethyl:2H(4) (N-term)                      |
| <input checked="" type="checkbox"/> <a href="#">2446</a> | 727.4194 | 1452.8243 | 1452.8138 | 7.22 | 0    | (27)  | 0.37    | 1    | K_MSPVPDLVPGSFK.S + Dimethyl:2H(4) (K); Dimethyl:2H(4) (N-term); Oxidation (M)       |
| <input checked="" type="checkbox"/> <a href="#">2658</a> | 510.5934 | 1528.7582 | 1528.7521 | 3.99 | 0    | (54)  | 0.00041 | 1    | R_EINLQDYEGHQK.Q + Dimethyl (K); Dimethyl (N-term)                                   |
| <input checked="" type="checkbox"/> <a href="#">2683</a> | 513.2770 | 1536.8093 | 1536.8024 | 4.50 | 0    | 56    | 0.0005  | 1    | R_EINLQDYEGHQK.Q + Dimethyl:2H(4) (K); Dimethyl:2H(4) (N-term)                       |
| <input checked="" type="checkbox"/> <a href="#">3218</a> | 445.2084 | 1776.8045 | 1776.7999 | 2.62 | 1    | 39    | 0.0053  | 1    | K_MADEAGSEAHREGETR.N + Dimethyl:2H(4) (N-term)                                       |
| <input checked="" type="checkbox"/> <a href="#">4059</a> | 444.4196 | 2217.0619 | 2217.0571 | 2.12 | 2    | 26    | 0.25    | 1    | K_TYKMADEAGSEAHREGETR.N + Dimethyl:2H(4) (K); Dimethyl:2H(4) (N-term); Oxidation (M) |

73. [IPI00137409](#) Mass: 68272 Score: 109 Queries matched: 10 emPAI: 0.35

Tax\_Id=10090 Gene\_Symbol=Tkt Transketolase

Check to include this hit in error tolerant search or archive report

| Query                                                    | Observed | Mr(expt)  | Mr(calc)  | ppm  | Miss | Score | Expect  | Rank | Peptide                                                               |
|----------------------------------------------------------|----------|-----------|-----------|------|------|-------|---------|------|-----------------------------------------------------------------------|
| <input checked="" type="checkbox"/> <a href="#">632</a>  | 408.2542 | 814.4939  | 814.4912  | 3.32 | 0    | 28    | 0.22    | 1    | K_LILDSAR.A + Dimethyl (N-term)                                       |
| <input checked="" type="checkbox"/> <a href="#">774</a>  | 449.2811 | 896.5477  | 896.5443  | 3.77 | 0    | 54    | 0.00043 | 1    | R_LAVSQVPR.S + Dimethyl (N-term)                                      |
| <input checked="" type="checkbox"/> <a href="#">787</a>  | 451.2935 | 900.5725  | 900.5695  | 3.36 | 0    | (47)  | 0.0034  | 1    | R_LAVSQVPR.S + Dimethyl:2H(4) (N-term)                                |
| <input checked="" type="checkbox"/> <a href="#">2025</a> | 440.9115 | 1319.7128 | 1319.7085 | 3.22 | 0    | 39    | 0.025   | 1    | K_ISSDLGDGHPVPK.Q + Dimethyl (K); Dimethyl (N-term)                   |
| <input checked="" type="checkbox"/> <a href="#">2516</a> | 492.9541 | 1475.8404 | 1475.8348 | 3.81 | 1    | 29    | 0.25    | 1    | R_KISSDLGDGHPVPK.Q + 2 Dimethyl (K); Dimethyl (N-term)                |
| <input checked="" type="checkbox"/> <a href="#">2538</a> | 372.9859 | 1487.9146 | 1487.9101 | 3.03 | 1    | (25)  | 0.37    | 1    | R_KISSDLGDGHPVPK.Q + 2 Dimethyl:2H(4) (K); Dimethyl:2H(4) (N-term)    |
| <input checked="" type="checkbox"/> <a href="#">2829</a> | 540.3158 | 1617.9256 | 1617.9164 | 5.67 | 1    | 42    | 0.012   | 1    | K_MFGIDKDAIVQAVK.G + 2 Dimethyl (K); Dimethyl (N-term)                |
| <input checked="" type="checkbox"/> <a href="#">2867</a> | 544.3411 | 1630.0014 | 1629.9917 | 5.91 | 1    | (34)  | 0.039   | 1    | K_MFGIDKDAIVQAVK.G + 2 Dimethyl:2H(4) (K); Dimethyl:2H(4) (N-term)    |
| <input checked="" type="checkbox"/> <a href="#">2882</a> | 545.6478 | 1633.9215 | 1633.9113 | 6.23 | 1    | (37)  | 0.041   | 1    | K_MFGIDKDAIVQAVK.G + 2 Dimethyl (K); Dimethyl (N-term); Oxidation (M) |
| <input checked="" type="checkbox"/> <a href="#">3817</a> | 683.3768 | 2047.1087 | 2047.0949 | 6.73 | 0    | 35    | 0.071   | 1    | K_ILATPPQEDAPSVDIANIR.M + Dimethyl (N-term)                           |

74. [IPI00468203](#) Mass: 38937 Score: 107 Queries matched: 4 emPAI: 0.21

Tax\_Id=10090 Gene\_Symbol=Anxa2 Annexin A2

Check to include this hit in error tolerant search or archive report

| Query                                                    | Observed | Mr(expt)  | Mr(calc)  | ppm  | Miss | Score | Expect   | Rank | Peptide                                                                      |
|----------------------------------------------------------|----------|-----------|-----------|------|------|-------|----------|------|------------------------------------------------------------------------------|
| <input checked="" type="checkbox"/> <a href="#">619</a>  | 405.2937 | 808.5729  | 808.5696  | 4.05 | 0    | 32    | 0.031    | 1    | <a href="#">K_LMVALAK</a> .G + Dimethyl:2H(4) (K); Dimethyl:2H(4) (N-term)   |
| <input checked="" type="checkbox"/> <a href="#">1327</a> | 372.2294 | 1113.6664 | 1113.6634 | 2.70 | 1    | 32    | 0.13     | 1    | <a href="#">R_ELYDAGVKR</a> .K + Dimethyl:2H(4) (K); Dimethyl:2H(4) (N-term) |
| <input checked="" type="checkbox"/> <a href="#">1898</a> | 636.8333 | 1271.6520 | 1271.6469 | 3.94 | 0    | 69    | 1.5e-005 | 1    | <a href="#">R_TNQELQEINR</a> .V + Dimethyl (N-term)                          |
| <input checked="" type="checkbox"/> <a href="#">1907</a> | 638.8461 | 1275.6777 | 1275.6721 | 4.44 | 0    | (68)  | 2.6e-005 | 1    | <a href="#">R_TNQELQEINR</a> .V + Dimethyl:2H(4) (N-term)                    |

Proteins matching the same set of peptides:

[IPI00605518](#) Mass: 32864 Score: 107 Queries matched: 4  
Tax\_Id=10090 Gene\_Symbol=LOC100048867 similar to Annexin A2

---

75. [IPI00120030](#) Mass: 33673 Score: 104 Queries matched: 2 emPAI: 0.16  
Tax\_Id=10090 Gene\_Symbol=Crym Mu-crystallin homolog

Check to include this hit in error tolerant search or archive report

| Query                                                    | Observed | Mr(expt)  | Mr(calc)  | ppm  | Miss | Score | Expect   | Rank | Peptide                                                        |
|----------------------------------------------------------|----------|-----------|-----------|------|------|-------|----------|------|----------------------------------------------------------------|
| <input checked="" type="checkbox"/> <a href="#">3079</a> | 570.9683 | 1709.8831 | 1709.8737 | 5.55 | 0    | 68    | 2.8e-005 | 1    | <a href="#">R_APAFLSAEEVQDHLR</a> .S + Dimethyl (N-term)       |
| <input checked="" type="checkbox"/> <a href="#">3090</a> | 572.3100 | 1713.9082 | 1713.8988 | 5.48 | 0    | (68)  | 3.3e-005 | 1    | <a href="#">R_APAFLSAEEVQDHLR</a> .S + Dimethyl:2H(4) (N-term) |

---

76. [IPI00874728](#) Mass: 32995 Score: 103 Queries matched: 7 emPAI: 0.57  
Tax\_Id=10090 Gene\_Symbol=Tpm2 Isoform 2 of Tropomyosin beta chain

Check to include this hit in error tolerant search or archive report

| Query                                                    | Observed | Mr(expt)  | Mr(calc)  | ppm  | Miss | Score | Expect  | Rank | Peptide                                                                                |
|----------------------------------------------------------|----------|-----------|-----------|------|------|-------|---------|------|----------------------------------------------------------------------------------------|
| <input checked="" type="checkbox"/> <a href="#">1465</a> | 391.2202 | 1170.6387 | 1170.6356 | 2.64 | 1    | 44    | 0.0058  | 1    | <a href="#">R_ARQLEELR</a> .T + Dimethyl (N-term)                                      |
| <a href="#">3173</a>                                     | 585.9825 | 1754.9257 | 1754.9162 | 5.41 | 1    | (38)  | 0.036   | 1    | <a href="#">R_IQLVEEELDRAQER</a> .L + Dimethyl (N-term)                                |
| <a href="#">3186</a>                                     | 587.3243 | 1758.9512 | 1758.9413 | 5.60 | 1    | 56    | 0.00069 | 1    | <a href="#">R_IQLVEEELDRAQER</a> .L + Dimethyl:2H(4) (N-term)                          |
| <a href="#">3562</a>                                     | 638.0165 | 1911.0277 | 1911.0173 | 5.44 | 2    | 31    | 0.21    | 1    | <a href="#">R_RIQLVEEELDRAQER</a> .L + Dimethyl (N-term)                               |
| <a href="#">4117</a>                                     | 565.3049 | 2257.1904 | 2257.1801 | 4.56 | 2    | (34)  | 0.087   | 1    | <a href="#">R_LATALQKLEEAKEADESER</a> .G + Dimethyl (K); Dimethyl (N-term)             |
| <a href="#">4125</a>                                     | 567.3176 | 2265.2414 | 2265.2303 | 4.90 | 2    | (32)  | 0.14    | 1    | <a href="#">R_LATALQKLEEAKEADESER</a> .G + Dimethyl:2H(4) (K); Dimethyl:2H(4) (N-term) |
| <a href="#">4126</a>                                     | 567.3177 | 2265.2417 | 2265.2303 | 5.04 | 2    | 47    | 0.0048  | 1    | <a href="#">R_LATALQKLEEAKEADESER</a> .G + Dimethyl:2H(4) (K); Dimethyl:2H(4) (N-term) |

Proteins matching the same set of peptides:

[IPI00227918](#) Mass: 35175 Score: 103 Queries matched: 7  
Tax\_Id=10090 Gene\_Symbol=Tpm2 Tpm2 protein

---

77. [IPI00114945](#) Mass: 41727 Score: 99 Queries matched: 3 emPAI: 0.13  
Tax\_Id=10090 Gene\_Symbol=Sept2 Septin-2

Check to include this hit in error tolerant search or archive report

| Query                                                    | Observed | Mr(expt)  | Mr(calc)  | ppm  | Miss | Score | Expect   | Rank | Peptide                                                                             |
|----------------------------------------------------------|----------|-----------|-----------|------|------|-------|----------|------|-------------------------------------------------------------------------------------|
| <input checked="" type="checkbox"/> <a href="#">3298</a> | 606.0162 | 1815.0267 | 1815.0142 | 6.90 | 0    | (60)  | 0.0002   | 1    | <a href="#">K_ASIPFSVVGSNQLEAK</a> .G + Dimethyl (K); Dimethyl (N-term)             |
| <input checked="" type="checkbox"/> <a href="#">3299</a> | 606.0162 | 1815.0267 | 1815.0142 | 6.91 | 0    | 68    | 3.6e-005 | 1    | <a href="#">K_ASIPFSVVGSNQLEAK</a> .G + Dimethyl (K); Dimethyl (N-term)             |
| <input checked="" type="checkbox"/> <a href="#">3332</a> | 608.6996 | 1823.0771 | 1823.0644 | 6.96 | 0    | (42)  | 0.008    | 1    | <a href="#">K_ASIPFSVVGSNQLEAK</a> .G + Dimethyl:2H(4) (K); Dimethyl:2H(4) (N-term) |

78. [IPI00377592](#) Mass: 145123 Score: 99 Queries matched: 3 emPAI: 0.05  
Tax\_Id=10090 Gene\_Symbol=Sec31a SEC31-like 1

Check to include this hit in error tolerant search or archive report

| Query                                                    | Observed | Mr(expt)  | Mr(calc)  | ppm  | Miss | Score | Expect   | Rank | Peptide                                                                                                      |
|----------------------------------------------------------|----------|-----------|-----------|------|------|-------|----------|------|--------------------------------------------------------------------------------------------------------------|
| <input checked="" type="checkbox"/> <a href="#">2545</a> | 373.4477 | 1489.7618 | 1489.7572 | 3.06 | 0    | 52    | 0.00094  | 1    | <a href="#">K</a> <a href="#">_GRPGPVAGHSQMPR.V</a> + Dimethyl (N-term); Oxidation (M)                       |
| <input checked="" type="checkbox"/> <a href="#">2558</a> | 374.4540 | 1493.7867 | 1493.7823 | 2.94 | 0    | (36)  | 0.041    | 1    | <a href="#">K</a> <a href="#">_GRPGPVAGHSQMPR.V</a> + Dimethyl:2H(4) (N-term); Oxidation (M)                 |
| <input checked="" type="checkbox"/> <a href="#">4369</a> | 646.8604 | 2583.4125 | 2583.4046 | 3.08 | 1    | 70    | 1.9e-005 | 1    | <a href="#">K</a> <a href="#">_AQGKPVSGQESSQSPYERQPLSK.G</a> + 2 Dimethyl:2H(4) (K); Dimethyl:2H(4) (N-term) |

Proteins matching the same set of peptides:

[IPI00807797](#) Mass: 38332 Score: 99 Queries matched: 3

Tax\_Id=10090 Gene\_Symbol=Sec31a Sec31a protein

[IPI00853859](#) Mass: 130509 Score: 99 Queries matched: 3

Tax\_Id=10090 Gene\_Symbol=Sec31a Isoform 2 of Protein transport protein Sec31A

79. [IPI00123494](#) Mass: 100937 Score: 99 Queries matched: 2 emPAI: 0.05  
Tax\_Id=10090 Gene\_Symbol=Psm2 26S proteasome non-ATPase regulatory subunit 2

Check to include this hit in error tolerant search or archive report

| Query                                                    | Observed | Mr(expt)  | Mr(calc)  | ppm  | Miss | Score | Expect   | Rank | Peptide                                                                                              |
|----------------------------------------------------------|----------|-----------|-----------|------|------|-------|----------|------|------------------------------------------------------------------------------------------------------|
| <input checked="" type="checkbox"/> <a href="#">2679</a> | 512.9770 | 1535.9091 | 1535.9035 | 3.65 | 0    | 68    | 2.5e-005 | 1    | <a href="#">R</a> <a href="#">_VGQAVDVVGQAGKPK.T</a> + 2 Dimethyl (K); Dimethyl (N-term)             |
| <input checked="" type="checkbox"/> <a href="#">2708</a> | 517.0018 | 1547.9837 | 1547.9789 | 3.09 | 0    | (61)  | 5.9e-005 | 1    | <a href="#">R</a> <a href="#">_VGQAVDVVGQAGKPK.T</a> + 2 Dimethyl:2H(4) (K); Dimethyl:2H(4) (N-term) |

80. [IPI00653931](#) Mass: 46488 Score: 99 Queries matched: 1 emPAI: 0.06

Tax\_Id=10090 Gene\_Symbol=Fah Visual cortex cDNA, RIKEN full-length enriched library, clone:K430330E02 product:fumarylacetoacetate hydrolase, full insert sequence

Check to include this hit in error tolerant search or archive report

| Query                                                    | Observed | Mr(expt)  | Mr(calc)  | ppm  | Miss | Score | Expect   | Rank | Peptide                                                                |
|----------------------------------------------------------|----------|-----------|-----------|------|------|-------|----------|------|------------------------------------------------------------------------|
| <input checked="" type="checkbox"/> <a href="#">2218</a> | 693.8935 | 1385.7724 | 1385.7626 | 7.07 | 0    | 99    | 2.8e-008 | 1    | <a href="#">R</a> <a href="#">_ASLQNLLSASQAR.L</a> + Dimethyl (N-term) |

Proteins matching the same set of peptides:

[IPI00856685](#) Mass: 15678 Score: 99 Queries matched: 1

Tax\_Id=10090 Gene\_Symbol=Fah 16 kDa protein

[IPI00310035](#) Mass: 46416 Score: 99 Queries matched: 1

Tax\_Id=10090 Gene\_Symbol=Fah Fumarylacetoacetase

81. [IPI00230212](#) Mass: 26067 Score: 97 Queries matched: 6 emPAI: 0.46  
Tax\_Id=10090 Gene\_Symbol=Gstml1 Glutathione S-transferase Mu 1

Check to include this hit in error tolerant search or archive report

| Query                                                    | Observed | Mr(expt)  | Mr(calc)  | ppm  | Miss | Score | Expect | Rank | Peptide                                                                                      |
|----------------------------------------------------------|----------|-----------|-----------|------|------|-------|--------|------|----------------------------------------------------------------------------------------------|
| <input checked="" type="checkbox"/> <a href="#">1158</a> | 524.3284 | 1046.6423 | 1046.6386 | 3.56 | 0    | 32    | 0.11   | 1    | <a href="#">K</a> <a href="#">_ITQSNAILR.Y</a> + Dimethyl:2H(4) (N-term)                     |
| <input checked="" type="checkbox"/> <a href="#">1264</a> | 548.3287 | 1094.6429 | 1094.6376 | 4.89 | 0    | (28)  | 0.29   | 1    | <a href="#">R</a> <a href="#">_YIATPIFSK.M</a> + Dimethyl (K); Dimethyl (N-term)             |
| <input checked="" type="checkbox"/> <a href="#">1290</a> | 552.3539 | 1102.6932 | 1102.6878 | 4.92 | 0    | 33    | 0.11   | 1    | <a href="#">R</a> <a href="#">_YIATPIFSK.M</a> + Dimethyl:2H(4) (K); Dimethyl:2H(4) (N-term) |
| <input checked="" type="checkbox"/> <a href="#">2321</a> | 711.8669 | 1421.7192 | 1421.7122 | 4.91 | 0    | 63    | 7e-005 | 1    | <a href="#">R</a> <a href="#">_ADIVENQVMDTR.M</a> + Dimethyl:2H(4) (N-term)                  |

- [3619](#) 655.0475 1962.1207 1962.1066 7.19 0 (45) 0.0067 1 [K\\_LGLDFPNLPYLIDGSHK.I](#) + Dimethyl:2H(4) (K); Dimethyl:2H(4) (N-term)
- [3620](#) 655.0476 1962.1210 1962.1066 7.33 0 49 0.0024 1 [K\\_LGLDFPNLPYLIDGSHK.I](#) + Dimethyl:2H(4) (K); Dimethyl:2H(4) (N-term)

Proteins matching the same set of peptides:

[IPI00649135](#) Mass: 28709 Score: 97 Queries matched: 6  
 Tax\_Id=10090 Gene\_Symbol=Gstml1 Glutathione S-transferase, mu 1

82. [IPI00459570](#) Mass: 28993 Score: 95 Queries matched: 7 emPAI: 0.67  
 Tax\_Id=10090 Gene\_Symbol=Tpm3 2 days neonate thymus thymic cells cDNA, RIKEN full-length enriched library, clone:C920030J24 product:tropomyosin 3, gamma, full inse
- Check to include this hit in error tolerant search or archive report

| Query                                                    | Observed | Mr(expt)  | Mr(calc)  | ppm  | Miss | Score | Expect  | Rank | Peptide                                                                               |
|----------------------------------------------------------|----------|-----------|-----------|------|------|-------|---------|------|---------------------------------------------------------------------------------------|
| <input checked="" type="checkbox"/> <a href="#">2748</a> | 524.6113 | 1570.8120 | 1570.8063 | 3.63 | 1    | 27    | 0.34    | 1    | <a href="#">R_AREQAEAEVASLNR.R</a> + Dimethyl (N-term)                                |
| <a href="#">3173</a>                                     | 585.9825 | 1754.9257 | 1754.9162 | 5.41 | 1    | (38)  | 0.036   | 1    | <a href="#">R_IQLVEEELDRAQER.L</a> + Dimethyl (N-term)                                |
| <a href="#">3186</a>                                     | 587.3243 | 1758.9512 | 1758.9413 | 5.60 | 1    | 56    | 0.00069 | 1    | <a href="#">R_IQLVEEELDRAQER.L</a> + Dimethyl:2H(4) (N-term)                          |
| <a href="#">3562</a>                                     | 638.0165 | 1911.0277 | 1911.0173 | 5.44 | 2    | 31    | 0.21    | 1    | <a href="#">R_RIQLVEEELDRAQER.L</a> + Dimethyl (N-term)                               |
| <a href="#">4117</a>                                     | 565.3049 | 2257.1904 | 2257.1801 | 4.56 | 2    | (34)  | 0.087   | 1    | <a href="#">R_LATALQKLEEAKEADESER.G</a> + Dimethyl (K); Dimethyl (N-term)             |
| <a href="#">4125</a>                                     | 567.3176 | 2265.2414 | 2265.2303 | 4.90 | 2    | (32)  | 0.14    | 1    | <a href="#">R_LATALQKLEEAKEADESER.G</a> + Dimethyl:2H(4) (K); Dimethyl:2H(4) (N-term) |
| <a href="#">4126</a>                                     | 567.3177 | 2265.2417 | 2265.2303 | 5.04 | 2    | 47    | 0.0048  | 1    | <a href="#">R_LATALQKLEEAKEADESER.G</a> + Dimethyl:2H(4) (K); Dimethyl:2H(4) (N-term) |

Proteins matching the same set of peptides:

[IPI00230044](#) Mass: 29231 Score: 95 Queries matched: 7  
 Tax\_Id=10090 Gene\_Symbol=Tpm3 Isoform 2 of Tropomyosin alpha-3 chain

83. [IPI00129107](#) Mass: 36221 Score: 91 Queries matched: 2 emPAI: 0.15  
 Tax\_Id=10090 Gene\_Symbol=Gipcl1 PDZ domain-containing protein GIPCL1
- Check to include this hit in error tolerant search or archive report

| Query                                                    | Observed | Mr(expt)  | Mr(calc)  | ppm  | Miss | Score | Expect  | Rank | Peptide                                                        |
|----------------------------------------------------------|----------|-----------|-----------|------|------|-------|---------|------|----------------------------------------------------------------|
| <input checked="" type="checkbox"/> <a href="#">2471</a> | 488.5845 | 1462.7316 | 1462.7277 | 2.65 | 0    | 60    | 0.00013 | 1    | <a href="#">R_SAGGHPGSGPQLGTGR.G</a> + Dimethyl (N-term)       |
| <input checked="" type="checkbox"/> <a href="#">2477</a> | 489.9262 | 1466.7567 | 1466.7528 | 2.66 | 0    | (57)  | 0.00029 | 1    | <a href="#">R_SAGGHPGSGPQLGTGR.G</a> + Dimethyl:2H(4) (N-term) |

84. [IPI00309768](#) Mass: 36208 Score: 89 Queries matched: 2 emPAI: 0.15  
 Tax\_Id=10090 Gene\_Symbol=Pdlim1 PDZ and LIM domain protein 1
- Check to include this hit in error tolerant search or archive report

| Query                                                    | Observed | Mr(expt)  | Mr(calc)  | ppm  | Miss | Score | Expect   | Rank | Peptide                                                               |
|----------------------------------------------------------|----------|-----------|-----------|------|------|-------|----------|------|-----------------------------------------------------------------------|
| <input checked="" type="checkbox"/> <a href="#">2420</a> | 724.8666 | 1447.7187 | 1447.7129 | 4.00 | 0    | 71    | 8.9e-006 | 1    | <a href="#">R_SAMPFTASPAPSTR.V</a> + Dimethyl (N-term)                |
| <input checked="" type="checkbox"/> <a href="#">3029</a> | 562.6599 | 1684.9577 | 1684.9512 | 3.88 | 1    | 44    | 0.0091   | 1    | <a href="#">R_LVGGKDFEQPLAISR.V</a> + Dimethyl (K); Dimethyl (N-term) |

85. [IPI00457659](#) Mass: 42719 Score: 88 Queries matched: 2 emPAI: 0.12  
 Tax\_Id=10090 Gene\_Symbol=Serpina1 Leukocyte elastase inhibitor A
- Check to include this hit in error tolerant search or archive report

| Query | Observed | Mr(expt) | Mr(calc) | ppm | Miss | Score | Expect | Rank | Peptide |
|-------|----------|----------|----------|-----|------|-------|--------|------|---------|
|-------|----------|----------|----------|-----|------|-------|--------|------|---------|

- [1827](#) 622.8746 1243.7347 1243.7264 6.70 0 71 1.5e-005 1 R\_LGVQDLFSSSK.A + Dimethyl:2H(4) (K); Dimethyl:2H(4) (N-term)
- [2075](#) 445.5872 1333.7399 1333.7354 3.42 1 49 0.0028 1 R\_FQSLNAEVSKR.G + Dimethyl (K); Dimethyl (N-term)

Proteins matching the same set of peptides:

[IPI00515459](#) Mass: 39195 Score: 88 Queries matched: 2  
 Tax\_Id=10090 Gene\_Symbol=Serpinbla 39 kDa protein

86. [IPI00111265](#) Mass: 33118 Score: 88 Queries matched: 4 emPAI: 0.25  
 Tax\_Id=10090 Gene\_Symbol=Capza2 F-actin-capping protein subunit alpha-2

Check to include this hit in error tolerant search or archive report

| Query                                                    | Observed | Mr(expt)  | Mr(calc)  | ppm  | Miss | Score | Expect | Rank | Peptide                                          |
|----------------------------------------------------------|----------|-----------|-----------|------|------|-------|--------|------|--------------------------------------------------|
| <input checked="" type="checkbox"/> <a href="#">1704</a> | 613.3706 | 1224.7267 | 1224.7190 | 6.32 | 0    | 47    | 0.0033 | 1    | R_LLLNNDNLLR.E + Dimethyl (N-term)               |
| <input checked="" type="checkbox"/> <a href="#">1752</a> | 615.3832 | 1228.7518 | 1228.7441 | 6.27 | 0    | (33)  | 0.064  | 1    | R_LLLNNDNLLR.E + Dimethyl:2H(4) (N-term)         |
| <input checked="" type="checkbox"/> <a href="#">3933</a> | 711.7128 | 2132.1165 | 2132.0993 | 8.06 | 0    | 53    | 0.0011 | 1    | K_FIIHAPPGEFNEVFNDVR.L + Dimethyl:2H(4) (N-term) |
| <input checked="" type="checkbox"/> <a href="#">3934</a> | 711.7129 | 2132.1167 | 2132.0993 | 8.18 | 0    | (43)  | 0.011  | 1    | K_FIIHAPPGEFNEVFNDVR.L + Dimethyl:2H(4) (N-term) |

Proteins matching the same set of peptides:

[IPI00857651](#) Mass: 19660 Score: 88 Queries matched: 4  
 Tax\_Id=10090 Gene\_Symbol=Capza2 20 kDa protein

87. [IPI00133605](#) Mass: 62612 Score: 87 Queries matched: 2 emPAI: 0.08  
 Tax\_Id=10090 Gene\_Symbol=Pklr Pyruvate kinase isozymes R/L

Check to include this hit in error tolerant search or archive report

| Query                                                    | Observed | Mr(expt)  | Mr(calc)  | ppm  | Miss | Score | Expect  | Rank | Peptide                                                       |
|----------------------------------------------------------|----------|-----------|-----------|------|------|-------|---------|------|---------------------------------------------------------------|
| <input checked="" type="checkbox"/> <a href="#">1570</a> | 599.3438 | 1196.6731 | 1196.6652 | 6.56 | 0    | 61    | 0.00015 | 1    | R_GDLGIEIPAEK.V + Dimethyl (K); Dimethyl (N-term)             |
| <input checked="" type="checkbox"/> <a href="#">1602</a> | 603.3688 | 1204.7230 | 1204.7155 | 6.26 | 0    | (55)  | 0.00059 | 1    | R_GDLGIEIPAEK.V + Dimethyl:2H(4) (K); Dimethyl:2H(4) (N-term) |

Proteins matching the same set of peptides:

[IPI00407130](#) Mass: 58378 Score: 87 Queries matched: 2  
 Tax\_Id=10090 Gene\_Symbol=Pkm2 Isoform M2 of Pyruvate kinase isozymes M1/M2  
[IPI00775829](#) Mass: 59126 Score: 87 Queries matched: 2  
 Tax\_Id=10090 Gene\_Symbol=Pklr pyruvate kinase liver and red blood cell isoform 2  
[IPI00845840](#) Mass: 58461 Score: 87 Queries matched: 2  
 Tax\_Id=10090 Gene\_Symbol=Pkm2 Isoform M1 of Pyruvate kinase isozymes M1/M2

88. [IPI00776343](#) Mass: 42969 Score: 86 Queries matched: 6 emPAI: 0.34  
 Tax\_Id=10090 Gene\_Symbol=Ager RAGE

Check to include this hit in error tolerant search or archive report

| Query                                                    | Observed | Mr(expt)  | Mr(calc)  | ppm  | Miss | Score | Expect | Rank | Peptide                                                       |
|----------------------------------------------------------|----------|-----------|-----------|------|------|-------|--------|------|---------------------------------------------------------------|
| <input checked="" type="checkbox"/> <a href="#">1803</a> | 413.2496 | 1236.7270 | 1236.7230 | 3.21 | 0    | 33    | 0.081  | 1    | K_KPPQQLEWK.L + 2 Dimethyl (K); Dimethyl (N-term)             |
| <input checked="" type="checkbox"/> <a href="#">1837</a> | 417.2748 | 1248.8027 | 1248.7984 | 3.47 | 0    | (32)  | 0.056  | 1    | K_KPPQQLEWK.L + 2 Dimethyl:2H(4) (K); Dimethyl:2H(4) (N-term) |
| <input checked="" type="checkbox"/> <a href="#">2470</a> | 488.3052 | 1461.8937 | 1461.8892 | 3.11 | 1    | 37    | 0.026  | 1    | R_RRPLNTAPIQLR.V + Dimethyl (N-term)                          |
| <input checked="" type="checkbox"/> <a href="#">2475</a> | 489.6470 | 1465.9193 | 1465.9143 | 3.40 | 1    | (27)  | 0.18   | 1    | R_RRPLNTAPIQLR.V + Dimethyl:2H(4) (N-term)                    |

[2563](#) 748.9008 1495.7871 1495.7783 5.85 0 (51) 0.0014 1 K\_VLSPQGGPWDSVAR.I + Dimethyl (N-term)  
 [2575](#) 750.9150 1499.8154 1499.8035 7.97 0 58 0.00033 1 K\_VLSPQGGPWDSVAR.I + Dimethyl:2H(4) (N-term)

---

89. [IPI00408119](#) Mass: 117927 Score: 85 Queries matched: 7 emPAI: 0.14

Tax\_Id=10090 Gene\_Symbol=Mtap4 Isoform 1 of Microtubule-associated protein 4

Check to include this hit in error tolerant search or archive report

| Query                                                    | Observed | Mr(expt)  | Mr(calc)  | ppm  | Miss | Score | Expect | Rank | Peptide                                                                |
|----------------------------------------------------------|----------|-----------|-----------|------|------|-------|--------|------|------------------------------------------------------------------------|
| <input checked="" type="checkbox"/> <a href="#">1116</a> | 346.2198 | 1035.6374 | 1035.6350 | 2.32 | 0    | 47    | 0.0031 | 1    | R_VKPMSAPSR.S + Dimethyl:2H(4) (K); Dimethyl:2H(4) (N-term)            |
| <input checked="" type="checkbox"/> <a href="#">1469</a> | 586.3530 | 1170.6914 | 1170.6860 | 4.62 | 0    | (42)  | 0.01   | 1    | R_LATTVSAPDLK.S + Dimethyl (K); Dimethyl (N-term)                      |
| <input checked="" type="checkbox"/> <a href="#">1519</a> | 590.3781 | 1178.7416 | 1178.7362 | 4.54 | 0    | 48    | 0.0016 | 1    | R_LATTVSAPDLK.S + Dimethyl:2H(4) (K); Dimethyl:2H(4) (N-term)          |
| <input checked="" type="checkbox"/> <a href="#">3219</a> | 445.2937 | 1777.1458 | 1777.1404 | 3.03 | 0    | 28    | 0.046  | 1    | R_TSPSKPSSAPALKPGPK.T + 3 Dimethyl:2H(4) (K); Dimethyl:2H(4) (N-term)  |
| <input checked="" type="checkbox"/> <a href="#">3572</a> | 482.2796 | 1925.0892 | 1925.0833 | 3.06 | 1    | (32)  | 0.12   | 1    | K_KTEAATTAGKPEPNAVTK.A + 3 Dimethyl (K); Dimethyl (N-term)             |
| <input checked="" type="checkbox"/> <a href="#">3598</a> | 486.3044 | 1941.1883 | 1941.1838 | 2.34 | 1    | (28)  | 0.095  | 1    | K_KTEAATTAGKPEPNAVTK.A + 3 Dimethyl:2H(4) (K); Dimethyl:2H(4) (N-term) |
| <input checked="" type="checkbox"/> <a href="#">3599</a> | 486.3045 | 1941.1887 | 1941.1838 | 2.55 | 1    | 33    | 0.032  | 1    | K_KTEAATTAGKPEPNAVTK.A + 3 Dimethyl:2H(4) (K); Dimethyl:2H(4) (N-term) |

Proteins matching the same set of peptides:

[IPI00848818](#) Mass: 117940 Score: 85 Queries matched: 7

Tax\_Id=10090 Gene\_Symbol=Mtap4 microtubule-associated protein 4

---

90. [IPI00421206](#) Mass: 36155 Score: 85 Queries matched: 2 emPAI: 0.15

Tax\_Id=10090 Gene\_Symbol=Kctd12 BTB/POZ domain-containing protein KCTD12

Check to include this hit in error tolerant search or archive report

| Query                                                    | Observed | Mr(expt)  | Mr(calc)  | ppm  | Miss | Score | Expect  | Rank | Peptide                                        |
|----------------------------------------------------------|----------|-----------|-----------|------|------|-------|---------|------|------------------------------------------------|
| <input checked="" type="checkbox"/> <a href="#">3098</a> | 573.3112 | 1716.9117 | 1716.9060 | 3.34 | 0    | 61    | 0.00019 | 1    | R_LGAPQQPGPGPPPHSR.R + Dimethyl (N-term)       |
| <input checked="" type="checkbox"/> <a href="#">3105</a> | 574.6531 | 1720.9374 | 1720.9311 | 3.66 | 0    | (56)  | 0.00055 | 1    | R_LGAPQQPGPGPPPHSR.R + Dimethyl:2H(4) (N-term) |

---

91. [IPI00459725](#) Mass: 40069 Score: 84 Queries matched: 2 emPAI: 0.13

Tax\_Id=10090 Gene\_Symbol=Idh3a Isoform 1 of Isocitrate dehydrogenase [NAD] subunit alpha, mitochondrial precursor

Check to include this hit in error tolerant search or archive report

| Query                                                    | Observed | Mr(expt)  | Mr(calc)  | ppm  | Miss | Score | Expect  | Rank | Peptide                                                      |
|----------------------------------------------------------|----------|-----------|-----------|------|------|-------|---------|------|--------------------------------------------------------------|
| <input checked="" type="checkbox"/> <a href="#">1271</a> | 549.3213 | 1096.6281 | 1096.6241 | 3.73 | 0    | (55)  | 0.00057 | 1    | R_NVTAIQGGGK.W + Dimethyl (K); Dimethyl (N-term)             |
| <input checked="" type="checkbox"/> <a href="#">1300</a> | 553.3464 | 1104.6782 | 1104.6743 | 3.54 | 0    | 57    | 0.00037 | 1    | R_NVTAIQGGGK.W + Dimethyl:2H(4) (K); Dimethyl:2H(4) (N-term) |

---

92. [IPI00467447](#) Mass: 189437 Score: 84 Queries matched: 6 emPAI: 0.07

Tax\_Id=10090 Gene\_Symbol=Iqgap1 Ras GTPase-activating-like protein IQGAP1

Check to include this hit in error tolerant search or archive report

| Query                                                   | Observed | Mr(expt) | Mr(calc) | ppm  | Miss | Score | Expect | Rank | Peptide                                                    |
|---------------------------------------------------------|----------|----------|----------|------|------|-------|--------|------|------------------------------------------------------------|
| <input checked="" type="checkbox"/> <a href="#">716</a> | 430.3011 | 858.5877 | 858.5840 | 4.31 | 0    | 42    | 0.0056 | 1    | R_LIVDVIR.F + Dimethyl:2H(4) (N-term)                      |
| <input checked="" type="checkbox"/> <a href="#">898</a> | 483.2787 | 964.5428 | 964.5382 | 4.80 | 0    | 32    | 0.085  | 1    | K_LGNFFSPK.V + Dimethyl (K); Dimethyl (N-term)             |
| <input checked="" type="checkbox"/> <a href="#">918</a> | 487.3038 | 972.5931 | 972.5884 | 4.82 | 0    | (27)  | 0.32   | 1    | K_LGNFFSPK.V + Dimethyl:2H(4) (K); Dimethyl:2H(4) (N-term) |

|                                     |                      |          |           |           |      |   |      |          |   |                                                                           |
|-------------------------------------|----------------------|----------|-----------|-----------|------|---|------|----------|---|---------------------------------------------------------------------------|
| <input checked="" type="checkbox"/> | <a href="#">1959</a> | 433.9186 | 1298.7340 | 1298.7306 | 2.60 | 1 | (32) | 0.12     | 1 | K <sub>2</sub> QLQSDLQQKR.Q + Dimethyl (K); Dimethyl (N-term)             |
| <input checked="" type="checkbox"/> | <a href="#">1990</a> | 436.6021 | 1306.7845 | 1306.7809 | 2.79 | 1 | 33   | 0.092    | 1 | K <sub>2</sub> QLQSDLQQKR.Q + Dimethyl:2H(4) (K); Dimethyl:2H(4) (N-term) |
| <input checked="" type="checkbox"/> | <a href="#">3568</a> | 641.6793 | 1922.0161 | 1922.0047 | 5.94 | 0 | 67   | 4.6e-005 | 1 | R <sub>2</sub> FALGISAINAEVDSGDVGR.T + Dimethyl:2H(4) (N-term)            |

93. [IPI00187462](#) Mass: 38362 Score: 83 Queries matched: 4 emPAI: 0.22

Tax\_Id=10090 Gene\_Symbol=Gimap4 GTPase, IMAP family member 4 isoform a

Check to include this hit in error tolerant search or archive report

| Query                               | Observed             | Mr(expt) | Mr(calc)  | ppm       | Miss | Score | Expect | Rank    | Peptide |                                                                 |
|-------------------------------------|----------------------|----------|-----------|-----------|------|-------|--------|---------|---------|-----------------------------------------------------------------|
| <input checked="" type="checkbox"/> | <a href="#">3246</a> | 602.9778 | 1805.9117 | 1805.9020 | 5.38 | 0     | 41     | 0.014   | 1       | R <sub>2</sub> SSHELGNQDQGIPQLR.I + Dimethyl (N-term)           |
| <input checked="" type="checkbox"/> | <a href="#">3278</a> | 604.3193 | 1809.9362 | 1809.9271 | 5.00 | 0     | (29)   | 0.25    | 1       | R <sub>2</sub> SSHELGNQDQGIPQLR.I + Dimethyl:2H(4) (N-term)     |
| <input checked="" type="checkbox"/> | <a href="#">3915</a> | 702.4355 | 2104.2846 | 2104.2710 | 6.45 | 0     | 48     | 0.00086 | 1       | R <sub>2</sub> YVALTSPGPHALLLVVPLGR.Y + Dimethyl:2H(4) (N-term) |
| <input checked="" type="checkbox"/> | <a href="#">3916</a> | 702.4355 | 2104.2847 | 2104.2710 | 6.50 | 0     | (43)   | 0.0024  | 1       | R <sub>2</sub> YVALTSPGPHALLLVVPLGR.Y + Dimethyl:2H(4) (N-term) |

Proteins matching the same set of peptides:

[IPI00754464](#) Mass: 24767 Score: 83 Queries matched: 4

Tax\_Id=10090 Gene\_Symbol=Gimap4 GTPase IMAP family member 4

94. [IPI00420806](#) Mass: 54469 Score: 83 Queries matched: 2 emPAI: 0.10

Tax\_Id=10090 Gene\_Symbol=Dync1li2 Cytoplasmic dynein 1 light intermediate chain 2

Check to include this hit in error tolerant search or archive report

| Query                               | Observed             | Mr(expt) | Mr(calc)  | ppm       | Miss | Score | Expect | Rank     | Peptide |                                                                                     |
|-------------------------------------|----------------------|----------|-----------|-----------|------|-------|--------|----------|---------|-------------------------------------------------------------------------------------|
| <input checked="" type="checkbox"/> | <a href="#">3069</a> | 567.6460 | 1699.9162 | 1699.9105 | 3.35 | 1     | (47)   | 0.0046   | 1       | K <sub>2</sub> KTGSPGSPSAGGVQSTAK.K + 2 Dimethyl (K); Dimethyl (N-term)             |
| <input checked="" type="checkbox"/> | <a href="#">3086</a> | 571.6711 | 1711.9914 | 1711.9858 | 3.27 | 1     | 68     | 2.6e-005 | 1       | K <sub>2</sub> KTGSPGSPSAGGVQSTAK.K + 2 Dimethyl:2H(4) (K); Dimethyl:2H(4) (N-term) |

95. [IPI00118875](#) Mass: 73513 Score: 81 Queries matched: 3 emPAI: 0.11

Tax\_Id=10090 Gene\_Symbol=Eef1d eukaryotic translation elongation factor 1 delta isoform a

Check to include this hit in error tolerant search or archive report

| Query                               | Observed             | Mr(expt) | Mr(calc)  | ppm       | Miss | Score | Expect | Rank    | Peptide |                                                                         |
|-------------------------------------|----------------------|----------|-----------|-----------|------|-------|--------|---------|---------|-------------------------------------------------------------------------|
| <input checked="" type="checkbox"/> | <a href="#">2452</a> | 485.9286 | 1454.7640 | 1454.7602 | 2.63 | 0     | (40)   | 0.017   | 1       | R <sub>2</sub> ATAPQTQHVSPMR.Q + Dimethyl:2H(4) (N-term)                |
| <input checked="" type="checkbox"/> | <a href="#">2476</a> | 489.9185 | 1466.7337 | 1466.7300 | 2.54 | 0     | 52     | 0.00073 | 1       | R <sub>2</sub> ATAPQTQHVSPMR.Q + Dimethyl (N-term); Oxidation (M)       |
| <input checked="" type="checkbox"/> | <a href="#">2497</a> | 491.2603 | 1470.7591 | 1470.7551 | 2.72 | 0     | (43)   | 0.0086  | 1       | R <sub>2</sub> ATAPQTQHVSPMR.Q + Dimethyl:2H(4) (N-term); Oxidation (M) |

Proteins matching the same set of peptides:

[IPI00468771](#) Mass: 30730 Score: 81 Queries matched: 3

Tax\_Id=10090 Gene\_Symbol=Eef1d Eef1d protein

[IPI00515654](#) Mass: 31387 Score: 81 Queries matched: 3

Tax\_Id=10090 Gene\_Symbol=Eef1d eukaryotic translation elongation factor 1 delta isoform b

[IPI00620302](#) Mass: 28826 Score: 81 Queries matched: 3

Tax\_Id=10090 Gene\_Symbol=Eef1d Isoform 2 of Elongation factor 1-delta

[IPI00831082](#) Mass: 23158 Score: 81 Queries matched: 3

Tax\_Id=10090 Gene\_Symbol=Eef1d 23 kDa protein

[IPI00831202](#) Mass: 15722 Score: 81 Queries matched: 3



Tax\_Id=10090 Gene\_Symbol=Eef1d 16 kDa protein  
[IPI00831299](#) Mass: 13160 Score: 81 Queries matched: 3  
Tax\_Id=10090 Gene\_Symbol=Eef1d 13 kDa protein

96. [IPI00229510](#) Mass: 36834 Score: 81 Queries matched: 2 emPAI: 0.15

Tax\_Id=10090 Gene\_Symbol=Ldhb L-lactate dehydrogenase B chain

Check to include this hit in error tolerant search or archive report

| Query                                                    | Observed | Mr(expt)  | Mr(calc)  | ppm  | Miss | Score | Expect  | Rank | Peptide                                                     |
|----------------------------------------------------------|----------|-----------|-----------|------|------|-------|---------|------|-------------------------------------------------------------|
| <input checked="" type="checkbox"/> <a href="#">1059</a> | 508.3129 | 1014.6112 | 1014.6073 | 3.80 | 0    | (57)  | 0.00036 | 1    | R_GLTSVINQK.L + Dimethyl (K); Dimethyl (N-term)             |
| <input checked="" type="checkbox"/> <a href="#">1072</a> | 512.3378 | 1022.6610 | 1022.6576 | 3.35 | 0    | 58    | 0.00022 | 1    | R_GLTSVINQK.L + Dimethyl:2H(4) (K); Dimethyl:2H(4) (N-term) |

Proteins matching the same set of peptides:

[IPI00280156](#) Mass: 36959 Score: 81 Queries matched: 2  
Tax\_Id=10090 Gene\_Symbol=EG433229 hypothetical protein isoform 7

97. [IPI00138342](#) Mass: 61418 Score: 74 Queries matched: 2 emPAI: 0.09

Tax\_Id=10090 Gene\_Symbol=Esl Liver carboxylesterase N precursor

Check to include this hit in error tolerant search or archive report

| Query                                                    | Observed | Mr(expt)  | Mr(calc)  | ppm  | Miss | Score | Expect  | Rank | Peptide                                                                             |
|----------------------------------------------------------|----------|-----------|-----------|------|------|-------|---------|------|-------------------------------------------------------------------------------------|
| <input checked="" type="checkbox"/> <a href="#">4668</a> | 939.2121 | 3752.8193 | 3752.7819 | 9.97 | 1    | 57    | 0.00031 | 1    | R_NGNPNGEGLPHWPEYDEKEGYLQIGATTQQAQR.L + Dimethyl (K); Dimethyl (N-term)             |
| <input checked="" type="checkbox"/> <a href="#">4672</a> | 941.2208 | 3760.8542 | 3760.8321 | 5.87 | 1    | (50)  | 0.0017  | 1    | R_NGNPNGEGLPHWPEYDEKEGYLQIGATTQQAQR.L + Dimethyl:2H(4) (K); Dimethyl:2H(4) (N-term) |

Proteins matching the same set of peptides:

[IPI00831484](#) Mass: 62500 Score: 74 Queries matched: 2  
Tax\_Id=10090 Gene\_Symbol=LOC382044 liver carboxylesterase N-like

98. [IPI00119111](#) Mass: 36577 Score: 74 Queries matched: 4 emPAI: 0.23

Tax\_Id=10090 Gene\_Symbol=Cnn3 Calponin-3

Check to include this hit in error tolerant search or archive report

| Query                                                    | Observed | Mr(expt)  | Mr(calc)  | ppm  | Miss | Score | Expect  | Rank | Peptide                                                       |
|----------------------------------------------------------|----------|-----------|-----------|------|------|-------|---------|------|---------------------------------------------------------------|
| <input checked="" type="checkbox"/> <a href="#">1442</a> | 582.3228 | 1162.6310 | 1162.6234 | 6.52 | 0    | 40    | 0.018   | 1    | K_GPSYGLSAEVK.N + Dimethyl (K); Dimethyl (N-term)             |
| <input checked="" type="checkbox"/> <a href="#">1467</a> | 586.3474 | 1170.6803 | 1170.6736 | 5.70 | 0    | (26)  | 0.48    | 1    | K_GPSYGLSAEVK.N + Dimethyl:2H(4) (K); Dimethyl:2H(4) (N-term) |
| <input checked="" type="checkbox"/> <a href="#">2299</a> | 472.9185 | 1415.7337 | 1415.7303 | 2.41 | 1    | (39)  | 0.02    | 1    | K_GASQAGMLAPGTRR.D + Dimethyl (N-term); Oxidation (M)         |
| <input checked="" type="checkbox"/> <a href="#">2310</a> | 474.2603 | 1419.7592 | 1419.7554 | 2.65 | 1    | 53    | 0.00097 | 1    | K_GASQAGMLAPGTRR.D + Dimethyl:2H(4) (N-term); Oxidation (M)   |

99. [IPI00377351](#) Mass: 45001 Score: 74 Queries matched: 6 emPAI: 0.25

Tax\_Id=10090 Gene\_Symbol=Apoa4;ENSMUSG00000074373 Apolipoprotein A-IV precursor

Check to include this hit in error tolerant search or archive report

| Query                                                    | Observed | Mr(expt)  | Mr(calc)  | ppm  | Miss | Score | Expect  | Rank | Peptide                              |
|----------------------------------------------------------|----------|-----------|-----------|------|------|-------|---------|------|--------------------------------------|
| <input checked="" type="checkbox"/> <a href="#">1435</a> | 580.3486 | 1158.6827 | 1158.6761 | 5.74 | 0    | 32    | 0.11    | 1    | K_LQLTPYIQR.M + Dimethyl (N-term)    |
| <input checked="" type="checkbox"/> <a href="#">1865</a> | 630.3636 | 1258.7127 | 1258.7034 | 7.46 | 0    | 60    | 0.00017 | 1    | K_ALVQQLEQFR.Q + Dimethyl (N-term)   |
| <input checked="" type="checkbox"/> <a href="#">2498</a> | 491.2687 | 1470.7844 | 1470.7790 | 3.65 | 1    | (35)  | 0.066   | 1    | K_ATIDQNLEDLRR.S + Dimethyl (N-term) |

- [2513](#) 492.6105 1474.8097 1474.8041 3.76 1 39 0.029 1 [K\\_ATIDQNLEDLRR.S + Dimethyl:2H\(4\) \(N-term\)](#)
- [2541](#) 497.2655 1488.7746 1488.7685 4.11 1 29 0.21 1 [R\\_QLEQQVEEFRR.T + Dimethyl \(N-term\)](#)
- [2553](#) 498.6071 1492.7996 1492.7936 4.04 1 (28) 0.35 1 [R\\_QLEQQVEEFRR.T + Dimethyl:2H\(4\) \(N-term\)](#)

Proteins matching the same set of peptides:

[IPI00775913](#) Mass: 45001 Score: 74 Queries matched: 6  
 Tax\_Id=10090 Gene\_Symbol=Apoa4;ENSMUSG00000074373 apolipoprotein A-IV

100. [IPI00336362](#) Mass: 55009 Score: 74 Queries matched: 3 emPAI: 0.15  
 Tax\_Id=10090 Gene\_Symbol=Aldh1a7 Aldehyde dehydrogenase, cytosolic 1

Check to include this hit in error tolerant search or archive report

| Query                                                    | Observed | Mr(expt)  | Mr(calc)  | ppm  | Miss | Score | Expect  | Rank | Peptide                                                         |
|----------------------------------------------------------|----------|-----------|-----------|------|------|-------|---------|------|-----------------------------------------------------------------|
| <input checked="" type="checkbox"/> <a href="#">1651</a> | 609.3281 | 1216.6417 | 1216.6353 | 5.29 | 0    | 38    | 0.028   | 1    | <a href="#">R_QAFQIGSPWR.T + Dimethyl (N-term)</a>              |
| <input checked="" type="checkbox"/> <a href="#">1684</a> | 611.3406 | 1220.6667 | 1220.6604 | 5.18 | 0    | (33)  | 0.089   | 1    | <a href="#">R_QAFQIGSPWR.T + Dimethyl:2H(4) (N-term)</a>        |
| <input checked="" type="checkbox"/> <a href="#">3694</a> | 669.3423 | 2005.0050 | 2004.9917 | 6.62 | 0    | 53    | 0.00079 | 1    | <a href="#">K_GFFVQPTVFSNVTDEMR.I + Dimethyl:2H(4) (N-term)</a> |

Proteins matching the same set of peptides:

[IPI00626662](#) Mass: 55060 Score: 74 Queries matched: 3  
 Tax\_Id=10090 Gene\_Symbol=Aldh1a1 Retinal dehydrogenase 1

101. [IPI00317710](#) Mass: 95178 Score: 72 Queries matched: 1 emPAI: 0.03  
 Tax\_Id=10090 Gene\_Symbol=Hspa4l Isoform 1 of Heat shock 70 kDa protein 4L

Check to include this hit in error tolerant search or archive report

| Query                                                    | Observed | Mr(expt)  | Mr(calc)  | ppm  | Miss | Score | Expect   | Rank | Peptide                                                    |
|----------------------------------------------------------|----------|-----------|-----------|------|------|-------|----------|------|------------------------------------------------------------|
| <input checked="" type="checkbox"/> <a href="#">2328</a> | 712.4122 | 1422.8098 | 1422.8020 | 5.46 | 0    | 72    | 1.3e-005 | 1    | <a href="#">K_SIDLPIQSSLYR.Q + Dimethyl:2H(4) (N-term)</a> |

Proteins matching the same set of peptides:

[IPI00317711](#) Mass: 92935 Score: 72 Queries matched: 1  
 Tax\_Id=10090 Gene\_Symbol=Hspa4l Isoform 2 of Heat shock 70 kDa protein 4L  
[IPI00856856](#) Mass: 13575 Score: 72 Queries matched: 1  
 Tax\_Id=10090 Gene\_Symbol=Hspa4l Protein

102. [IPI00116074](#) Mass: 86151 Score: 71 Queries matched: 6 emPAI: 0.13  
 Tax\_Id=10090 Gene\_Symbol=Aco2 Aconitate hydratase, mitochondrial precursor

Check to include this hit in error tolerant search or archive report

| Query                                                    | Observed | Mr(expt)  | Mr(calc)  | ppm  | Miss | Score | Expect  | Rank | Peptide                                                                                |
|----------------------------------------------------------|----------|-----------|-----------|------|------|-------|---------|------|----------------------------------------------------------------------------------------|
| <input checked="" type="checkbox"/> <a href="#">508</a>  | 380.7537 | 759.4929  | 759.4905  | 3.20 | 0    | 26    | 0.32    | 1    | <a href="#">K_NINIVR.K + Dimethyl:2H(4) (N-term)</a>                                   |
| <input checked="" type="checkbox"/> <a href="#">1277</a> | 550.3081 | 1098.6017 | 1098.5971 | 4.19 | 0    | 27    | 0.25    | 1    | <a href="#">K_NTIVTSYNR.N + Dimethyl:2H(4) (N-term)</a>                                |
| <input checked="" type="checkbox"/> <a href="#">2560</a> | 748.4111 | 1494.8077 | 1494.7980 | 6.49 | 0    | 25    | 0.63    | 1    | <a href="#">K_SQFTITPGSEQIR.A + Dimethyl:2H(4) (N-term)</a>                            |
| <input checked="" type="checkbox"/> <a href="#">3545</a> | 634.3319 | 1899.9737 | 1899.9628 | 5.73 | 0    | 37    | 0.042   | 1    | <a href="#">K_IVYGHLDLDPANQEIER.G + Dimethyl:2H(4) (N-term)</a>                        |
| <input checked="" type="checkbox"/> <a href="#">3822</a> | 683.7342 | 2048.1807 | 2048.1695 | 5.46 | 1    | (31)  | 0.12    | 1    | <a href="#">R_AKDINQEVYNFLATAGAK.Y + 2 Dimethyl:2H(4) (K); Dimethyl:2H(4) (N-term)</a> |
| <input checked="" type="checkbox"/> <a href="#">3823</a> | 683.7343 | 2048.1809 | 2048.1695 | 5.56 | 1    | 57    | 0.00034 | 1    | <a href="#">R_AKDINQEVYNFLATAGAK.Y + 2 Dimethyl:2H(4) (K); Dimethyl:2H(4) (N-term)</a> |

---

103. [IPI00114017](#) Mass: 50192 Score: 71 Queries matched: 2 emPAI: 0.11  
Tax\_Id=10090 Gene\_Symbol=Anxa7 Annexin A7

Check to include this hit in error tolerant search or archive report

| Query                                                    | Observed | Mr(expt)  | Mr(calc)  | ppm  | Miss | Score | Expect  | Rank | Peptide                                      |
|----------------------------------------------------------|----------|-----------|-----------|------|------|-------|---------|------|----------------------------------------------|
| <input checked="" type="checkbox"/> <a href="#">2981</a> | 557.2635 | 1668.7687 | 1668.7638 | 2.95 | 0    | (42)  | 0.0029  | 1    | R_QSVNHQMAQEDAQR.L + Dimethyl (N-term)       |
| <input checked="" type="checkbox"/> <a href="#">2985</a> | 558.6052 | 1672.7937 | 1672.7889 | 2.88 | 0    | 51    | 0.00057 | 1    | R_QSVNHQMAQEDAQR.L + Dimethyl:2H(4) (N-term) |

Proteins matching the same set of peptides:

[IPI00461322](#) Mass: 44896 Score: 71 Queries matched: 2

Tax\_Id=10090 Gene\_Symbol=Anxa7 Adult male medulla oblongata cDNA, RIKEN full-length enriched library, clone:6330545A10 product:annexin A7, full insert sequence

[IPI00653636](#) Mass: 52503 Score: 71 Queries matched: 2

Tax\_Id=10090 Gene\_Symbol=Anxa7 Adult male medulla oblongata cDNA, RIKEN full-length enriched library, clone:6330438J06 product:annexin A7, full insert sequence

---

104. [IPI00125143](#) Mass: 42270 Score: 70 Queries matched: 1 emPAI: 0.06  
Tax\_Id=10090 Gene\_Symbol=Arpc1b Arpc1b protein

Check to include this hit in error tolerant search or archive report

| Query                                                    | Observed | Mr(expt)  | Mr(calc)  | ppm  | Miss | Score | Expect | Rank | Peptide                                                               |
|----------------------------------------------------------|----------|-----------|-----------|------|------|-------|--------|------|-----------------------------------------------------------------------|
| <input checked="" type="checkbox"/> <a href="#">3040</a> | 564.9735 | 1691.8987 | 1691.8930 | 3.38 | 0    | 70    | 2e-005 | 1    | K_ASSEGGAAATGAGLDSLHK.N + Dimethyl:2H(4) (K); Dimethyl:2H(4) (N-term) |

Proteins matching the same set of peptides:

[IPI00462975](#) Mass: 41757 Score: 70 Queries matched: 1

Tax\_Id=10090 Gene\_Symbol=EG434782 hypothetical protein

[IPI00857408](#) Mass: 11306 Score: 70 Queries matched: 1

Tax\_Id=10090 Gene\_Symbol=Arpc1b Protein

[IPI00874737](#) Mass: 41921 Score: 70 Queries matched: 1

Tax\_Id=10090 Gene\_Symbol=Arpc1b Actin-related protein 2/3 complex subunit 1B

---

105. [IPI00133903](#) Mass: 73768 Score: 70 Queries matched: 2 emPAI: 0.07  
Tax\_Id=10090 Gene\_Symbol=Hspa9 Stress-70 protein, mitochondrial precursor

Check to include this hit in error tolerant search or archive report

| Query                                                    | Observed | Mr(expt)  | Mr(calc)  | ppm  | Miss | Score | Expect | Rank | Peptide                                                           |
|----------------------------------------------------------|----------|-----------|-----------|------|------|-------|--------|------|-------------------------------------------------------------------|
| <input checked="" type="checkbox"/> <a href="#">3225</a> | 594.3187 | 1779.9342 | 1779.9268 | 4.16 | 1    | (48)  | 0.0041 | 1    | R_QAVTNPNNTFYATKR.L + Dimethyl (K); Dimethyl (N-term)             |
| <input checked="" type="checkbox"/> <a href="#">3231</a> | 597.0021 | 1787.9846 | 1787.9770 | 4.25 | 1    | 53    | 0.0013 | 1    | R_QAVTNPNNTFYATKR.L + Dimethyl:2H(4) (K); Dimethyl:2H(4) (N-term) |

---

106. [IPI00230682](#) Mass: 28183 Score: 68 Queries matched: 3 emPAI: 0.30  
Tax\_Id=10090 Gene\_Symbol=Ywhab Isoform Long of 14-3-3 protein beta/alpha

Check to include this hit in error tolerant search or archive report

| Query                                                    | Observed | Mr(expt)  | Mr(calc)  | ppm  | Miss | Score | Expect  | Rank | Peptide                                                    |
|----------------------------------------------------------|----------|-----------|-----------|------|------|-------|---------|------|------------------------------------------------------------|
| <input checked="" type="checkbox"/> <a href="#">910</a>  | 486.3246 | 970.6347  | 970.6303  | 4.62 | 0    | 32    | 0.063   | 1    | R_NLLSVAYK.N + Dimethyl:2H(4) (K); Dimethyl:2H(4) (N-term) |
| <input checked="" type="checkbox"/> <a href="#">2853</a> | 542.9305 | 1625.7697 | 1625.7645 | 3.22 | 0    | (47)  | 0.0016  | 1    | K_AVTEQGHELSNEER.N + Dimethyl (N-term)                     |
| <input checked="" type="checkbox"/> <a href="#">2862</a> | 544.2721 | 1629.7945 | 1629.7896 | 2.97 | 0    | 53    | 0.00056 | 1    | K_AVTEQGHELSNEER.N + Dimethyl:2H(4) (N-term)               |

Proteins matching the same set of peptides:

[IPI00750790](#) Mass: 18394 Score: 68 Queries matched: 3  
Tax\_Id=10090 Gene\_Symbol=Ywhab Tyrosine 3-monooxygenase/tryptophan 5-monooxygenase activation protein, beta  
[IPI00760000](#) Mass: 27951 Score: 68 Queries matched: 3  
Tax\_Id=10090 Gene\_Symbol=Ywhab Isoform Short of 14-3-3 protein beta/alpha

---

107. [IPI00115528](#) Mass: 71210 Score: 68 Queries matched: 2 emPAI: 0.07  
Tax\_Id=10090 Gene\_Symbol=Pls3 Plastin 3

Check to include this hit in error tolerant search or archive report

| Query                                                    | Observed | Mr(expt)  | Mr(calc)  | ppm  | Miss | Score | Expect | Rank | Peptide                                                    |
|----------------------------------------------------------|----------|-----------|-----------|------|------|-------|--------|------|------------------------------------------------------------|
| <input checked="" type="checkbox"/> <a href="#">2659</a> | 765.9017 | 1529.7889 | 1529.7759 | 8.49 | 0    | (42)  | 0.01   | 1    | <a href="#">K_MINLSVPTIDER.A + Dimethyl (N-term)</a>       |
| <input checked="" type="checkbox"/> <a href="#">2676</a> | 767.9132 | 1533.8119 | 1533.8010 | 7.06 | 0    | 52    | 0.0013 | 1    | <a href="#">K_MINLSVPTIDER.A + Dimethyl:2H(4) (N-term)</a> |

Proteins matching the same set of peptides:

[IPI00118892](#) Mass: 70732 Score: 68 Queries matched: 2  
Tax\_Id=10090 Gene\_Symbol=Lcp1 Plastin-2  
[IPI00776023](#) Mass: 72214 Score: 68 Queries matched: 2  
Tax\_Id=10090 Gene\_Symbol=Pls3 Plastin 3  
[IPI00874762](#) Mass: 71732 Score: 68 Queries matched: 2  
Tax\_Id=10090 Gene\_Symbol=Pls3 13 days embryo liver cDNA, RIKEN full-length enriched library, clone:I920006B08 product:plastin 3 (T-isoform), full insert sequence

---

108. [IPI00124264](#) Score: 66 Queries matched: 1  
Tax\_Id=10090 Gene\_Symbol=Anxall Annexin All

Check to include this hit in error tolerant search or archive report

| Query                                         | Observed | Mr(expt)  | Mr(calc)  | ppm  | Miss | Score | Expect   | Rank | Peptide                                                |
|-----------------------------------------------|----------|-----------|-----------|------|------|-------|----------|------|--------------------------------------------------------|
| <input type="checkbox"/> <a href="#">1299</a> | 553.3267 | 1104.6388 | 1104.6328 | 5.37 | 0    | 66    | 5.7e-005 | 1    | <a href="#">R_SELDLDIR.A + Dimethyl:2H(4) (N-term)</a> |

Proteins matching the same set of peptides:

[IPI00848382](#) Score: 66 Queries matched: 1  
[IPI00849293](#) Score: 66 Queries matched: 1

---

109. [IPI00226430](#) Mass: 42288 Score: 64 Queries matched: 4 emPAI: 0.19  
Tax\_Id=10090 Gene\_Symbol=Acaa2 3-ketoacyl-CoA thiolase, mitochondrial

Check to include this hit in error tolerant search or archive report

| Query                                                    | Observed | Mr(expt)  | Mr(calc)  | ppm  | Miss | Score | Expect | Rank | Peptide                                                                           |
|----------------------------------------------------------|----------|-----------|-----------|------|------|-------|--------|------|-----------------------------------------------------------------------------------|
| <input checked="" type="checkbox"/> <a href="#">739</a>  | 434.8108 | 867.6070  | 867.6033  | 4.17 | 0    | 43    | 0.0026 | 1    | <a href="#">R_GVFIVAAR.R + Dimethyl:2H(4) (K); Dimethyl:2H(4) (N-term)</a>        |
| <input checked="" type="checkbox"/> <a href="#">4278</a> | 610.0705 | 2436.2527 | 2436.2431 | 3.95 | 0    | (30)  | 0.23   | 1    | <a href="#">K_QTMQVDEHARPQTTLQQLQK.L + Dimethyl (K); Dimethyl (N-term)</a>        |
| <input checked="" type="checkbox"/> <a href="#">4279</a> | 610.0709 | 2436.2546 | 2436.2431 | 4.72 | 0    | 38    | 0.038  | 1    | <a href="#">K_QTMQVDEHARPQTTLQQLQK.L + Dimethyl (K); Dimethyl (N-term)</a>        |
| <input checked="" type="checkbox"/> <a href="#">4499</a> | 676.6194 | 2702.4484 | 2702.4351 | 4.92 | 1    | 28    | 0.36   | 1    | <a href="#">K_ALDLDPSTNVSQGAIALGHPLGGSGSR.I + Dimethyl (K); Dimethyl (N-term)</a> |

Proteins matching the same set of peptides:

[IPI00653158](#) Mass: 42260 Score: 64 Queries matched: 4

110. [IPI00313222](#) Mass: 33546 Score: 64 Queries matched: 2 emPAI: 0.16

Tax\_Id=10090 Gene\_Symbol=Rpl6 60S ribosomal protein L6

Check to include this hit in error tolerant search or archive report

| Query                                                    | Observed | Mr(expt)  | Mr(calc)  | ppm  | Miss | Score | Expect | Rank | Peptide                                               |
|----------------------------------------------------------|----------|-----------|-----------|------|------|-------|--------|------|-------------------------------------------------------|
| <input checked="" type="checkbox"/> <a href="#">1475</a> | 586.8456 | 1171.6767 | 1171.6713 | 4.62 | 0    | (39)  | 0.023  | 1    | K <sub>2</sub> AVPQLQGYLR.S + Dimethyl (N-term)       |
| <input checked="" type="checkbox"/> <a href="#">1499</a> | 588.8591 | 1175.7036 | 1175.6964 | 6.07 | 0    | 50    | 0.0019 | 1    | K <sub>2</sub> AVPQLQGYLR.S + Dimethyl:2H(4) (N-term) |

Proteins matching the same set of peptides:

- [IPI00378933](#) Mass: 13643 Score: 64 Queries matched: 2  
Tax\_Id=10090 Gene\_Symbol=EG383462 similar to ribosomal protein L6
- [IPI00457852](#) Mass: 34930 Score: 64 Queries matched: 2  
Tax\_Id=10090 Gene\_Symbol=EG432502 similar to ribosomal protein L6
- [IPI00626312](#) Mass: 33518 Score: 64 Queries matched: 2  
Tax\_Id=10090 Gene\_Symbol=EG620213 similar to ribosomal protein L6
- [IPI00750333](#) Mass: 33429 Score: 64 Queries matched: 2  
Tax\_Id=10090 Gene\_Symbol=EG627889 similar to ribosomal protein L6 isoform 1
- [IPI00848644](#) Mass: 32313 Score: 64 Queries matched: 2  
Tax\_Id=10090 Gene\_Symbol=EG627889 similar to ribosomal protein L6 isoform 2

111. [IPI00228253](#) Mass: 41727 Score: 64 Queries matched: 2 emPAI: 0.06

Tax\_Id=10090 Gene\_Symbol=Acat2 Acetyl-CoA acetyltransferase, cytosolic

Check to include this hit in error tolerant search or archive report

| Query                                                    | Observed | Mr(expt)  | Mr(calc)  | ppm  | Miss | Score | Expect   | Rank | Peptide                                                                               |
|----------------------------------------------------------|----------|-----------|-----------|------|------|-------|----------|------|---------------------------------------------------------------------------------------|
| <input checked="" type="checkbox"/> <a href="#">2644</a> | 507.9676 | 1520.8811 | 1520.8762 | 3.23 | 1    | 64    | 8.1e-005 | 1    | R <sub>2</sub> EAQDKVAVLSQNR.A + Dimethyl:2H(4) (K); Dimethyl:2H(4) (N-term)          |
| <input checked="" type="checkbox"/> <a href="#">4060</a> | 444.4610 | 2217.2686 | 2217.2619 | 3.04 | 2    | 32    | 0.094    | 1    | R <sub>2</sub> EAQDKVAVLSQNR.AEHAQK.A + 2 Dimethyl:2H(4) (K); Dimethyl:2H(4) (N-term) |

Proteins matching the same set of peptides:

- [IPI00330685](#) Mass: 41895 Score: 64 Queries matched: 2  
Tax\_Id=10090 Gene\_Symbol=Acat3 Acetyl CoA transferase-like protein
- [IPI00776358](#) Mass: 41900 Score: 64 Queries matched: 2  
Tax\_Id=10090 Gene\_Symbol=Acat3 acetyl-Coenzyme A acetyltransferase 3

112. [IPI00283862](#) Mass: 29813 Score: 63 Queries matched: 2 emPAI: 0.18

Tax\_Id=10090 Gene\_Symbol=Psmal Proteasome subunit alpha type-1

Check to include this hit in error tolerant search or archive report

| Query                                                    | Observed | Mr(expt)  | Mr(calc)  | ppm  | Miss | Score | Expect  | Rank | Peptide                                                                                               |
|----------------------------------------------------------|----------|-----------|-----------|------|------|-------|---------|------|-------------------------------------------------------------------------------------------------------|
| <input checked="" type="checkbox"/> <a href="#">4232</a> | 599.0397 | 2392.1296 | 2392.1216 | 3.34 | 2    | (42)  | 0.0061  | 1    | R <sub>2</sub> KAQPSQAAEPEAEKADPEMEH.- + 2 Dimethyl (K); Dimethyl (N-term); Oxidation (M)             |
| <input checked="" type="checkbox"/> <a href="#">4242</a> | 602.0583 | 2404.2040 | 2404.1969 | 2.96 | 2    | 54    | 0.00071 | 1    | R <sub>2</sub> KAQPSQAAEPEAEKADPEMEH.- + 2 Dimethyl:2H(4) (K); Dimethyl:2H(4) (N-term); Oxidation (M) |

113. [IPI00310240](#) Mass: 75697 Score: 63 Queries matched: 1 emPAI: 0.03

Tax\_Id=10090 Gene\_Symbol=Anxa6 13 days embryo forelimb cDNA, RIKEN full-length enriched library, clone:5930413M14 product:annexin A6, full insert sequence

Check to include this hit in error tolerant search or archive report

| Query                                                    | Observed | Mr(expt)  | Mr(calc)  | ppm  | Miss | Score | Expect  | Rank | Peptide                                                      |
|----------------------------------------------------------|----------|-----------|-----------|------|------|-------|---------|------|--------------------------------------------------------------|
| <input checked="" type="checkbox"/> <a href="#">3149</a> | 581.6619 | 1741.9638 | 1741.9512 | 7.19 | 0    | 63    | 0.00012 | 1    | <a href="#">K_GIGTDEATIIVTHR.S</a> + Dimethyl:2H(4) (N-term) |

Proteins matching the same set of peptides:

[IPI00554894](#) Mass: 76295 Score: 63 Queries matched: 1  
Tax\_Id=10090 Gene\_Symbol=Anxa6 Annexin A6  
[IPI00649152](#) Mass: 76294 Score: 63 Queries matched: 1  
Tax\_Id=10090 Gene\_Symbol=Anxa6 Bone marrow macrophage cDNA, RIKEN full-length enriched library, clone:G530123A09 product:annexin A6, full insert sequence  
[IPI00875218](#) Mass: 76208 Score: 63 Queries matched: 1  
Tax\_Id=10090 Gene\_Symbol=Anxa6 76 kDa protein

---

114. [IPI00116645](#) Mass: 33506 Score: 62 Queries matched: 2 emPAI: 0.16  
Tax\_Id=10090 Gene\_Symbol=Cnn1 Isoform Alpha of Calponin-1

Check to include this hit in error tolerant search or archive report

| Query                                                    | Observed | Mr(expt)  | Mr(calc)  | ppm  | Miss | Score | Expect | Rank | Peptide                                                                      |
|----------------------------------------------------------|----------|-----------|-----------|------|------|-------|--------|------|------------------------------------------------------------------------------|
| <input checked="" type="checkbox"/> <a href="#">1826</a> | 622.8587 | 1243.7029 | 1243.6958 | 5.66 | 0    | (42)  | 0.013  | 1    | <a href="#">R_NIIGLQMGTK.F</a> + Dimethyl (K); Dimethyl (N-term)             |
| <input checked="" type="checkbox"/> <a href="#">1848</a> | 626.8844 | 1251.7542 | 1251.7460 | 6.55 | 0    | 44    | 0.0072 | 1    | <a href="#">R_NIIGLQMGTK.F</a> + Dimethyl:2H(4) (K); Dimethyl:2H(4) (N-term) |

Proteins matching the same set of peptides:

[IPI00228258](#) Mass: 29250 Score: 62 Queries matched: 2  
Tax\_Id=10090 Gene\_Symbol=Cnn1 Isoform Beta of Calponin-1

---

115. [IPI00221817](#) Mass: 87829 Score: 62 Queries matched: 2 emPAI: 0.06  
Tax\_Id=10090 Gene\_Symbol=Loh11cr2a Loss of heterozygosity 11 chromosomal region 2 gene A protein homolog

Check to include this hit in error tolerant search or archive report

| Query                                                    | Observed | Mr(expt)  | Mr(calc)  | ppm  | Miss | Score | Expect  | Rank | Peptide                                                  |
|----------------------------------------------------------|----------|-----------|-----------|------|------|-------|---------|------|----------------------------------------------------------|
| <input checked="" type="checkbox"/> <a href="#">1572</a> | 599.3749 | 1196.7353 | 1196.7281 | 6.04 | 0    | 54    | 0.00058 | 1    | <a href="#">R_YLLPAILNPR.Y</a> + Dimethyl (N-term)       |
| <input checked="" type="checkbox"/> <a href="#">1586</a> | 601.3872 | 1200.7599 | 1200.7532 | 5.55 | 0    | (32)  | 0.062   | 1    | <a href="#">R_YLLPAILNPR.Y</a> + Dimethyl:2H(4) (N-term) |

---

116. [IPI00312058](#) Mass: 60013 Score: 61 Queries matched: 3 emPAI: 0.13  
Tax\_Id=10090 Gene\_Symbol=Cat Catalase

Check to include this hit in error tolerant search or archive report

| Query                                                    | Observed | Mr(expt)  | Mr(calc)  | ppm  | Miss | Score | Expect | Rank | Peptide                                                                                       |
|----------------------------------------------------------|----------|-----------|-----------|------|------|-------|--------|------|-----------------------------------------------------------------------------------------------|
| <input checked="" type="checkbox"/> <a href="#">3015</a> | 561.2923 | 1680.8551 | 1680.8481 | 4.12 | 1    | 42    | 0.011  | 1    | <a href="#">K_RFNSANEDNVTQVR.T</a> + Dimethyl:2H(4) (N-term)                                  |
| <input checked="" type="checkbox"/> <a href="#">4548</a> | 721.3897 | 2881.5297 | 2881.5080 | 7.55 | 1    | 47    | 0.0039 | 1    | <a href="#">R_ASQRPDVLTGGGNPIGDKLNIMTAGSR.G</a> + Dimethyl (K); Dimethyl (N-term)             |
| <input checked="" type="checkbox"/> <a href="#">4550</a> | 723.4017 | 2889.5778 | 2889.5582 | 6.79 | 1    | (26)  | 0.37   | 1    | <a href="#">R_ASQRPDVLTGGGNPIGDKLNIMTAGSR.G</a> + Dimethyl:2H(4) (K); Dimethyl:2H(4) (N-term) |

Proteins matching the same set of peptides:

[IPI00869393](#) Mass: 60043 Score: 61 Queries matched: 3  
Tax\_Id=10090 Gene\_Symbol=Cat catalase

117. [IPI00114894](#) Mass: 227743 Score: 60 Queries matched: 2 emPAI: 0.02

Tax\_Id=10090 Gene\_Symbol=Myh11 Isoform 1 of Myosin-11

Check to include this hit in error tolerant search or archive report

| Query                                                    | Observed | Mr(expt)  | Mr(calc)  | ppm  | Miss | Score | Expect  | Rank | Peptide                                                            |
|----------------------------------------------------------|----------|-----------|-----------|------|------|-------|---------|------|--------------------------------------------------------------------|
| <input checked="" type="checkbox"/> <a href="#">874</a>  | 477.3112 | 952.6078  | 952.6044  | 3.48 | 0    | 32    | 0.081   | 1    | K_STVAALEAK.I + Dimethyl:2H(4) (K); Dimethyl:2H(4) (N-term)        |
| <input checked="" type="checkbox"/> <a href="#">3233</a> | 597.6956 | 1790.0650 | 1790.0542 | 6.07 | 0    | 55    | 0.00039 | 1    | K_QLLQANPILEAFGNAK.T + Dimethyl:2H(4) (K); Dimethyl:2H(4) (N-term) |

Proteins matching the same set of peptides:

[IPI00227865](#) Mass: 223983 Score: 60 Queries matched: 2

Tax\_Id=10090 Gene\_Symbol=Myh11 Isoform 2 of Myosin-11

[IPI00876408](#) Mass: 227864 Score: 60 Queries matched: 2

Tax\_Id=10090 Gene\_Symbol=Myh11 Myh11 protein

118. [IPI00124287](#) Mass: 70826 Score: 59 Queries matched: 1 emPAI: 0.04

Tax\_Id=10090 Gene\_Symbol=Pabpc1 Polyadenylate-binding protein 1

Check to include this hit in error tolerant search or archive report

| Query                                                    | Observed | Mr(expt)  | Mr(calc)  | ppm  | Miss | Score | Expect  | Rank | Peptide                                   |
|----------------------------------------------------------|----------|-----------|-----------|------|------|-------|---------|------|-------------------------------------------|
| <input checked="" type="checkbox"/> <a href="#">2314</a> | 474.5816 | 1420.7230 | 1420.7183 | 3.29 | 0    | 59    | 0.00021 | 1    | R_QAHLTNQYMQR.M + Dimethyl:2H(4) (N-term) |

Proteins matching the same set of peptides:

[IPI00331552](#) Mass: 70854 Score: 59 Queries matched: 1

Tax\_Id=10090 Gene\_Symbol=Pabpc1 Bone marrow macrophage cDNA, RIKEN full-length enriched library, clone:I830046M23 product:poly A binding protein, cytoplasmic 1, fu

119. [IPI00119667](#) Mass: 50764 Score: 58 Queries matched: 7 emPAI: 0.16

Tax\_Id=10090 Gene\_Symbol=Eef1a2 Elongation factor 1-alpha 2

Check to include this hit in error tolerant search or archive report

| Query                                                    | Observed | Mr(expt)  | Mr(calc)  | ppm  | Miss | Score | Expect | Rank | Peptide                                                     |
|----------------------------------------------------------|----------|-----------|-----------|------|------|-------|--------|------|-------------------------------------------------------------|
| <input checked="" type="checkbox"/> <a href="#">906</a>  | 485.8203 | 969.6261  | 969.6223  | 3.92 | 0    | (31)  | 0.091  | 1    | R_QTVAVGVIK.N + Dimethyl (K); Dimethyl (N-term)             |
| <input checked="" type="checkbox"/> <a href="#">907</a>  | 485.8205 | 969.6265  | 969.6223  | 4.37 | 0    | (27)  | 0.25   | 1    | R_QTVAVGVIK.N + Dimethyl (K); Dimethyl (N-term)             |
| <input checked="" type="checkbox"/> <a href="#">930</a>  | 489.8456 | 977.6766  | 977.6725  | 4.20 | 0    | 35    | 0.025  | 1    | R_QTVAVGVIK.N + Dimethyl:2H(4) (K); Dimethyl:2H(4) (N-term) |
| <input checked="" type="checkbox"/> <a href="#">931</a>  | 489.8456 | 977.6766  | 977.6725  | 4.20 | 0    | (28)  | 0.13   | 1    | R_QTVAVGVIK.N + Dimethyl:2H(4) (K); Dimethyl:2H(4) (N-term) |
| <input checked="" type="checkbox"/> <a href="#">1183</a> | 527.3262 | 1052.6379 | 1052.6342 | 3.48 | 0    | (32)  | 0.1    | 1    | K_IGGIGTVPVGR.V + Dimethyl (N-term)                         |
| <input checked="" type="checkbox"/> <a href="#">1184</a> | 527.3266 | 1052.6387 | 1052.6342 | 4.25 | 0    | 38    | 0.02   | 1    | K_IGGIGTVPVGR.V + Dimethyl (N-term)                         |
| <input checked="" type="checkbox"/> <a href="#">1206</a> | 529.3393 | 1056.6640 | 1056.6594 | 4.42 | 0    | (33)  | 0.083  | 1    | K_IGGIGTVPVGR.V + Dimethyl:2H(4) (N-term)                   |

Proteins matching the same set of peptides:

[IPI00307837](#) Mass: 50424 Score: 58 Queries matched: 7

Tax\_Id=10090 Gene\_Symbol=Eef1a1 Elongation factor 1-alpha 1

120. [IPI00420882](#) Mass: 118937 Score: 57 Queries matched: 3 emPAI: 0.07

Tax\_Id=10090 Gene\_Symbol=Ogdh Isoform 4 of 2-oxoglutarate dehydrogenase E1 component, mitochondrial precursor

Check to include this hit in error tolerant search or archive report

| Query                                                    | Observed | Mr(expt)  | Mr(calc)  | ppm  | Miss | Score | Expect | Rank | Peptide                                                                  |
|----------------------------------------------------------|----------|-----------|-----------|------|------|-------|--------|------|--------------------------------------------------------------------------|
| <input checked="" type="checkbox"/> <a href="#">1342</a> | 560.7875 | 1119.5605 | 1119.5560 | 4.01 | 0    | 39    | 0.012  | 1    | R <sub>2</sub> SSPYPTDVAR.V + Dimethyl (N-term)                          |
| <input checked="" type="checkbox"/> <a href="#">1353</a> | 562.8001 | 1123.5857 | 1123.5811 | 4.07 | 0    | (38)  | 0.017  | 1    | R <sub>2</sub> SSPYPTDVAR.V + Dimethyl:2H(4) (N-term)                    |
| <input checked="" type="checkbox"/> <a href="#">3087</a> | 571.9473 | 1712.8202 | 1712.8130 | 4.16 | 0    | 29    | 0.11   | 1    | R <sub>2</sub> TSFDEMLPGTHFQR.V + Dimethyl:2H(4) (N-term); Oxidation (M) |

Proteins matching the same set of peptides:

[IPI00626237](#) Mass: 117572 Score: 57 Queries matched: 3  
Tax\_Id=10090 Gene\_Symbol=Ogdh Isoform 1 of 2-oxoglutarate dehydrogenase E1 component, mitochondrial precursor  
[IPI00719841](#) Mass: 117208 Score: 57 Queries matched: 3  
Tax\_Id=10090 Gene\_Symbol=Ogdh Isoform 2 of 2-oxoglutarate dehydrogenase E1 component, mitochondrial precursor  
[IPI00845652](#) Mass: 119301 Score: 57 Queries matched: 3  
Tax\_Id=10090 Gene\_Symbol=Ogdh Isoform 3 of 2-oxoglutarate dehydrogenase E1 component, mitochondrial precursor

121. [IPI00129225](#) Mass: 48951 Score: 57 Queries matched: 3 emPAI: 0.11  
Tax\_Id=10090 Gene\_Symbol=Kng1 Isoform LMW of Kininogen-1 precursor

Check to include this hit in error tolerant search or archive report

| Query                                                    | Observed | Mr(expt)  | Mr(calc)  | ppm  | Miss | Score | Expect | Rank | Peptide                                                                           |
|----------------------------------------------------------|----------|-----------|-----------|------|------|-------|--------|------|-----------------------------------------------------------------------------------|
| <input checked="" type="checkbox"/> <a href="#">3589</a> | 647.0034 | 1937.9882 | 1937.9806 | 3.93 | 2    | 47    | 0.004  | 1    | K <sub>2</sub> AGAEPAPERQAESSQVKQ.- + Dimethyl (K); Dimethyl (N-term)             |
| <input checked="" type="checkbox"/> <a href="#">3604</a> | 649.6862 | 1946.0367 | 1946.0309 | 3.02 | 2    | (32)  | 0.13   | 1    | K <sub>2</sub> AGAEPAPERQAESSQVKQ.- + Dimethyl:2H(4) (K); Dimethyl:2H(4) (N-term) |
| <input checked="" type="checkbox"/> <a href="#">3605</a> | 649.6863 | 1946.0372 | 1946.0309 | 3.26 | 2    | (35)  | 0.073  | 1    | K <sub>2</sub> AGAEPAPERQAESSQVKQ.- + Dimethyl:2H(4) (K); Dimethyl:2H(4) (N-term) |

Proteins matching the same set of peptides:

[IPI00857103](#) Mass: 48940 Score: 57 Queries matched: 3  
Tax\_Id=10090 Gene\_Symbol=Kng2 kininogen 2 isoform 2

122. [IPI00119114](#) Mass: 48277 Score: 57 Queries matched: 2 emPAI: 0.11  
Tax\_Id=10090 Gene\_Symbol=Acadl Long-chain specific acyl-CoA dehydrogenase, mitochondrial precursor

Check to include this hit in error tolerant search or archive report

| Query                                                    | Observed | Mr(expt)  | Mr(calc)  | ppm  | Miss | Score | Expect | Rank | Peptide                                                                    |
|----------------------------------------------------------|----------|-----------|-----------|------|------|-------|--------|------|----------------------------------------------------------------------------|
| <input checked="" type="checkbox"/> <a href="#">1635</a> | 606.3754 | 1210.7363 | 1210.7285 | 6.46 | 0    | (36)  | 0.044  | 1    | K <sub>2</sub> QGLLGINIAEK.H + Dimethyl (K); Dimethyl (N-term)             |
| <input checked="" type="checkbox"/> <a href="#">1672</a> | 610.4009 | 1218.7872 | 1218.7787 | 6.96 | 0    | 47    | 0.0015 | 1    | K <sub>2</sub> QGLLGINIAEK.H + Dimethyl:2H(4) (K); Dimethyl:2H(4) (N-term) |

123. [IPI00115833](#) Mass: 96676 Score: 57 Queries matched: 2 emPAI: 0.03  
Tax\_Id=10090 Gene\_Symbol=Mtap6 microtubule-associated protein 6 isoform 1

Check to include this hit in error tolerant search or archive report

| Query                                                    | Observed | Mr(expt)  | Mr(calc)  | ppm  | Miss | Score | Expect  | Rank | Peptide                                                                     |
|----------------------------------------------------------|----------|-----------|-----------|------|------|-------|---------|------|-----------------------------------------------------------------------------|
| <input checked="" type="checkbox"/> <a href="#">3980</a> | 543.0380 | 2168.1227 | 2168.1073 | 7.10 | 1    | 27    | 0.42    | 1    | K.NQGLAGPELVKDTGTDTTAPR.Y + Dimethyl (K)                                    |
| <input checked="" type="checkbox"/> <a href="#">4330</a> | 495.0500 | 2470.2135 | 2470.2061 | 3.00 | 2    | 57    | 0.00032 | 1    | R <sub>2</sub> RSEGHEQTPAAHAQGTGPEGGKGR.A + Dimethyl (K); Dimethyl (N-term) |

124. [IPI00622946](#) Mass: 109360 Score: 57 Queries matched: 3 emPAI: 0.02  
Tax\_Id=10090 Gene\_Symbol=Palld Isoform 4 of Palladin



Check to include this hit in error tolerant search or archive report

| Query                                                    | Observed | Mr(expt)  | Mr(calc)  | ppm  | Miss | Score | Expect | Rank | Peptide                                                                |
|----------------------------------------------------------|----------|-----------|-----------|------|------|-------|--------|------|------------------------------------------------------------------------|
| <input checked="" type="checkbox"/> <a href="#">2123</a> | 675.3737 | 1348.7328 | 1348.7238 | 6.65 | 0    | 26    | 0.44   | 1    | R_YAALSDQGLDIK.A + Dimethyl (K); Dimethyl (N-term)                     |
| <input checked="" type="checkbox"/> <a href="#">4147</a> | 765.4199 | 2293.2377 | 2293.2253 | 5.43 | 1    | (38)  | 0.034  | 1    | R_IASDEEIQGTKDAVIQDLER.K + Dimethyl:2H(4) (K); Dimethyl:2H(4) (N-term) |
| <input checked="" type="checkbox"/> <a href="#">4148</a> | 765.4199 | 2293.2379 | 2293.2253 | 5.52 | 1    | 50    | 0.0025 | 1    | R_IASDEEIQGTKDAVIQDLER.K + Dimethyl:2H(4) (K); Dimethyl:2H(4) (N-term) |

Proteins matching the same set of peptides:

|                                                      |              |           |                    |
|------------------------------------------------------|--------------|-----------|--------------------|
| <a href="#">IPI00756702</a>                          | Mass: 73567  | Score: 57 | Queries matched: 3 |
| Tax_Id=10090 Gene_Symbol=Palld Isoform 5 of Palladin |              |           |                    |
| <a href="#">IPI00856302</a>                          | Mass: 151999 | Score: 57 | Queries matched: 3 |
| Tax_Id=10090 Gene_Symbol=Palld Isoform 6 of Palladin |              |           |                    |
| <a href="#">IPI00856926</a>                          | Mass: 72950  | Score: 57 | Queries matched: 3 |
| Tax_Id=10090 Gene_Symbol=Palld Isoform 3 of Palladin |              |           |                    |
| <a href="#">IPI00858000</a>                          | Mass: 153576 | Score: 57 | Queries matched: 3 |
| Tax_Id=10090 Gene_Symbol=Palld Isoform 1 of Palladin |              |           |                    |

---

125. [IPI00271262](#) Mass: 163691 Score: 55 Queries matched: 2 emPAI: 0.03  
Tax\_Id=10090 Gene\_Symbol=Mug2 Murinoglobulin-2 precursor

Check to include this hit in error tolerant search or archive report

| Query                | Observed | Mr(expt)  | Mr(calc)  | ppm   | Miss | Score | Expect | Rank | Peptide                                               |
|----------------------|----------|-----------|-----------|-------|------|-------|--------|------|-------------------------------------------------------|
| <a href="#">438</a>  | 352.7277 | 703.4408  | 703.4381  | 3.91  | 0    | 38    | 0.017  | 1    | K_ALGFRLR.A + Dimethyl (N-term)                       |
| <a href="#">2868</a> | 544.6272 | 1630.8597 | 1630.8752 | -9.52 | 0    | 51    | 0.0015 | 1    | R_AHFSVMGDILSSAIK.N + Dimethyl (K); Dimethyl (N-term) |

Proteins matching the same set of peptides:

|                                                          |              |           |                    |
|----------------------------------------------------------|--------------|-----------|--------------------|
| <a href="#">IPI00420891</a>                              | Mass: 163807 | Score: 55 | Queries matched: 2 |
| Tax_Id=10090 Gene_Symbol=Mug4 Murinoglobulin-4 precursor |              |           |                    |

---

126. [IPI00124692](#) Mass: 37534 Score: 54 Queries matched: 5 emPAI: 0.39  
Tax\_Id=10090 Gene\_Symbol=Taldol1 Transaldolase

Check to include this hit in error tolerant search or archive report

| Query                                                    | Observed | Mr(expt)  | Mr(calc)  | ppm  | Miss | Score | Expect | Rank | Peptide                                                         |
|----------------------------------------------------------|----------|-----------|-----------|------|------|-------|--------|------|-----------------------------------------------------------------|
| <input checked="" type="checkbox"/> <a href="#">704</a>  | 427.7906 | 853.5666  | 853.5637  | 3.47 | 0    | 34    | 0.038  | 1    | K_LAPALSVK.A + Dimethyl (K); Dimethyl (N-term)                  |
| <input checked="" type="checkbox"/> <a href="#">731</a>  | 431.8156 | 861.6166  | 861.6139  | 3.09 | 0    | (32)  | 0.023  | 1    | K_LAPALSVK.A + Dimethyl:2H(4) (K); Dimethyl:2H(4) (N-term)      |
| <input checked="" type="checkbox"/> <a href="#">2011</a> | 656.8497 | 1311.6849 | 1311.6798 | 3.89 | 0    | 27    | 0.27   | 1    | K_SYEPQEDPGVK.S + Dimethyl:2H(4) (K); Dimethyl:2H(4) (N-term)   |
| <input checked="" type="checkbox"/> <a href="#">2113</a> | 449.2796 | 1344.8170 | 1344.8129 | 3.05 | 2    | 40    | 0.016  | 1    | R_KFAADAIKLER.M + 2 Dimethyl (K); Dimethyl (N-term)             |
| <input checked="" type="checkbox"/> <a href="#">2136</a> | 453.3047 | 1356.8923 | 1356.8882 | 3.03 | 2    | (29)  | 0.064  | 1    | R_KFAADAIKLER.M + 2 Dimethyl:2H(4) (K); Dimethyl:2H(4) (N-term) |

---

127. [IPI00117730](#) Mass: 71270 Score: 54 Queries matched: 1 emPAI: 0.04  
Tax\_Id=10090 Gene\_Symbol=Gbp3 Guanylate-binding protein 4

Check to include this hit in error tolerant search or archive report

| Query                                                    | Observed | Mr(expt)  | Mr(calc)  | ppm  | Miss | Score | Expect  | Rank | Peptide                                    |
|----------------------------------------------------------|----------|-----------|-----------|------|------|-------|---------|------|--------------------------------------------|
| <input checked="" type="checkbox"/> <a href="#">2382</a> | 480.2291 | 1437.6655 | 1437.6608 | 3.27 | 0    | 54    | 0.00019 | 1    | K_AADHYSEQMAQR.M + Dimethyl:2H(4) (N-term) |

Proteins matching the same set of peptides:

[IPI00225190](#) Mass: 72046 Score: 54 Queries matched: 1  
Tax\_Id=10090 Gene\_Symbol=BC057170 CDNA sequence BC057170  
[IPI00454028](#) Mass: 73188 Score: 54 Queries matched: 1  
Tax\_Id=10090 Gene\_Symbol=Gbp6 guanylate binding protein 7  
[IPI00660746](#) Mass: 70997 Score: 54 Queries matched: 1  
Tax\_Id=10090 Gene\_Symbol=EG634650 70 kDa protein  
[IPI00675360](#) Mass: 71694 Score: 54 Queries matched: 1  
Tax\_Id=10090 Gene\_Symbol=EG634650 Predicted  
[IPI00751212](#) Mass: 70977 Score: 54 Queries matched: 1  
Tax\_Id=10090 Gene\_Symbol=Mpa2l Mpa2l protein  
[IPI00853773](#) Mass: 70926 Score: 54 Queries matched: 1  
Tax\_Id=10090 Gene\_Symbol=EG634650 Guanylate-binding protein 10  
[IPI00875535](#) Mass: 71048 Score: 54 Queries matched: 1  
Tax\_Id=10090 Gene\_Symbol=Mpa2l 71 kDa protein

---

128. [IPI00230706](#) Mass: 28980 Score: 54 Queries matched: 2 emPAI: 0.19  
Tax\_Id=10090 Gene\_Symbol=Pgam2 Phosphoglycerate mutase 2

Check to include this hit in error tolerant search or archive report

| Query                                                    | Observed | Mr(expt)  | Mr(calc)  | ppm  | Miss | Score | Expect | Rank | Peptide                                   |
|----------------------------------------------------------|----------|-----------|-----------|------|------|-------|--------|------|-------------------------------------------|
| <input checked="" type="checkbox"/> <a href="#">1515</a> | 393.5729 | 1177.6967 | 1177.6931 | 3.06 | 0    | (44)  | 0.0082 | 1    | R_VLIAAHGNSLR.G + Dimethyl (N-term)       |
| <input checked="" type="checkbox"/> <a href="#">1529</a> | 394.9146 | 1181.7218 | 1181.7182 | 3.04 | 0    | 44    | 0.0062 | 1    | R_VLIAAHGNSLR.G + Dimethyl:2H(4) (N-term) |

Proteins matching the same set of peptides:

[IPI00457898](#) Mass: 28928 Score: 54 Queries matched: 2  
Tax\_Id=10090 Gene\_Symbol=Pgam1 Phosphoglycerate mutase 1

---

129. [IPI00127596](#) Mass: 43246 Score: 53 Queries matched: 4 emPAI: 0.19  
Tax\_Id=10090 Gene\_Symbol=Ckm Creatine kinase M-type

Check to include this hit in error tolerant search or archive report

| Query                                                    | Observed | Mr(expt)  | Mr(calc)  | ppm  | Miss | Score | Expect | Rank | Peptide                                                          |
|----------------------------------------------------------|----------|-----------|-----------|------|------|-------|--------|------|------------------------------------------------------------------|
| <input checked="" type="checkbox"/> <a href="#">847</a>  | 472.2775 | 942.5404  | 942.5370  | 3.64 | 0    | 39    | 0.025  | 1    | K_LMVEMEK.K + Dimethyl:2H(4) (K); Dimethyl:2H(4) (N-term)        |
| <input checked="" type="checkbox"/> <a href="#">1358</a> | 563.8547 | 1125.6948 | 1125.6885 | 5.57 | 0    | 30    | 0.18   | 1    | K_VLTPDLYNK.L + Dimethyl:2H(4) (K); Dimethyl:2H(4) (N-term)      |
| <input checked="" type="checkbox"/> <a href="#">3255</a> | 603.3235 | 1806.9486 | 1806.9403 | 4.61 | 0    | 40    | 0.026  | 1    | K_LNYPQEEYDLSK.H + 2 Dimethyl (K); Dimethyl (N-term)             |
| <input checked="" type="checkbox"/> <a href="#">3309</a> | 607.3486 | 1819.0241 | 1819.0157 | 4.63 | 0    | (28)  | 0.38   | 1    | K_LNYPQEEYDLSK.H + 2 Dimethyl:2H(4) (K); Dimethyl:2H(4) (N-term) |

---

130. [IPI00322312](#) Mass: 23450 Score: 53 Queries matched: 2 emPAI: 0.23  
Tax\_Id=10090 Gene\_Symbol=Arhgdia Rho GDP-dissociation inhibitor 1

Check to include this hit in error tolerant search or archive report

| Query                                                    | Observed | Mr(expt)  | Mr(calc)  | ppm  | Miss | Score | Expect | Rank | Peptide                                                           |
|----------------------------------------------------------|----------|-----------|-----------|------|------|-------|--------|------|-------------------------------------------------------------------|
| <input checked="" type="checkbox"/> <a href="#">3628</a> | 658.6758 | 1973.0057 | 1972.9953 | 5.28 | 1    | 44    | 0.0082 | 1    | K_SIQEIQLDKDDESLR.K + Dimethyl (K); Dimethyl (N-term)             |
| <input checked="" type="checkbox"/> <a href="#">3640</a> | 661.3589 | 1981.0550 | 1981.0455 | 4.80 | 1    | (34)  | 0.099  | 1    | K_SIQEIQLDKDDESLR.K + Dimethyl:2H(4) (K); Dimethyl:2H(4) (N-term) |

---

131. [IPI00353727](#) Mass: 36252 Score: 53 Queries matched: 2 emPAI: 0.15

Tax\_Id=10090 Gene\_Symbol=Anxa4 Annexin A4

Check to include this hit in error tolerant search or archive report

| Query                                                    | Observed | Mr(expt)  | Mr(calc)  | ppm  | Miss | Score | Expect  | Rank | Peptide                                    |
|----------------------------------------------------------|----------|-----------|-----------|------|------|-------|---------|------|--------------------------------------------|
| <input checked="" type="checkbox"/> <a href="#">2772</a> | 528.2760 | 1581.8062 | 1581.8012 | 3.17 | 1    | 53    | 0.00086 | 1    | R_RINQTYQQQYGR.S + Dimethyl (N-term)       |
| <input checked="" type="checkbox"/> <a href="#">2778</a> | 529.6175 | 1585.8307 | 1585.8263 | 2.80 | 1    | (31)  | 0.14    | 1    | R_RINQTYQQQYGR.S + Dimethyl:2H(4) (N-term) |

Proteins matching the same set of peptides:

[IPI00473555](#) Mass: 22028 Score: 53 Queries matched: 2

Tax\_Id=10090 Gene\_Symbol=Anxa4 Truncated annexin IV

[IPI00830586](#) Mass: 28755 Score: 53 Queries matched: 2

Tax\_Id=10090 Gene\_Symbol=Anxa4 29 kDa protein

---

132. [IPI00230108](#) Mass: 57099 Score: 52 Queries matched: 1 emPAI: 0.05

Tax\_Id=10090 Gene\_Symbol=Pdia3 Protein disulfide-isomerase A3 precursor

Check to include this hit in error tolerant search or archive report

| Query                                                    | Observed | Mr(expt)  | Mr(calc)  | ppm  | Miss | Score | Expect  | Rank | Peptide                                             |
|----------------------------------------------------------|----------|-----------|-----------|------|------|-------|---------|------|-----------------------------------------------------|
| <input checked="" type="checkbox"/> <a href="#">1924</a> | 427.9443 | 1280.8112 | 1280.8067 | 3.47 | 1    | 52    | 0.00052 | 1    | K_LSKDPNIVIAK.M + 2 Dimethyl (K); Dimethyl (N-term) |

---

133. [IPI00462934](#) Mass: 77218 Score: 52 Queries matched: 3 emPAI: 0.10

Tax\_Id=10090 Gene\_Symbol=Khsrp Far upstream element-binding protein 2

Check to include this hit in error tolerant search or archive report

| Query                                                    | Observed | Mr(expt)  | Mr(calc)  | ppm  | Miss | Score | Expect | Rank | Peptide                                   |
|----------------------------------------------------------|----------|-----------|-----------|------|------|-------|--------|------|-------------------------------------------|
| <input checked="" type="checkbox"/> <a href="#">872</a>  | 476.2921 | 950.5697  | 950.5662  | 3.75 | 0    | (37)  | 0.033  | 1    | R_HSVGVVIGR.S + Dimethyl (N-term)         |
| <input checked="" type="checkbox"/> <a href="#">879</a>  | 478.3047 | 954.5948  | 954.5913  | 3.71 | 0    | 37    | 0.029  | 1    | R_HSVGVVIGR.S + Dimethyl:2H(4) (N-term)   |
| <input checked="" type="checkbox"/> <a href="#">1272</a> | 549.3371 | 1096.6596 | 1096.6543 | 4.89 | 0    | 32    | 0.1    | 1    | R_VGGGIDVPVPR.H + Dimethyl:2H(4) (N-term) |

Proteins matching the same set of peptides:

[IPI00876559](#) Mass: 68960 Score: 52 Queries matched: 3

Tax\_Id=10090 Gene\_Symbol=Khsrp KH type splicing regulatory protein KSRP

---

134. [IPI00224626](#) Mass: 50959 Score: 52 Queries matched: 2 emPAI: 0.10

Tax\_Id=10090 Gene\_Symbol=Sept7 cell division cycle 10 homolog

Check to include this hit in error tolerant search or archive report

| Query                                                    | Observed | Mr(expt)  | Mr(calc)  | ppm  | Miss | Score | Expect | Rank | Peptide                                                      |
|----------------------------------------------------------|----------|-----------|-----------|------|------|-------|--------|------|--------------------------------------------------------------|
| <input checked="" type="checkbox"/> <a href="#">1825</a> | 415.5676 | 1243.6809 | 1243.6772 | 2.97 | 1    | (42)  | 0.014  | 1    | K_LKDSEAEIQR.R + Dimethyl (K); Dimethyl (N-term)             |
| <input checked="" type="checkbox"/> <a href="#">1845</a> | 418.2509 | 1251.7308 | 1251.7274 | 2.73 | 1    | 43    | 0.0088 | 1    | K_LKDSEAEIQR.R + Dimethyl:2H(4) (K); Dimethyl:2H(4) (N-term) |

Proteins matching the same set of peptides:

[IPI00874440](#) Mass: 50860 Score: 52 Queries matched: 2  
Tax\_Id=10090 Gene\_Symbol=Sept7 Septin-7

135. [IPI00116498](#) Mass: 27925 Score: 51 Queries matched: 2 emPAI: 0.19  
Tax\_Id=10090 Gene\_Symbol=Ywhaz 14-3-3 protein zeta/delta

Check to include this hit in error tolerant search or archive report

| Query                                                    | Observed | Mr(expt)  | Mr(calc)  | ppm  | Miss | Score | Expect | Rank | Peptide                                                          |
|----------------------------------------------------------|----------|-----------|-----------|------|------|-------|--------|------|------------------------------------------------------------------|
| <input type="checkbox"/> <a href="#">910</a>             | 486.3246 | 970.6347  | 970.6303  | 4.62 | 0    | 32    | 0.063  | 1    | R_NLLSVAYK.N + Dimethyl:2H(4) (K); Dimethyl:2H(4) (N-term)       |
| <input checked="" type="checkbox"/> <a href="#">2188</a> | 459.2805 | 1374.8195 | 1374.8148 | 3.46 | 1    | 51    | 0.0014 | 1    | R_YLAEVAAGDDKK.G + 2 Dimethyl:2H(4) (K); Dimethyl:2H(4) (N-term) |

Proteins matching the same set of peptides:

[IPI00853851](#) Mass: 24370 Score: 51 Queries matched: 2  
Tax\_Id=10090 Gene\_Symbol=LOC100047236 similar to 14-3-3 zeta

136. [IPI00308885](#) Mass: 61088 Score: 50 Queries matched: 2 emPAI: 0.04  
Tax\_Id=10090 Gene\_Symbol=Hspd1 Isoform 1 of 60 kDa heat shock protein, mitochondrial precursor

Check to include this hit in error tolerant search or archive report

| Query                                                    | Observed | Mr(expt)  | Mr(calc)  | ppm  | Miss | Score | Expect | Rank | Peptide                                               |
|----------------------------------------------------------|----------|-----------|-----------|------|------|-------|--------|------|-------------------------------------------------------|
| <input checked="" type="checkbox"/> <a href="#">886</a>  | 479.3046 | 956.5946  | 956.5906  | 4.20 | 0    | 33    | 0.084  | 1    | K_LSDGVAVLK.V + Dimethyl (K); Dimethyl (N-term)       |
| <input checked="" type="checkbox"/> <a href="#">2408</a> | 482.6011 | 1444.7814 | 1444.7773 | 2.82 | 1    | 50    | 0.0023 | 1    | K_VGGTSDVEVNEKK.D + 2 Dimethyl (K); Dimethyl (N-term) |

Proteins matching the same set of peptides:

[IPI00461249](#) Mass: 61188 Score: 50 Queries matched: 2  
Tax\_Id=10090 Gene\_Symbol=Hspd1 similar to Heat shock protein 1

[IPI00845678](#) Mass: 27112 Score: 50 Queries matched: 2  
Tax\_Id=10090 Gene\_Symbol=Hspd1 Isoform 2 of 60 kDa heat shock protein, mitochondrial precursor

137. [IPI00314191](#) Mass: 30907 Score: 46 Queries matched: 2 emPAI: 0.08  
Tax\_Id=10090 Gene\_Symbol=Cbr1 Carbonyl reductase [NADPH] 1

Check to include this hit in error tolerant search or archive report

| Query                                                    | Observed | Mr(expt)  | Mr(calc)  | ppm  | Miss | Score | Expect | Rank | Peptide                                 |
|----------------------------------------------------------|----------|-----------|-----------|------|------|-------|--------|------|-----------------------------------------|
| <input checked="" type="checkbox"/> <a href="#">1003</a> | 499.7871 | 997.5597  | 997.5556  | 4.11 | 0    | 46    | 0.0031 | 1    | K_LQAEGLSPR.F + Dimethyl (N-term)       |
| <input checked="" type="checkbox"/> <a href="#">1032</a> | 501.7994 | 1001.5843 | 1001.5807 | 3.58 | 0    | (34)  | 0.084  | 1    | K_LQAEGLSPR.F + Dimethyl:2H(4) (N-term) |

138. [IPI00378438](#) Mass: 202911 Score: 45 Queries matched: 2 emPAI: 0.03  
Tax\_Id=10090 Gene\_Symbol=Tns1 tensin 1

Check to include this hit in error tolerant search or archive report

| Query                                                    | Observed | Mr(expt)  | Mr(calc)  | ppm  | Miss | Score | Expect | Rank | Peptide                                  |
|----------------------------------------------------------|----------|-----------|-----------|------|------|-------|--------|------|------------------------------------------|
| <input checked="" type="checkbox"/> <a href="#">843</a>  | 471.7650 | 941.5154  | 941.5120  | 3.57 | 0    | 38    | 0.018  | 1    | R_SYVESVAR.T + Dimethyl:2H(4) (N-term)   |
| <input checked="" type="checkbox"/> <a href="#">4184</a> | 585.5518 | 2338.1782 | 2338.1679 | 4.40 | 1    | 37    | 0.038  | 1    | R_GLNSWQQQPHPPRQQR.S + Dimethyl (N-term) |

139. [IPI00118678](#) Mass: 60930 Score: 45 Queries matched: 2 emPAI: 0.09

Tax\_Id=10090 Gene\_Symbol=Tcp1 T-complex protein 1 subunit alpha A

Check to include this hit in error tolerant search or archive report

| Query                                                    | Observed | Mr(expt)  | Mr(calc)  | ppm  | Miss | Score | Expect | Rank | Peptide                                                                          |
|----------------------------------------------------------|----------|-----------|-----------|------|------|-------|--------|------|----------------------------------------------------------------------------------|
| <input checked="" type="checkbox"/> <a href="#">2792</a> | 399.7137 | 1594.8259 | 1594.8215 | 2.71 | 1    | (40)  | 0.016  | 1    | R_AFHNEAQVNP <small>ERK</small> .N + Dimethyl (K); Dimethyl (N-term)             |
| <input checked="" type="checkbox"/> <a href="#">2804</a> | 401.7263 | 1602.8763 | 1602.8718 | 2.81 | 1    | 41    | 0.02   | 1    | R_AFHNEAQVNP <small>ERK</small> .N + Dimethyl:2H(4) (K); Dimethyl:2H(4) (N-term) |

Proteins matching the same set of peptides:

[IPI00459493](#) Mass: 60867 Score: 45 Queries matched: 2

Tax\_Id=10090 Gene\_Symbol=Tcp1 Isoform 1 of T-complex protein 1 subunit alpha B

[IPI00845611](#) Mass: 55880 Score: 45 Queries matched: 2

Tax\_Id=10090 Gene\_Symbol=Tcp1 Isoform 2 of T-complex protein 1 subunit alpha B

---

140. [IPI00223253](#) Mass: 51230 Score: 45 Queries matched: 2 emPAI: 0.10

Tax\_Id=10090 Gene\_Symbol=Hnrpk Isoform 1 of Heterogeneous nuclear ribonucleoprotein K

Check to include this hit in error tolerant search or archive report

| Query                                                   | Observed | Mr(expt) | Mr(calc) | ppm  | Miss | Score | Expect | Rank | Peptide                                                     |
|---------------------------------------------------------|----------|----------|----------|------|------|-------|--------|------|-------------------------------------------------------------|
| <input checked="" type="checkbox"/> <a href="#">817</a> | 465.2894 | 928.5642 | 928.5593 | 5.25 | 0    | 39    | 0.025  | 1    | K_DLAGSIIGK.G + Dimethyl (K); Dimethyl (N-term)             |
| <input checked="" type="checkbox"/> <a href="#">832</a> | 469.3146 | 936.6147 | 936.6095 | 5.53 | 0    | (32)  | 0.097  | 1    | K_DLAGSIIGK.G + Dimethyl:2H(4) (K); Dimethyl:2H(4) (N-term) |

Proteins matching the same set of peptides:

[IPI00224575](#) Mass: 51281 Score: 45 Queries matched: 2

Tax\_Id=10090 Gene\_Symbol=Hnrpk Isoform 2 of Heterogeneous nuclear ribonucleoprotein K

[IPI00465574](#) Mass: 51259 Score: 45 Queries matched: 2

Tax\_Id=10090 Gene\_Symbol=Hnrpk Bone marrow macrophage cDNA, RIKEN full-length enriched library, clone:I830091E20 product:heterogeneous nuclear ribonucleoprotein K,

[IPI00761237](#) Mass: 51186 Score: 45 Queries matched: 2

Tax\_Id=10090 Gene\_Symbol=- 51 kDa protein

[IPI00875420](#) Mass: 48664 Score: 45 Queries matched: 2

Tax\_Id=10090 Gene\_Symbol=- 48 kDa protein

---

141. [IPI00115679](#) Mass: 109791 Score: 45 Queries matched: 3 emPAI: 0.02

Tax\_Id=10090 Gene\_Symbol=Ganab Isoform 2 of Neutral alpha-glucosidase AB precursor

Check to include this hit in error tolerant search or archive report

| Query                                                    | Observed | Mr(expt)  | Mr(calc)  | ppm  | Miss | Score | Expect | Rank | Peptide                                       |
|----------------------------------------------------------|----------|-----------|-----------|------|------|-------|--------|------|-----------------------------------------------|
| <input checked="" type="checkbox"/> <a href="#">1009</a> | 500.8139 | 999.6132  | 999.6077  | 5.55 | 0    | 45    | 0.006  | 1    | R_SLLLSVNAR.G + Dimethyl (N-term)             |
| <input checked="" type="checkbox"/> <a href="#">3057</a> | 566.3208 | 1695.9406 | 1695.9308 | 5.76 | 1    | 30    | 0.24   | 1    | R_YRVPDVLVADPPTAR.L + Dimethyl (N-term)       |
| <input checked="" type="checkbox"/> <a href="#">3070</a> | 567.6622 | 1699.9647 | 1699.9559 | 5.18 | 1    | (25)  | 0.61   | 1    | R_YRVPDVLVADPPTAR.L + Dimethyl:2H(4) (N-term) |

Proteins matching the same set of peptides:

[IPI00403058](#) Mass: 107300 Score: 45 Queries matched: 3

Tax\_Id=10090 Gene\_Symbol=Ganab Isoform 1 of Neutral alpha-glucosidase AB precursor

---

142. [IPI00751017](#) Score: 43 Queries matched: 3

Tax\_Id=10090 Gene\_Symbol=A230067G21Rik 99 kDa protein

 Check to include this hit in error tolerant search or archive report

| Query                | Observed | Mr(expt)  | Mr(calc)  | ppm   | Miss | Score | Expect | Rank | Peptide                                                            |
|----------------------|----------|-----------|-----------|-------|------|-------|--------|------|--------------------------------------------------------------------|
| <a href="#">1245</a> | 543.2912 | 1084.5678 | 1084.5779 | -9.31 | 0    | 40    | 0.011  | 2    | _ <u>MFASWLFK</u> .A + Dimethyl (K); Dimethyl (N-term)             |
| <a href="#">1259</a> | 547.3163 | 1092.6181 | 1092.6282 | -9.19 | 0    | (26)  | 0.43   | 2    | _ <u>MFASWLFK</u> .A + Dimethyl:2H(4) (K); Dimethyl:2H(4) (N-term) |
| <a href="#">1260</a> | 547.3163 | 1092.6181 | 1092.6282 | -9.19 | 0    | (37)  | 0.033  | 2    | _ <u>MFASWLFK</u> .A + Dimethyl:2H(4) (K); Dimethyl:2H(4) (N-term) |

Proteins matching the same set of peptides:

|                             |           |                    |
|-----------------------------|-----------|--------------------|
| <a href="#">IPI00756343</a> | Score: 43 | Queries matched: 3 |
| <a href="#">IPI00845657</a> | Score: 43 | Queries matched: 3 |

143. [IPI00109600](#) Mass: 48308 Score: 43 Queries matched: 2 emPAI: 0.05

Tax\_Id=10090 Gene\_Symbol=2410004A20Rik ES cells cDNA, RIKEN full-length enriched library, clone:2410004A20 product:hypothetical Alanine-rich region containing prot

 Check to include this hit in error tolerant search or archive report

| Query                                                    | Observed | Mr(expt)  | Mr(calc)  | ppm  | Miss | Score | Expect | Rank | Peptide                                          |
|----------------------------------------------------------|----------|-----------|-----------|------|------|-------|--------|------|--------------------------------------------------|
| <input checked="" type="checkbox"/> <a href="#">3160</a> | 582.9787 | 1745.9143 | 1745.9055 | 5.01 | 1    | (28)  | 0.36   | 1    | R_ <u>MKLMEIEALEAGVER</u> .R + Dimethyl (K)      |
| <input checked="" type="checkbox"/> <a href="#">3161</a> | 873.9658 | 1745.9171 | 1745.9055 | 6.62 | 1    | 43    | 0.0099 | 1    | R_ <u>MKLMEIEALEAGVER</u> .R + Dimethyl (N-term) |

Proteins matching the same set of peptides:

|                                           |             |           |                    |
|-------------------------------------------|-------------|-----------|--------------------|
| <a href="#">IPI00874395</a>               | Mass: 45827 | Score: 43 | Queries matched: 2 |
| Tax_Id=10090 Gene_Symbol=- OEPP48 variant |             |           |                    |

144. [IPI00136703](#) Mass: 42971 Score: 43 Queries matched: 2 emPAI: 0.12

Tax\_Id=10090 Gene\_Symbol=Ckb Creatine kinase B-type

 Check to include this hit in error tolerant search or archive report

| Query                                                    | Observed | Mr(expt)  | Mr(calc)  | ppm  | Miss | Score | Expect | Rank | Peptide                                            |
|----------------------------------------------------------|----------|-----------|-----------|------|------|-------|--------|------|----------------------------------------------------|
| <input checked="" type="checkbox"/> <a href="#">2064</a> | 666.3866 | 1330.7587 | 1330.7496 | 6.84 | 0    | (32)  | 0.13   | 1    | K_ <u>VLTPELYAELR</u> .A + Dimethyl (N-term)       |
| <input checked="" type="checkbox"/> <a href="#">2082</a> | 668.3992 | 1334.7839 | 1334.7747 | 6.88 | 0    | 39    | 0.026  | 1    | K_ <u>VLTPELYAELR</u> .A + Dimethyl:2H(4) (N-term) |

145. [IPI00154054](#) Mass: 45129 Score: 43 Queries matched: 3 emPAI: 0.06

Tax\_Id=10090 Gene\_Symbol=Acat1 Acetyl-CoA acetyltransferase, mitochondrial precursor

 Check to include this hit in error tolerant search or archive report

| Query                                                    | Observed | Mr(expt)  | Mr(calc)  | ppm  | Miss | Score | Expect | Rank | Peptide                                                                      |
|----------------------------------------------------------|----------|-----------|-----------|------|------|-------|--------|------|------------------------------------------------------------------------------|
| <input checked="" type="checkbox"/> <a href="#">3120</a> | 577.6645 | 1729.9717 | 1729.9614 | 5.95 | 0    | 40    | 0.023  | 1    | R_ <u>TPIGSFLGSLASQPATK</u> .L + Dimethyl (K); Dimethyl (N-term)             |
| <input checked="" type="checkbox"/> <a href="#">3121</a> | 577.6645 | 1729.9718 | 1729.9614 | 6.01 | 0    | (36)  | 0.053  | 1    | R_ <u>TPIGSFLGSLASQPATK</u> .L + Dimethyl (K); Dimethyl (N-term)             |
| <input checked="" type="checkbox"/> <a href="#">3141</a> | 580.3477 | 1738.0211 | 1738.0117 | 5.46 | 0    | (33)  | 0.08   | 1    | R_ <u>TPIGSFLGSLASQPATK</u> .L + Dimethyl:2H(4) (K); Dimethyl:2H(4) (N-term) |

146. [IPI00172328](#) Mass: 544766 Score: 43 Queries matched: 1 emPAI: 0.00

Tax\_Id=10090 Gene\_Symbol=Dnahc8 Isoform 1 of Ciliary dynein heavy chain 8

 Check to include this hit in error tolerant search or archive report

| Query                | Observed | Mr(expt)  | Mr(calc)  | ppm   | Miss | Score | Expect | Rank | Peptide                                          |
|----------------------|----------|-----------|-----------|-------|------|-------|--------|------|--------------------------------------------------|
| <a href="#">2868</a> | 544.6272 | 1630.8597 | 1630.8712 | -7.05 | 1    | 43    | 0.011  | 3    | R.RSMTGIPNLQETLK.E + Dimethyl (K); Oxidation (M) |

Proteins matching the same set of peptides:

[IPI00652480](#) Score: 43 Queries matched: 1  
[IPI00750189](#) Mass: 483380 Score: 43 Queries matched: 1  
Tax\_Id=10090 Gene\_Symbol=Dnahc8 Isoform 2 of Ciliary dynein heavy chain 8

147. [IPI00229988](#) Mass: 98458 Score: 42 Queries matched: 2 emPAI: 0.05  
Tax\_Id=10090 Gene\_Symbol=Eif2c2 Eukaryotic translation initiation factor 2C 2

Check to include this hit in error tolerant search or archive report

| Query                                                    | Observed | Mr(expt)  | Mr(calc)  | ppm  | Miss | Score | Expect | Rank | Peptide                                               |
|----------------------------------------------------------|----------|-----------|-----------|------|------|-------|--------|------|-------------------------------------------------------|
| <input checked="" type="checkbox"/> <a href="#">1560</a> | 398.8922 | 1193.6547 | 1193.6517 | 2.55 | 0    | (34)  | 0.067  | 1    | K <sub>2</sub> AVQVHQDTLR.T + Dimethyl (N-term)       |
| <input checked="" type="checkbox"/> <a href="#">1577</a> | 400.2339 | 1197.6800 | 1197.6768 | 2.69 | 0    | 38    | 0.028  | 1    | K <sub>2</sub> AVQVHQDTLR.T + Dimethyl:2H(4) (N-term) |

Proteins matching the same set of peptides:

[IPI00229989](#) Mass: 98236 Score: 42 Queries matched: 2  
Tax\_Id=10090 Gene\_Symbol=Eif2c1 Eukaryotic translation initiation factor 2C 1

148. [IPI00553798](#) Mass: 604664 Score: 42 Queries matched: 2 emPAI: 0.01  
Tax\_Id=10090 Gene\_Symbol=Ahnak AHNAK nucleoprotein isoform 1

Check to include this hit in error tolerant search or archive report

| Query                                                    | Observed | Mr(expt)  | Mr(calc)  | ppm  | Miss | Score | Expect | Rank | Peptide                                                                         |
|----------------------------------------------------------|----------|-----------|-----------|------|------|-------|--------|------|---------------------------------------------------------------------------------|
| <input checked="" type="checkbox"/> <a href="#">2850</a> | 542.3188 | 1623.9347 | 1623.9269 | 4.80 | 1    | 37    | 0.04   | 1    | K <sub>2</sub> ISMFDIDLNLKGPV.V + 2 Dimethyl (K); Dimethyl (N-term)             |
| <input checked="" type="checkbox"/> <a href="#">2892</a> | 546.3442 | 1636.0109 | 1636.0023 | 5.26 | 1    | (35)  | 0.029  | 1    | K <sub>2</sub> ISMFDIDLNLKGPV.V + 2 Dimethyl:2H(4) (K); Dimethyl:2H(4) (N-term) |

149. [IPI00348328](#) Mass: 114018 Score: 42 Queries matched: 1 emPAI: 0.02  
Tax\_Id=10090 Gene\_Symbol=Krt78 keratin Kb40

Check to include this hit in error tolerant search or archive report

| Query                                                    | Observed | Mr(expt)  | Mr(calc)  | ppm  | Miss | Score | Expect | Rank | Peptide                                                           |
|----------------------------------------------------------|----------|-----------|-----------|------|------|-------|--------|------|-------------------------------------------------------------------|
| <input checked="" type="checkbox"/> <a href="#">3052</a> | 565.6494 | 1693.9264 | 1693.9151 | 6.66 | 1    | 42    | 0.015  | 1    | R <sub>2</sub> SLNNQFASFIDKVR.F + Dimethyl (K); Dimethyl (N-term) |

150. [IPI00469952](#) Mass: 147823 Score: 42 Queries matched: 5 emPAI: 0.04  
Tax\_Id=10090 Gene\_Symbol=Prx Isoform 1 of Periaxin

Check to include this hit in error tolerant search or archive report

| Query                                                    | Observed | Mr(expt)  | Mr(calc)  | ppm  | Miss | Score | Expect | Rank | Peptide                                                                |
|----------------------------------------------------------|----------|-----------|-----------|------|------|-------|--------|------|------------------------------------------------------------------------|
| <input checked="" type="checkbox"/> <a href="#">745</a>  | 435.3030 | 868.5915  | 868.5874  | 4.80 | 0    | 26    | 0.2    | 1    | K <sub>2</sub> FTISLPK.A + Dimethyl:2H(4) (K); Dimethyl:2H(4) (N-term) |
| <input checked="" type="checkbox"/> <a href="#">1317</a> | 371.2336 | 1110.6791 | 1110.6761 | 2.72 | 1    | 29    | 0.17   | 1    | K <sub>2</sub> LSKVPEVQR.K + Dimethyl (K); Dimethyl (N-term)           |
| <input checked="" type="checkbox"/> <a href="#">1802</a> | 413.2462 | 1236.7168 | 1236.7118 | 4.06 | 1    | 30    | 0.18   | 1    | K <sub>2</sub> GTEFSFKLPK.M + 2 Dimethyl (K); Dimethyl (N-term)        |
| <input checked="" type="checkbox"/> <a href="#">2217</a> | 462.2575 | 1383.7507 | 1383.7470 | 2.69 | 1    | 44    | 0.0074 | 1    | R <sub>2</sub> VREVAEEAQVAR.M + Dimethyl (N-term)                      |
| <input checked="" type="checkbox"/> <a href="#">2225</a> | 463.5994 | 1387.7764 | 1387.7721 | 3.06 | 1    | (33)  | 0.096  | 1    | R <sub>2</sub> VREVAEEAQVAR.M + Dimethyl:2H(4) (N-term)                |

Proteins matching the same set of peptides:

[IPI00762284](#) Mass: 147780 Score: 42 Queries matched: 5

Tax\_Id=10090 Gene\_Symbol=Prx Prx protein

---

151. [IPI00119818](#) Mass: 100375 Score: 41 Queries matched: 1 emPAI: 0.03

Tax\_Id=10090 Gene\_Symbol=Itih4 Adult male liver cDNA, RIKEN full-length enriched library, clone:1300004A21 product:inter alpha-trypsin inhibitor, heavy chain 4, fu

Check to include this hit in error tolerant search or archive report

| Query                                                    | Observed | Mr(expt)  | Mr(calc)  | ppm  | Miss | Score | Expect | Rank | Peptide                                                        |
|----------------------------------------------------------|----------|-----------|-----------|------|------|-------|--------|------|----------------------------------------------------------------|
| <input checked="" type="checkbox"/> <a href="#">1967</a> | 434.2854 | 1299.8344 | 1299.8304 | 3.06 | 0    | 41    | 0.0064 | 1    | R_FKPTLSQQQK.S + 2 Dimethyl:2H(4) (K); Dimethyl:2H(4) (N-term) |

Proteins matching the same set of peptides:

[IPI00312711](#) Mass: 104774 Score: 41 Queries matched: 1

Tax\_Id=10090 Gene\_Symbol=Itih4 PK-120

---

152. [IPI00125971](#) Mass: 44430 Score: 41 Queries matched: 1 emPAI: 0.06

Tax\_Id=10090 Gene\_Symbol=Psmc6 26S protease regulatory subunit S10B

Check to include this hit in error tolerant search or archive report

| Query                                                    | Observed | Mr(expt)  | Mr(calc)  | ppm  | Miss | Score | Expect | Rank | Peptide                                     |
|----------------------------------------------------------|----------|-----------|-----------|------|------|-------|--------|------|---------------------------------------------|
| <input checked="" type="checkbox"/> <a href="#">2657</a> | 509.9301 | 1526.7686 | 1526.7627 | 3.88 | 1    | 41    | 0.0095 | 1    | R_FSEGTSADREIQR.T + Dimethyl:2H(4) (N-term) |

---

153. [IPI00110588](#) Mass: 67839 Score: 41 Queries matched: 3 emPAI: 0.04

Tax\_Id=10090 Gene\_Symbol=Msn Moesin

Check to include this hit in error tolerant search or archive report

| Query                                                    | Observed | Mr(expt)  | Mr(calc)  | ppm  | Miss | Score | Expect | Rank | Peptide                                                        |
|----------------------------------------------------------|----------|-----------|-----------|------|------|-------|--------|------|----------------------------------------------------------------|
| <input checked="" type="checkbox"/> <a href="#">1056</a> | 508.2765 | 1014.5385 | 1014.5345 | 3.90 | 0    | 41    | 0.01   | 1    | R_ALELEQER.K + Dimethyl (N-term)                               |
| <input checked="" type="checkbox"/> <a href="#">1063</a> | 510.2891 | 1018.5637 | 1018.5596 | 4.00 | 0    | (31)  | 0.13   | 1    | R_ALELEQER.K + Dimethyl:2H(4) (N-term)                         |
| <input checked="" type="checkbox"/> <a href="#">2767</a> | 395.7314 | 1578.8964 | 1578.8929 | 2.24 | 2    | 32    | 0.12   | 1    | K_KAQQELEEQTRR.A + Dimethyl:2H(4) (K); Dimethyl:2H(4) (N-term) |

---

154. [IPI00116283](#) Mass: 61162 Score: 41 Queries matched: 1 emPAI: 0.04

Tax\_Id=10090 Gene\_Symbol=Cct3 T-complex protein 1 subunit gamma

Check to include this hit in error tolerant search or archive report

| Query                                                    | Observed | Mr(expt)  | Mr(calc)  | ppm  | Miss | Score | Expect | Rank | Peptide                                                       |
|----------------------------------------------------------|----------|-----------|-----------|------|------|-------|--------|------|---------------------------------------------------------------|
| <input checked="" type="checkbox"/> <a href="#">1537</a> | 395.5806 | 1183.7200 | 1183.7165 | 2.96 | 0    | 41    | 0.017  | 1    | R_EIQVQHPPAAK.S + Dimethyl:2H(4) (K); Dimethyl:2H(4) (N-term) |

---

155. [IPI00116281](#) Mass: 58424 Score: 40 Queries matched: 1 emPAI: 0.04

Tax\_Id=10090 Gene\_Symbol=Cct6a T-complex protein 1 subunit zeta

Check to include this hit in error tolerant search or archive report

| Query | Observed | Mr(expt) | Mr(calc) | ppm | Miss | Score | Expect | Rank | Peptide |
|-------|----------|----------|----------|-----|------|-------|--------|------|---------|
|-------|----------|----------|----------|-----|------|-------|--------|------|---------|



[653](#) 416.7648 831.5151 831.5116 4.14 0 40 0.012 1 [R\\_GLQDVL.R + Dimethyl:2H\(4\) \(N-term\)](#)

---

156. [IPI00408258](#) Mass: 174129 Score: 40 Queries matched: 1 emPAI: 0.01

Tax\_Id=10090 Gene\_Symbol=Btbd12 BTB (POZ) domain containing 12

Check to include this hit in error tolerant search or archive report

| Query                | Observed | Mr(expt)  | Mr(calc)  | ppm  | Miss | Score | Expect | Rank | Peptide                                                              |
|----------------------|----------|-----------|-----------|------|------|-------|--------|------|----------------------------------------------------------------------|
| <a href="#">2600</a> | 503.3082 | 1506.9028 | 1506.8894 | 8.87 | 1    | 40    | 0.015  | 2    | <a href="#">K.NLPPKVPITPMR.Y + Dimethyl:2H(4) (K); Oxidation (M)</a> |

---

157. [IPI00330476](#) Mass: 146801 Score: 40 Queries matched: 1 emPAI: 0.02

Tax\_Id=10090 Gene\_Symbol=Cyfipl Isoform 1 of Cytoplasmic FMR1-interacting protein 1

Check to include this hit in error tolerant search or archive report

| Query                                                    | Observed | Mr(expt)  | Mr(calc)  | ppm  | Miss | Score | Expect | Rank | Peptide                                             |
|----------------------------------------------------------|----------|-----------|-----------|------|------|-------|--------|------|-----------------------------------------------------|
| <input checked="" type="checkbox"/> <a href="#">2198</a> | 690.3730 | 1378.7314 | 1378.7245 | 5.02 | 0    | 40    | 0.019  | 1    | <a href="#">R_TVLPFSQEFQR.D + Dimethyl (N-term)</a> |

Proteins matching the same set of peptides:

[IPI00831544](#) Mass: 146537 Score: 40 Queries matched: 1

Tax\_Id=10090 Gene\_Symbol=Cyfipl Isoform 2 of Cytoplasmic FMR1-interacting protein 1

---

158. [IPI00315948](#) Mass: 27654 Score: 40 Queries matched: 1 emPAI: 0.09

Tax\_Id=10090 Gene\_Symbol=Tbcb Tubulin folding cofactor B

Check to include this hit in error tolerant search or archive report

| Query                                                    | Observed | Mr(expt)  | Mr(calc)  | ppm  | Miss | Score | Expect | Rank | Peptide                                                                          |
|----------------------------------------------------------|----------|-----------|-----------|------|------|-------|--------|------|----------------------------------------------------------------------------------|
| <input checked="" type="checkbox"/> <a href="#">3058</a> | 566.3300 | 1695.9682 | 1695.9606 | 4.47 | 1    | 40    | 0.022  | 1    | <a href="#">R_LSEKQAQSAISVGS.R + Dimethyl:2H(4) (K); Dimethyl:2H(4) (N-term)</a> |

---

159. [IPI00458583](#) Mass: 88661 Score: 39 Queries matched: 1 emPAI: 0.03

Tax\_Id=10090 Gene\_Symbol=Hnrnpu Osteoclast-like cell cDNA, RIKEN full-length enriched library, clone:I420039N16 product: heterogeneous nuclear ribonucleoprotein U,

Check to include this hit in error tolerant search or archive report

| Query                                                    | Observed | Mr(expt)  | Mr(calc)  | ppm  | Miss | Score | Expect | Rank | Peptide                                                    |
|----------------------------------------------------------|----------|-----------|-----------|------|------|-------|--------|------|------------------------------------------------------------|
| <input checked="" type="checkbox"/> <a href="#">3148</a> | 581.6559 | 1741.9458 | 1741.9363 | 5.47 | 0    | 39    | 0.029  | 1    | <a href="#">K_SSGPTSLFAVTVAPPGAR.Q + Dimethyl (N-term)</a> |

---

160. [IPI00223224](#) Mass: 14508 Score: 38 Queries matched: 1 emPAI: 0.18

Tax\_Id=10090 Gene\_Symbol=D130079A08Rik 12 days embryo spinal ganglion cDNA, RIKEN full-length enriched library, clone:D130079A08 product: hypothetical protein, full

Check to include this hit in error tolerant search or archive report

| Query                                                   | Observed | Mr(expt) | Mr(calc) | ppm   | Miss | Score | Expect | Rank | Peptide                                          |
|---------------------------------------------------------|----------|----------|----------|-------|------|-------|--------|------|--------------------------------------------------|
| <input checked="" type="checkbox"/> <a href="#">816</a> | 465.2616 | 928.5087 | 928.5090 | -0.30 | 0    | 38    | 0.017  | 1    | <a href="#">R_SSEVARPR.R + Dimethyl (N-term)</a> |

---

161. [IPI00762122](#) Mass: 464816 Score: 38 Queries matched: 1 emPAI: 0.01

Tax\_Id=10090 Gene\_Symbol=- 462 kDa protein

Check to include this hit in error tolerant search or archive report

| Query                | Observed | Mr(expt)  | Mr(calc)  | ppm  | Miss | Score | Expect | Rank | Peptide                                                              |
|----------------------|----------|-----------|-----------|------|------|-------|--------|------|----------------------------------------------------------------------|
| <a href="#">2868</a> | 544.6272 | 1630.8597 | 1630.8575 | 1.37 | 1    | 38    | 0.036  | 4    | K_MPARFLPQLPMDK.L + Dimethyl (K); Dimethyl (N-term); 2 Oxidation (M) |

---

162. [IPI00121892](#) Mass: 251741 Score: 37 Queries matched: 2 emPAI: 0.02

Tax\_Id=10090 Gene\_Symbol=Spnb2 Isoform 2 of Spectrin beta chain, brain 1

Check to include this hit in error tolerant search or archive report

| Query                                                    | Observed | Mr(expt)  | Mr(calc)  | ppm  | Miss | Score | Expect | Rank | Peptide                                 |
|----------------------------------------------------------|----------|-----------|-----------|------|------|-------|--------|------|-----------------------------------------|
| <input checked="" type="checkbox"/> <a href="#">1002</a> | 499.3134 | 996.6123  | 996.6080  | 4.29 | 0    | (29)  | 0.14   | 1    | R_VAVVNQIAR.Q + Dimethyl (N-term)       |
| <input checked="" type="checkbox"/> <a href="#">1031</a> | 501.3258 | 1000.6371 | 1000.6331 | 3.93 | 0    | 36    | 0.034  | 1    | R_VAVVNQIAR.Q + Dimethyl:2H(4) (N-term) |

Proteins matching the same set of peptides:

[IPI00319830](#) Mass: 274908 Score: 37 Queries matched: 2  
Tax\_Id=10090 Gene\_Symbol=Spnb2 Isoform 1 of Spectrin beta chain, brain 1

[IPI00831369](#) Mass: 244840 Score: 37 Queries matched: 2  
Tax\_Id=10090 Gene\_Symbol=Spnb2 MKIAA4049 protein

---

163. [IPI00762403](#) Mass: 147882 Score: 36 Queries matched: 1 emPAI: 0.02

Tax\_Id=10090 Gene\_Symbol=Usp31 ubiquitin specific protease 31

Check to include this hit in error tolerant search or archive report

| Query                | Observed | Mr(expt)  | Mr(calc)  | ppm   | Miss | Score | Expect | Rank | Peptide                                                                   |
|----------------------|----------|-----------|-----------|-------|------|-------|--------|------|---------------------------------------------------------------------------|
| <a href="#">3105</a> | 574.6531 | 1720.9374 | 1720.9546 | -9.98 | 1    | 36    | 0.049  | 2    | -_MSKVTAPGPGPPVAAGGK.E + 2 Dimethyl (K); Dimethyl (N-term); Oxidation (M) |

---

164. [IPI00126072](#) Mass: 43297 Score: 36 Queries matched: 1 emPAI: 0.06

Tax\_Id=10090 Gene\_Symbol=Vat1 Synaptic vesicle membrane protein VAT-1 homolog

Check to include this hit in error tolerant search or archive report

| Query                                                    | Observed | Mr(expt)  | Mr(calc)  | ppm  | Miss | Score | Expect | Rank | Peptide                                                       |
|----------------------------------------------------------|----------|-----------|-----------|------|------|-------|--------|------|---------------------------------------------------------------|
| <input checked="" type="checkbox"/> <a href="#">1830</a> | 623.4023 | 1244.7901 | 1244.7832 | 5.60 | 1    | 36    | 0.026  | 1    | K_VLLVPGPEKET.- + Dimethyl:2H(4) (K); Dimethyl:2H(4) (N-term) |

---

165. [IPI00402968](#) Mass: 61307 Score: 35 Queries matched: 1 emPAI: 0.04

Tax\_Id=10090 Gene\_Symbol=Ehd2 13 days embryo forelimb cDNA, RIKEN full-length enriched library, clone:5930429A15 product:EH DOMAIN-CONTAINING PROTEIN-2 homolog

Check to include this hit in error tolerant search or archive report

| Query                                                    | Observed | Mr(expt)  | Mr(calc)  | ppm  | Miss | Score | Expect | Rank | Peptide                              |
|----------------------------------------------------------|----------|-----------|-----------|------|------|-------|--------|------|--------------------------------------|
| <input checked="" type="checkbox"/> <a href="#">2063</a> | 444.5876 | 1330.7411 | 1330.7357 | 4.05 | 0    | 35    | 0.059  | 1    | K_LEGHGLPTNLPR.R + Dimethyl (N-term) |

---

166. [IPI00461360](#) Mass: 110460 Score: 35 Queries matched: 1 emPAI: 0.02

Tax\_Id=10090 Gene\_Symbol=Ccdc39 Coiled-coil domain-containing protein 39

Check to include this hit in error tolerant search or archive report

| Query                                                    | Observed | Mr(expt)  | Mr(calc)  | ppm  | Miss | Score | Expect | Rank | Peptide                        |
|----------------------------------------------------------|----------|-----------|-----------|------|------|-------|--------|------|--------------------------------|
| <input checked="" type="checkbox"/> <a href="#">1228</a> | 359.2197 | 1074.6372 | 1074.6284 | 8.14 | 2    | 35    | 0.059  | 1    | R.SEKELSKAK.A + 2 Dimethyl (K) |

167. [IPI00131395](#) Mass: 96752 Score: 35 Queries matched: 2 emPAI: 0.03  
Tax\_Id=10090 Gene\_Symbol=Znf512b MKIAA1196 protein

Check to include this hit in error tolerant search or archive report

| Query                                                   | Observed | Mr(expt) | Mr(calc) | ppm   | Miss | Score | Expect | Rank | Peptide                                |
|---------------------------------------------------------|----------|----------|----------|-------|------|-------|--------|------|----------------------------------------|
| <input checked="" type="checkbox"/> <a href="#">717</a> | 430.7651 | 859.5157 | 859.5239 | -9.54 | 2    | 35    | 0.041  | 1    | K.SLSGGKKR.G + Dimethyl (N-term)       |
| <input checked="" type="checkbox"/> <a href="#">733</a> | 432.7777 | 863.5409 | 863.5490 | -9.47 | 2    | (28)  | 0.21   | 1    | K.SLSGGKKR.G + Dimethyl:2H(4) (N-term) |

Proteins matching the same set of peptides:

[IPI00756808](#) Mass: 121307 Score: 35 Queries matched: 2  
Tax\_Id=10090 Gene\_Symbol=Znf512b similar to mKIAA1196 protein

168. [IPI00120274](#) Mass: 44661 Score: 34 Queries matched: 1 emPAI: 0.06  
Tax\_Id=10090 Gene\_Symbol=Npcd;Cbx6 Chromobox protein homolog 6

Check to include this hit in error tolerant search or archive report

| Query                                                    | Observed | Mr(expt)  | Mr(calc)  | ppm   | Miss | Score | Expect | Rank | Peptide                                |
|----------------------------------------------------------|----------|-----------|-----------|-------|------|-------|--------|------|----------------------------------------|
| <input checked="" type="checkbox"/> <a href="#">2822</a> | 539.3262 | 1614.9567 | 1614.9569 | -0.12 | 2    | 34    | 0.056  | 1    | K.TFLLKARAQAEALR.I + Dimethyl (N-term) |

Proteins matching the same set of peptides:

[IPI00420763](#) Mass: 73456 Score: 34 Queries matched: 1  
Tax\_Id=10090 Gene\_Symbol=Cbx6 Neuronal pentraxin with chromo domain  
[IPI00464339](#) Mass: 52546 Score: 34 Queries matched: 1  
Tax\_Id=10090 Gene\_Symbol=Cbx6 Neuronal pentraxin 1.4 kb variant  
[IPI00751159](#) Mass: 73521 Score: 34 Queries matched: 1  
Tax\_Id=10090 Gene\_Symbol=Npcd 73 kDa protein  
[IPI00757836](#) Mass: 52483 Score: 34 Queries matched: 1  
Tax\_Id=10090 Gene\_Symbol=Npcd neuronal pentraxin with chromo domain isoform 2  
[IPI00776097](#) Mass: 15514 Score: 34 Queries matched: 1  
Tax\_Id=10090 Gene\_Symbol=Cbx6;Npcd 15 kDa protein

169. [IPI00132700](#) Mass: 21773 Score: 34 Queries matched: 1 emPAI: 0.12  
Tax\_Id=10090 Gene\_Symbol=Mrpl35 39S ribosomal protein L35, mitochondrial precursor

Check to include this hit in error tolerant search or archive report

| Query                                                    | Observed | Mr(expt)  | Mr(calc)  | ppm  | Miss | Score | Expect | Rank | Peptide       |
|----------------------------------------------------------|----------|-----------|-----------|------|------|-------|--------|------|---------------|
| <input checked="" type="checkbox"/> <a href="#">1185</a> | 351.8892 | 1052.6457 | 1052.6455 | 0.25 | 2    | 34    | 0.046  | 1    | R.KTVKSVVHR.F |

## Search Parameters

Type of search : MS/MS Ion Search  
 Enzyme : Trypsin  
 Fixed modifications : Carbamidomethyl (C)  
 Variable modifications : Dimethyl (K),Dimethyl (N-term),Dimethyl:2H(4) (K),Dimethyl:2H(4) (N-term),Oxidation (M)  
 Mass values : Monoisotopic  
 Protein Mass : Unrestricted  
 Peptide Mass Tolerance : ± 10 ppm  
 Fragment Mass Tolerance: ± 0.9 Da  
 Instrument type : Default  
 Number of queries : 4680

Figure S4, Raijmakers et al.

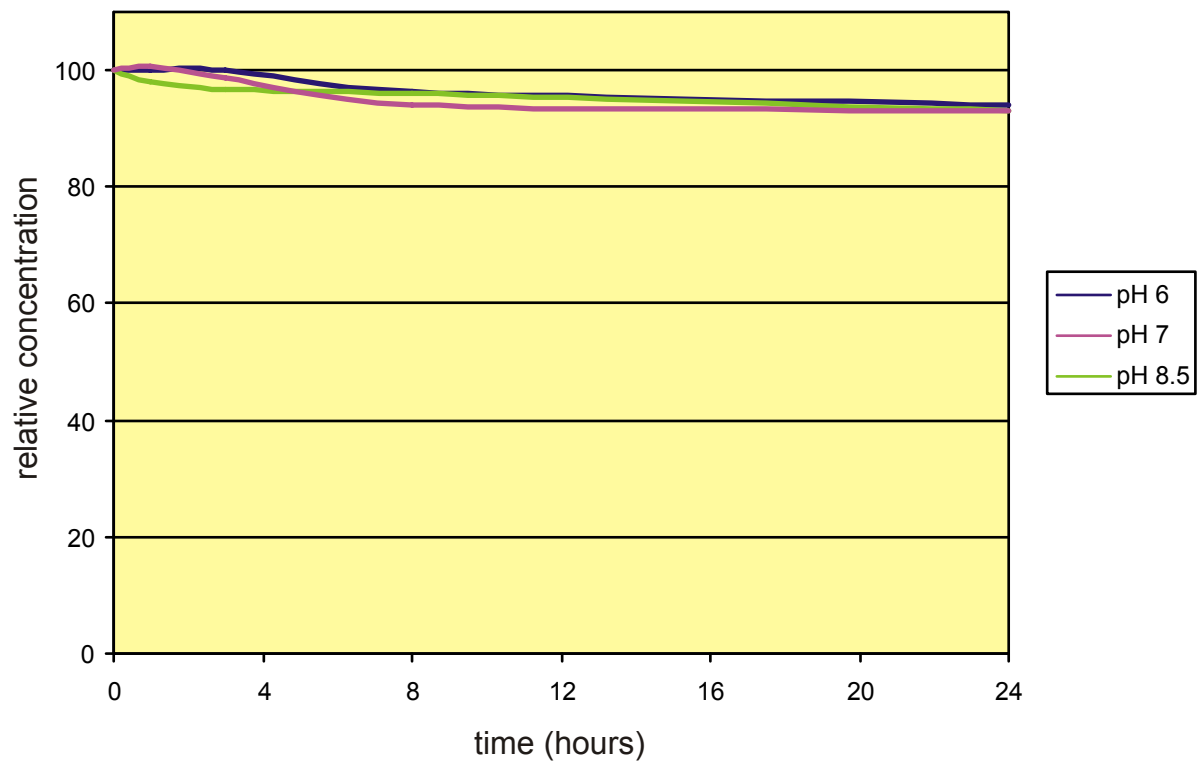

# Figure S5, Raijmakers et al.

PSME2, peptide **ALVHERDEAVYGLR**

**Monoisotopic mass of neutral peptide Mr(calc):** 1773.9311

**Variable modifications:** N-term : Dimethyl:2H(4) (N-term)

**Ions Score:** 48 **Expect:** 0.00031

**Matches (Bold Red):** 39/146 fragment ions using 84 most intense peaks

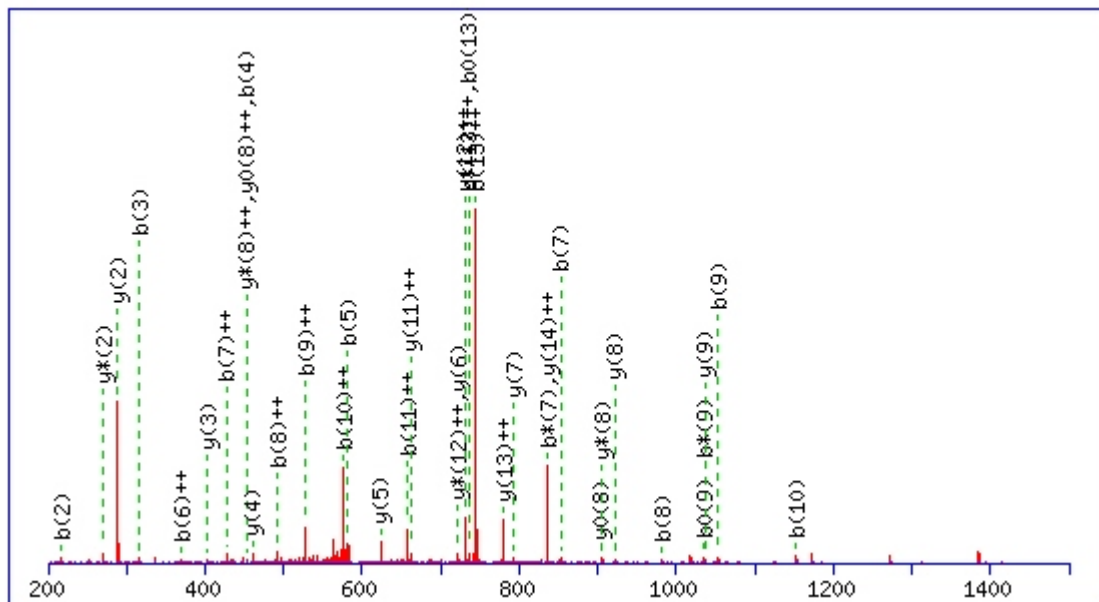

071206\_RR\_05g #3978 RT: 49.14 AV: 1 NL: 2.12E4  
T: ITMS + c NSI d Full ms2 592.32@cid35.00 [150.00-1790.00]

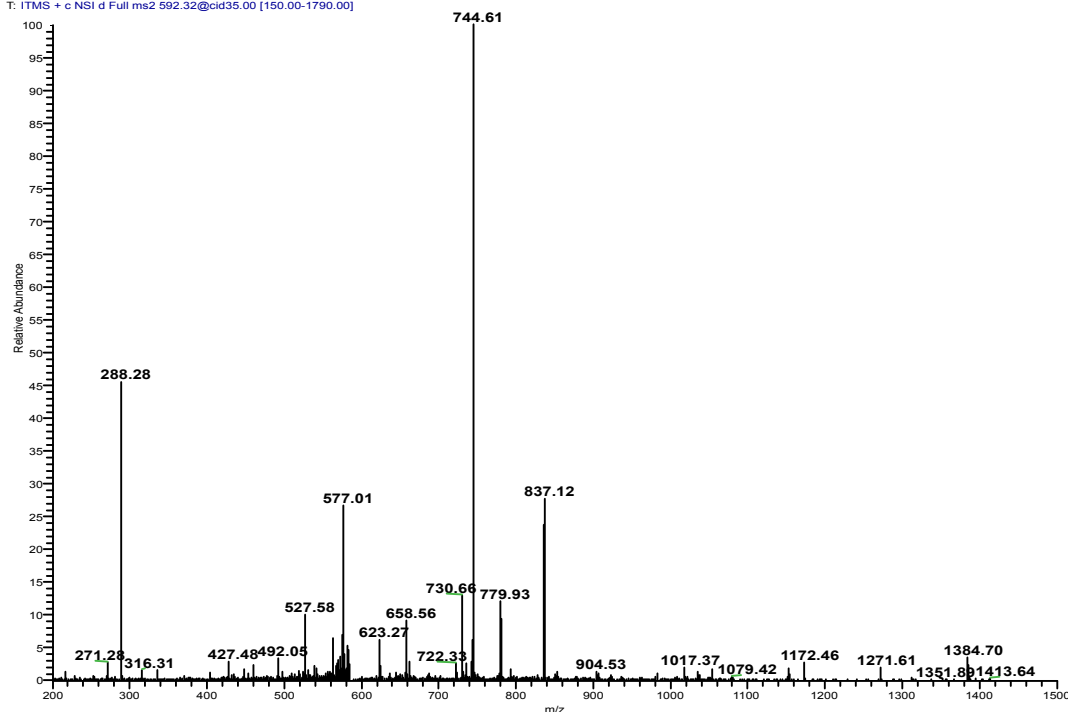

Supplement: M800093-MCP200_1.pdf [file M800093-MCP200_1.pdf]
