# Supplementary material
Source: PubMed Central journal article supplement (PMC2556017)
Supplement: M800093-MCP200_2.pdf [file M800093-MCP200_2.pdf]

Table S1, Raijmakers et al.

| <b>Experiment</b>              | <b>Protein</b> | <b># Quantified peptides</b> | <b>Average log 2 ratio</b> | <b>Standard deviation log 2 ratio</b> |
|--------------------------------|----------------|------------------------------|----------------------------|---------------------------------------|
| 300 fmol light ;10 fmol heavy  | BSA            | 10                           | -5.041                     | 0.529                                 |
| 300 fmol light ;30 fmol heavy  | BSA            | 10                           | -3.410                     | 0.701                                 |
| 300 fmol light ;100 fmol heavy | BSA            | 10                           | -1.733                     | 0.538                                 |
| 300 fmol light ;300 fmol heavy | BSA            | 10                           | 0.003                      | 0.229                                 |
| 100 fmol light ;300 fmol heavy | BSA            | 10                           | 1.645                      | 0.454                                 |
| 30 fmol light ;300 fmol heavy  | BSA            | 10                           | 3.544                      | 0.349                                 |
| 10 fmol light ;300 fmol heavy  | BSA            | 10                           | 5.132                      | 0.337                                 |

Quantitation data corresponding to Raijmakers et al., Figure 3

Table S2, Raijmakers et al.

| Accession number | # Quantified peptides | Average log 2 ratio | Standard deviation log 2 ratio |
|------------------|-----------------------|---------------------|--------------------------------|
| IPI00830223      | 2                     | -0.144              | 0.279                          |
| IPI00336362      | 2                     | -0.127              | 0.174                          |
| IPI00117857      | 2                     | -0.122              | 0.270                          |
| IPI00229080      | 10                    | -0.108              | 0.192                          |
| IPI00330804      | 2                     | -0.100              | 0.018                          |
| IPI00116074      | 3                     | -0.085              | 0.354                          |
| IPI00124692      | 2                     | -0.075              | 0.116                          |
| IPI00308885      | 2                     | -0.067              | 0.103                          |
| IPI00469952      | 3                     | -0.041              | 0.255                          |
| IPI00226430      | 3                     | -0.040              | 0.276                          |
| IPI00137409      | 6                     | -0.035              | 0.111                          |
| IPI00169463      | 6                     | -0.031              | 0.154                          |
| IPI00127596      | 3                     | -0.026              | 0.018                          |
| IPI00119111      | 2                     | -0.020              | 0.046                          |
| IPI00127560      | 3                     | -0.016              | 0.082                          |
| IPI00380436      | 3                     | -0.013              | 0.254                          |
| IPI00123313      | 6                     | -0.009              | 0.147                          |
| IPI00123924      | 5                     | -0.007              | 0.276                          |
| IPI00555059      | 5                     | -0.005              | 0.083                          |
| IPI00469114      | 3                     | -0.001              | 0.117                          |
| IPI00553333      | 4                     | 0.009               | 0.161                          |
| IPI00136906      | 2                     | 0.011               | 0.154                          |
| IPI00230212      | 3                     | 0.014               | 0.100                          |
| IPI00380873      | 8                     | 0.015               | 0.291                          |
| IPI00319994      | 3                     | 0.015               | 0.172                          |
| IPI00115679      | 2                     | 0.015               | 0.004                          |
| IPI00131830      | 9                     | 0.017               | 0.201                          |
| IPI00323357      | 10                    | 0.020               | 0.117                          |
| IPI00462072      | 2                     | 0.022               | 0.026                          |
| IPI00221402      | 6                     | 0.022               | 0.109                          |
| IPI00230395      | 4                     | 0.023               | 0.042                          |
| IPI00405058      | 5                     | 0.024               | 0.050                          |
| IPI00131138      | 7                     | 0.025               | 0.141                          |
| IPI00113223      | 10                    | 0.025               | 0.132                          |
| IPI00119667      | 2                     | 0.026               | 0.017                          |
| IPI00110753      | 5                     | 0.028               | 0.142                          |
| IPI00123223      | 2                     | 0.035               | 0.073                          |
| IPI00405227      | 34                    | 0.036               | 0.173                          |
| IPI00132722      | 7                     | 0.041               | 0.093                          |

| Accession number | # Quantified peptides | Average log 2 ratio | Standard deviation log 2 ratio |
|------------------|-----------------------|---------------------|--------------------------------|
| IPI00377351      | 4                     | 0.042               | 0.042                          |
| IPI00110850      | 13                    | 0.042               | 0.137                          |
| IPI00121209      | 3                     | 0.042               | 0.052                          |
| IPI00309768      | 2                     | 0.044               | 0.033                          |
| IPI00623845      | 2                     | 0.045               | 0.022                          |
| IPI00169916      | 4                     | 0.048               | 0.157                          |
| IPI00115522      | 3                     | 0.053               | 0.129                          |
| IPI00117167      | 3                     | 0.053               | 0.204                          |
| IPI00355382      | 2                     | 0.055               | 0.246                          |
| IPI00466069      | 5                     | 0.058               | 0.062                          |
| IPI00848801      | 5                     | 0.064               | 0.127                          |
| IPI00131695      | 13                    | 0.066               | 0.101                          |
| IPI00114375      | 11                    | 0.067               | 0.206                          |
| IPI00555069      | 3                     | 0.069               | 0.061                          |
| IPI00457659      | 2                     | 0.070               | 0.045                          |
| IPI00139788      | 3                     | 0.072               | 0.083                          |
| IPI00462934      | 2                     | 0.072               | 0.015                          |
| IPI00468203      | 3                     | 0.077               | 0.031                          |
| IPI00776343      | 3                     | 0.078               | 0.071                          |
| IPI00128642      | 10                    | 0.086               | 0.147                          |
| IPI00624663      | 5                     | 0.087               | 0.092                          |
| IPI00323592      | 4                     | 0.090               | 0.103                          |
| IPI00323624      | 4                     | 0.091               | 0.039                          |
| IPI00317309      | 10                    | 0.092               | 0.054                          |
| IPI00318671      | 3                     | 0.093               | 0.155                          |
| IPI00316491      | 2                     | 0.097               | 0.137                          |
| IPI00387422      | 3                     | 0.101               | 0.097                          |
| IPI00336324      | 4                     | 0.103               | 0.113                          |
| IPI00408119      | 2                     | 0.113               | 0.065                          |
| IPI00126248      | 2                     | 0.119               | 0.104                          |
| IPI00465786      | 17                    | 0.133               | 0.179                          |
| IPI00125091      | 3                     | 0.133               | 0.122                          |
| IPI00223757      | 2                     | 0.156               | 0.008                          |
| IPI00622235      | 7                     | 0.190               | 0.378                          |
| IPI00123181      | 2                     | 0.202               | 0.335                          |
| IPI00420882      | 2                     | 0.206               | 0.334                          |
| IPI00129526      | 2                     | 0.212               | 0.004                          |
| IPI00312058      | 3                     | 0.223               | 0.126                          |
| IPI00467447      | 3                     | 0.246               | 0.005                          |

All proteins accession numbers corresponding to IPI mouse v3.36

Quantitation data corresponding to Raijmakers et al., Figure 4A

Table S3, Raijmakers et al.

| Accession number | # Quantified peptides | Average log 2 ratio | Standard deviation log 2 ratio | Accession number | # Quantified peptides | Average log 2 ratio | Standard deviation log 2 ratio |
|------------------|-----------------------|---------------------|--------------------------------|------------------|-----------------------|---------------------|--------------------------------|
| IPI00230044      | 3                     | -2.202              | 0.248                          | IPI00128249      | 2                     | 0.046               | 0.129                          |
| IPI00555059      | 7                     | -2.063              | 0.156                          | IPI00776343      | 3                     | 0.058               | 0.044                          |
| IPI00230212      | 4                     | -2.049              | 0.099                          | IPI00462072      | 6                     | 0.072               | 0.307                          |
| IPI00121440      | 4                     | -2.031              | 0.255                          | IPI00323357      | 6                     | 0.076               | 0.305                          |
| IPI00317309      | 3                     | -2.008              | 0.092                          | IPI00114375      | 3                     | 0.084               | 0.132                          |
| IPI00116498      | 3                     | -1.992              | 0.041                          | IPI00312058      | 4                     | 0.101               | 0.145                          |
| IPI00353727      | 2                     | -1.989              | 0.176                          | IPI00323624      | 3                     | 0.127               | 0.060                          |
| IPI00128642      | 11                    | -1.975              | 0.154                          | IPI00131695      | 8                     | 0.136               | 0.141                          |
| IPI00113996      | 3                     | -1.956              | 0.487                          | IPI00137409      | 6                     | 0.138               | 0.231                          |
| IPI00230682      | 2                     | -1.919              | 0.432                          | IPI00127560      | 3                     | 0.169               | 0.017                          |
| IPI00221890      | 2                     | -1.919              | 0.130                          | IPI00119667      | 2                     | 0.170               | 0.075                          |
| IPI00121209      | 8                     | -1.763              | 0.126                          | IPI00387422      | 3                     | 0.303               | 0.018                          |
| IPI00553333      | 5                     | -1.717              | 0.122                          | IPI00318671      | 2                     | 0.369               | 0.213                          |
| IPI00316491      | 2                     | -1.681              | 0.081                          | IPI00131830      | 6                     | 0.445               | 0.253                          |
| IPI00465786      | 3                     | -1.595              | 0.569                          | IPI00387422      | 2                     | 1.143               | 0.194                          |
| IPI00110658      | 3                     | -1.591              | 0.096                          | IPI00110658      | 2                     | 1.164               | 0.457                          |
| IPI00230706      | 2                     | -1.481              | 0.748                          | IPI00553333      | 2                     | 1.526               | 0.004                          |
| IPI00131830      | 9                     | -0.488              | 0.543                          | IPI00648086      | 3                     | 1.645               | 0.266                          |
| IPI00758028      | 2                     | -0.299              | 0.513                          | IPI00127596      | 4                     | 1.727               | 0.178                          |
| IPI00626662      | 3                     | -0.156              | 0.245                          | IPI00132722      | 4                     | 1.796               | 0.207                          |
| IPI00110753      | 5                     | -0.147              | 0.131                          | IPI00319994      | 2                     | 1.822               | 0.136                          |
| IPI00380873      | 2                     | -0.101              | 0.274                          | IPI00229080      | 5                     | 1.874               | 0.111                          |
| IPI00230108      | 4                     | -0.090              | 0.387                          | IPI00652436      | 6                     | 1.893               | 0.236                          |
| IPI00407130      | 5                     | -0.088              | 0.424                          | IPI00405227      | 15                    | 1.912               | 0.111                          |
| IPI00115522      | 3                     | -0.086              | 0.139                          | IPI00124692      | 3                     | 1.949               | 0.116                          |
| IPI00623845      | 7                     | -0.086              | 0.195                          | IPI00136906      | 2                     | 1.972               | 0.020                          |
| IPI00139788      | 2                     | -0.060              | 0.009                          | IPI00133580      | 5                     | 1.980               | 0.174                          |
| IPI00114375      | 5                     | -0.048              | 0.555                          | IPI00468203      | 2                     | 2.022               | 0.209                          |
| IPI00169463      | 7                     | -0.042              | 0.127                          | IPI00555069      | 2                     | 2.025               | 0.380                          |
| IPI00117857      | 3                     | -0.030              | 0.195                          | IPI00336324      | 2                     | 2.052               | 0.173                          |
| IPI00652436      | 11                    | -0.027              | 0.093                          | IPI00317309      | 5                     | 2.056               | 0.360                          |
| IPI00111218      | 5                     | -0.026              | 0.235                          | IPI00123313      | 3                     | 2.059               | 0.181                          |
| IPI00131695      | 10                    | -0.006              | 0.209                          | IPI00853925      | 4                     | 2.066               | 0.243                          |
| IPI00129755      | 4                     | 0.007               | 0.206                          | IPI00380873      | 4                     | 2.153               | 0.216                          |
|                  |                       |                     |                                | IPI00624663      | 3                     | 2.349               | 0.489                          |

All proteins accession numbers corresponding to IPI mouse v3.36

Quantitation data corresponding to Raijmakers et al., Figure 4B

Table S4, Raijmakers et al.

| Accession number | # Quantified peptides | Average log 2 ratio | Standard deviation log 2 ratio | Description                                      |
|------------------|-----------------------|---------------------|--------------------------------|--------------------------------------------------|
| IPI00685901      | 7                     | -3.650              | 0.741                          | PSMB5 Proteasome subunit beta type 5             |
| IPI00712187      | 5                     | -1.418              | 1.534                          | MGC133789 Proteasome subunit beta type 7         |
| IPI00697260      | 2                     | -0.966              | 0.114                          | PSMB6 Proteasome subunit beta type-6 precursor   |
| IPI00700444      | 5                     | -0.465              | 0.817                          | PSMB2 Proteasome subunit beta type-2             |
| IPI00705531      | 8                     | -0.393              | 0.924                          | PSMA4 Proteasome subunit alpha type-4            |
| IPI00713535      | 5                     | -0.364              | 1.127                          | PSMA2 Proteasome subunit alpha type-2            |
| IPI00705755      | 1                     | -0.042              | n/a                            | MGC128032 Proteasome subunit beta type-3         |
| IPI00722440      | 6                     | 0.004               | 0.726                          | PSMB1 Proteasome subunit beta type-1 precursor   |
| IPI00715748      | 11                    | 0.141               | 1.004                          | PSMA6 Proteasome subunit alpha type-6            |
| IPI00687075      | 8                     | 0.359               | 0.794                          | PSMA1 Proteasome subunit alpha type-1            |
| IPI00711587      | 7                     | 0.395               | 0.532                          | PSMA3 Proteasome subunit alpha type-3            |
| IPI00695078      | 8                     | 0.609               | 0.859                          | PSMA7 Proteasome subunit alpha type-7            |
| IPI00707875      | 5                     | 0.611               | 0.512                          | PSMA5 Proteasome subunit alpha type-5            |
| IPI00697757      | 6                     | 0.661               | 0.899                          | PSMB4 Proteasome subunit beta type-4 precursor   |
| IPI00726885      | 5                     | 2.934               | 0.466                          | PSMB8 Proteasome subunit beta type-8 precursor   |
| IPI00707279      | 3                     | 3.127               | 0.310                          | PSME1 Proteasome activator complex subunit 1     |
| IPI00706307      | 3                     | 4.460               | 0.917                          | PSMB10 Proteasome subunit beta type-10 precursor |
| IPI00697970      | 2                     | 4.995               | 0.830                          | PSME2 Proteasome activator complex subunit 2     |
| IPI00695176      | 3                     | 5.386               | 0.374                          | PSMB9 Proteasome subunit beta type-9 precursor   |

All proteins accession numbers corresponding to IPI cow v3.22

Quantitation data corresponding to Raijmakers et al., Figure 5C

Table S5, Raijmakers et al.

| Proteasome protein | Database      | Description                                      | IPI Accession | Mascot protein score | Unique peptides (ion score >20) | Coverage |
|--------------------|---------------|--------------------------------------------------|---------------|----------------------|---------------------------------|----------|
| Alpha 7            | IPI cow v3.22 | PSMA7 Proteasome subunit alpha type-7            | IPI00695078   | 783                  | 11                              | 53%      |
| Alpha 5            | IPI cow v3.22 | PSMA5 Proteasome subunit alpha type-5            | IPI00707875   | 572                  | 7                               | 32%      |
| Alpha 1            | IPI cow v3.22 | PSMA1 Proteasome subunit alpha type-1            | IPI00687075   | 494                  | 11                              | 40%      |
| Alpha 6            | IPI cow v3.22 | PSMA6 Proteasome subunit alpha type-6            | IPI00715748   | 484                  | 12                              | 50%      |
| Alpha 2            | IPI cow v3.22 | PSMA2 Proteasome subunit alpha type-2            | IPI00713535   | 470                  | 8                               | 40%      |
| Beta 4             | IPI cow v3.22 | PSMB4 Proteasome subunit beta type-4 precursor   | IPI00697757   | 464                  | 7                               | 34%      |
| Beta 1             | IPI cow v3.22 | PSMB1 Proteasome subunit beta type-1 precursor   | IPI00722440   | 297                  | 6                               | 23%      |
| Alpha 4            | IPI cow v3.22 | PSMA4 Proteasome subunit alpha type-4            | IPI00705531   | 291                  | 8                               | 26%      |
| Beta 5             | IPI cow v3.22 | PSMB5 Proteasome subunit beta type               | IPI00685901   | 270                  | 7                               | 29%      |
| Alpha 3            | IPI cow v3.22 | PSMA3 Proteasome subunit alpha type-3            | IPI00711587   | 261                  | 11                              | 45%      |
| Beta 9             | IPI cow v3.22 | PSMB9 Proteasome subunit beta type-9 precursor   | IPI00695176   | 193                  | 4                               | 25%      |
| Beta 8             | IPI cow v3.22 | PSMB8 Proteasome subunit beta type-8 precursor   | IPI00726885   | 165                  | 6                               | 22%      |
| Beta 7             | IPI cow v3.22 | MGC133789 Proteasome subunit beta type           | IPI00712187   | 133                  | 5                               | 18%      |
| Beta 6             | IPI cow v3.22 | PSMB6 Proteasome subunit beta type-6 precursor   | IPI00697260   | 118                  | 4                               | 18%      |
| Beta 2             | IPI cow v3.22 | PSMB2 Proteasome subunit beta type-2             | IPI00700444   | 106                  | 7                               | 31%      |
| Beta 10            | IPI cow v3.22 | PSMB10 Proteasome subunit beta type-10 precursor | IPI00706307   | 104                  | 3                               | 12%      |
| PSME1              | IPI cow v3.22 | PSME1 Proteasome activator complex subunit 1     | IPI00707279   | 128                  | 5                               | 22%      |
| Beta 3             | IPI cow v3.22 | MGC128032 Proteasome subunit beta type-3         | IPI00705755   | 54                   | 3                               | 15%      |
| PSME2              | IPI cow v3.22 | PSME2 Proteasome activator complex subunit 2     | IPI00697970   | 48                   | 2                               | 10%      |

All proteins accession numbers corresponding to IPI cow v3.22

Identification data corresponding to Raijmakers et al., Figure 5C
